# Supplementary material for: Rhodium-catalyzed diastereoselective synthesis of highly substituted morpholines from nitrogen-tethered allenols
Source: Royal Society of Chemistry journal article supplement (doi:10.1039/d3cc00151b), 2023-01-01
Supplement: d3cc00151b1.pdf [file d3cc00151b1.pdf]

*Supporting Information*

**Rhodium-Catalyzed Diastereoselective Synthesis of Highly Substituted Morpholines from Nitrogen-Tethered Allenols**

**Azim Ziyaei Halimehjani\*<sup>a,b</sup> and Bernhard Breit\*<sup>c</sup>**

<sup>a</sup> *Department of Chemistry, Sharif University of Technology, P.O. Box 11155-9516, Tehran, Iran. E-mail: [azim.ziyaei@sharif.edu](mailto:azim.ziyaei@sharif.edu)*

<sup>b</sup> *Faculty of Chemistry, Kharazmi University, P. O. Box 15719-14911, 49 Mofateh Street, Tehran, Iran. E-mail: [ziyaei@khu.ac.ir](mailto:ziyaei@khu.ac.ir)*

<sup>c</sup> *Institut für Organische Chemie, Albert-Ludwigs-Universität Freiburg, Albert strasse 21, 79104 Freiburg im Breisgau (Germany). E-mail: [bernhard.breit@chemie.uni-freiburg.de](mailto:bernhard.breit@chemie.uni-freiburg.de)*

| <b>Contents</b>                                                         | <b>Pages</b> |
|-------------------------------------------------------------------------|--------------|
| Proposed mechanism                                                      | 2-3          |
| Determination of the stereochemistry of products by NOESY analyses      | 3-7          |
| Experimental: General remarks                                           | 8            |
| Synthesis of starting materials and their characterization data         | 9-60         |
| Synthesis of functionalized morpholines and their characterization data | 61-116       |
| References                                                              | 117          |

## Proposed mechanism

Proposed mechanism for the synthesis of substituted morpholines by using Rhodium/ligand catalytic system in the presence of an additive is depicted in Scheme 1.

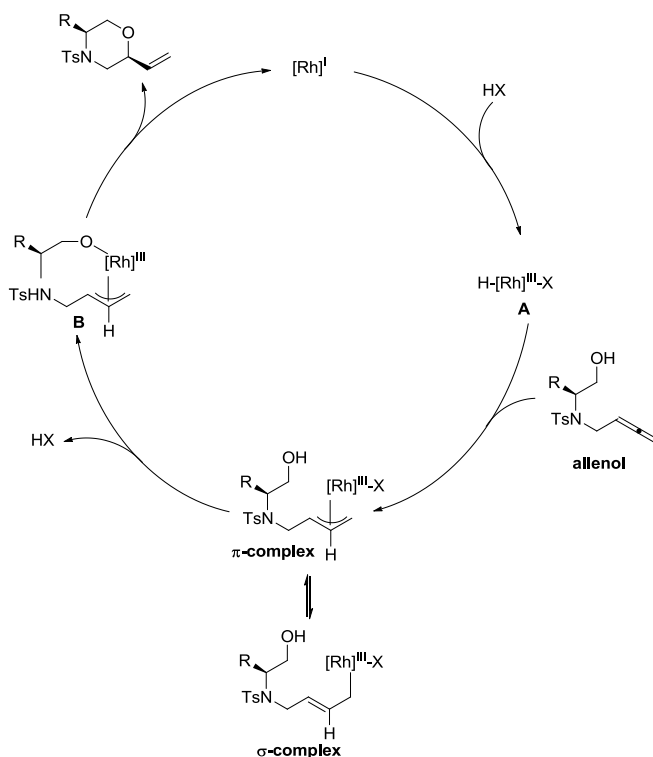

**Scheme 1.** Proposed mechanism for Rh-catalyzed synthesis of substituted morpholines

By considering the spatial orientation of substituents in two possible diastereomers as described in Scheme 2, it can be concluded that the *cis* diastereomer is more stable than the *trans* diastereomer due to the lack of unfavorable 1,3-diaxial interactions between the  $\pi$ -allyl moiety and the axial hydrogen/alkyl group at C6.

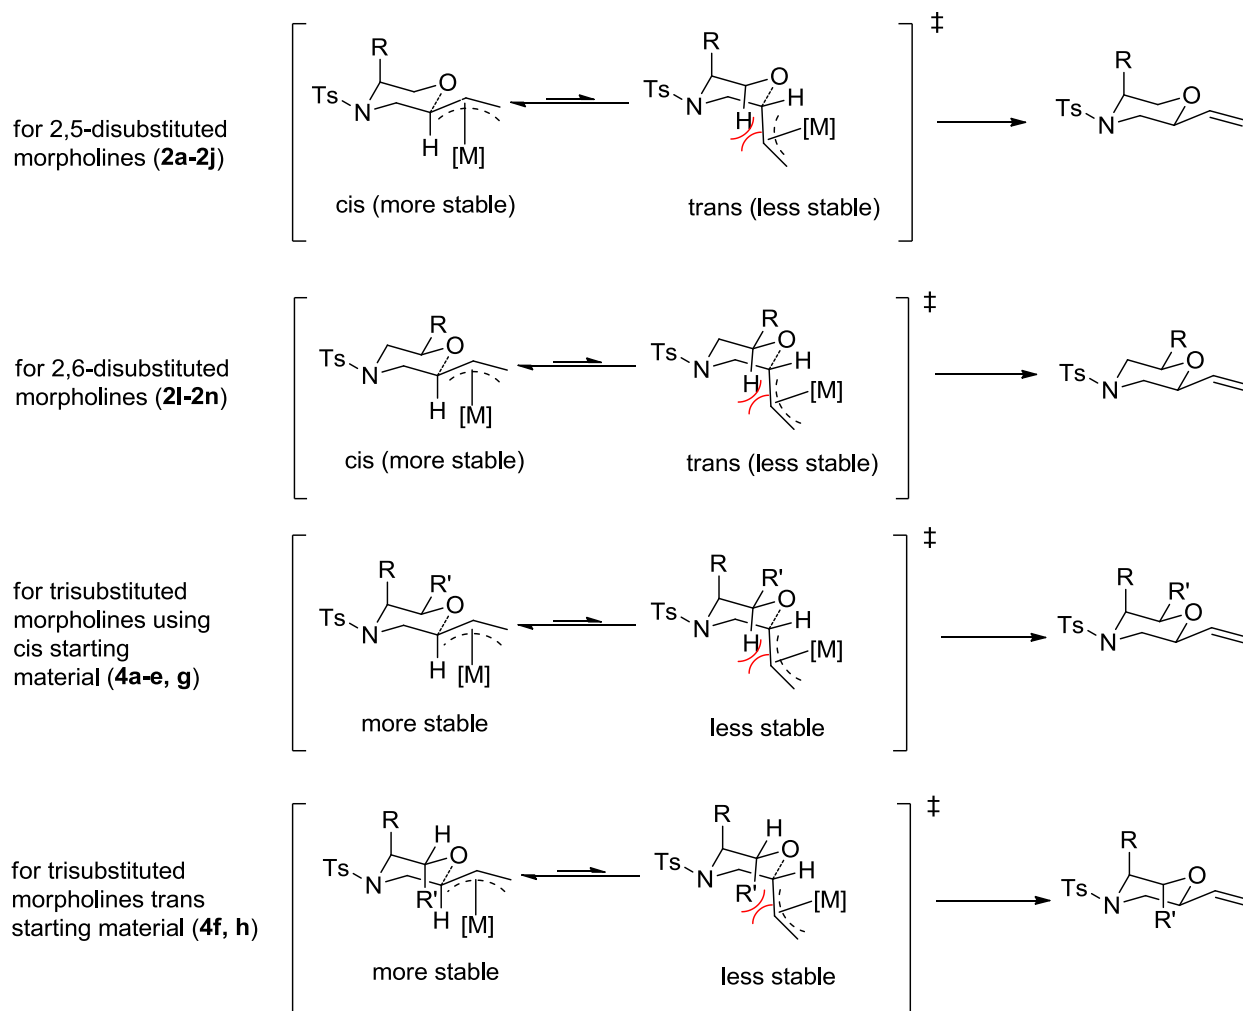

**Scheme 2.** Relative stability of *cis* and *trans* diastereoisomers in di- and trisubstituted morpholines

### Determination of the stereochemistry of products by NOESY experiment

The structures of all final products (**2a-n**, **4a-h** and **5-8**) were determined by using  $^1\text{H}$  NMR,  $^{13}\text{C}$  NMR, DQF-COSY, edHSQC, HMBC NMR techniques and HRMS analysis. After determining the chemical shifts of carbons and hydrogens by the mentioned NMR techniques, the stereochemistry of all products was examined by the aid of NOESY experiment. The results of NOESY experiment for compound **2d** are described here as an example (selected important correlations are depicted in Figure 1). The NOESY experiment of **2d** shows space correlation of H10 ( $\delta$  5.74) with the axial hydrogen in the position 3 ( $\delta$  2.90 ppm). In addition, H<sub>ax</sub> in the position 3 shows correlations with H7 and H7' ( $\delta$  1.36 ppm and 1.53 ppm). Furthermore, H2 ( $\delta$

3.74 ppm) correlates with axial hydrogen in the position 6 ( $\delta$  3.54 ppm). By considering these important correlations, it can be simply concluded that the vinyl group in the position 2 and the isobutyl group in the position 5 are in *cis* configuration (Figures 2-4).

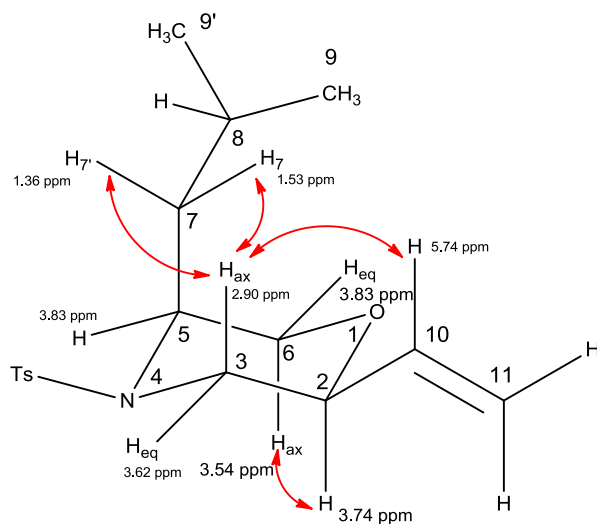

**Figure 1.** Selected correlations illustrations in compound **2d** by NOESY experiment

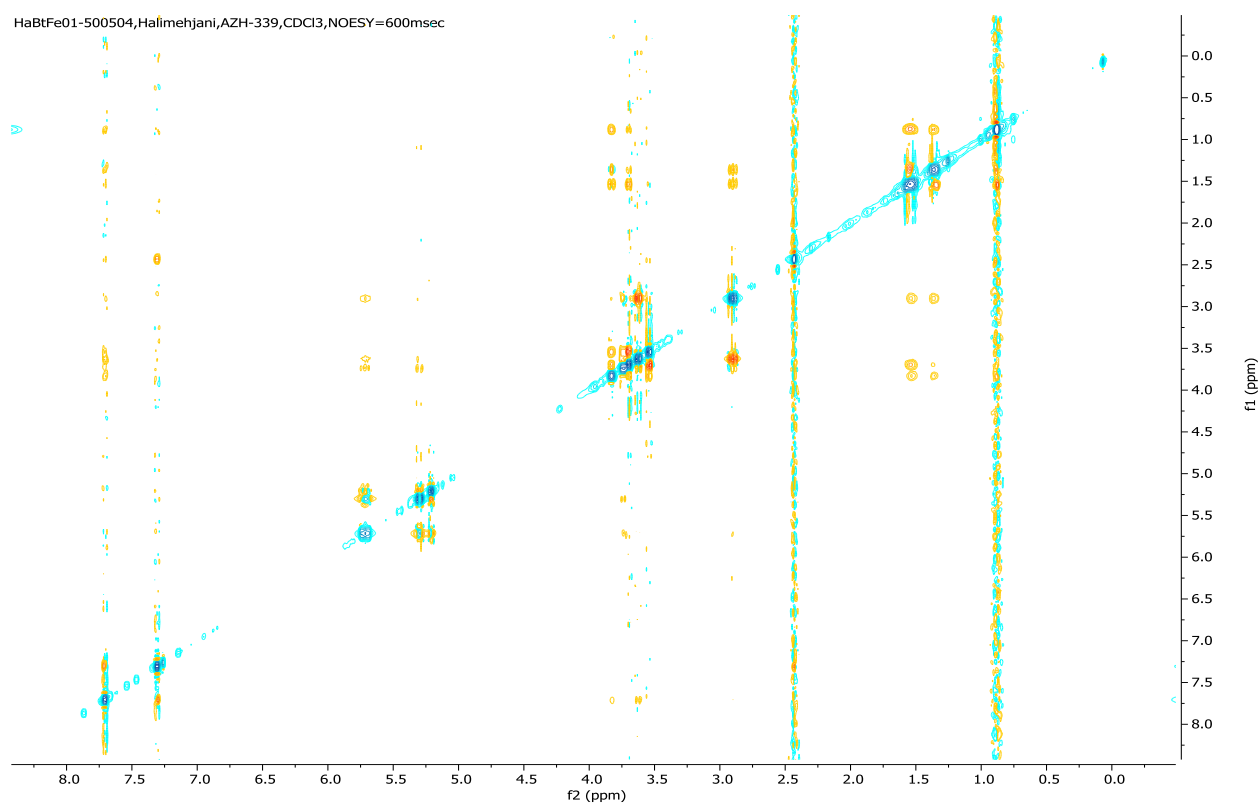

**Figure 2.** NOESY spectra for compound **2d**



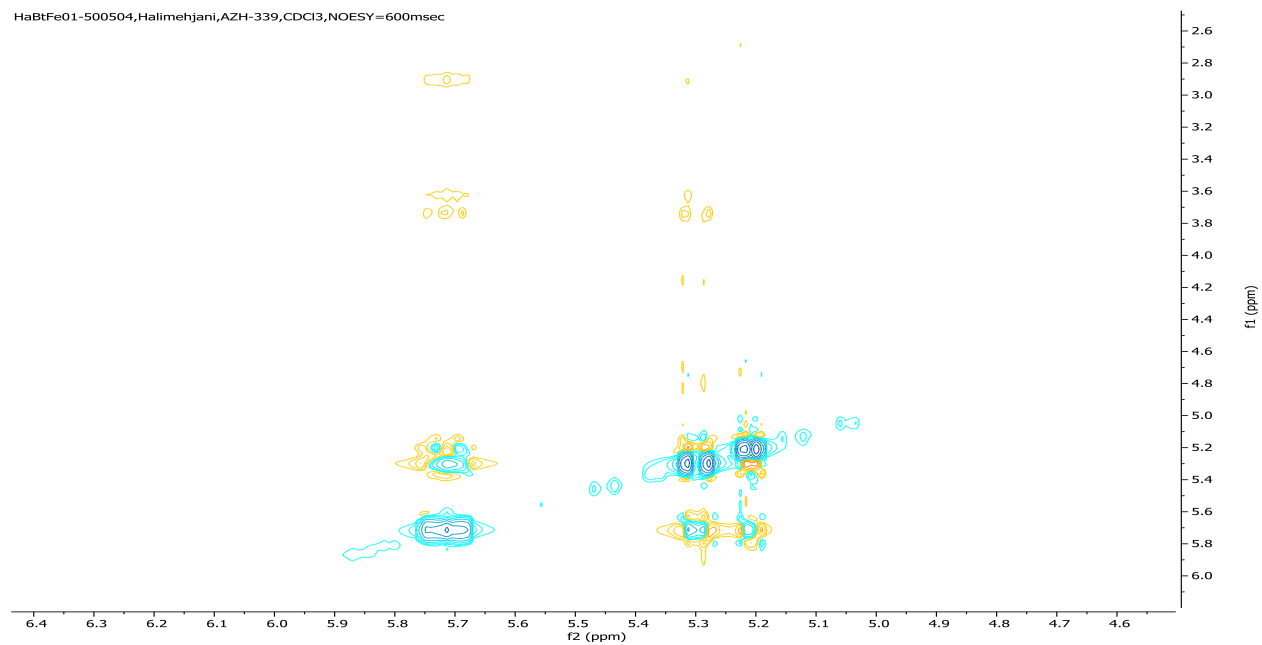

**Figure 3.** Expanded NOESY spectra for compound **2d**

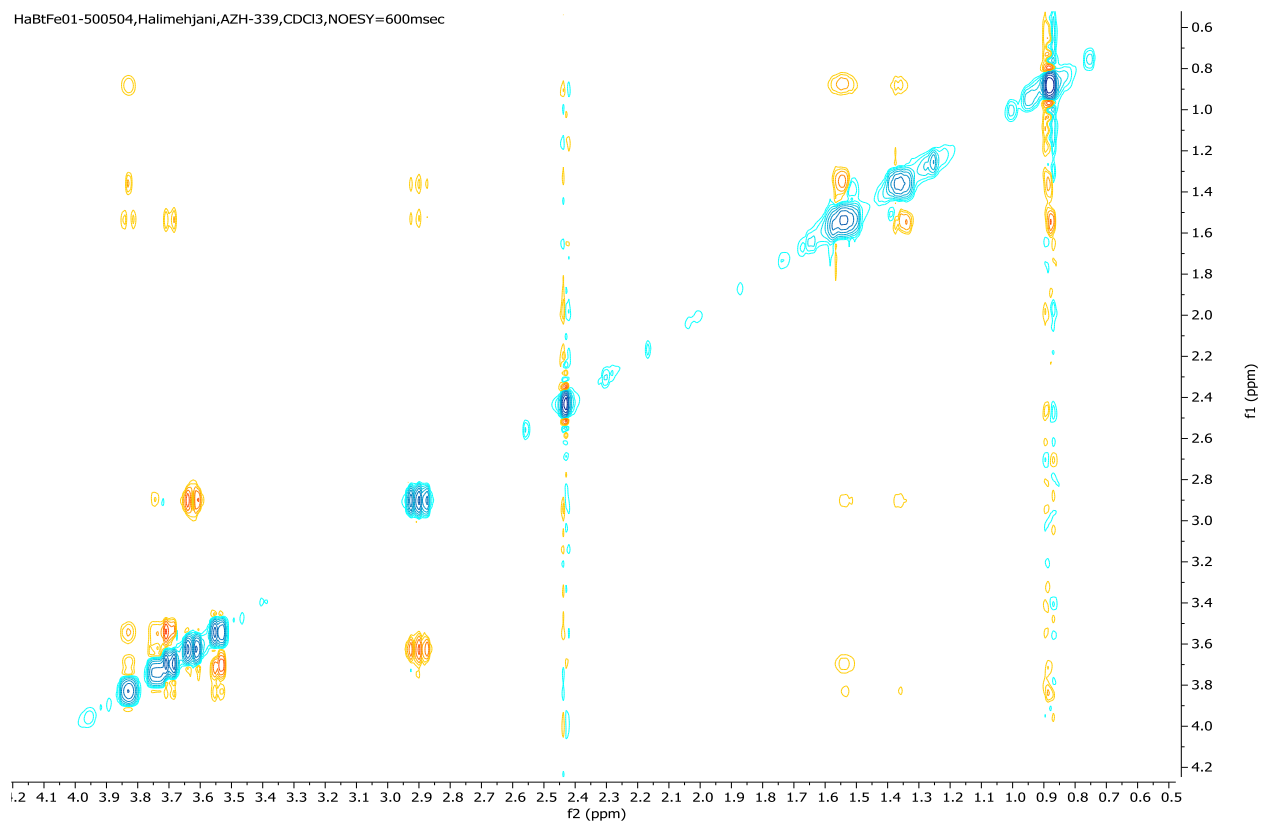

**Figure 4.** Expanded NOESY spectra for compound **2d**

The selected correlations in **4b** by NOESY experiment is illustrated in Figure 5. The NOESY experiment of **4b** shows space correlation of H10 ( $\delta$  5.76) with the axial hydrogen in the position 5 ( $\delta$  2.78 ppm). In addition, H<sub>ax</sub> in the position 5 shows correlation with the methyl group ( $\delta$  0.92 ppm) in position 3. The methyl group in position 3 correlates with the methyne hydrogen (H8,  $\delta$  1.54 ppm). Furthermore, H6 ( $\delta$  3.88 ppm) correlates with axial hydrogen in the position 2 ( $\delta$  3.02 ppm) (Figures 6-7). By considering these important correlations, the stereochemistry of **4b** was considered as all *cis* as depicted in Figure 5.

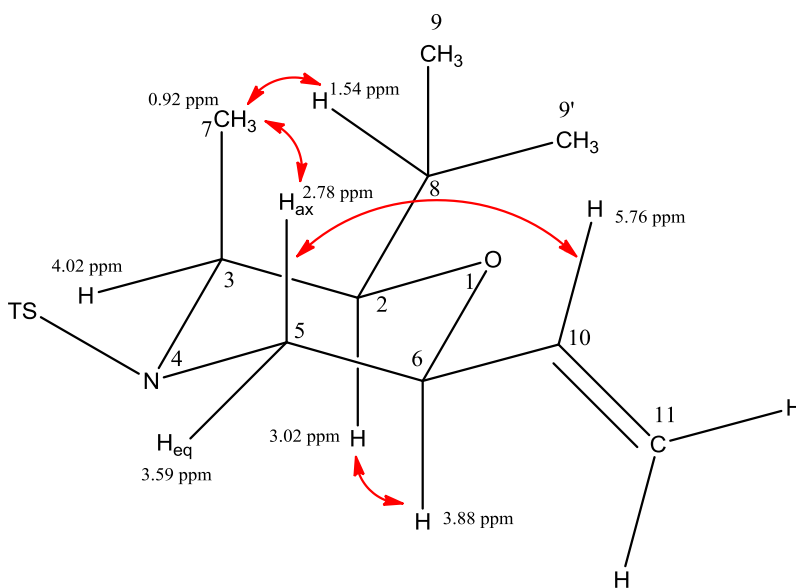

**Figure 5.** Selected correlations illustrations in compound **4b** by NOESY experiment

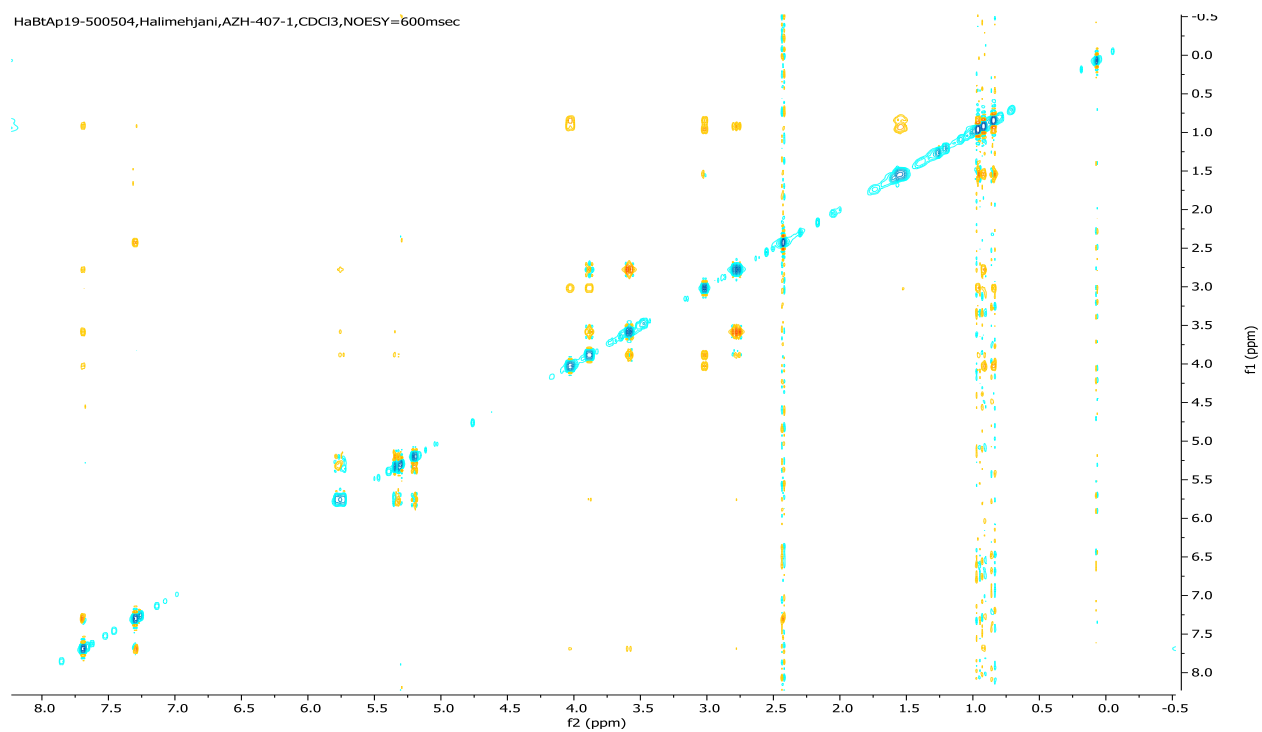

**Figure 6.** NOESY spectra for compound **4b**

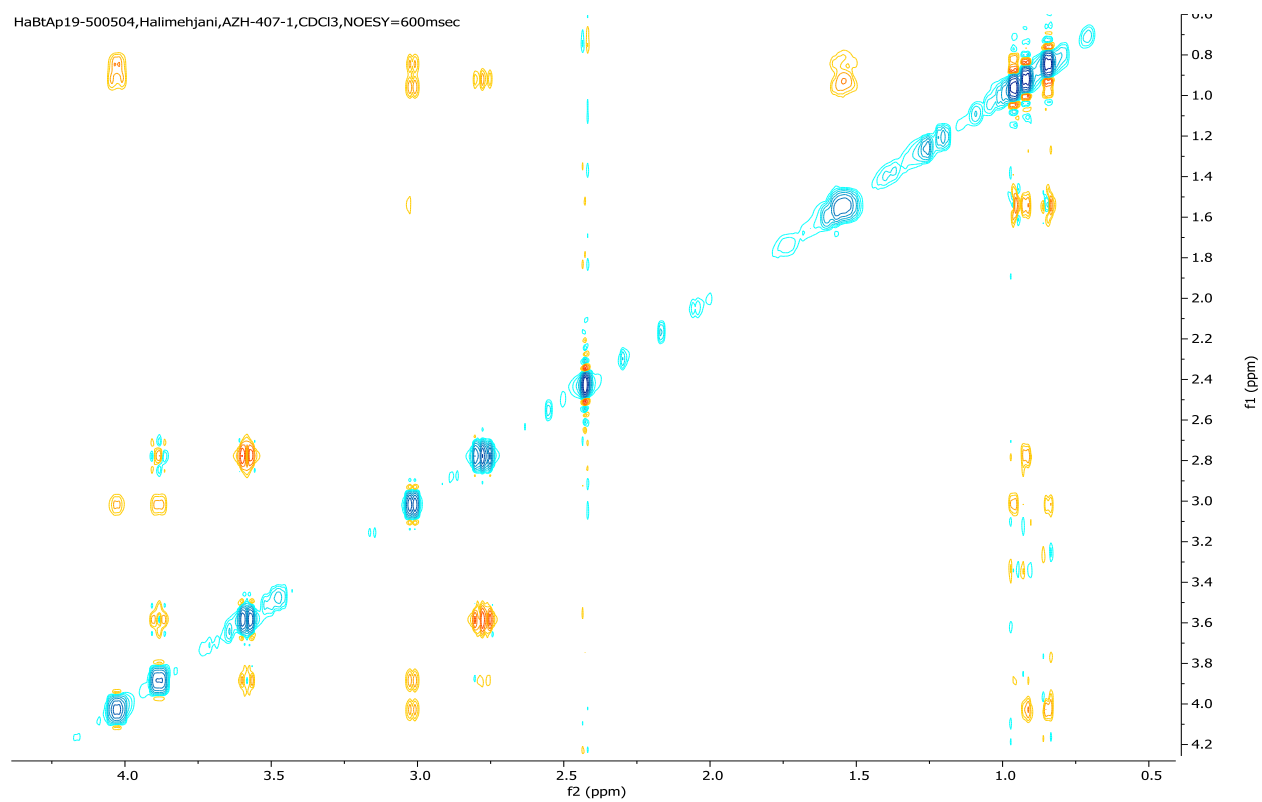

**Figure 7.** Expanded NOESY spectra for compound **4b**

## Experimental Section: General remarks

**Chemicals** were purchased from commercial suppliers and used as received.

The **reaction solvents** were dried in the lab before use. Solvents employed for work-up and column chromatography were purchased in technical grade quality and distilled before use.

**Column Chromatography** was performed using silica gel 60 (0.04 - 0.063 mm, 230 - 240 mesh ASTM) from Macherey-Nagel GmbH & Co. TLC (Thin Layer Chromatography) was performed on aluminum plates pre-coated with silica gel (MERCK, 60 F254), which were visualized by UV fluorescence ( $\lambda_{\text{max}} = 254 \text{ nm}$ ) and/or by staining with 1% w/v  $\text{KMnO}_4$  in 0.5 M aqueous  $\text{K}_2\text{CO}_3$  solution.

**NMR** spectra for the compounds were recorded on a Bruker Avance spectrometer (400 or 500 MHz for  $^1\text{H}$  and 100.6 or 126 MHz for  $^{13}\text{C}$  nucleus). All  $^1\text{H}$  NMR spectra are reported in parts per million (ppm) downfield of TMS and were measured relative to the signals at 7.26 ppm for chloroform. All  $^{13}\text{C}$  NMR spectra were reported in ppm relative to residual  $\text{CHCl}_3$  (77.16 ppm) and were obtained with  $^1\text{H}$ -decoupling. The *cis/trans* ratio was measured by evaluating the  $^1\text{H}$  NMR of crude mixture. The stereochemistry of products was confirmed using NOESY analysis.

**HRMS** (High Resolution Mass Spectra) was measured on a THERMO SCIENTIFIC Advantage and a THERMO SCIENTIFIC Exactive instrument equipped with an APCI source in the positive-ion mode.

**Chiral HPLC** was performed on a MERCK HITACHI HPLC apparatus (pump: L-7100, UV detector: D-7400, oven: L-7360; columns: AD-3, L-C3 and L-C3).

**Optical Rotation** of chiral compounds (dissolved in  $\text{CH}_2\text{Cl}_2$ ) was determined on a PERKIN-ELMER PE 241 apparatus and converted to the specific optical rotation with the following formula.

$$[\alpha]_D^T = \frac{\alpha \cdot 100}{c \cdot d}$$

$\alpha$ : measured value; c: concentration in g/100 mL; d: length of the cuvette in dm; T: temperature in  $^{\circ}\text{C}$ .

## Synthesis of starting materials and their characterization data

### Allenols

Allenols **1a-1h** and **1k** were prepared according to the general procedures 1-3 starting from the corresponding aminoalcohols, according to the following general scheme:

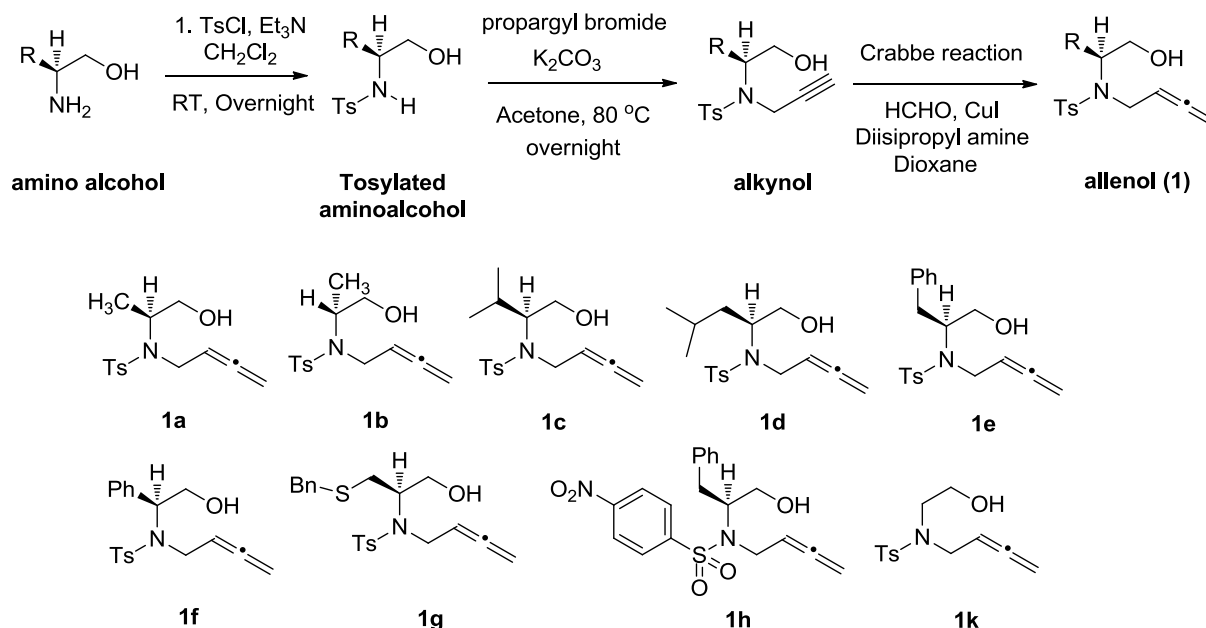

### General procedure 1: Tosylation (Nosylation) of aminoalcohols

To a solution of an aminoalcohol (1.0 equiv) and a sulfonyl chloride (1.1 equiv) in dichloromethane (3 mL/mmol) at  $0^\circ\text{C}$ ,  $\text{Et}_3\text{N}$  (1.1 equiv) was added gradually and the mixture was allowed to warm to room temperature and further stirred for overnight. Finally, the organic phase was washed with 2M aqueous HCl solution (2 x 2.5 mL/mmol), dried over  $\text{Na}_2\text{SO}_4$ , and evaporated to give the crude product. Recrystallization of the residue from diethyl ether/*n*-pentane afforded the pure tosylated aminoalcohol.<sup>1</sup>

### General Procedure 2: Synthesis of alkynols by propargylation reaction

A mixture of tosylated (Nosylated) aminoalcohol **2** (1.0 equiv), propargyl bromide (1.2 equiv), and  $\text{K}_2\text{CO}_3$  (1.0 equiv) in acetone (2 mL/mmol) was heated to  $85^\circ\text{C}$  for overnight. The mixture was filtered to remove solid and the filtrate was concentrated to afford the corresponding propargylated product.<sup>2</sup>

### General Procedure 3: Synthesis of allenols **1a-1h** and **1k** from corresponding alkynol by Crabbe reaction

A suspension of alkynol adduct (1.0 equiv), cuprous iodide (0.5 equiv), paraformaldehyde (2.5 equiv) and diisopropylamine (2.0 equiv) in dioxane (5 mL/mmol) was gently heated at reflux and stirred for 12 h, cooled to room temperature, and filtered through a Celite pad. The dark-brown filtrate was concentrated in vacuo to afford a gummy residue. The residue was triturated with diethyl ether and filtered through the same Celite pad. This procedure was repeated 2 more times until a light yellow filtrate was obtained. Finally, the solvent was evaporated under reduced pressure to afford the crude product which was purified by column chromatography.<sup>3</sup>

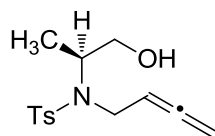

(*S*)-*N*-(buta-2,3-dien-1-yl)-*N*-(1-hydroxypropan-2-yl)-4-

methylbenzenesulfonamide (**1a**): <sup>1</sup>H NMR (500 MHz, Chloroform-*d*)  $\delta$  7.72 (d,  $J$  = 8.3 Hz, 2H), 7.28 (d,  $J$  = 7.9 Hz, 2H), 5.27 – 5.19 (m, 1H), 4.87 – 4.63 (m, 2H), 4.15 – 3.90 (m, 2H), 3.73–3.68 (m, 1H), 3.60–3.56 (m, 1H), 3.52–3.47 (m, 1H), 2.41 (s, 3H), 2.13 (brs, 1H), 0.95 (d,  $J$  = 7.0 Hz, 3H) ppm; <sup>13</sup>C NMR (126 MHz, CDCl<sub>3</sub>)  $\delta$  208.5, 143.4, 137.8, 129.7, 127.1, 88.9, 76.7, 64.6, 55.6, 42.4, 21.5, 14.5 ppm; HRMS (ESI) calcd for C<sub>14</sub>H<sub>19</sub>NO<sub>3</sub>S [M+H]<sup>+</sup>: 282.1164; found: 282.1161; [ $\alpha$ ]<sub>D</sub><sup>25</sup> = +63.12 (c = 0.385, CH<sub>2</sub>Cl<sub>2</sub>). The allenol **1b** was prepared by the same procedure.

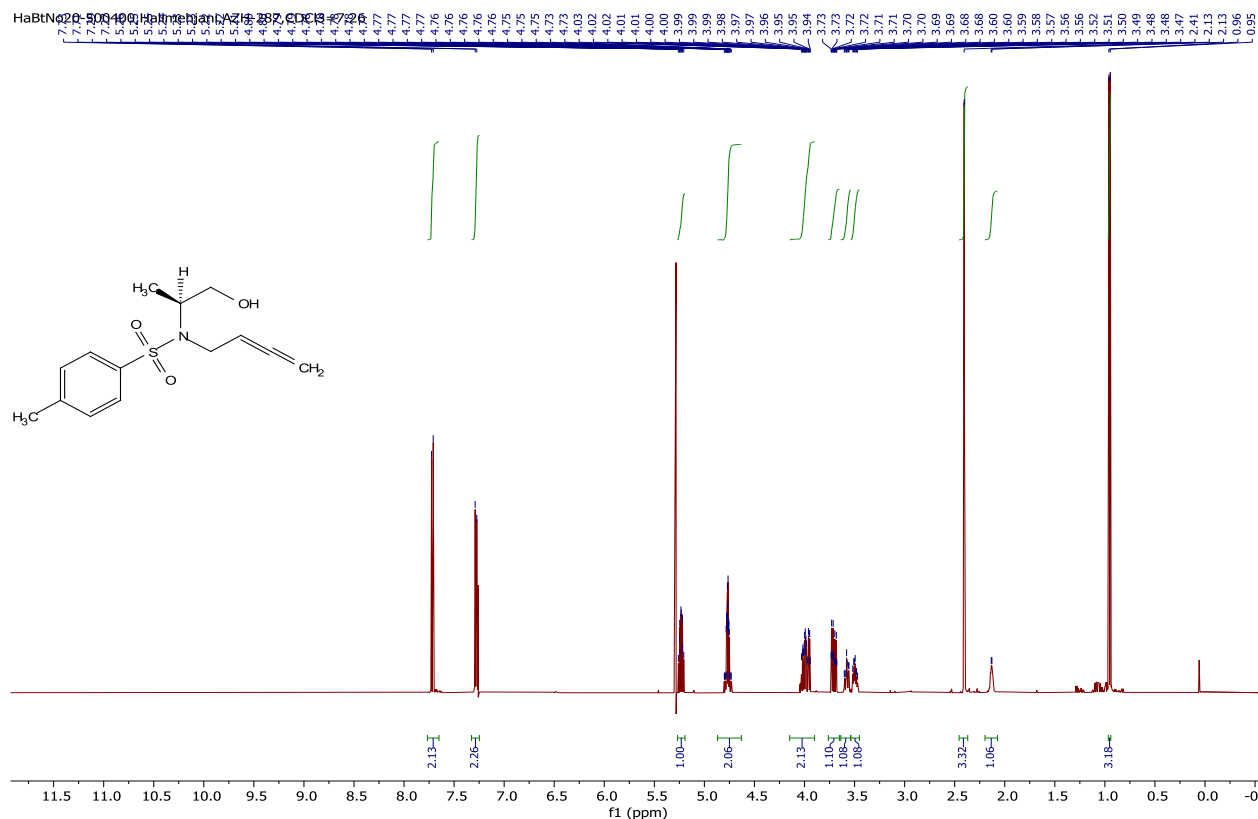

HaBtNo20-500401, Halimeh, AZH-287, CDCl<sub>3</sub> = 77.1000

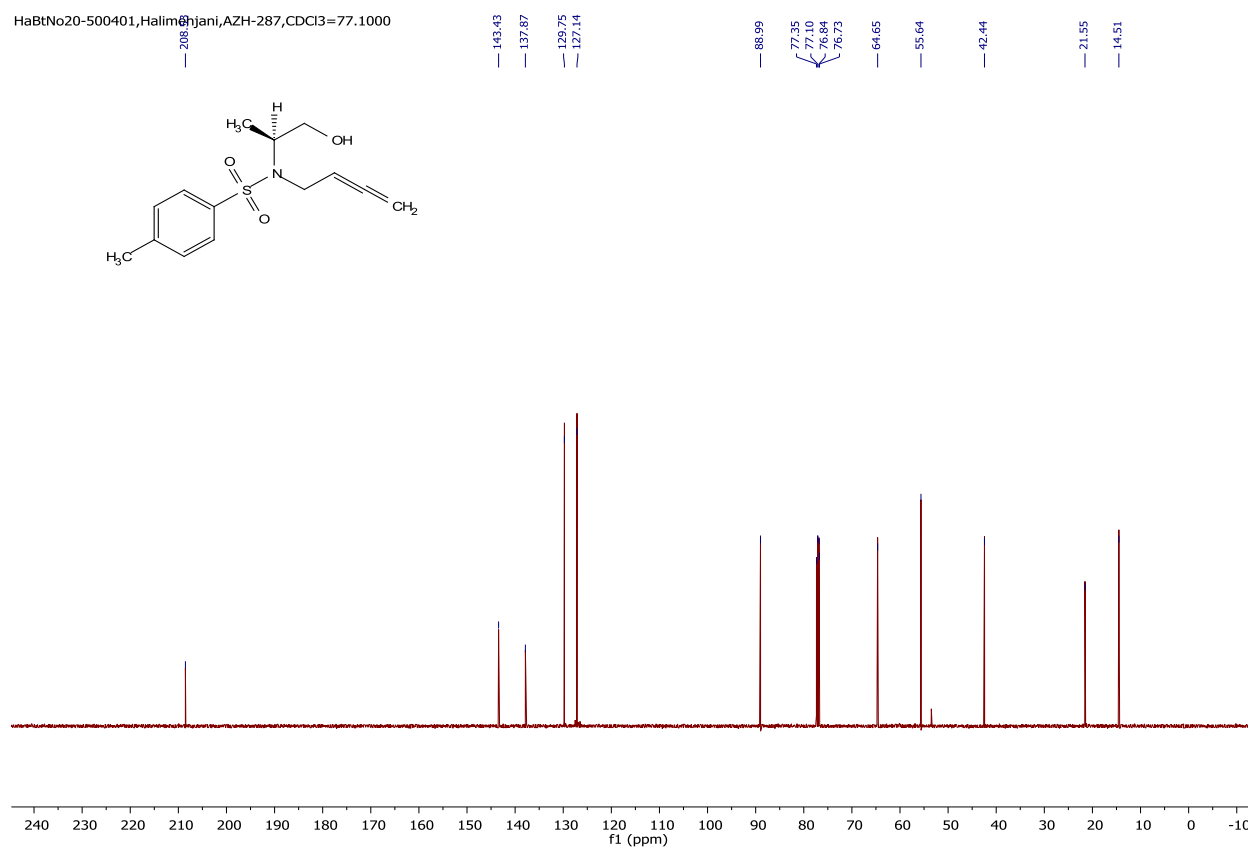

(S)-N-(buta-2,3-dien-1-yl)-N-(1-hydroxypropan-2-yl)-4-methylbenzenesulfonamide (**1c**): <sup>1</sup>H NMR (500 MHz, Chloroform-*d*) δ 7.75 (d, *J* = 8.4 Hz, 2H), 7.28 (d, *J* = 8.6, 2H), 5.26 (m, 1H), 4.80–4.72 (m, 2H), 3.98 (m, 1H), 3.82 – 3.69 (m, 2H), 3.69 – 3.46 (m, 2H), 2.42 (s, 3H), 1.89 (dd, *J* = 7.0, 5.3 Hz, 1H), 1.80 (m, 1H), 0.93 (d, *J* = 6.6 Hz, 3H), 0.70 (d, *J* = 6.7 Hz, 3H) ppm; <sup>13</sup>C NMR (126 MHz, CDCl<sub>3</sub>) δ 208.5, 143.4, 138.2, 129.6, 127.5, 88.5, 76.4, 66.6, 62.1, 43.3, 28.0, 21.6, 20.6, 20.3 ppm; HRMS (ESI) calcd for C<sub>16</sub>H<sub>24</sub>NO<sub>3</sub>S [M+H]<sup>+</sup>: 310.1477; found: 310.1475; [α]<sub>D</sub><sup>25</sup> = +7.06 (c = 1.232, CH<sub>2</sub>Cl<sub>2</sub>).

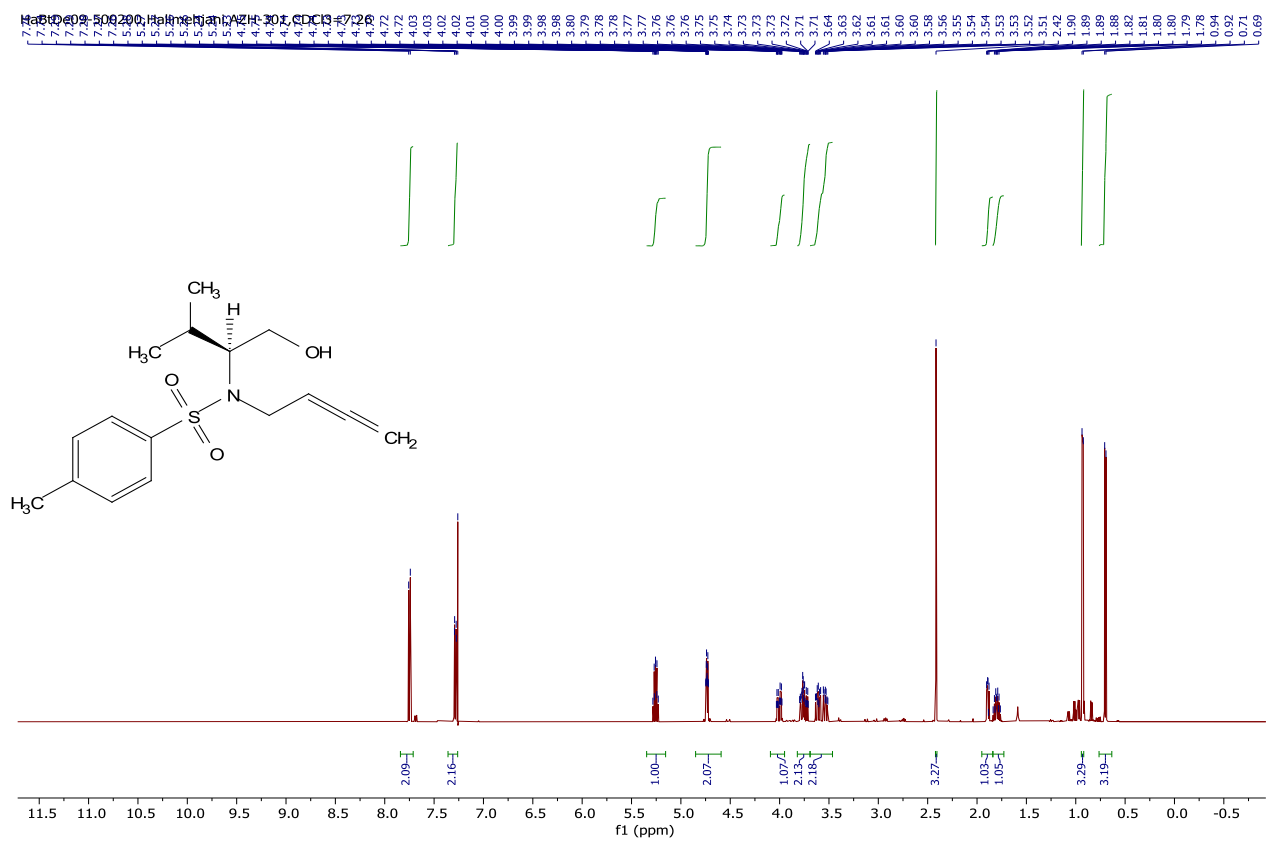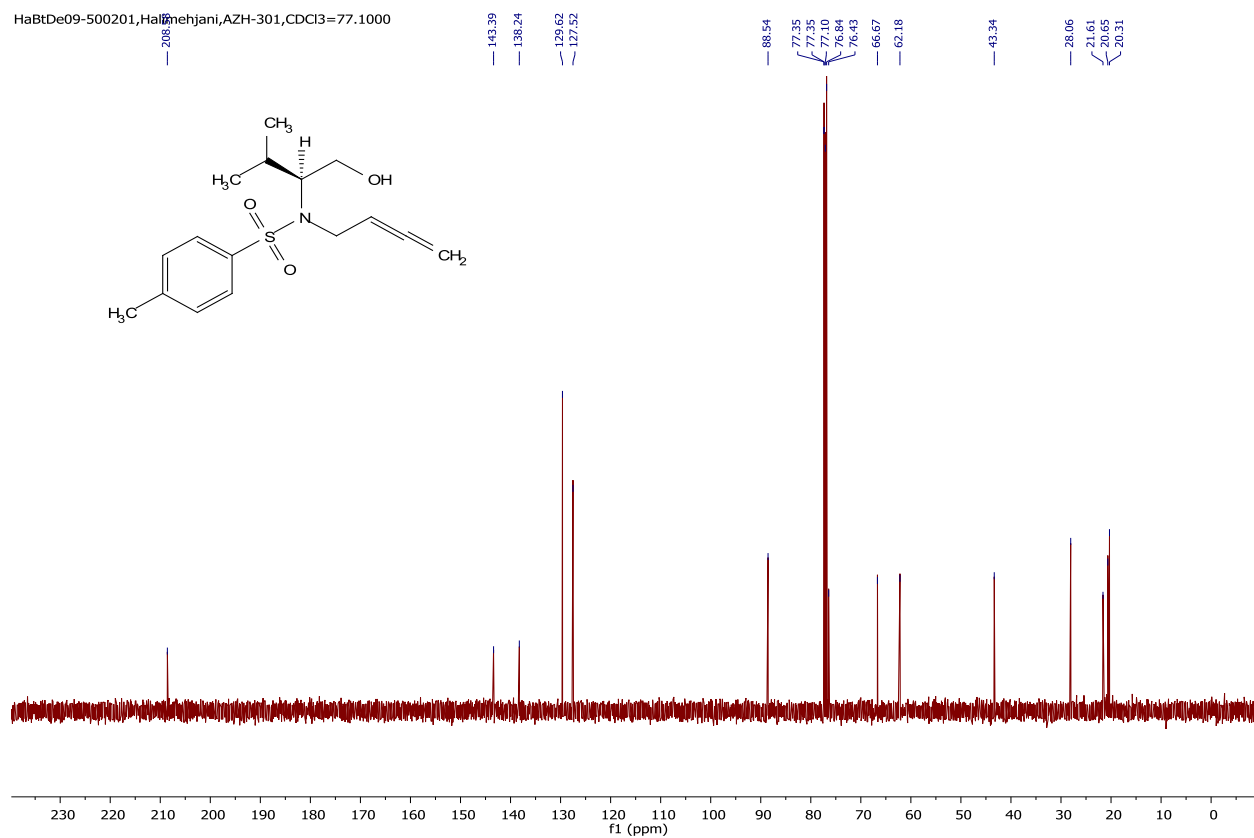



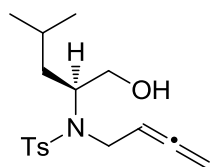

(*S*)-*N*-(buta-2,3-dien-1-yl)-*N*-(1-hydroxy-4-methylpentan-2-yl)-4-methylbenzenesulfonamide (**1d**):  $^1\text{H}$  NMR (500 MHz, Chloroform-*d*)  $\delta$  7.75 (d,  $J$  = 8.3 Hz, 2H), 7.28 (d,  $J$  = 8.3 Hz, 2H), 5.23 (m, 1H), 4.80–4.72 (m, 2H), 4.05 – 3.86 (m, 2H), 3.78 (m, 1H), 3.65 – 3.49 (m, 2H), 2.42 (s, 3H), 2.04 (dd,  $J$  = 6.9, 5.5 Hz, 1H), 1.40 (m, 1H), 1.32 – 1.05 (m, 2H), 0.78 (d,  $J$  = 6.6 Hz, 3H), 0.76 (d,  $J$  = 6.5 Hz, 3H) ppm;  $^{13}\text{C}$  NMR (126 MHz,  $\text{CDCl}_3$ )  $\delta$  208.5, 143.5, 137.9, 129.6, 127.4, 88.9, 76.6, 63.6, 58.3, 42.8, 38.4, 24.7, 22.6, 22.5, 21.5 ppm; HRMS (ESI) calcd for  $\text{C}_{17}\text{H}_{26}\text{NO}_3\text{S}$   $[\text{M}+\text{H}]^+$ : 324.1633; found: 324.1628;  $[\alpha]_{\text{D}}^{25} = +13.81$  ( $c = 0.905$ ,  $\text{CH}_2\text{Cl}_2$ ).

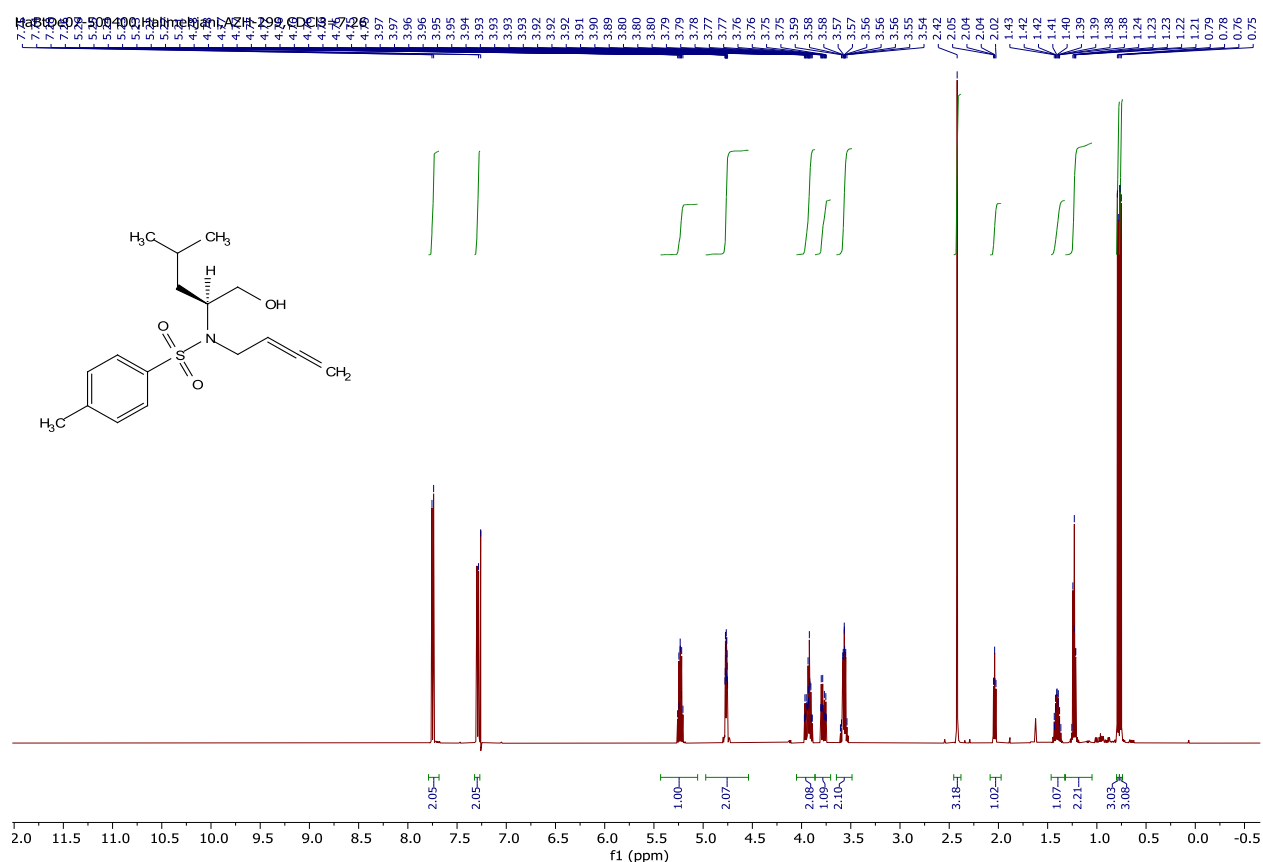

HaBtDe07-500401, Halimeh, AZH-299, CDCl<sub>3</sub>=77.1000

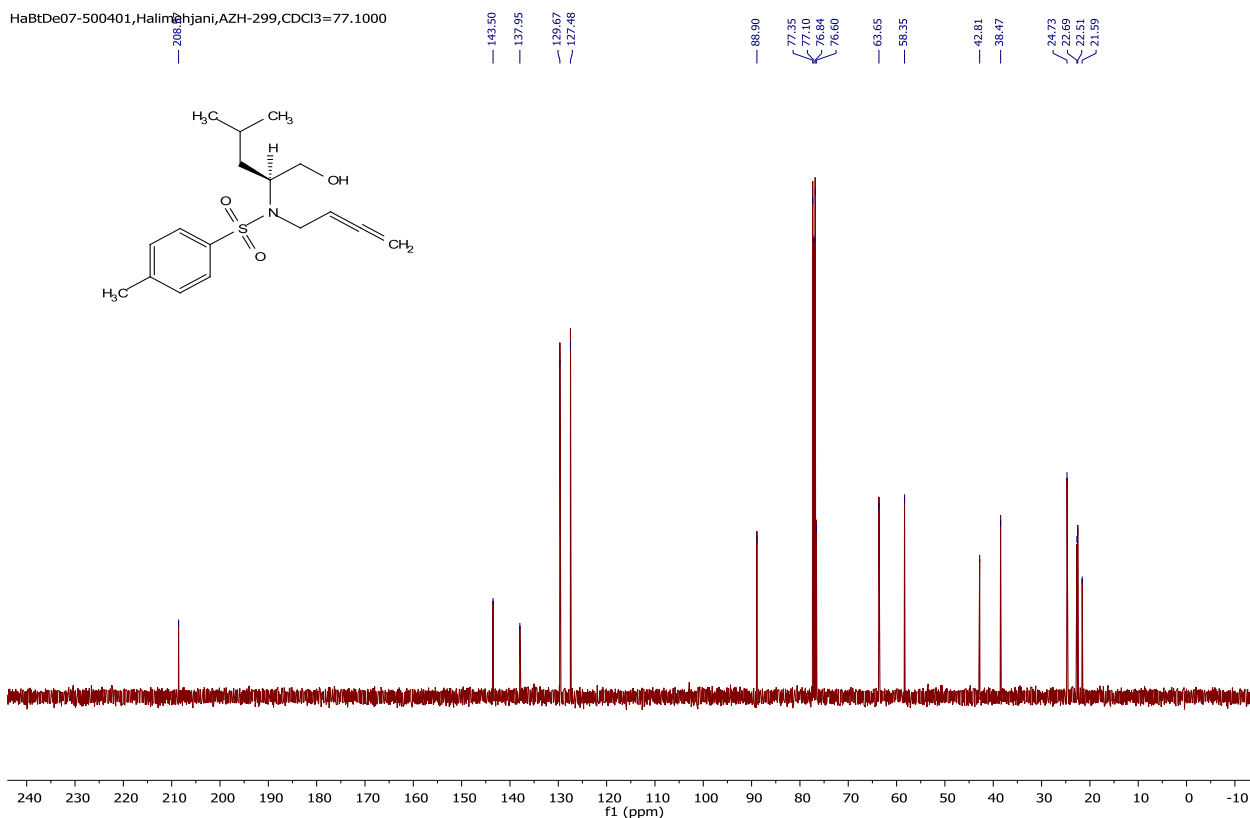

Chemical structure of (S)-N-(buta-2,3-dien-1-yl)-N-(1-hydroxy-3-phenylpropan-2-yl)-4-methylbenzenesulfonamide (1e):

CC1=CC=C(C=C1)S(=O)(=O)N(C=C)C[C@H](O)C[C@@H](C)C

(S)-N-(buta-2,3-dien-1-yl)-N-(1-hydroxy-3-phenylpropan-2-yl)-4-methylbenzenesulfonamide (**1e**): <sup>1</sup>H NMR (500 MHz, Chloroform-*d*) δ 7.63 (d, *J* = 8.4 Hz, 2H), 7.29 – 7.17 (m, 5H), 7.04 (dd, *J* = 7.9, 1.7 Hz, 2H), 5.27 (m, 1H), 4.84–4.80 (m, 2H), 4.18 – 3.96 (m, 2H), 3.87 (m, 1H), 3.74 – 3.53 (m, 2H), 2.85 – 2.62 (m, 2H), 2.40 (s, 3H), 1.99 (brs, 1H, OH) ppm; <sup>13</sup>C NMR (126 MHz, CDCl<sub>3</sub>) δ 208.6, 143.4, 137.7, 137.6, 129.7, 129.0, 128.6, 127.3, 126.6, 88.8, 76.7, 62.5, 61.9, 43.5, 36.3, 21.5 ppm; HRMS (ESI) calcd for C<sub>20</sub>H<sub>23</sub>NO<sub>3</sub>S [M+H]<sup>+</sup>: 358.1477; found: 358.1473; [α]<sub>D</sub><sup>25</sup> = -35.95 (c = 1.038, CH<sub>2</sub>Cl<sub>2</sub>).

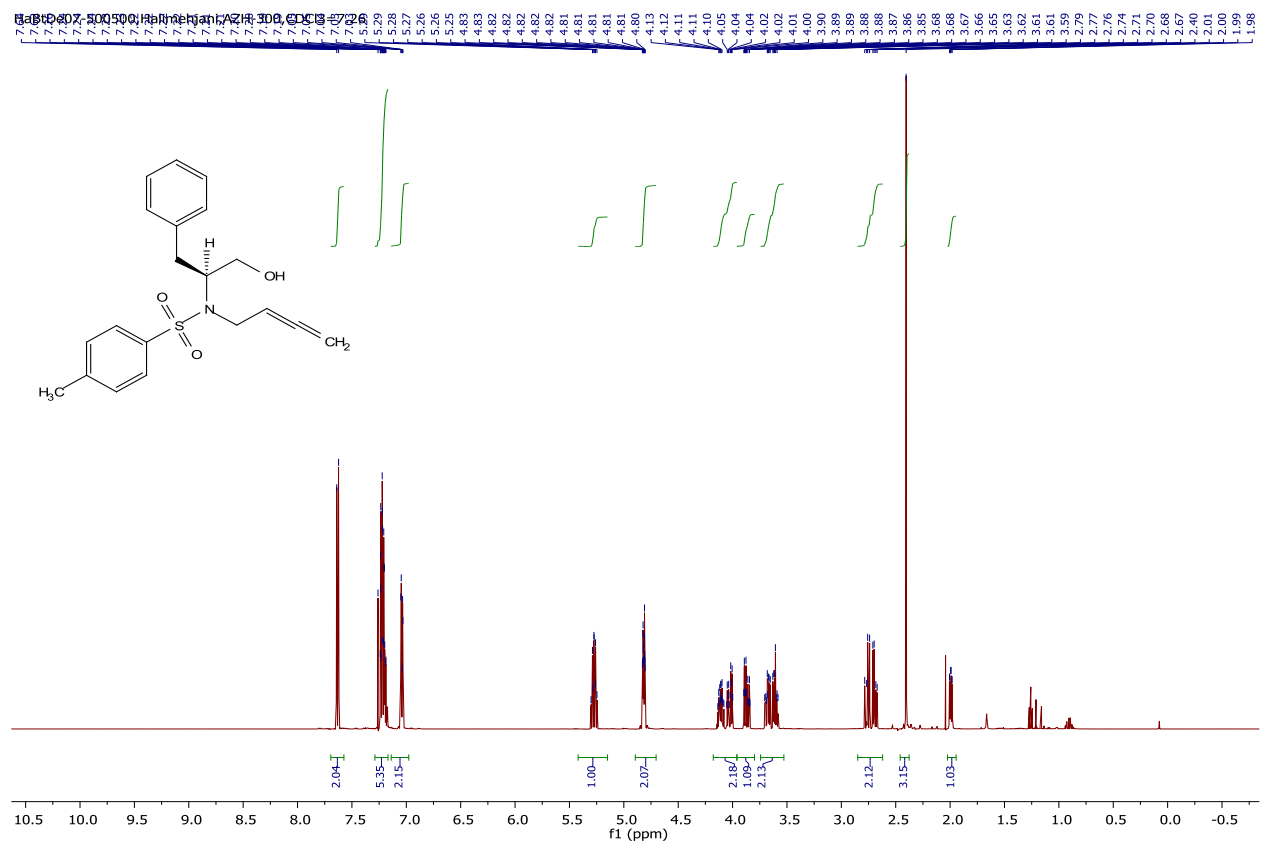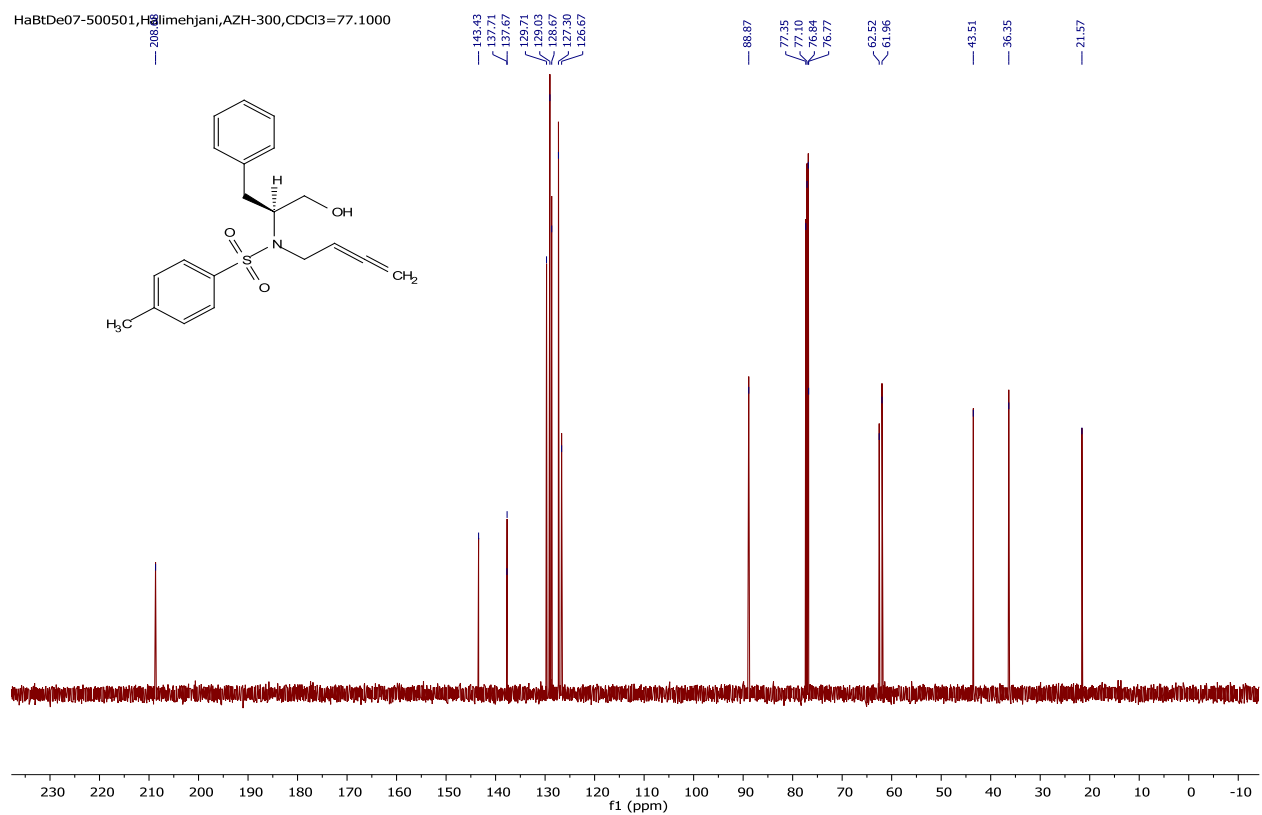

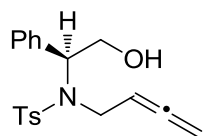

(*S*)-*N*-(buta-2,3-dien-1-yl)-*N*-(2-hydroxy-1-phenylethyl)-4-methylbenzenesulfonamide (**1f**):  $^1\text{H}$  NMR (400 MHz, Chloroform-*d*)  $\delta$  7.74 (d,  $J$  = 8.4 Hz, 2H), 7.35 – 7.20 (m, 5H), 7.10 – 6.98 (m, 2H), 5.20 – 4.96 (m, 2H), 4.85 – 4.57 (m, 2H), 4.19 – 3.94 (m, 3H), 3.58 (m, 1H), 2.44 (s, 3H), 2.10 (t,  $J$  = 6.3 Hz, 1H) ppm;  $^{13}\text{C}$  NMR (101 MHz,  $\text{CDCl}_3$ )  $\delta$  208.5, 143.5, 138.1, 135.8, 129.7, 128.7, 128.3, 128.2, 127.5, 88.6, 76.5, 62.5, 62.4, 43.7, 21.6 ppm; HRMS (ESI) calcd for  $\text{C}_{19}\text{H}_{21}\text{NO}_3\text{S}$   $[\text{M}+\text{H}]^+$ : 344.1320; found: 344.1318;  $[\alpha]_{\text{D}}^{25}$  = 77.40 (c = 0.717,  $\text{CH}_2\text{Cl}_2$ ).

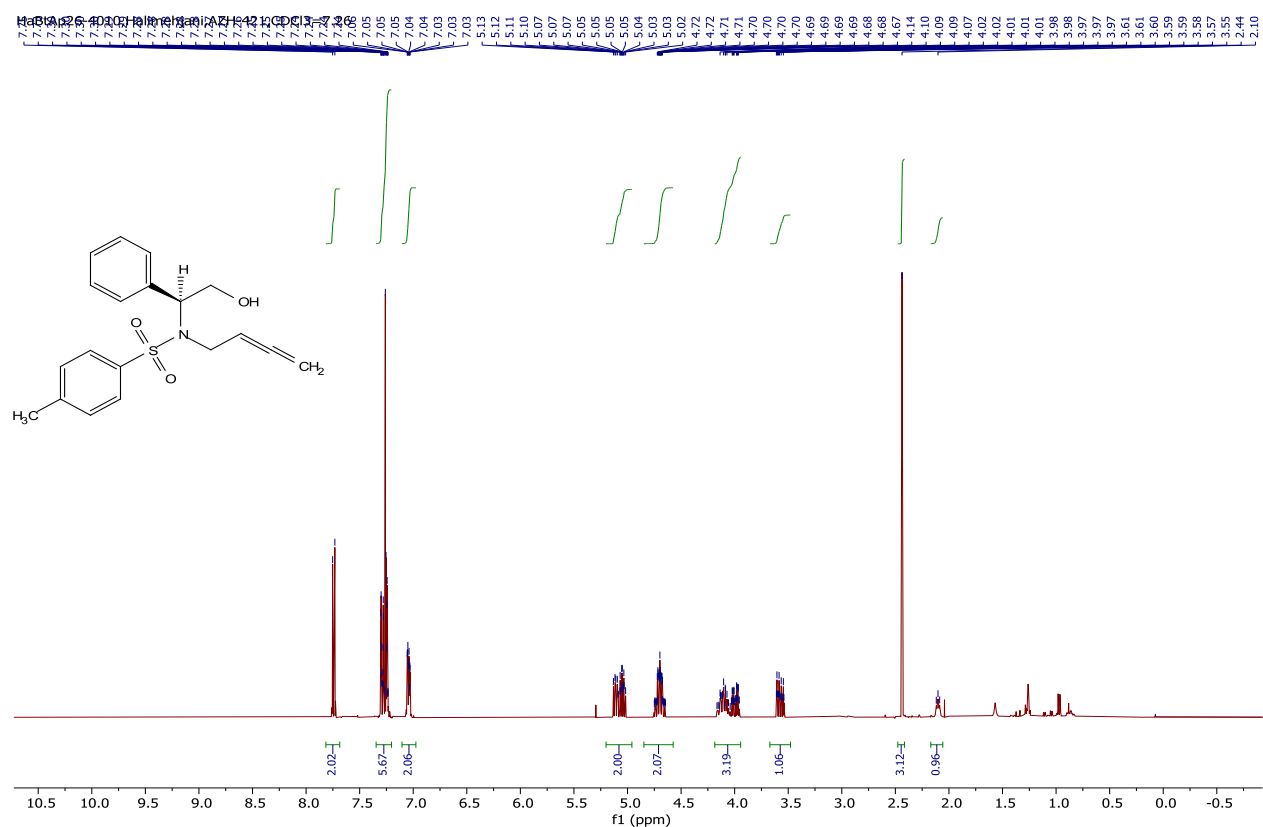

HaBtAp26-4011, Halimehjan, AZH-421, CDCl<sub>3</sub>=77.1000

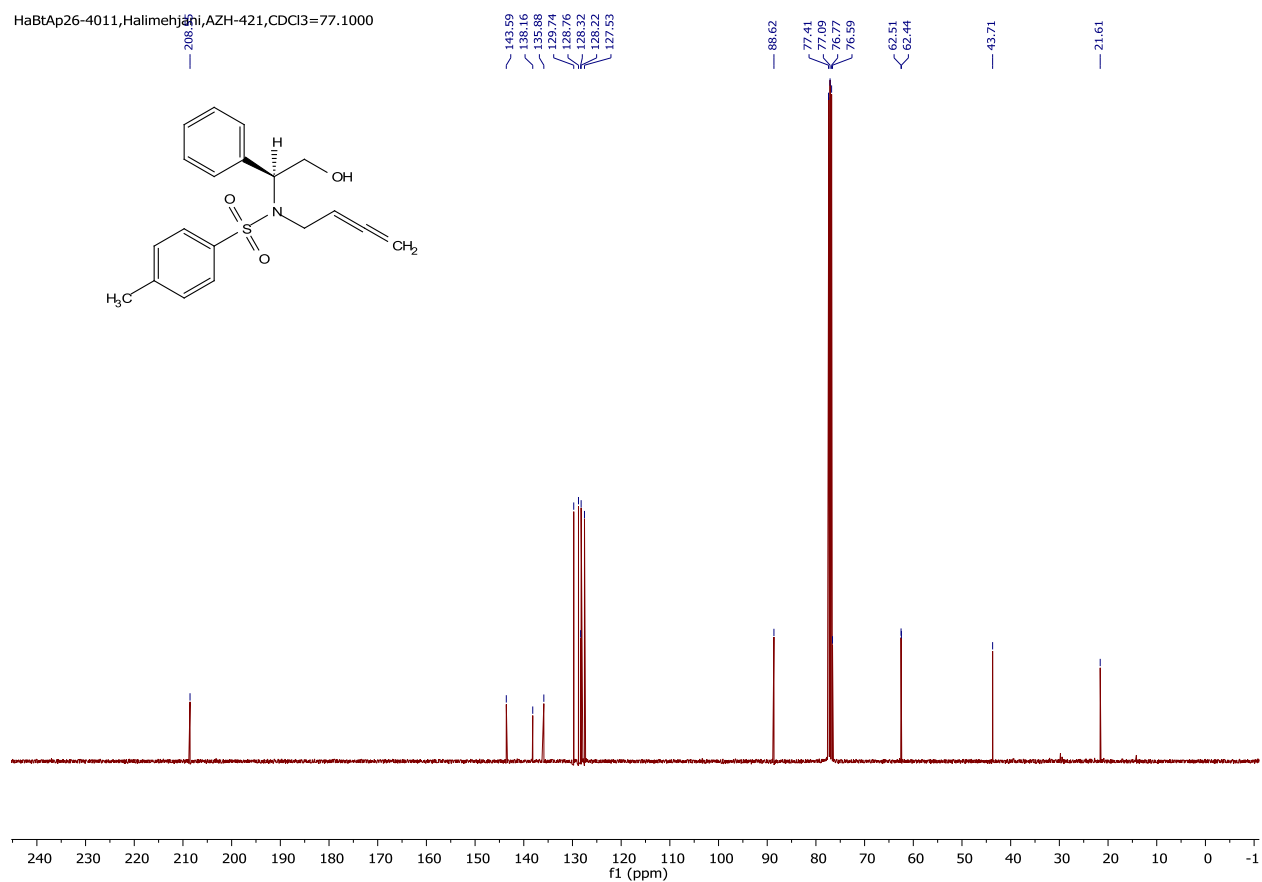

*(R)*-N-(1-(benzylthio)-3-hydroxypropan-2-yl)-N-(buta-2,3-dien-1-yl)-4-methylbenzenesulfonamide (**1g**): <sup>1</sup>H NMR (500 MHz, Chloroform-*d*) δ 7.73 (d, *J* = 8.3 Hz, 2H), 7.32 – 7.25 (m, 7H), 5.18 (m, 1H), 4.74–4.70 (m, 2H), 4.03 – 3.86 (m, 2H), 3.84 – 3.75 (m, 2H), 3.70 (m, 1H), 3.63 (s, 2H), 2.61 – 2.49 (m, 2H), 2.42 (s, 3H), 1.86 (dd, *J* = 7.1, 5.5 Hz, 1H) ppm; <sup>13</sup>C NMR (126 MHz, CDCl<sub>3</sub>) δ 208.6, 143.7, 137.8, 137.7, 129.7, 128.9, 128.6, 127.4, 127.2, 88.6, 76.8, 62.9, 59.5, 43.8, 36.5, 31.2, 21.6 ppm; HRMS (ESI) calcd for C<sub>21</sub>H<sub>25</sub>NO<sub>3</sub>S<sub>2</sub> [M+Na]<sup>+</sup>: 426.1174; found: 426.1168; [α]<sub>D</sub><sup>25</sup> = +7.35 (c = 0.87, CH<sub>2</sub>Cl<sub>2</sub>).

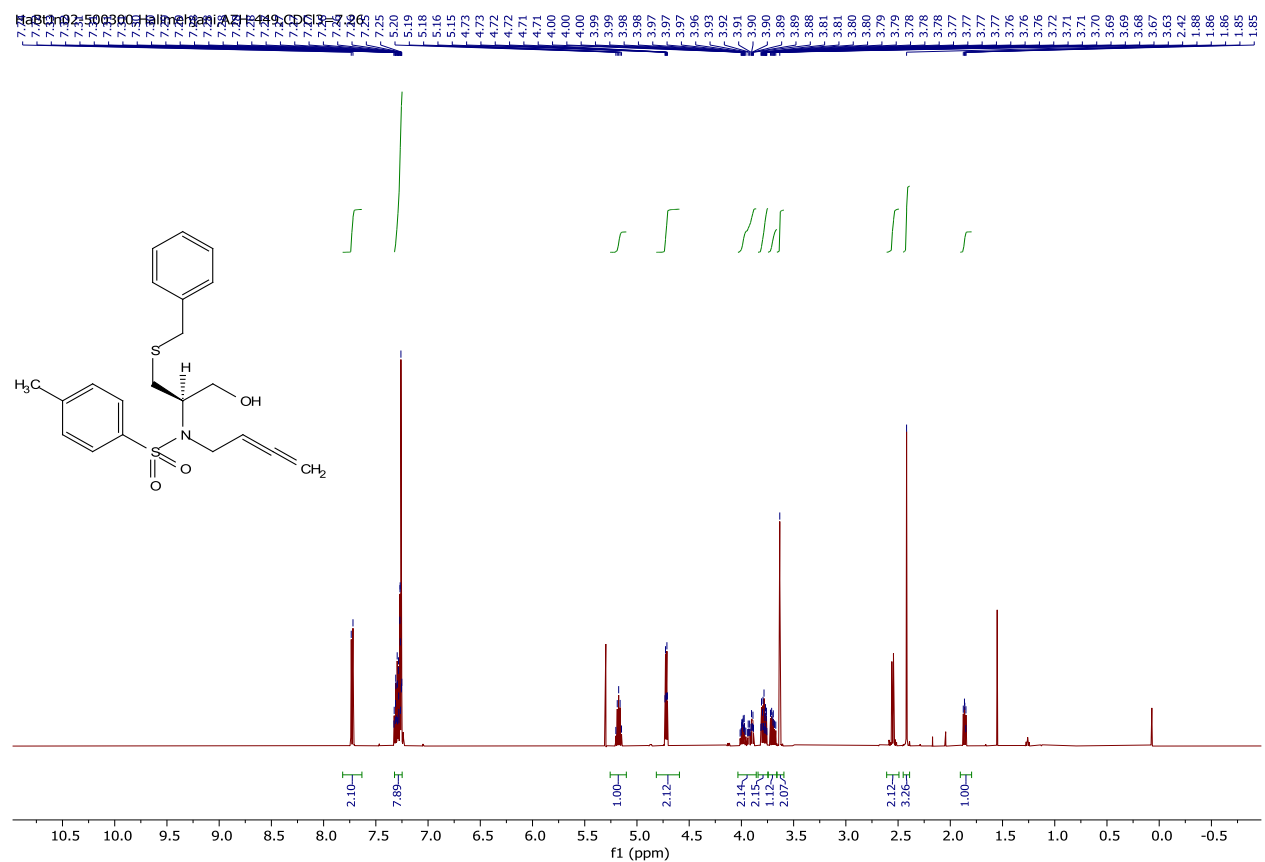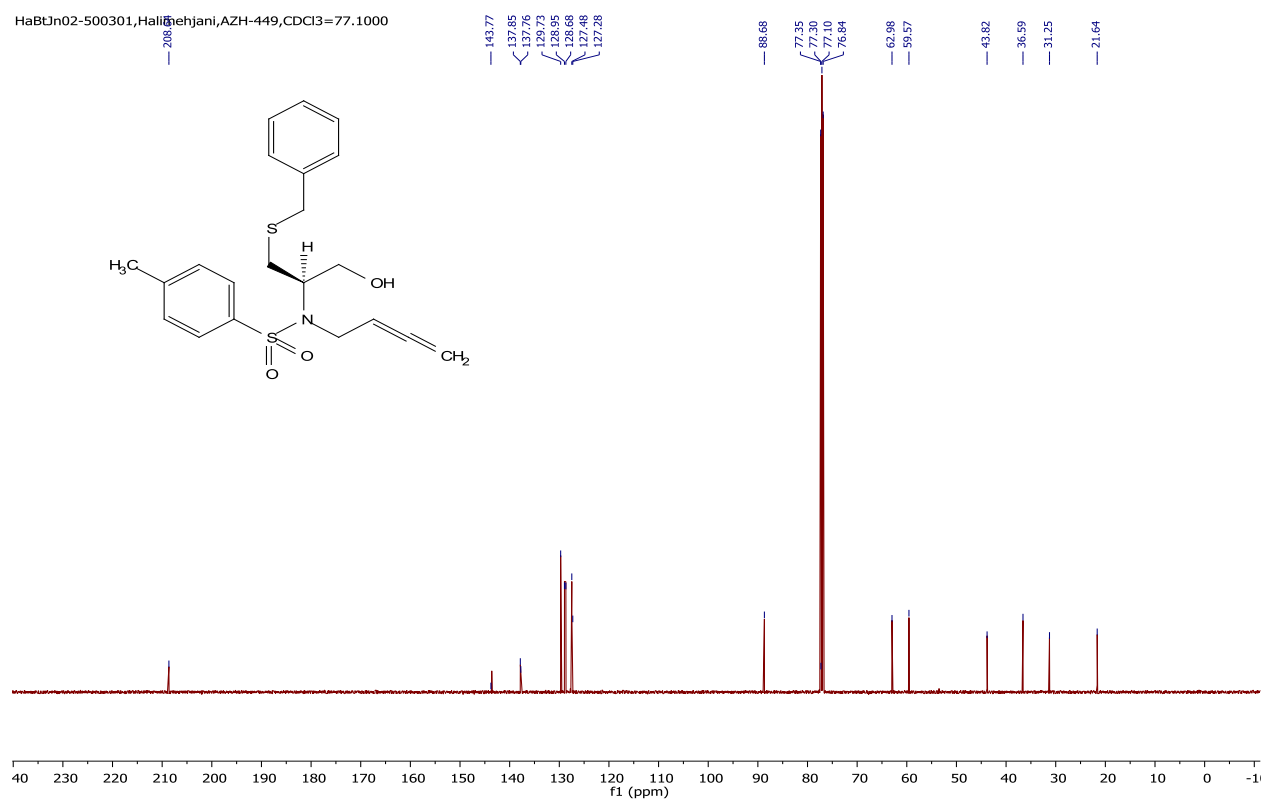

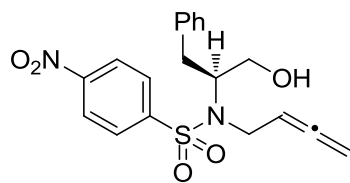

(*S*)-*N*-(buta-2,3-dien-1-yl)-*N*-(1-hydroxy-3-phenylpropan-2-yl)-4-nitrobenzenesulfonamide (**1h**):  $^1\text{H}$  NMR (400 MHz, Chloroform-*d*)  $\delta$  8.14 (d,  $J = 9.0$  Hz, 2H), 7.76 (d,  $J = 9.0$  Hz, 2H), 7.24 – 7.12 (m, 3H), 7.10 – 7.00 (m, 2H), 5.27 (m, 1H), 4.86–4.80 (m, 2H), 4.23 (m, 1H), 4.10 – 3.87 (m, 2H), 3.84 – 3.62 (m, 2H), 2.97 – 2.64 (m, 2H), 1.84 (t,  $J = 5.8$  Hz, 1H) ppm;  $^{13}\text{C}$  NMR (101 MHz,  $\text{CDCl}_3$ )  $\delta$  208.8, 149.7, 146.4, 137.4, 129.0, 128.8, 128.3, 126.9, 124.0, 88.5, 77.0, 63.0, 62.6, 43.5, 36.3 ppm; HRMS (ESI) calcd for  $\text{C}_{19}\text{H}_{20}\text{N}_2\text{O}_5\text{S}$  [ $\text{M}-\text{H}$ ] $^-$ : 387.1015; found: 387.1021;  $[\alpha]_{\text{D}}^{25} = -4.58$  ( $c = 0.655$ ,  $\text{CH}_2\text{Cl}_2$ ).

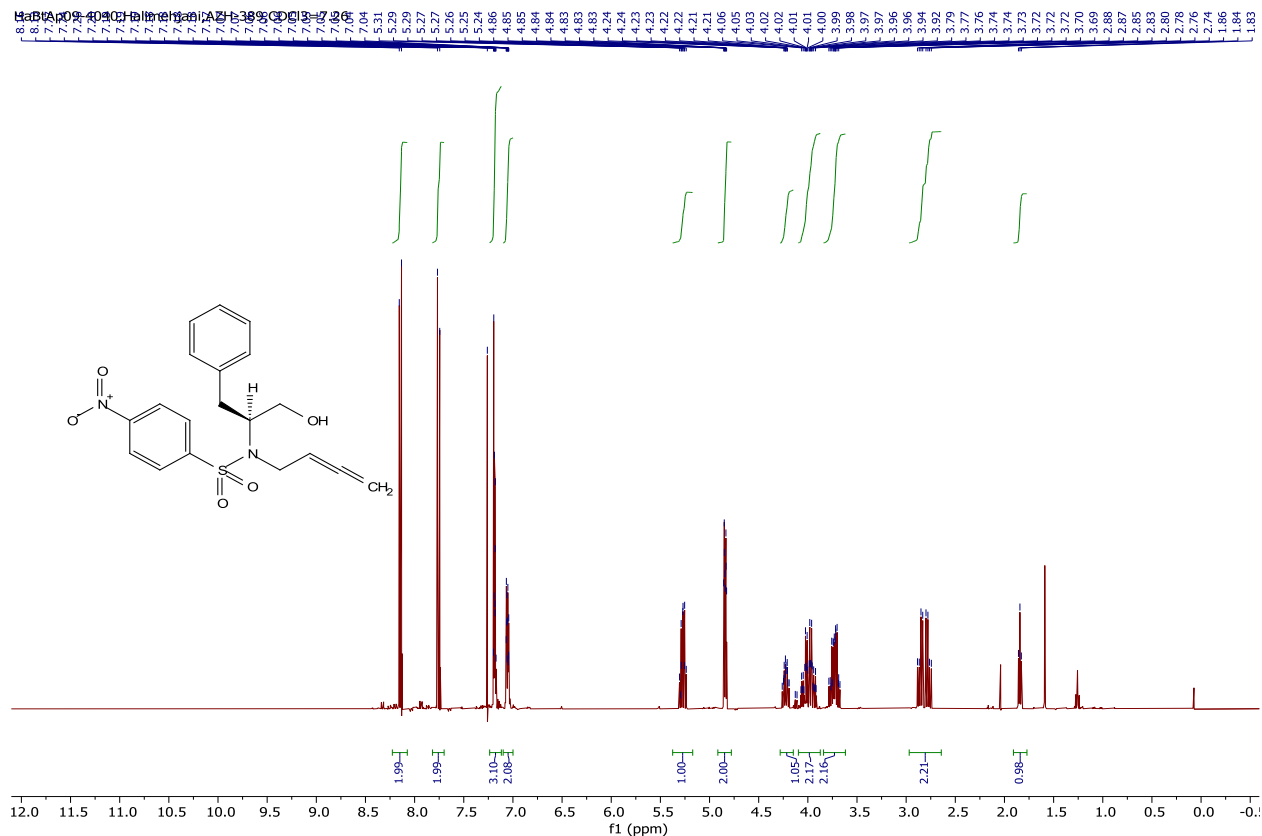

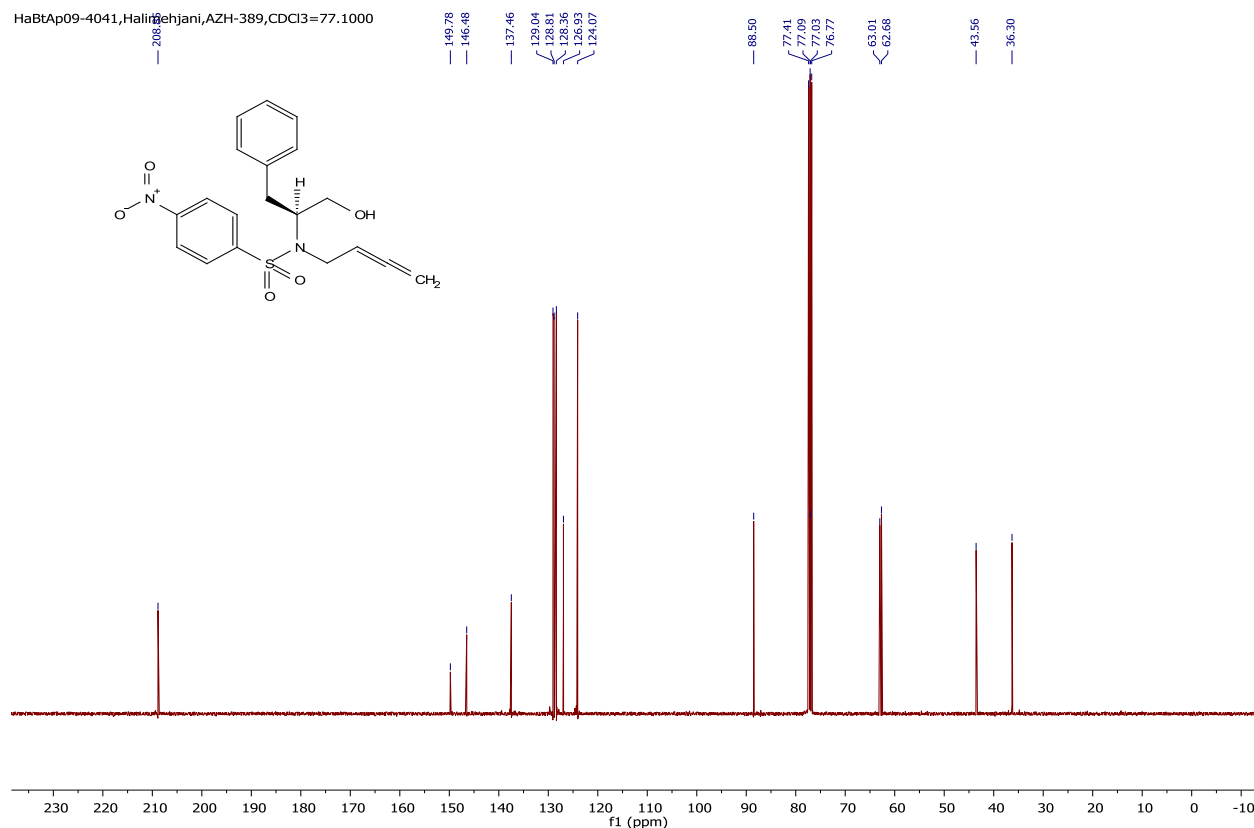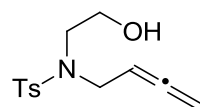

*N*-(buta-2,3-dien-1-yl)-*N*-(2-hydroxyethyl)-4-methylbenzenesulfonamide

(1k): <sup>1</sup>H NMR (400 MHz, Chloroform-*d*) δ 7.70 (d, *J* = 8.4 Hz, 2H), 7.29 (d, *J* = 7.7 Hz, 2H), 4.96 (p, *J* = 6.8 Hz, 1H), 4.72–4.69 (m, 2H), 3.88 (dt, *J* = 7.0, 2.6 Hz, 2H), 3.75 (t, *J* = 5.5 Hz, 2H), 3.29 (t, *J* = 5.5 Hz, 2H), 2.41 (s, 3H), 2.39 (brs, 1H, OH) ppm; <sup>13</sup>C NMR (101 MHz, CDCl<sub>3</sub>) δ 209.4, 143.6, 136.6, 129.8, 127.3, 86.1, 76.5, 60.8, 49.6, 48.1, 21.5 ppm; HRMS (ESI) calcd for C<sub>13</sub>H<sub>17</sub>NO<sub>3</sub>S [M+H]<sup>+</sup>: 268.1007; found: 268.1002.



HaBtNo17-4260, Halimehjani, AZH-282, CDCl<sub>3</sub>-7.26

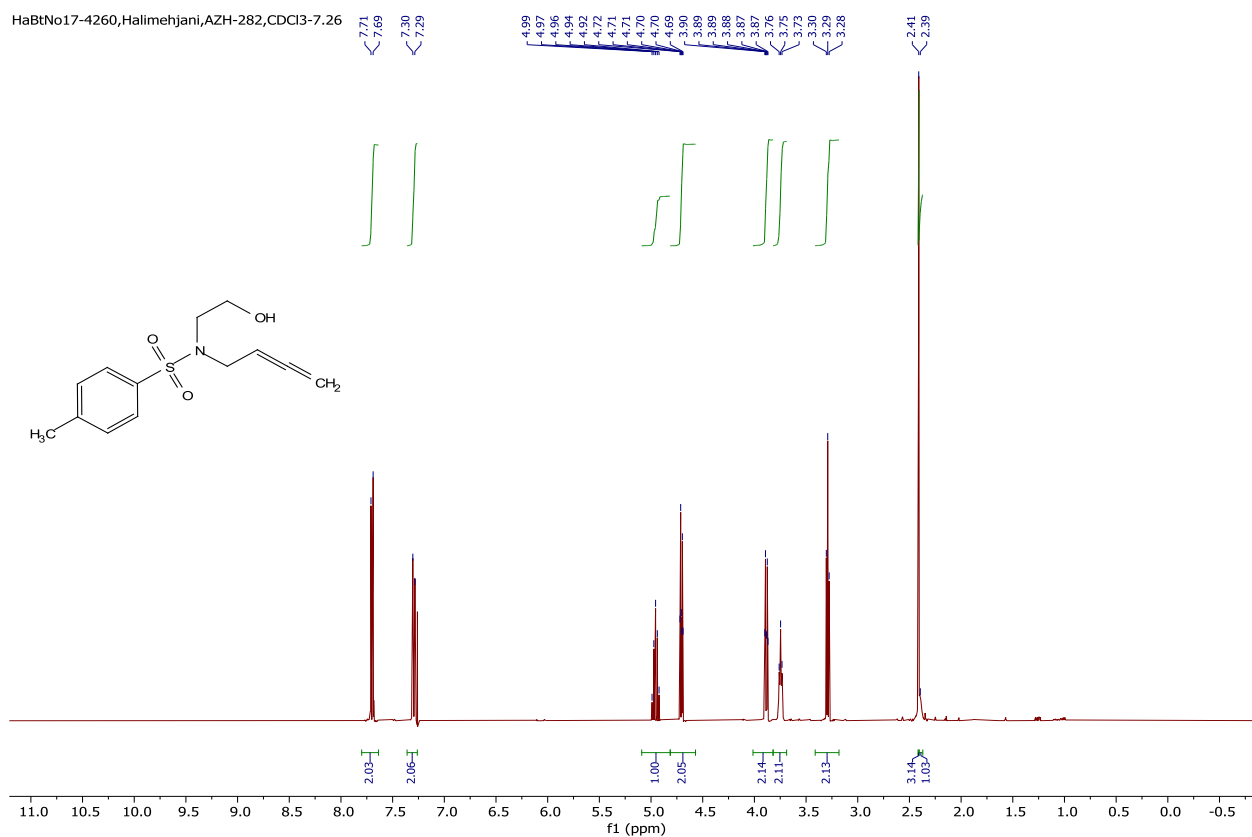

HaBtNo17-4261, Halimehjani, AZH-282, CDCl<sub>3</sub>=77.1000

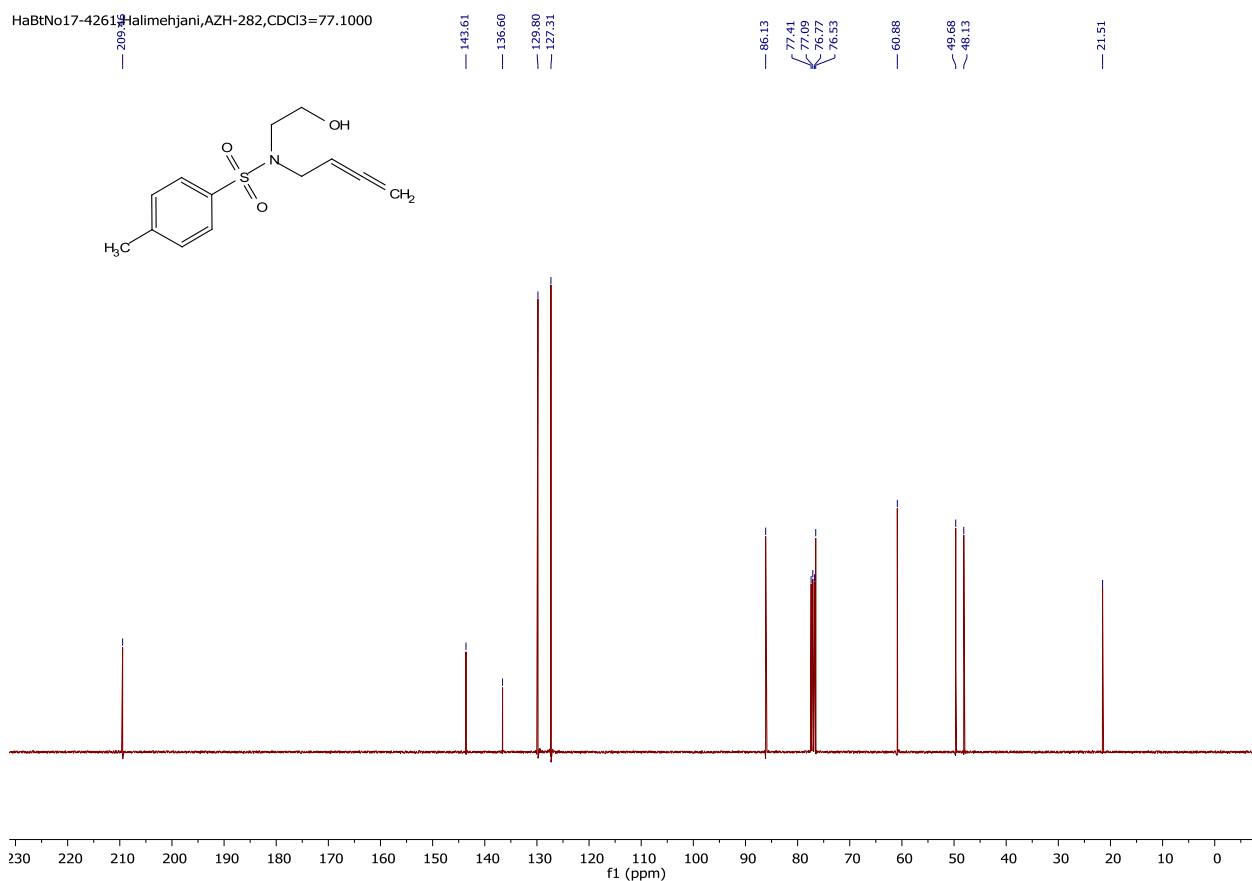

## Synthesis of (L)-Serine and (L)-threonine-based allenols 1i and 3h

(L)-Serine and (L)-threonine-based allenols were prepared according to the following reaction Scheme:

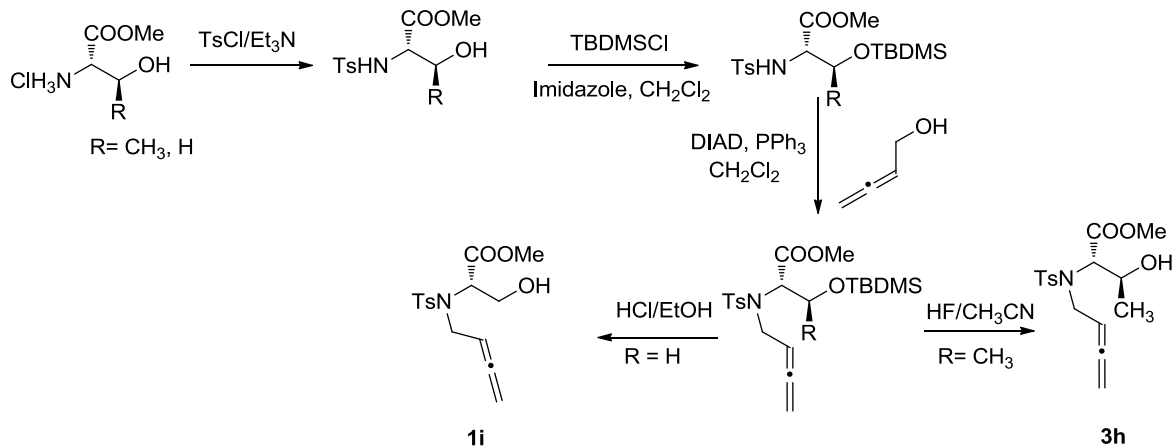

**Tosylation of (L)-serine methyl ester hydrochloride and (L)-threonine methyl ester hydrochloride:** (L)-serine methyl ester hydrochloride or (L)-threonine methyl ester hydrochloride (1 equiv) was dissolved in dry CH<sub>2</sub>Cl<sub>2</sub> (1.8 mL/mmol), cooled to 0 °C and triethylamine (2.4 equiv) was added under argon and the reaction stirred for 5 min. Then, tosyl chloride (1.1 equiv) was added and the mixture was stirred for 2h at the same temperature. After that the reaction mixture was allowed to warm to RT and further stirred for 12 h. The reaction was quenched with water (4 mL/mmol) and extracted with CH<sub>2</sub>Cl<sub>2</sub> (3 × 6 mL/mmol). The combined organic layers were washed with sat. NaHCO<sub>3</sub> (3 mL/mmol), 10% citric acid (3 mL/mmol), water (3 mL/mmol), and brine (3 mL/mmol). The organic phase was dried over Na<sub>2</sub>SO<sub>4</sub>, filtered, concentrated under vacuum and washed with diethyl ether to give the pure tosylated product in almost quantitative yield.

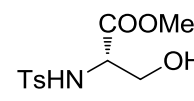 (*S*)-methyl 3-hydroxy-2-(4-methylphenylsulfonamido)propanoate: <sup>1</sup>H NMR (500 MHz, Chloroform-*d*) δ 7.74 (d, *J* = 8.4 Hz, 2H), 7.28 (d, *J* = 7.7 Hz, 2H), 5.91 (brs, 1H), 3.99 (t, *J* = 3.8 Hz, 1H), 3.95 – 3.78 (m, 2H), 3.58 (s, 3H), 2.89 (brs, 1H), 2.40 (s, 3H) ppm; <sup>13</sup>C NMR (126 MHz, CDCl<sub>3</sub>) δ 170.2, 143.8, 136.5, 129.7, 127.2, 63.6, 57.7, 52.9, 21.5 ppm; HRMS (ESI) calcd for C<sub>11</sub>H<sub>15</sub>NO<sub>5</sub>S [M+H]<sup>+</sup>: 274.0749; found: 274.0746. [ $\alpha$ ]<sub>D</sub><sup>25</sup> = -10.0 (c = 0.08, CH<sub>2</sub>Cl<sub>2</sub>).

HaBtMz17-500101, Halimehjani, AZH-363, CDCl<sub>3</sub> = 77.1000

170.35  
143.87  
136.59  
129.77  
127.23

77.35  
77.10  
76.84

63.67  
57.70  
52.90

21.57

Chemical structure: COC(=O)[C@H](NS(=O)(=O)c1ccc(C)cc1)CO

13C NMR spectrum (CDCl<sub>3</sub>) showing peaks at: 170.35, 143.87, 136.59, 129.77, 127.23, 77.35, 77.10, 76.84, 63.67, 57.70, 52.90, and 21.57 ppm.

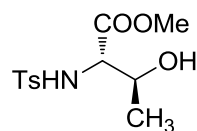

(2*S*,3*S*)-methyl 3-hydroxy-2-(4-methylphenylsulfonamido)butanoate:  $^1\text{H}$  NMR (500 MHz, Chloroform-*d*)  $\delta$  7.72 (d,  $J$  = 8.4 Hz, 2H), 7.28 (d,  $J$  = 7.8 Hz, 2H), 5.60 (d,  $J$  = 8.9 Hz, 1H), 4.22 – 4.07 (m, 1H), 3.82 (dd,  $J$  = 8.9, 3.1 Hz, 1H), 3.51 (s, 3H), 2.41 (s, 3H), 2.32 (s, 1H), 1.26 (d,  $J$  = 6.4 Hz, 3H) ppm;  $^{13}\text{C}$  NMR (126 MHz,  $\text{CDCl}_3$ )  $\delta$  170.7, 143.7, 136.8, 129.6, 127.3, 68.4, 61.0, 52.6, 21.6, 19.8 ppm; HRMS (ESI) calcd for  $\text{C}_{12}\text{H}_{17}\text{NO}_5\text{S}$   $[\text{M}+\text{H}]^+$ : 288.0898; found: 288.0906;  $[\alpha]_{\text{D}}^{25}$  = -8.57 ( $c$  = 0.28,  $\text{CH}_2\text{Cl}_2$ ).

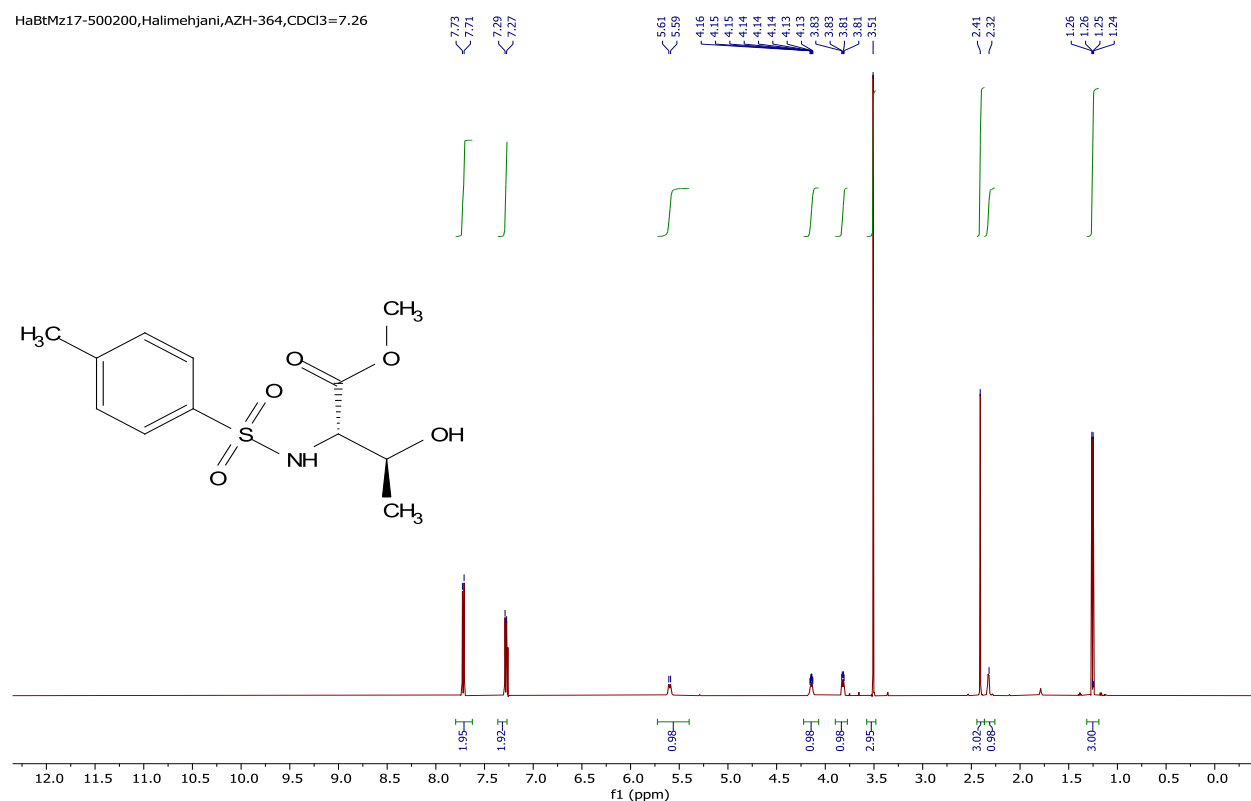

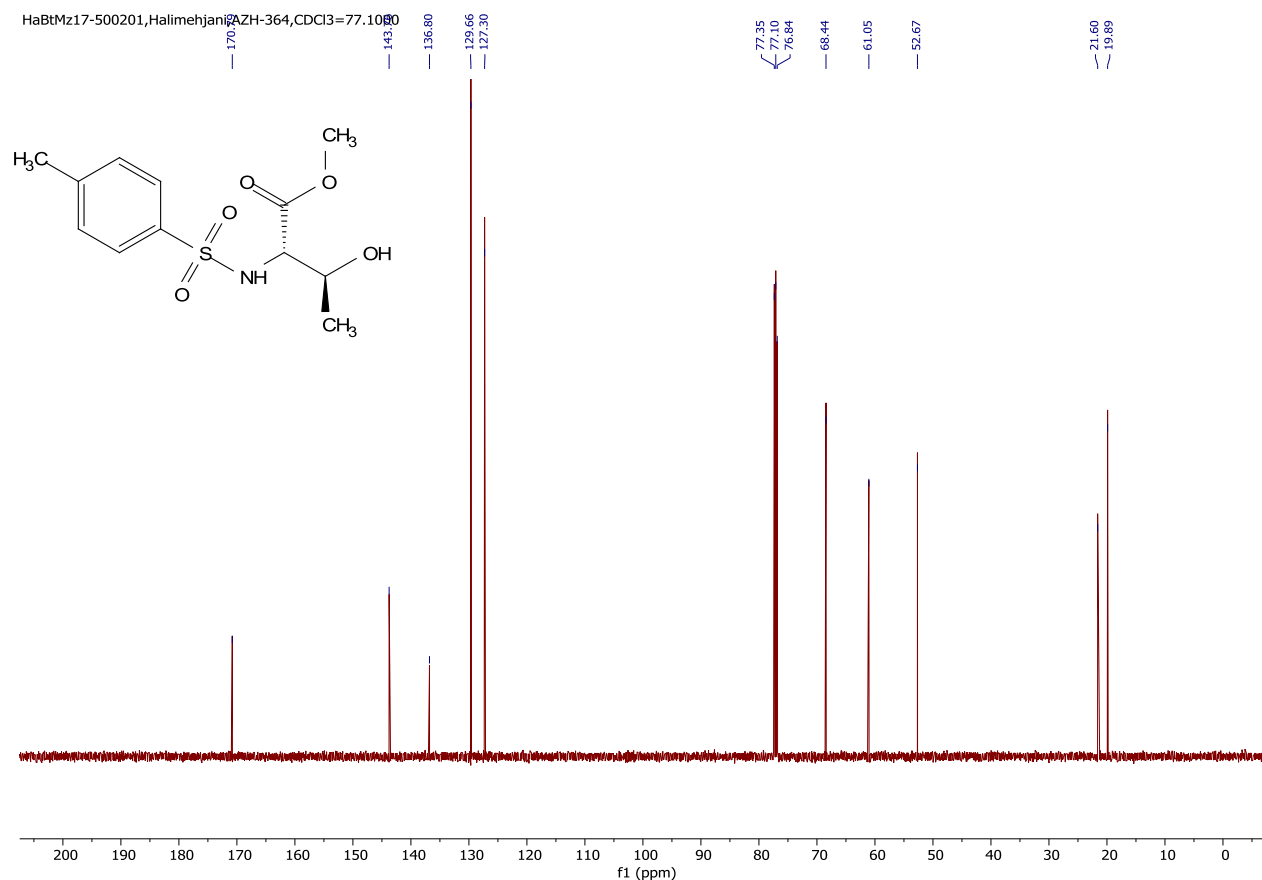

**Silylation reaction:** *tert*-Butyldimethylchlorosilane (1.2 equiv) was added portion wise to a solution of an alcohol and imidazole (1.2 equiv) in dichloromethane (4 mL/mmol), and the mixture was stirred at rt for 4 h. The reaction was quenched with water and the organic phase was separated. The aqueous phase was extracted two more times with CH<sub>2</sub>Cl<sub>2</sub> (2 × 3 mL/mmol). The combined organic phases was dried with MgSO<sub>4</sub> and concentrated in vacuum to give the pure product.<sup>4</sup>

CC(C)(C)Si(C)COC[C@H](C(=O)OC)Nc1ccc(C)cc1
  
*(S)*-methyl 3-((*tert*-butyldimethylsilyl)oxy)-2-(4-methylphenylsulfonamido)propanoate: <sup>1</sup>H NMR (400 MHz, Chloroform-*d*) δ 7.72 (d, *J* = 8.4 Hz, 2H), 7.37 – 7.17 (m, 2H), 5.36 (d, *J* = 8.9 Hz, 1H), 4.04–4.00 (m, 1H), 3.94 (dd, *J* = 10.0, 3.0 Hz, 1H), 3.76 (dd, *J* = 10.0, 3.5 Hz, 1H), 3.54 (s, 3H), 2.41 (s, 3H), 0.82 (s, 9H), -0.00 (s, 3H), -0.02 (s, 3H) ppm; <sup>13</sup>C NMR (101 MHz, CDCl<sub>3</sub>) δ 170.1, 143.6, 137.3, 129.6, 127.2, 64.5, 57.6, 52.4, 25.7, 21.5, 18.1, -5.4, -5.6 ppm; HRMS (ESI) calcd for C<sub>17</sub>H<sub>29</sub>NO<sub>5</sub>SSi [M+H]<sup>+</sup>: 388.1614; found: 388.1612; [α]<sub>D</sub><sup>25</sup> = +6.875 (c = 0.48, CH<sub>2</sub>Cl<sub>2</sub>).

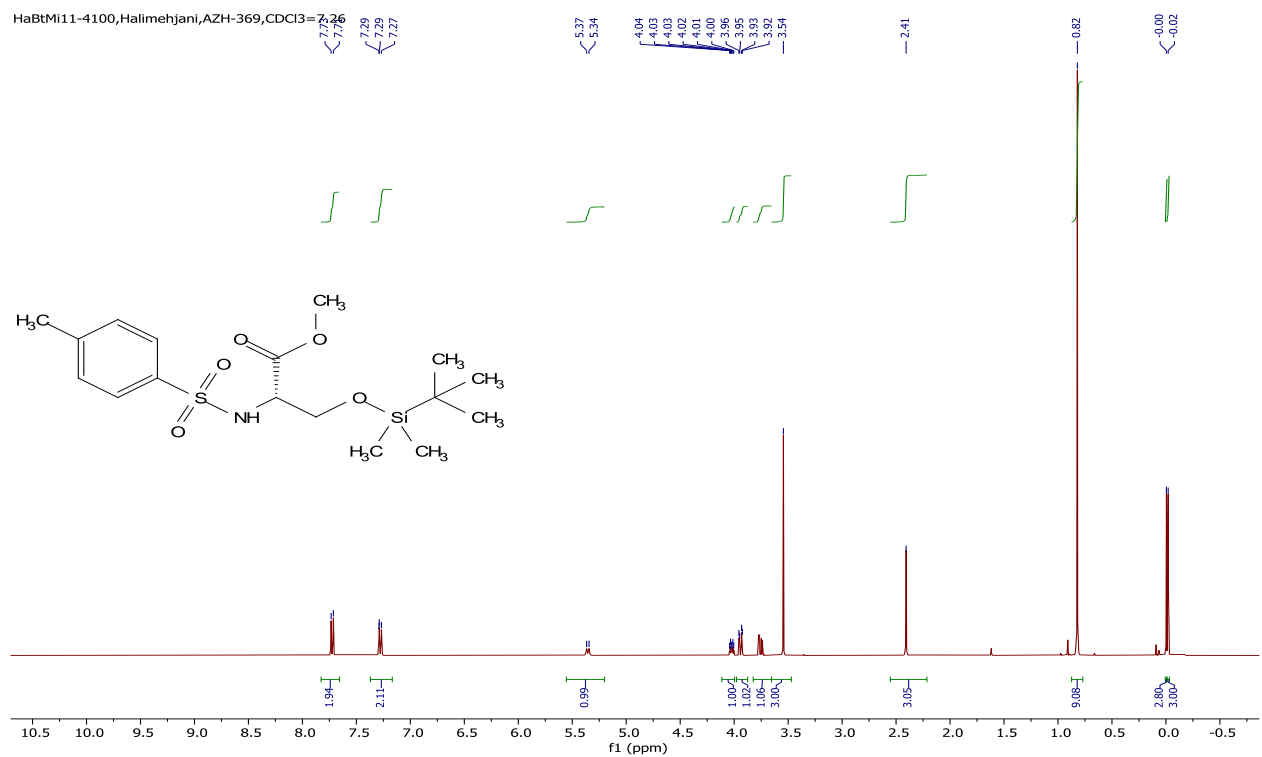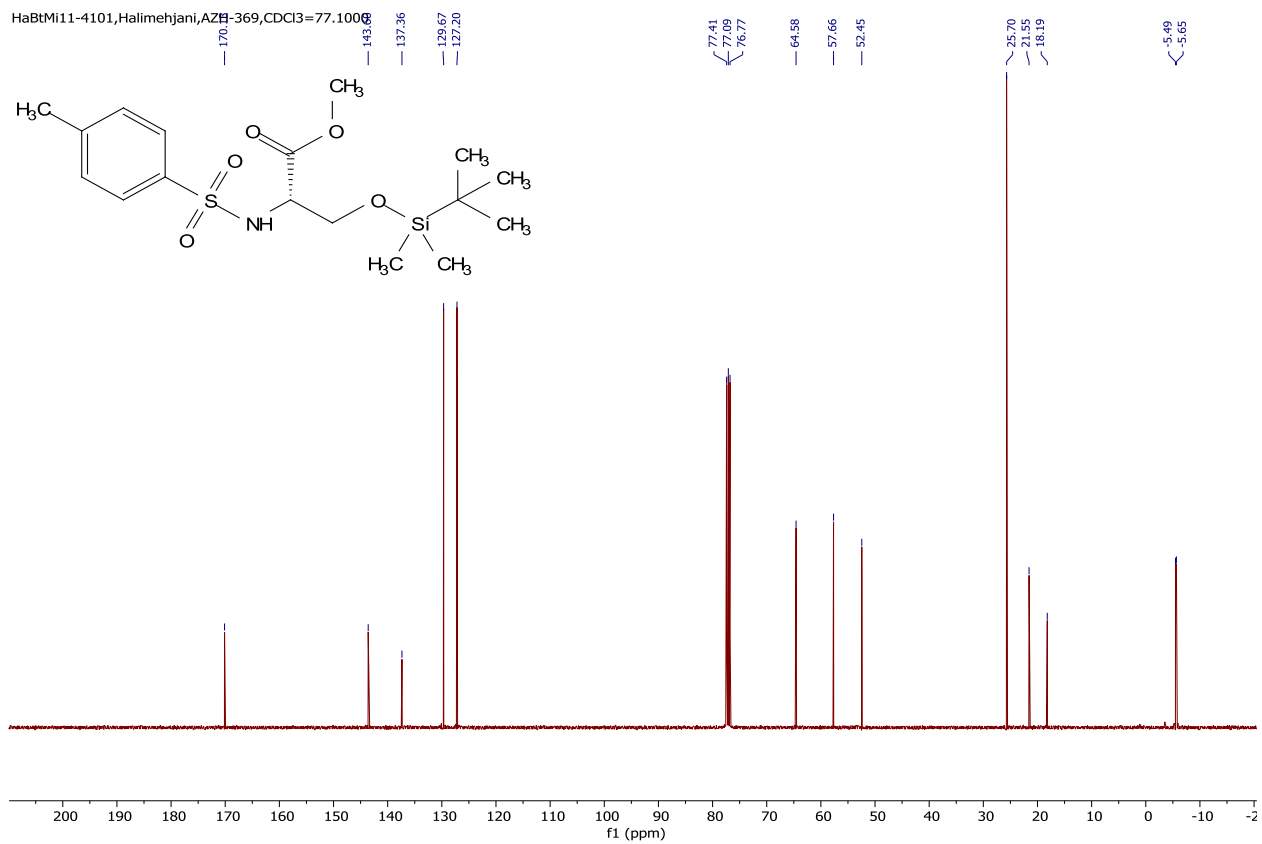

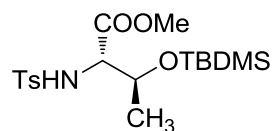

(2*S*,3*S*)-methyl 3-((*tert*-butyldimethylsilyl)oxy)-2-(4-methylphenylsulfonamido)butanoate:  $^1\text{H}$  NMR (400 MHz, Chloroform-*d*)  $\delta$  7.71 (d,  $J$  = 8.3 Hz, 2H), 7.27 (d,  $J$  = 8.4 Hz, 2H), 5.18 (d,  $J$  = 10.3 Hz, 1H), 4.29–4.26 (m, 1H), 3.83 (dd,  $J$  = 10.3, 2.1 Hz, 1H), 3.46 (s, 3H), 2.41 (s, 3H), 1.22 (d,  $J$  = 6.2 Hz, 3H), 0.81 (s, 9H), 0.02 (s, 3H), -0.07 (s, 3H) ppm;  $^{13}\text{C}$  NMR (101 MHz,  $\text{CDCl}_3$ )  $\delta$  170.4, 143.4, 137.4, 129.5, 127.2, 69.4, 61.7, 52.2, 25.6, 21.5, 20.7, 17.9, -4.3, -5.2 ppm; HRMS (ESI) calcd for  $\text{C}_{18}\text{H}_{31}\text{NO}_5\text{SSi}$   $[\text{M}+\text{Na}]^+$ : 424.1584; found: 424.1590;  $[\alpha]_{\text{D}}^{25}$  = -17.98 ( $c$  = 0.267,  $\text{CH}_2\text{Cl}_2$ ).

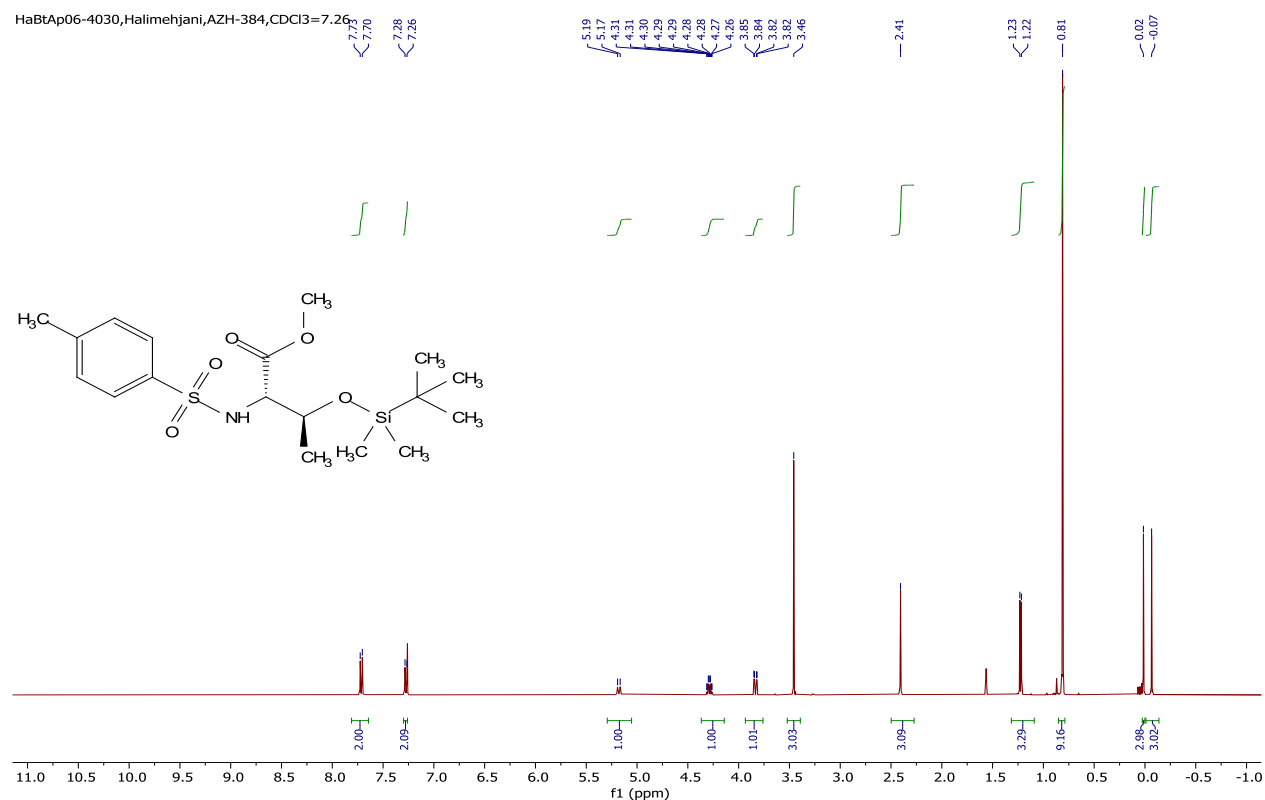

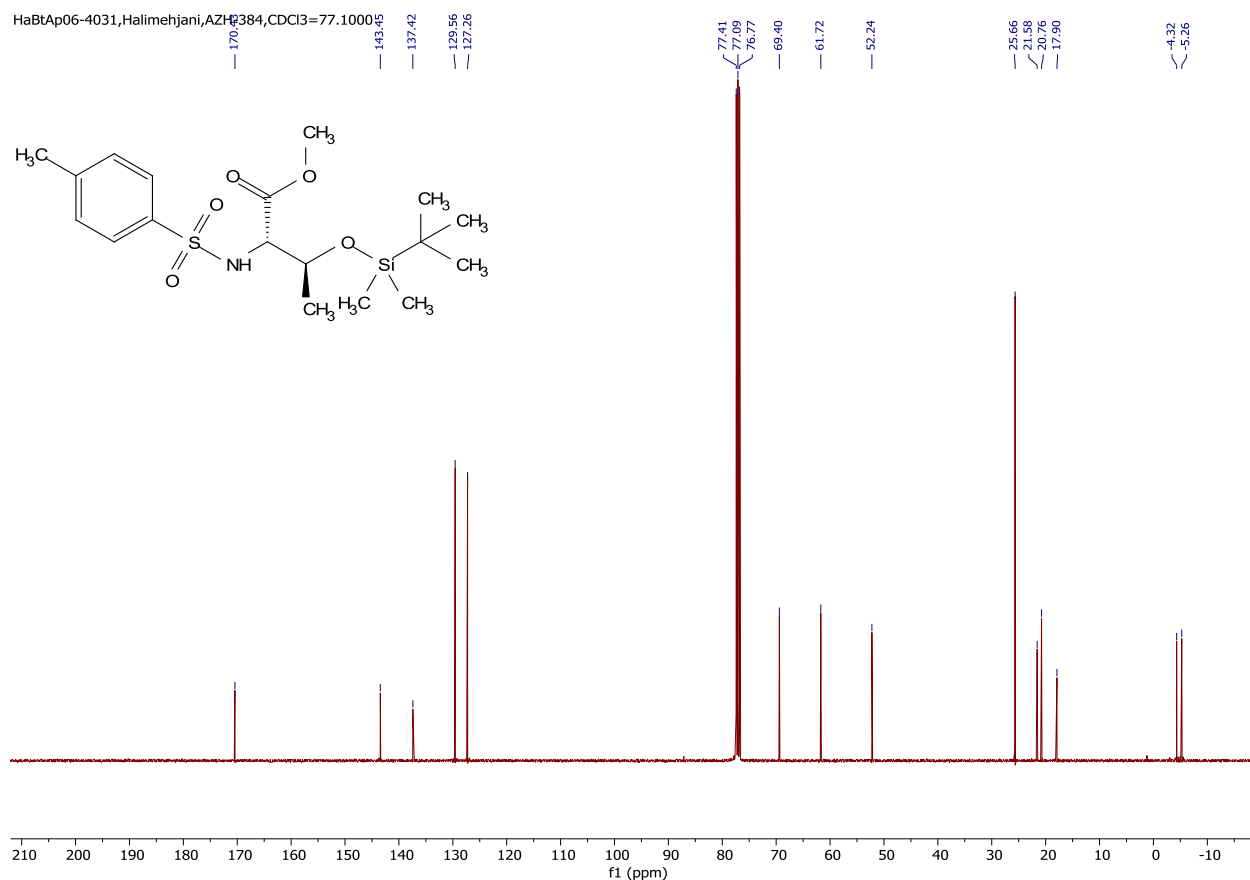

**Allylation of TBDMS-protected tosylamide by Mitsunobu reaction:** A mixture of silylated tosylamide (2 equiv), buta-2,3-dien-1-ol (1 equiv) and PPh<sub>3</sub> (2 equiv) in CH<sub>2</sub>Cl<sub>2</sub> (6 mL/mmol of alcohol) was cooled to 0 °C. The solution of DIAD (2 equiv) in CH<sub>2</sub>Cl<sub>2</sub> (6 mL/mmol) was then added dropwise at the same temperature. The mixture was allowed to warm to room temperature and further stirred for 6 hours. Finally, the reaction mixture was concentrated under reduced pressure, and the crude mixture was purified with flash column chromatography (hexane/AcOEt = 20/1) to give the pure product.<sup>5</sup> The products were applied directly in desilylation reactions as described below:

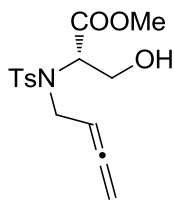

**Desilylation reaction:** Synthesis of (*S*)-methyl 2-(*N*-(buta-2,3-dien-1-yl)-4-methylphenylsulfonamido)-3-hydroxypropanoate (**II**): The Mitsunobu adduct XXX (1 mmol) was dissolved in a 1% HCl solution in ethanol (25 mL), which was prepared from conc. HCl and



EtOH, and the mixture was stirred for 5 h at room temperature. Water was added to the mixture, and the whole was extracted with EtOAc. The extract was washed with brine and dried over MgSO<sub>4</sub>. The filtrate was concentrated under reduced pressure to give an oily residue, which was purified by column chromatography over silica gel with *n*-hexane-EtOAc gradient (9:1 to 1:1) to give (*S*)-methyl 2-(*N*-(buta-2,3-dien-1-yl)-4-methylphenylsulfonamido)-3-hydroxypropanoate **1i** in quantitative yield.<sup>6</sup> <sup>1</sup>H NMR (500 MHz, Chloroform-*d*)  $\delta$  7.73 (d, *J* = 8.4 Hz, 2H), 7.30 (d, *J* = 8.7 Hz, 2H), 5.20–5.17 (m, 1H), 4.82–4.70 (m, 2H), 4.64 (dd, *J* = 7.2, 6.0 Hz, 1H), 4.12–4.00 (m, 2H), 3.89–3.75 (m, 2H), 3.59 (s, 3H), 2.42 (s, 3H), 2.31 (dd, *J* = 7.4, 6.7 Hz, 1H) ppm; <sup>13</sup>C NMR (126 MHz, CDCl<sub>3</sub>)  $\delta$  208.8, 170.2, 143.7, 136.9, 129.6, 127.5, 87.8, 61.3, 61.1, 52.3, 45.7, 21.6 ppm; HRMS (ESI) calcd for C<sub>15</sub>H<sub>19</sub>NO<sub>5</sub>S [M+NH<sub>4</sub>]<sup>+</sup>: 343.1328; found: 343.1323; [ $\alpha$ ]<sub>D</sub><sup>25</sup> = -55.09 (c = 0.57, CH<sub>2</sub>Cl<sub>2</sub>).

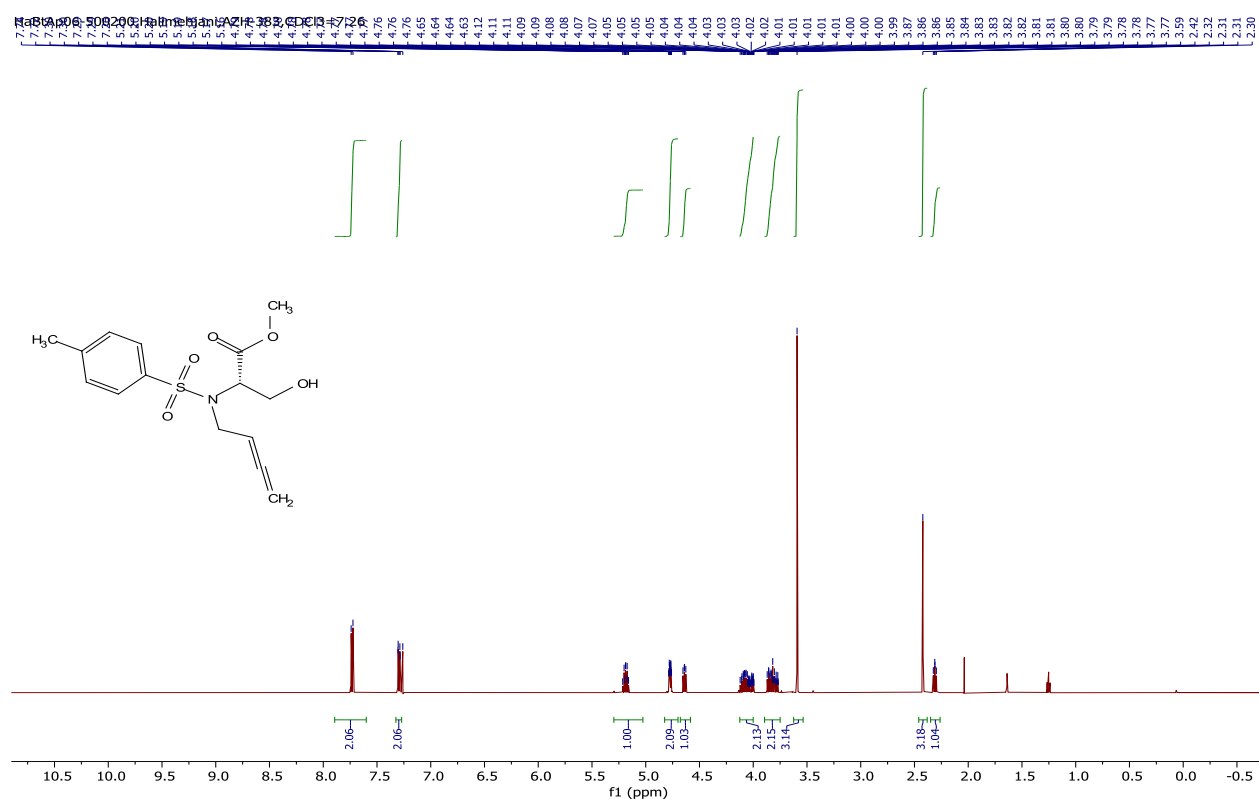

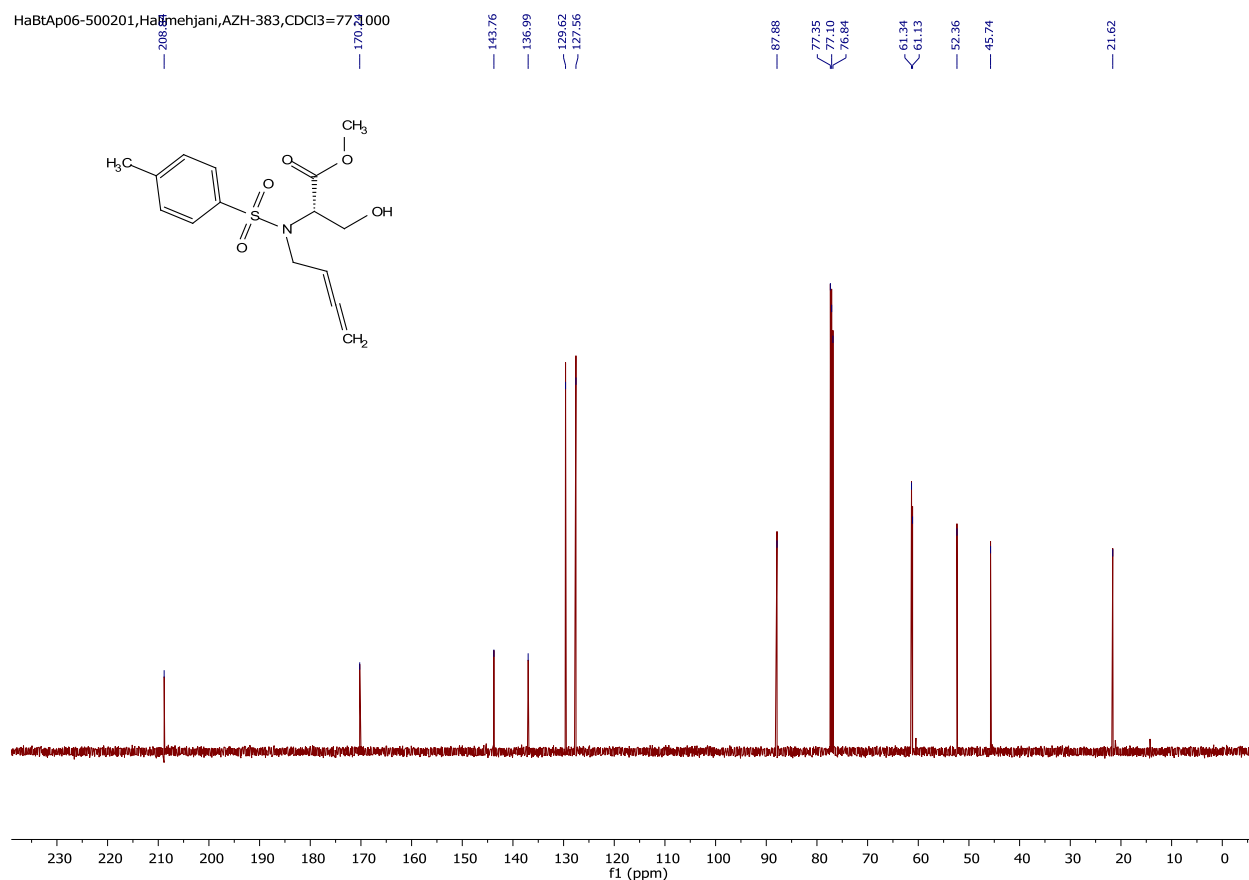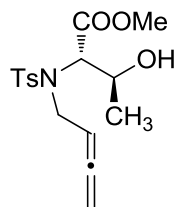

**Desilylation reaction:** Synthesis of (2S,3S)-methyl 2-(N-(buta-2,3-dien-1-yl)-4-methylphenylsulfonamido)-3-hydroxybutanoate (**3h**): Add 40 % aqueous HF solution (10 mL) rapidly to a stirred solution of Mitsunobu adduct (1 mmol) in MeCN (15 mL) at room temperature over 2-3 seconds. The reaction mixture was stirred for 2 hours and then quenched with solid NaHCO<sub>3</sub> (2.0 g) and H<sub>2</sub>O (20 mL). The product was extracted with Et<sub>2</sub>O (3 × 10 mL), the combined organic phases were dried over MgSO<sub>4</sub>, and concentrated in vacuo. Purification was carried out using column chromatography over silica gel with *n*-hexane-EtOAc gradient (9:1 to 1:1). <sup>1</sup>H NMR (500 MHz, Chloroform-*d*) δ 7.73 (d, *J* = 8.3 Hz, 2H), 7.29 (d, *J* = 7.9 Hz, 2H), 5.29–5.26 (m, 1H), 4.85 – 4.70 (m, 2H), 4.42 (d, *J* = 6.4 Hz, 1H), 4.29–4.26 (m, 1H), 4.17 – 3.93 (m, 2H), 3.51 (s, 3H), 2.45 (dd, *J* = 4.3, 0.5 Hz, 1H), 2.43 (s, 3H), 1.30 (d, *J* = 6.2 Hz, 3H) ppm; <sup>13</sup>C NMR (126 MHz, CDCl<sub>3</sub>) δ 208.8, 170.2, 143.7, 136.6, 129.5, 127.7, 88.3, 76.6, 66.7, 64.8, 52.0, 45.5, 21.6, 19.6 ppm; HRMS (ESI) calcd for C<sub>16</sub>H<sub>21</sub>NO<sub>5</sub>S [M+H]<sup>+</sup>: 340.1219; found: 340.1221; [α]<sub>D</sub><sup>25</sup> = -83.88 (c = 0.335, CH<sub>2</sub>Cl<sub>2</sub>).

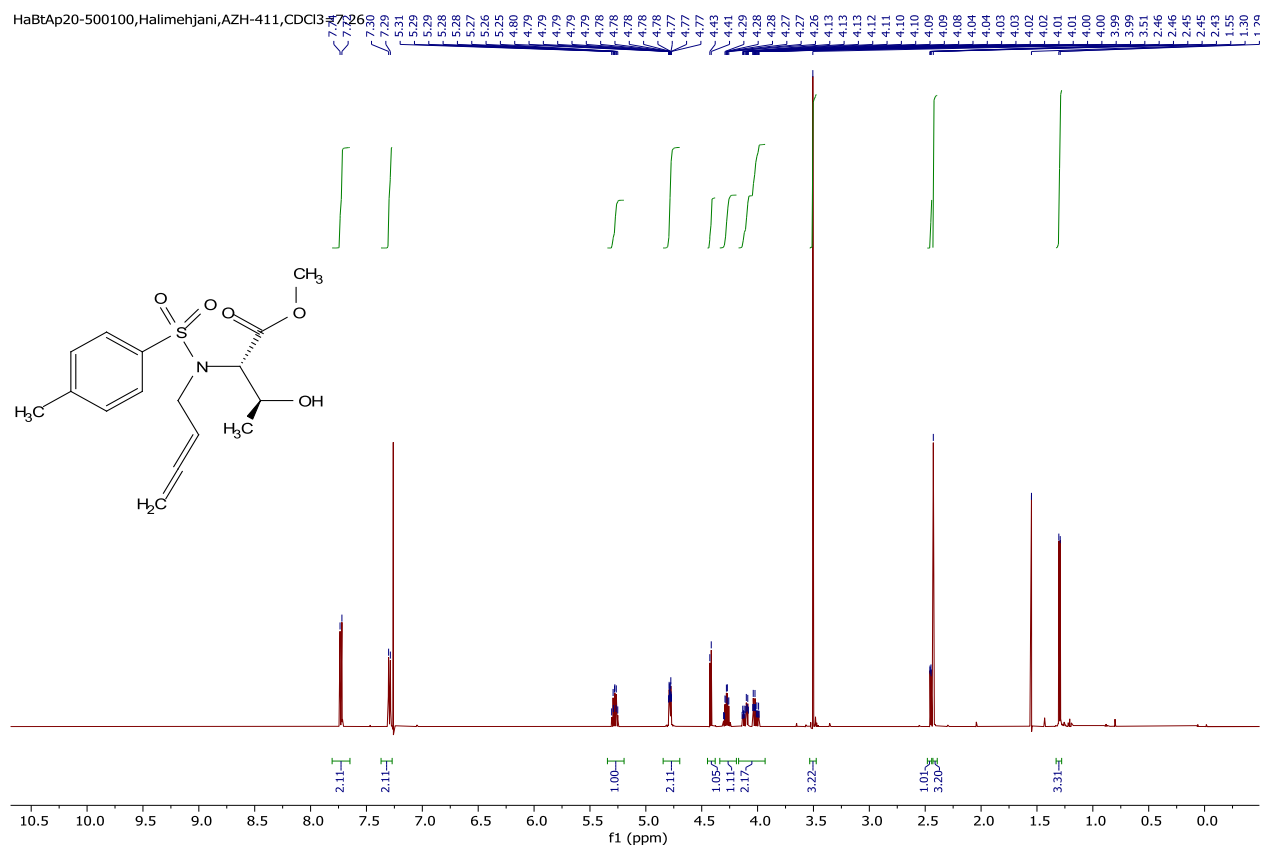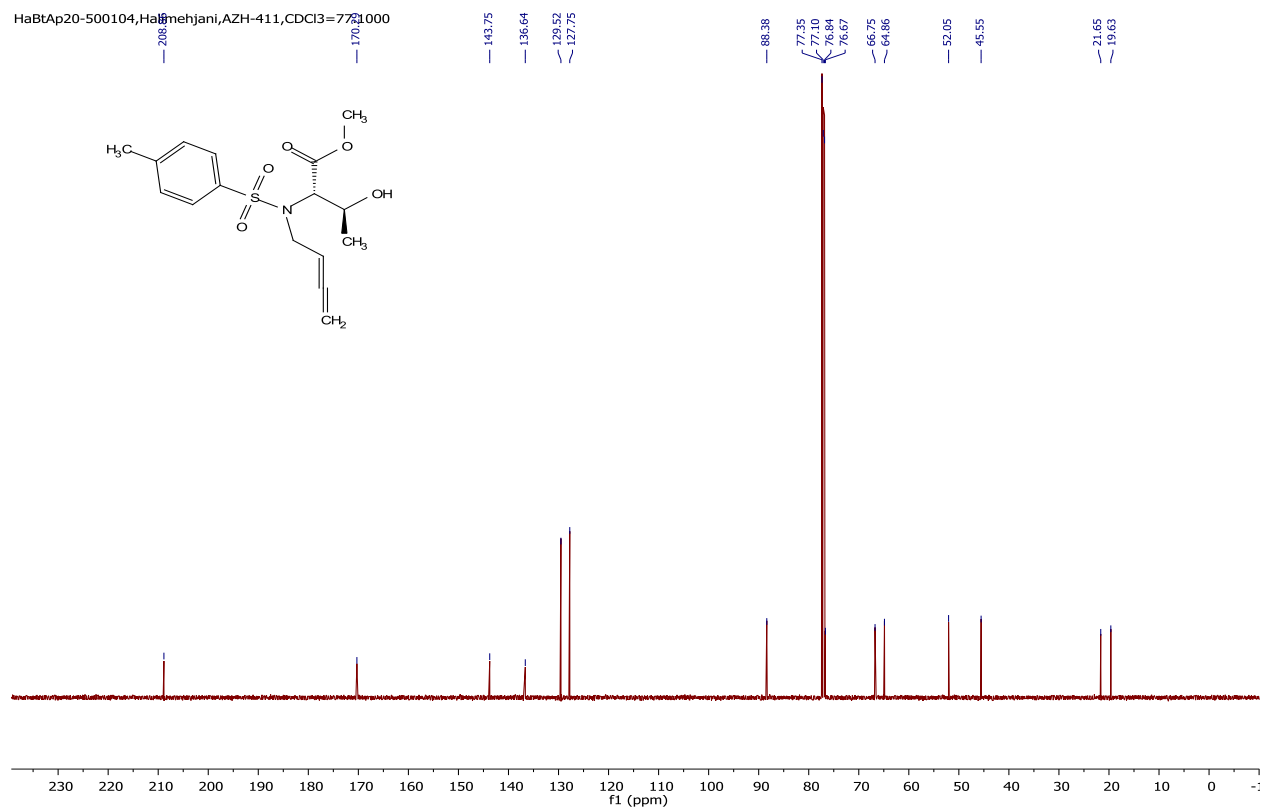

### Synthesis of Boc-protected allenol (**1j**) from (*L*)-valinol:

(*S*)-*tert*-butyl buta-2,3-dien-1-yl(1-hydroxy-3-methylbutan-2-yl)carbamate (**1j**) was prepared according to the following scheme:

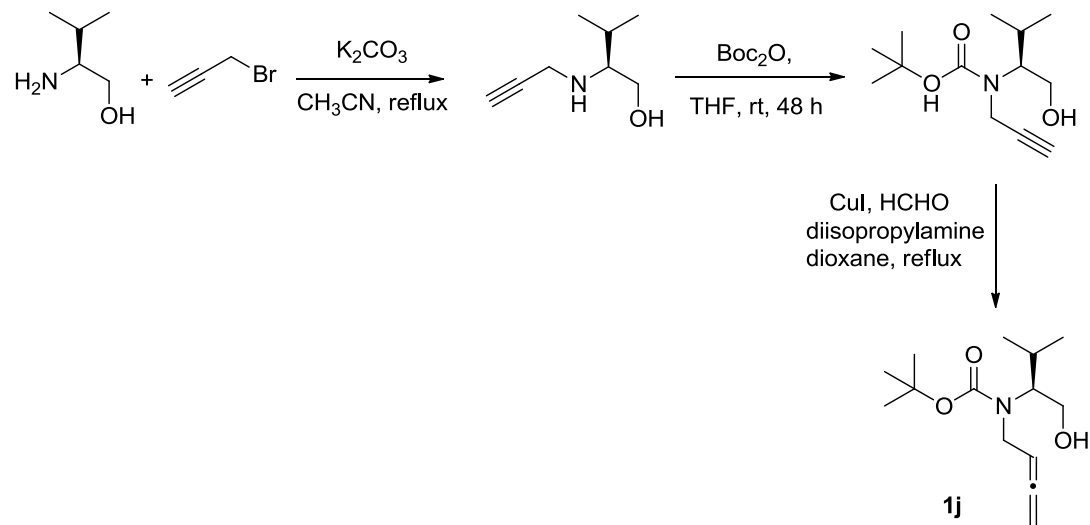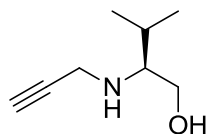

**Propargylation of *L*-valinol:** *Synthesis of (S)-3-methyl-2-(prop-2-yn-1-ylamino)butan-1-ol:* A mixture of *L*-valinol (1.03 g, 10 mmol), propargyl bromide (1.35 mL, 12 mmol) and potassium carbonate (3.45 g, 25 mmol) in acetonitrile (30 mL) was stirred at room temperature for overnight. The mixture was filtered and evaporated to give a crude mixture. Purification was carried out by silica gel column chromatography using EtOH:EtOAc eluent (1:9).  $^1H$  NMR (400 MHz, Chloroform-*d*)  $\delta$  3.64 (dd,  $J = 10.9, 4.0$  Hz, 1H), 3.50 – 3.35 (m, 3H), 2.56 (td,  $J = 6.1, 4.0$  Hz, 1H), 2.21 (t,  $J = 2.4$  Hz, 1H), 2.15 – 1.33 (m, 3H, -NH, -OH and -CH), 0.97 (d,  $J = 6.8$  Hz, 3H), 0.93 (d,  $J = 6.8$  Hz, 3H) ppm;  $^{13}C$  NMR (101 MHz,  $CDCl_3$ )  $\delta$  82.5, 71.3, 63.3, 60.7, 36.3, 28.9, 19.4, 18.6 ppm; HRMS (ESI) calcd for  $C_8H_{16}NO$   $[M+H]^+$ : 142.1232; found: 142.1225.

HaBtAp26-4020, Halimehjani, AZH-423, CDCl<sub>3</sub>=7.26

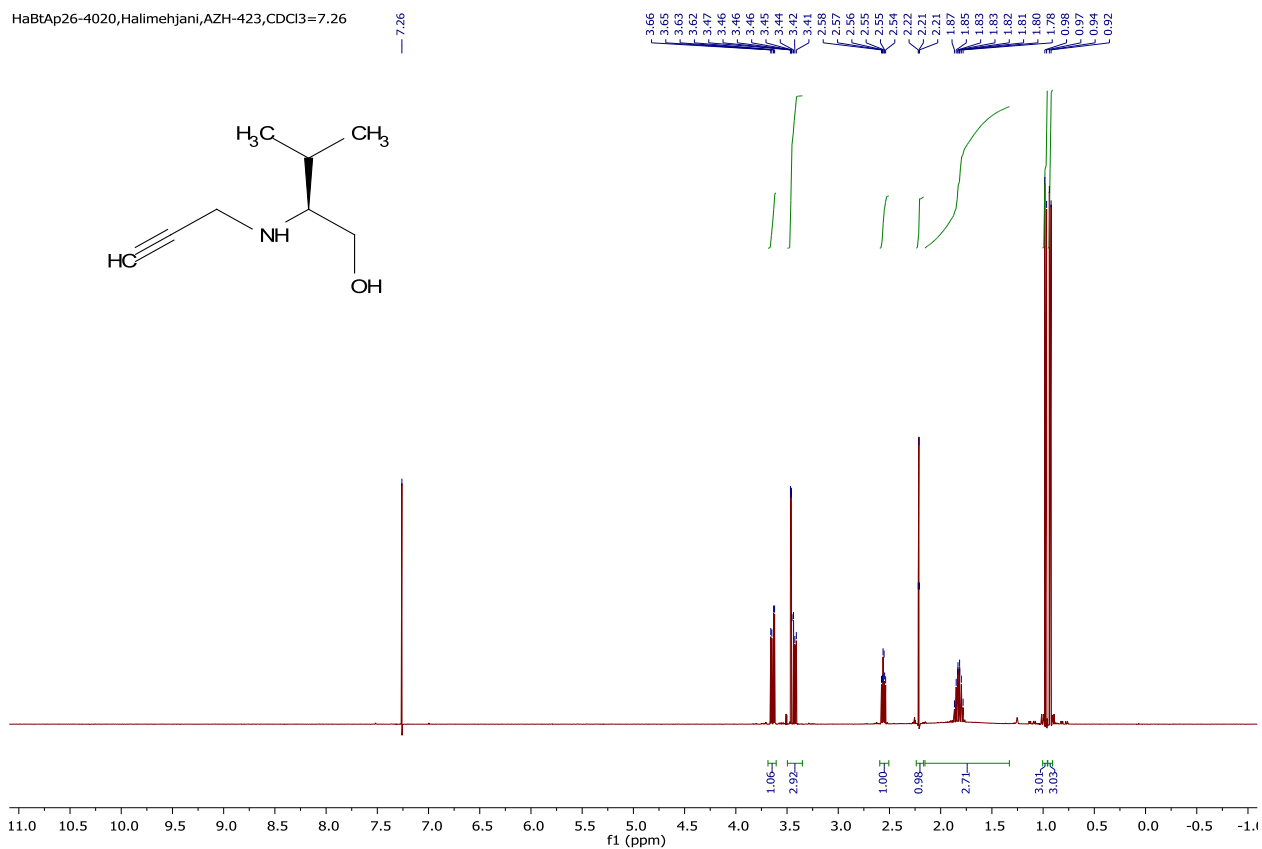

HaBtAp26-4021, Halimehjani, AZH-423, CDCl<sub>3</sub>=77.1000

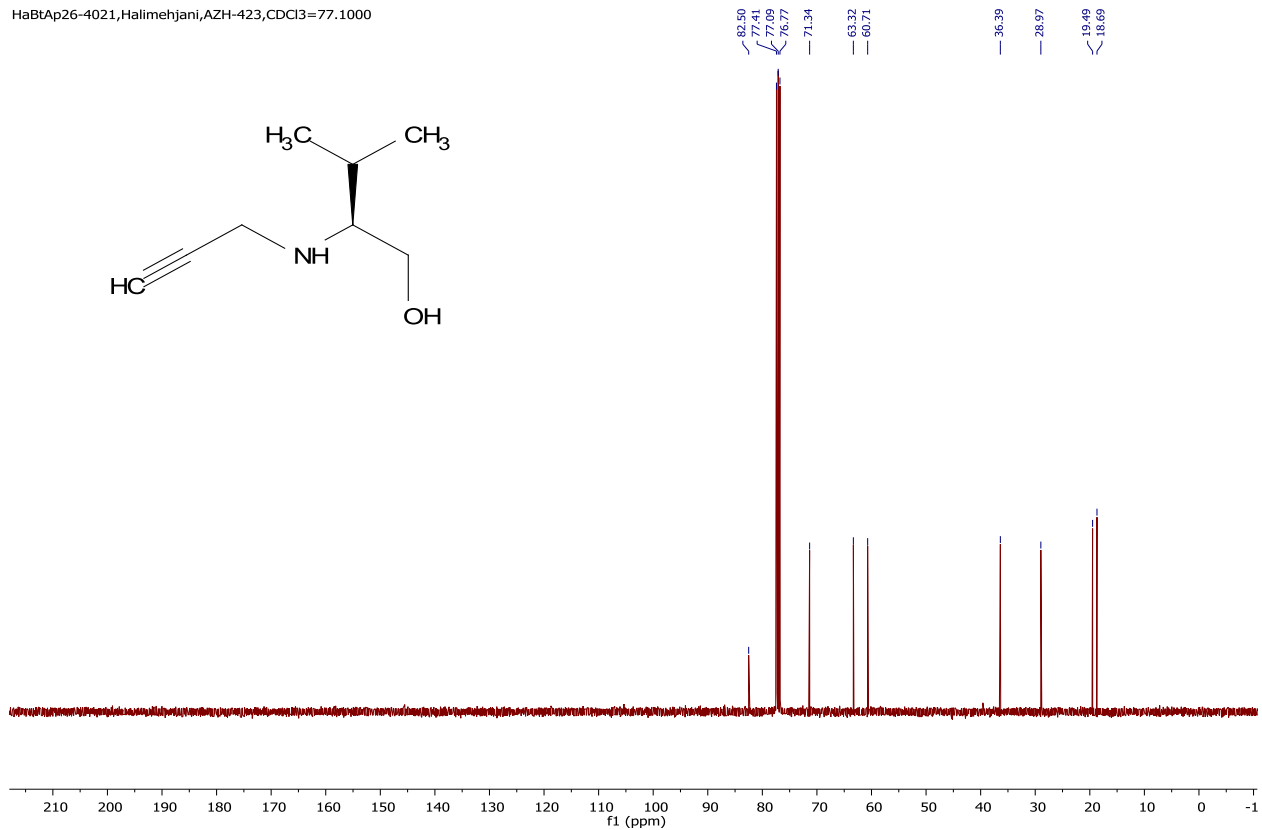

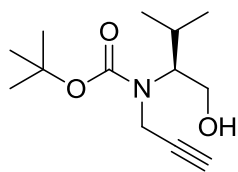

**Protection reaction of *N*-propargyl-(*L*)-valinol with  $\text{Boc}_2\text{O}$ : Synthesis of (*S*)-*tert*-butyl (1-hydroxy-3-methylbutan-2-yl)(prop-2-yn-1-yl)carbamate:** The propargylated product (6.1 mmol) and  $\text{Boc}_2\text{O}$  (7 mmol) was dissolved in THF (20 mL) and the mixture was stirred at room temperature for 48 h. The solvent was evaporated under reduced pressure and purified by  $\text{SiO}_2$  column chromatography (EtOAc:*n*-pentane, 3:7) to give the product in 88% yield.  $^1\text{H}$  NMR (400 MHz, Chloroform-*d*)  $\delta$  4.27 – 3.47 (m, 5H), 2.66 (brs, 1H), 2.26 (brs, 1H), 2.04 (brs, 1H), 1.48 (s, 9H), 0.97 (t,  $J = 7.9$  Hz, 3H), 0.90 (dd,  $J = 6.5, 3.3$  Hz, 3H) ppm;  $^{13}\text{C}$  NMR (101 MHz,  $\text{CDCl}_3$ )  $\delta$  156.1, 80.7, 70.9, 65.2, 62.7, 35.1, 32.9, 28.4, 27.7, 26.9, 20.1 ppm; HRMS (ESI) calcd for  $\text{C}_{20}\text{H}_{21}\text{NO}_3\text{S} [\text{M}+\text{H}]^+$ : 242.1756; found: 242.1751.

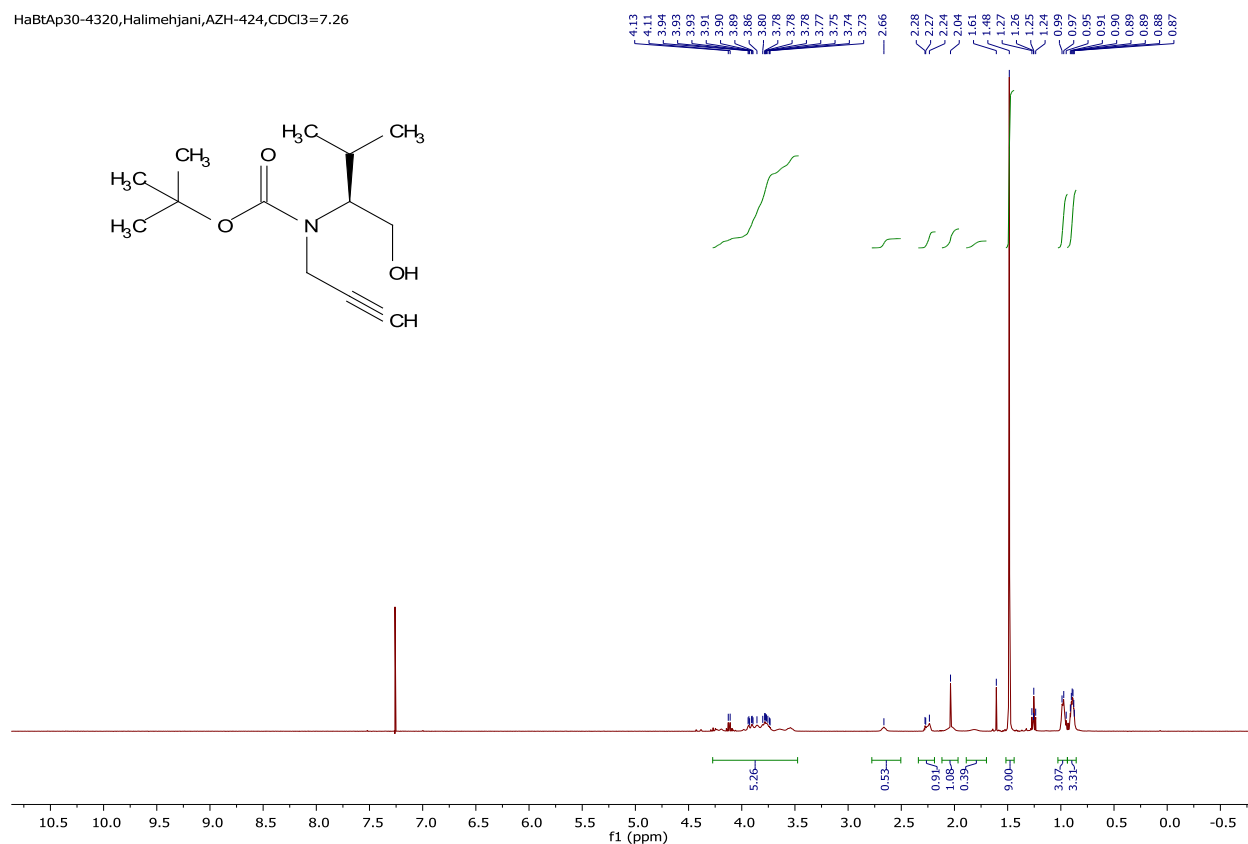

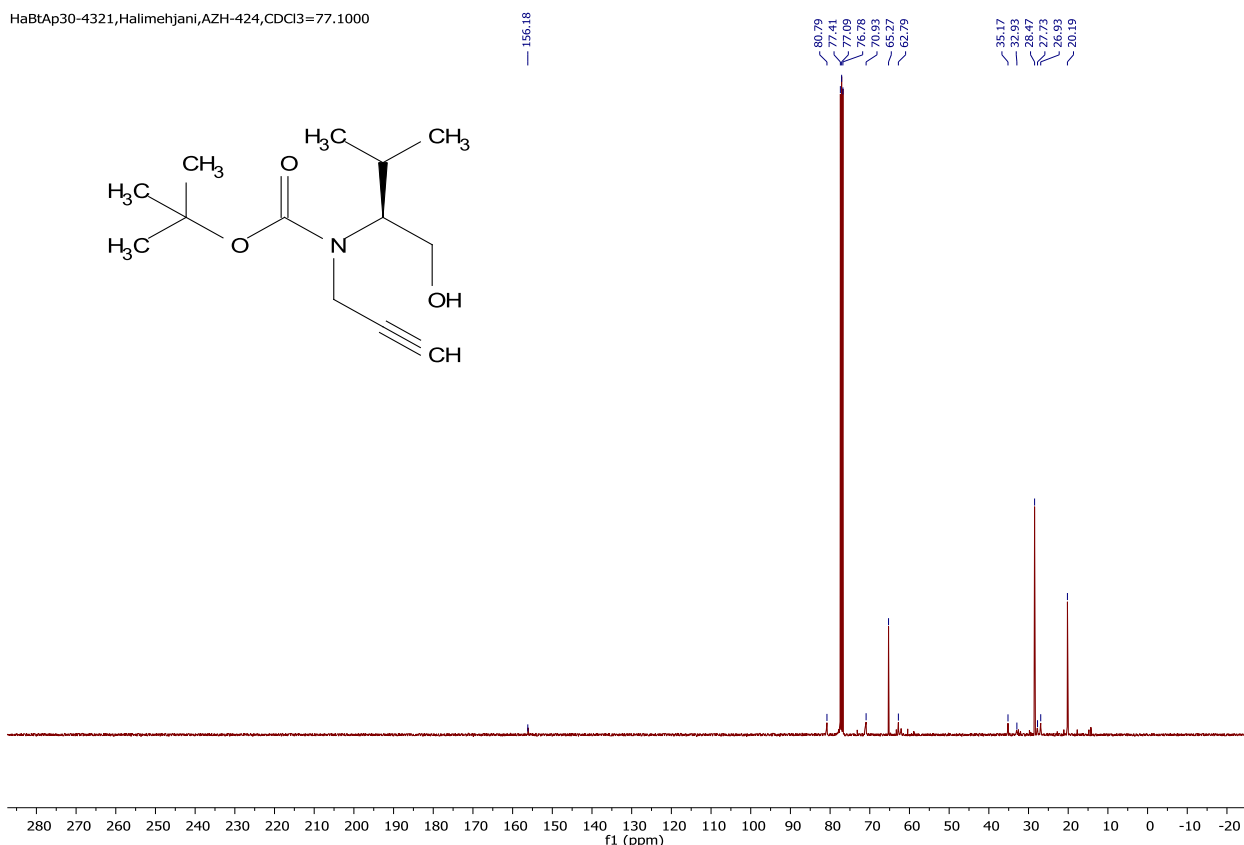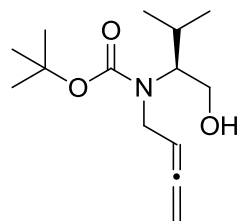

**Synthesis of Boc-protected allenol (**1j**):** A suspension of Boc-protected propargylated adduct (1.0 equiv), cuprous iodide (0.5 equiv), paraformaldehyde (2.5 equiv) and diisopropylamine (1.8 equiv) in dioxane (6 mL/mmol) was gently heated at reflux and stirred for overnight, cooled to room temperature, and filtered through a Celite pad. The dark-brown filtrate was concentrated in vacuo to afford a gummy residue. The residue was triturated with diethyl ether and filtered through the same Celite pad. This procedure was repeated 2 more times until a light yellow filtrate was obtained. Finally, the solvent was evaporated under reduced pressure to afford the crude product which was purified by silica gel column chromatography using EtOAc:*n*-pentane (1:10) to afford the Boc-protected allenol **1j** in 50% yield. (*S*)-*tert*-butyl buta-2,3-dien-1-yl(1-hydroxy-3-methylbutan-2-yl)carbamate (**1j**): <sup>1</sup>H NMR (500 MHz, Chloroform-*d*) δ 5.51 – 5.09 (m, 1H), 4.78–4.74 (m, 2H), 4.16 – 2.72 (m, 6H), 2.23 – 1.85 (m, 1H), 1.44 (s, 9H), 0.95 (d, *J* = 6.7 Hz, 3H), 0.86 (d, *J* = 6.7 Hz, 3H) ppm; <sup>13</sup>C NMR (126 MHz, CDCl<sub>3</sub>) δ 208.1, 156.7, 88.0, 80.1, 76.7, 76.5, 65.4, 62.6, 28.3, 26.7, 20.1, 20.0 ppm; HRMS (ESI) calcd for C<sub>14</sub>H<sub>26</sub>NO<sub>3</sub> [M+H]<sup>+</sup>: 256.1913; found: 256.1908; [α]<sub>D</sub><sup>25</sup> = +24.36 (c = 0.587, CH<sub>2</sub>Cl<sub>2</sub>).

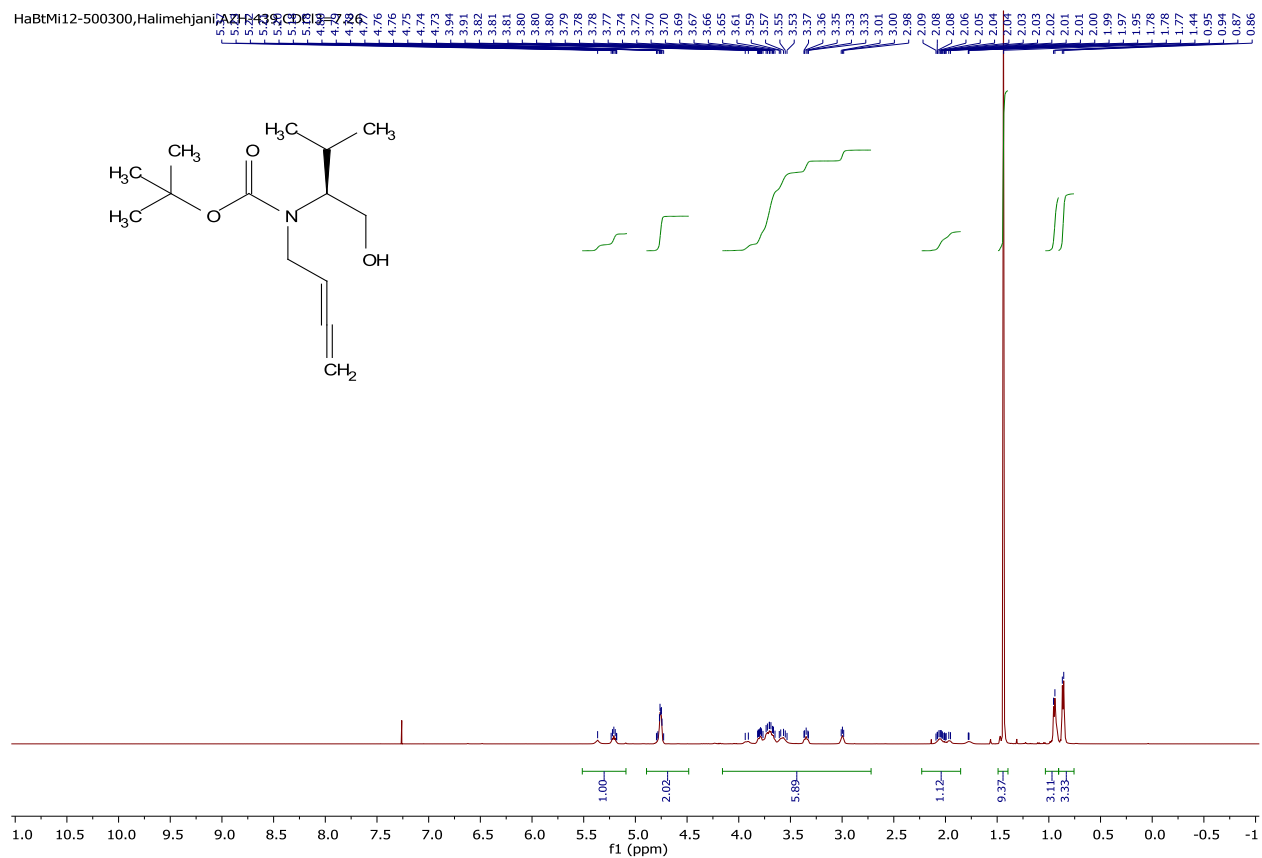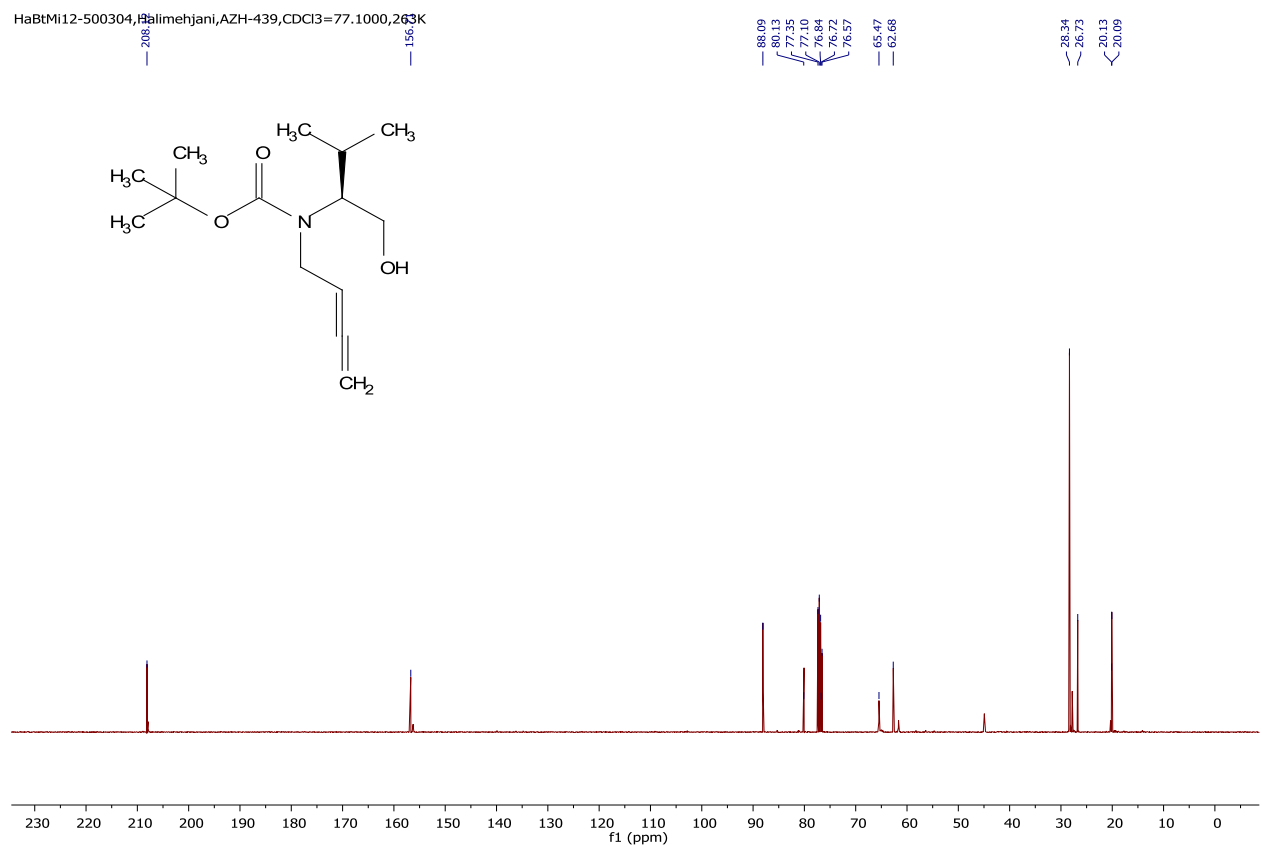



## Synthesis of allenols **1l-1n** and **3a-3f**

Allenols **1l-1n** and **3a-3f** were prepared from the corresponding allenols **1k** and **1a** respectively, according to the following scheme. For (R=H), Swern oxidation of allenol **1k** afforded the corresponding allenal in 95% isolated yield. For allenol **1a** (R=CH<sub>3</sub>), Swern oxidation afforded the corresponding allenal in excellent yield, but complete epimerization was observed during the oxidation. For this purpose, various oxidation methods were screened to find an epimerization-free protocol. Finally, we found that Dess–Martin oxidation of allenol **1a** afforded the corresponding allenal in 91% yield and 88% ee. The ee of the allenal (R=CH<sub>3</sub>) was determined as 88% by the borohydride reduction procedure.<sup>9</sup> Finally, the reaction of freshly prepared allenals with Grignard reagents afforded the final allenols with almost similar ee and satisfactory diastereoselectivity. In the case of **3a-3f**, purification afforded the major diastereomer with excellent dr ratio.

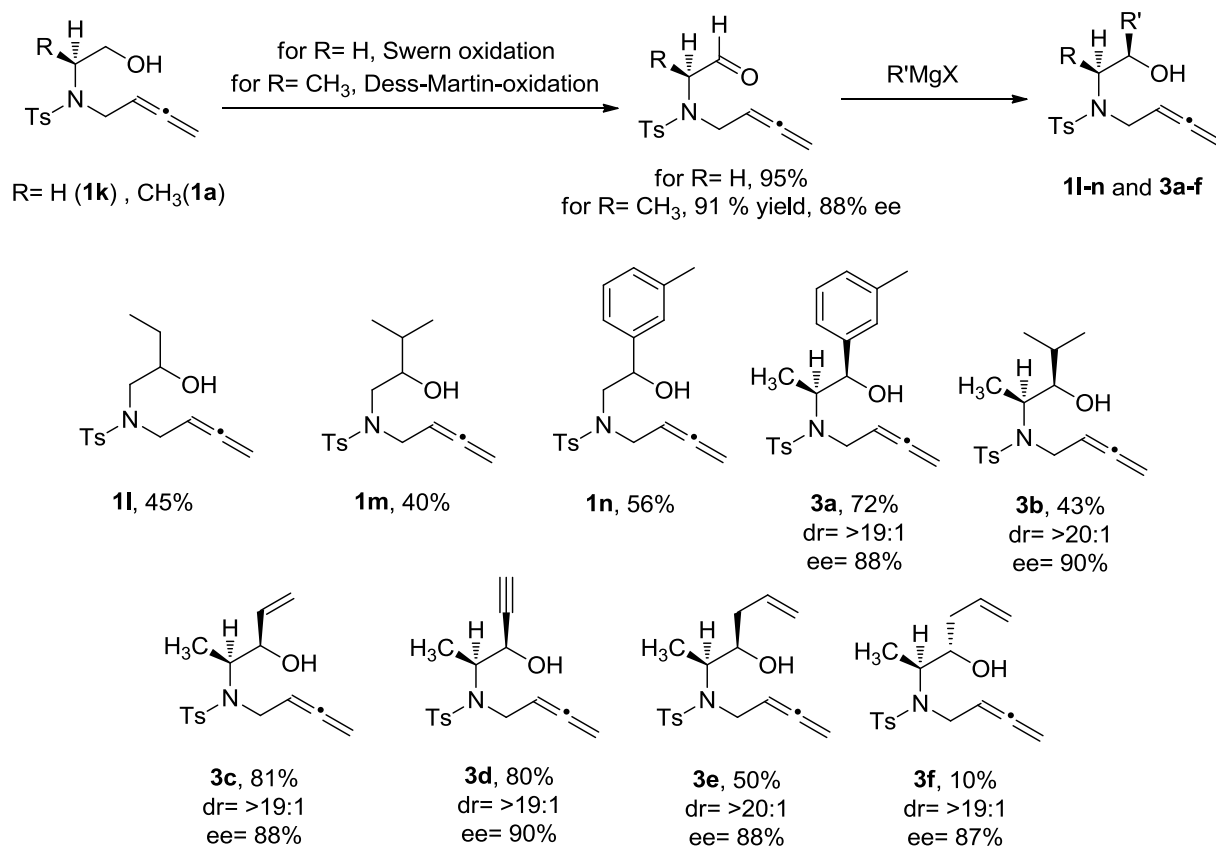

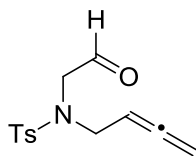

**Swern Oxidation: Synthesis of *N*-(buta-2,3-dien-1-yl)-4-methyl-*N*-(2-oxoethyl)benzenesulfonamide:** In a flask under argon atmosphere, Oxalyl chloride (13.5 mmol, 1.5 equiv) was dissolved in CH<sub>2</sub>Cl<sub>2</sub> (36 mL) and the mixture was cooled to -78 °C. DMSO (27 mmol, 3 equiv) was added dropwise and the mixture was stirred at the same temperature for 30 minutes. Then, a solution of allenol **1k** (3 mmol, 1 equivalent) dissolved in CH<sub>2</sub>Cl<sub>2</sub> (15 mL) was added dropwise to the reaction mixture and stirring was continued for 1 hour. Finally, Et<sub>3</sub>N (18 mmol, 6 equivalents) was added to the reaction mixture and the reaction mixture was allowed to warm to room temperature (approximately 2 hours). The reaction mixture was quenched with water (50 mL) and the organic layer was separated. The aqueous phase was extracted two more times by CH<sub>2</sub>Cl<sub>2</sub> and the combined organic layers were dried with MgSO<sub>4</sub> and concentrated under vacuum to afford the crude product which was purified by silica gel column chromatography using EtOAc: *n*-pentane (2:8).<sup>10</sup> <sup>1</sup>H NMR (400 MHz, Chloroform-*d*) δ 9.62 (t, *J* = 1.5 Hz, 1H), 7.69 (d, *J* = 8.3 Hz, 2H), 7.32 (d, *J* = 7.9 Hz, 2H), 5.13 – 4.86 (m, 1H), 4.73 (dt, *J* = 6.6, 2.4 Hz, 2H), 3.93 – 3.76 (m, 4H), 2.43 (s, 3H) ppm; <sup>13</sup>C NMR (101 MHz, CDCl<sub>3</sub>) δ 210.2, 198.3, 144.1, 135.7, 129.9, 127.4, 85.4, 76.7, 56.2, 48.8, 21.5 ppm; HRMS (ESI) calcd for C<sub>13</sub>H<sub>15</sub>NO<sub>3</sub>S [M+H]<sup>+</sup>: 266.0851; found: 266.0846.

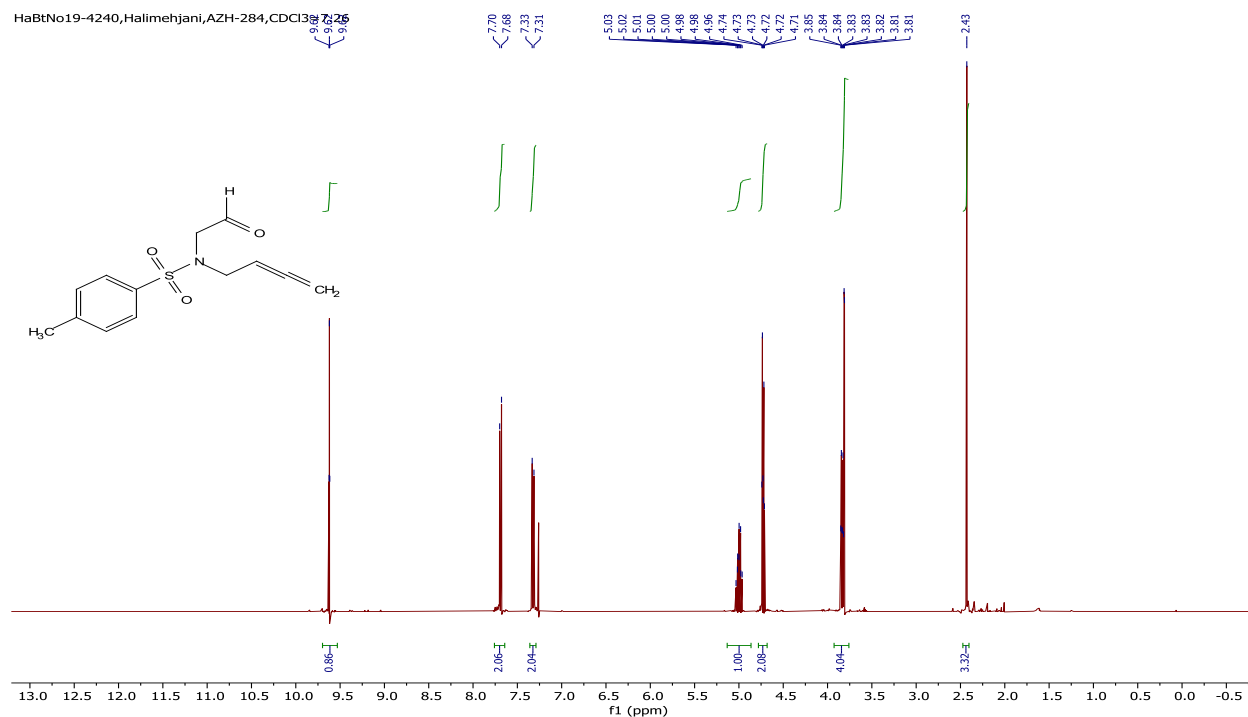

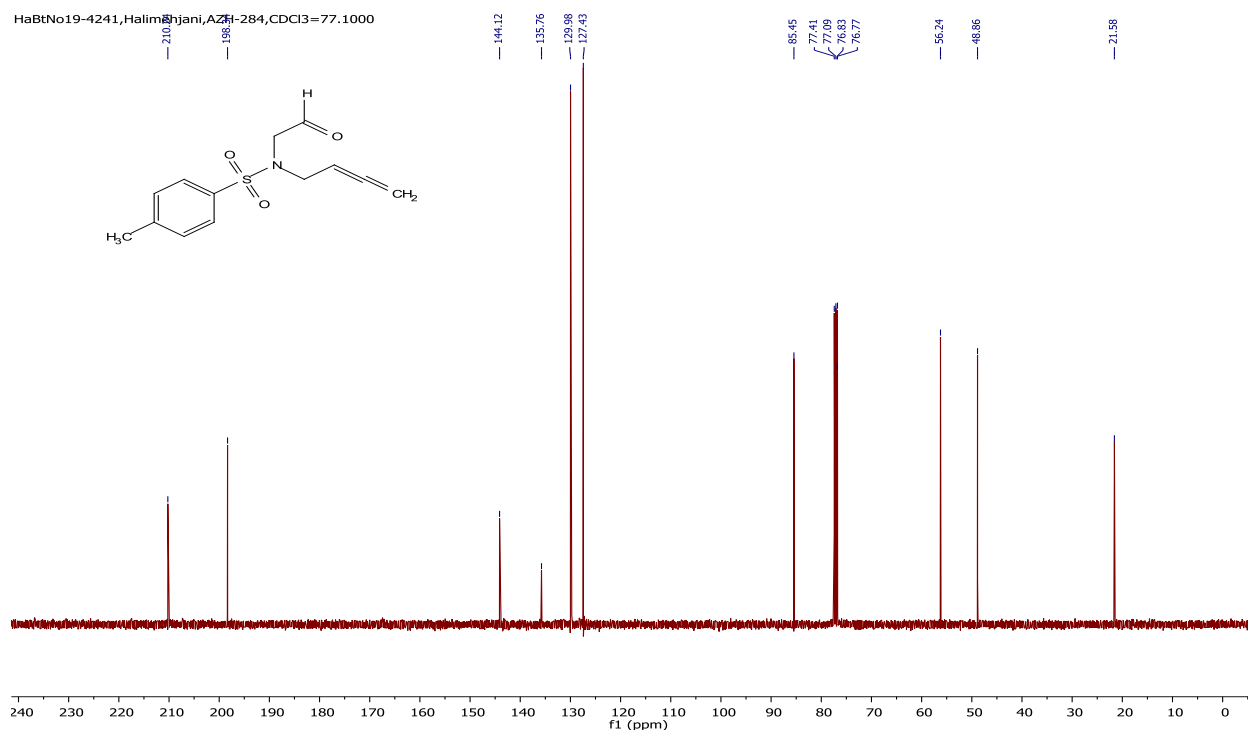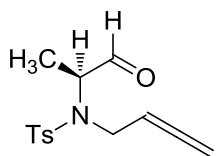

**Dess-Martin Oxidation of allenol 1a: Synthesis of (S)-N-(buta-2,3-dien-1-yl)-4-methyl-N-(1-oxopropan-2-yl)benzenesulfonamide:**<sup>11</sup> To a solution of allenol **1a** (17 mmol, 1 equiv) in water-saturated CH<sub>2</sub>Cl<sub>2</sub> (60 mL) at 0 °C, Dess-Martin-Periodinane (34 mmol, 2 equiv) was added, and the mixture was allowed to warm to room temperature. Meanwhile after 15 minutes, in each 5 minutes, 6 mL of water-saturated CH<sub>2</sub>Cl<sub>2</sub> was added to the reaction mixture until the TLC shows complete consumption of the starting material. Finally, the reaction mixture was diluted with CH<sub>2</sub>Cl<sub>2</sub> and the organic phase was washed several times with a mixture of saturated NaHCO<sub>3</sub> (aqueous) and saturated Na<sub>2</sub>S<sub>2</sub>O<sub>3</sub> (aqueous). The resulting organic extract was dried over MgSO<sub>4</sub> and concentrated under reduced pressure. Purification was carried out by silica gel column chromatography using Et<sub>2</sub>O:*n*-pentane (4:6). The prepared aldehyde is not stable for long time and the freshly prepared aldehyde must be used for the Grignard reaction. The *ee* of the prepared aldehyde was assigned by the reduction of aldehyde to the corresponding alcohol according to the method described by Myers et al.<sup>9</sup> <sup>1</sup>H NMR (400 MHz, Chloroform-*d*) δ 9.66 (s, 1H), 7.71 (d, *J* = 8.3 Hz, 2H), 7.31 (d, *J* = 7.7 Hz, 2H), 5.10–4.06 (m, , 1H), 4.81 – 4.64 (m, 2H), 4.33 (q, *J* = 7.1 Hz, 1H), 4.05 (ddt, *J* = 14.9, 6.0, 2.9 Hz, 1H), 3.64 (ddt, *J* = 14.9, 8.5, 1.8 Hz, 1H), 2.43 (s, 3H), 1.16 (d, *J* = 7.1 Hz, 3H) ppm; <sup>13</sup>C NMR (101 MHz, CDCl<sub>3</sub>) δ 210.0, 200.0, 143.9, 137.3, 129.9, 127.2, 86.7, 76.7, 61.2, 44.5, 21.5, 11.5 ppm; HRMS (ESI) calcd for

$\text{C}_{14}\text{H}_{17}\text{NO}_3\text{S}$   $[\text{M}+\text{NH}_4]^+$ : 297.1273; found: 297.1270. HPLC data for the reduced compound: (ChiralPAK AD-3, heptane/EtOH = 80:20, 0.5 mL/min)  $t_R = 19.39$  min (minor),  $t_R = 28.71$  min (major), 88% ee. ;  $[\alpha]_D^{25} = 26.28$  ( $c = 0.7$ ,  $\text{CH}_2\text{Cl}_2$ ).

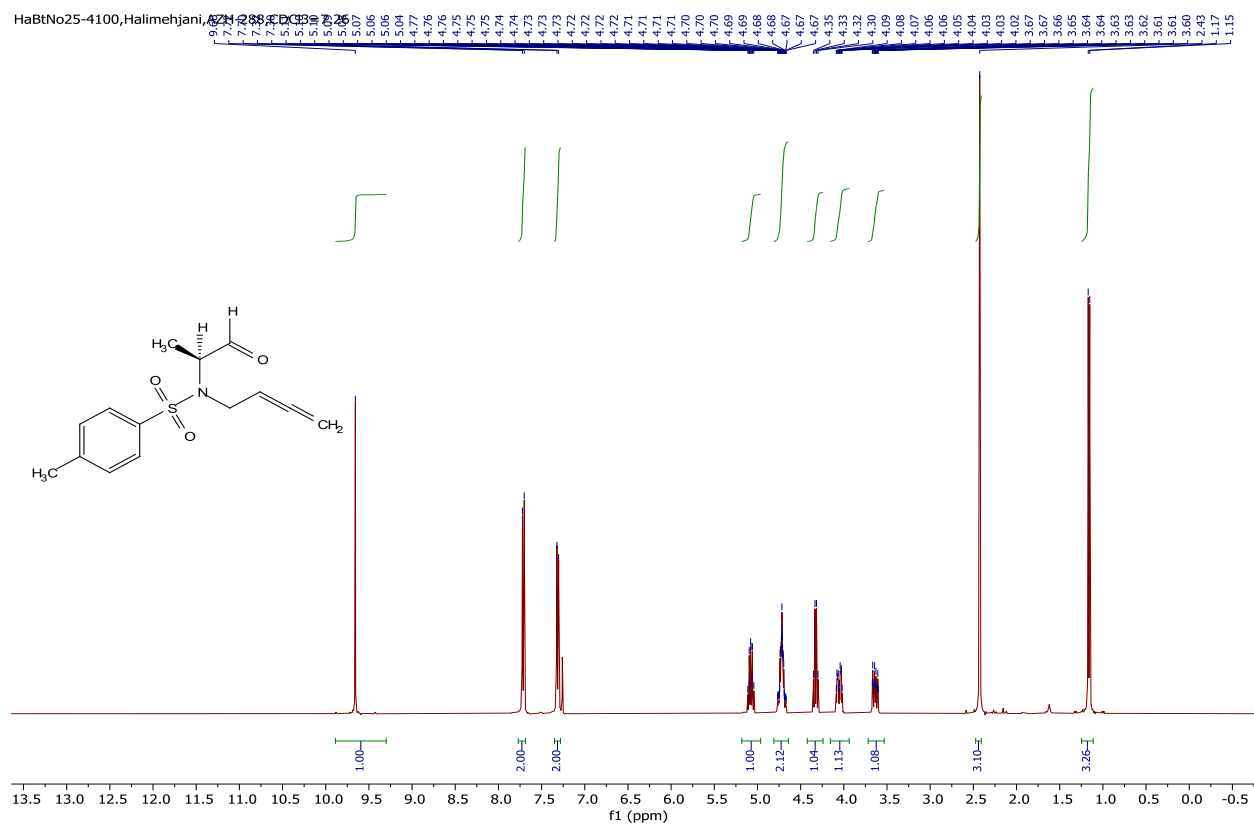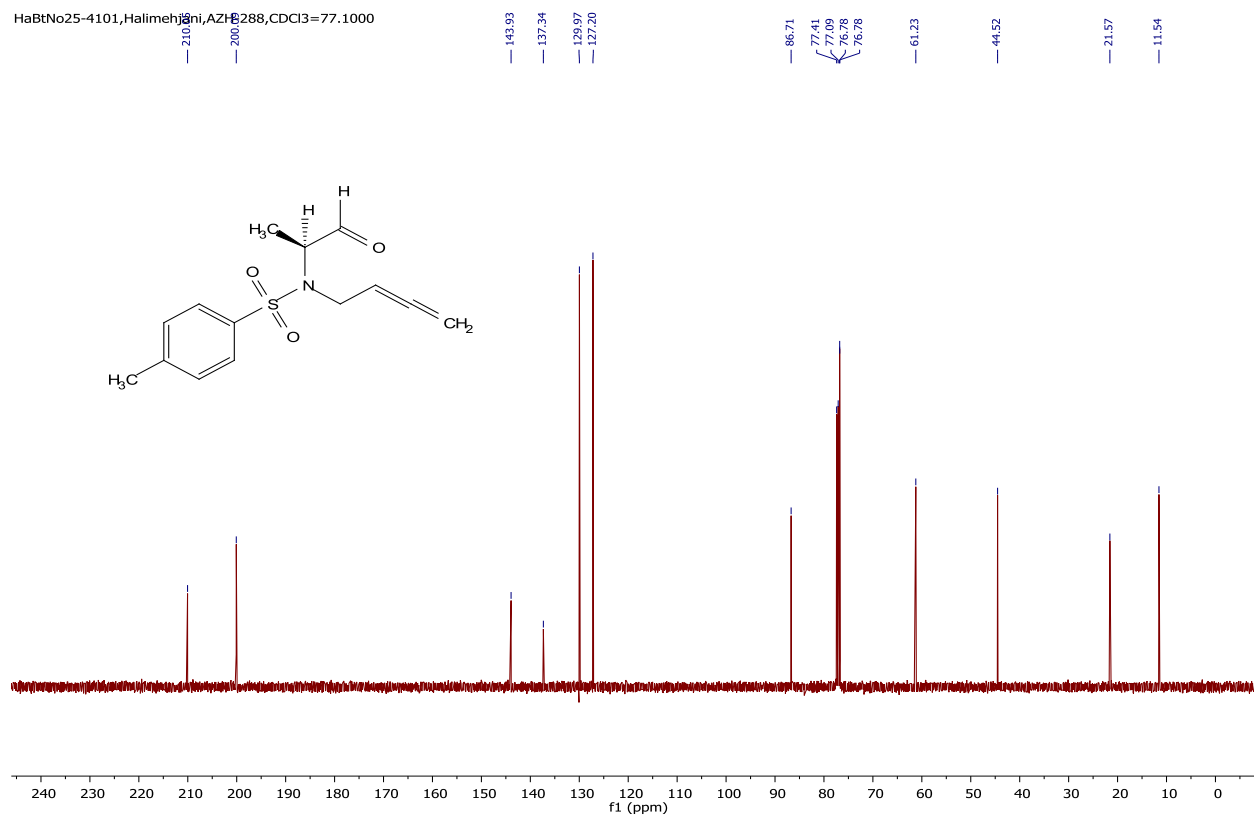

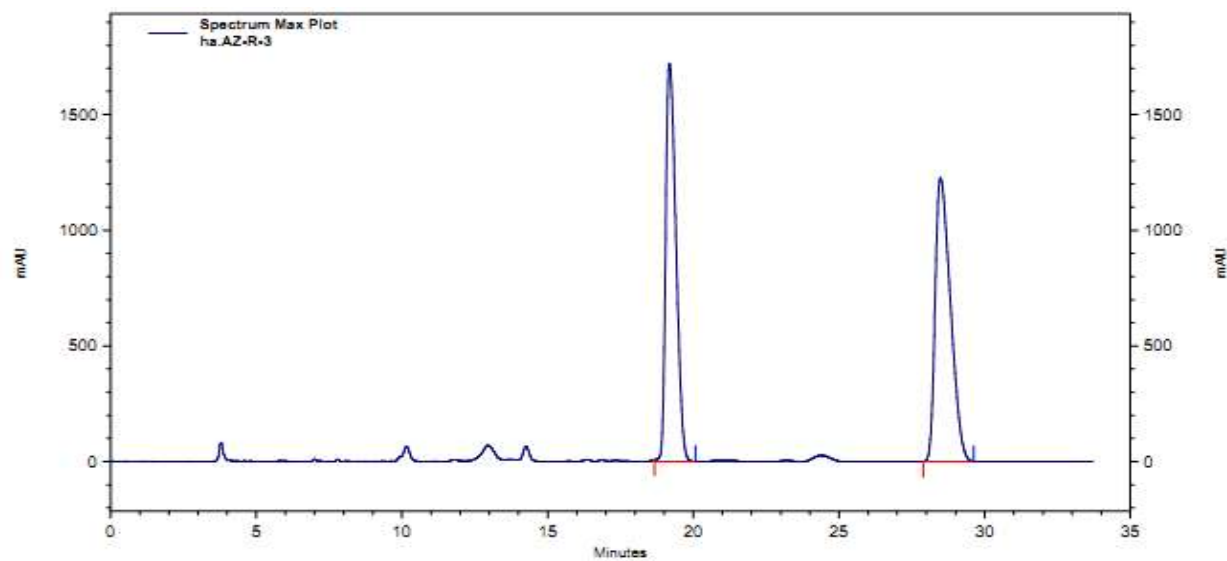

Spectrum Max Plot  
Results

| Peak Number | Retention Time | Area Percent | Area        |
|-------------|----------------|--------------|-------------|
| 1           | 19,185         | 48,535       | 5666199582  |
| 2           | 28,483         | 51,465       | 6008325586  |
| Totals      |                | 100,000      | 11674525168 |

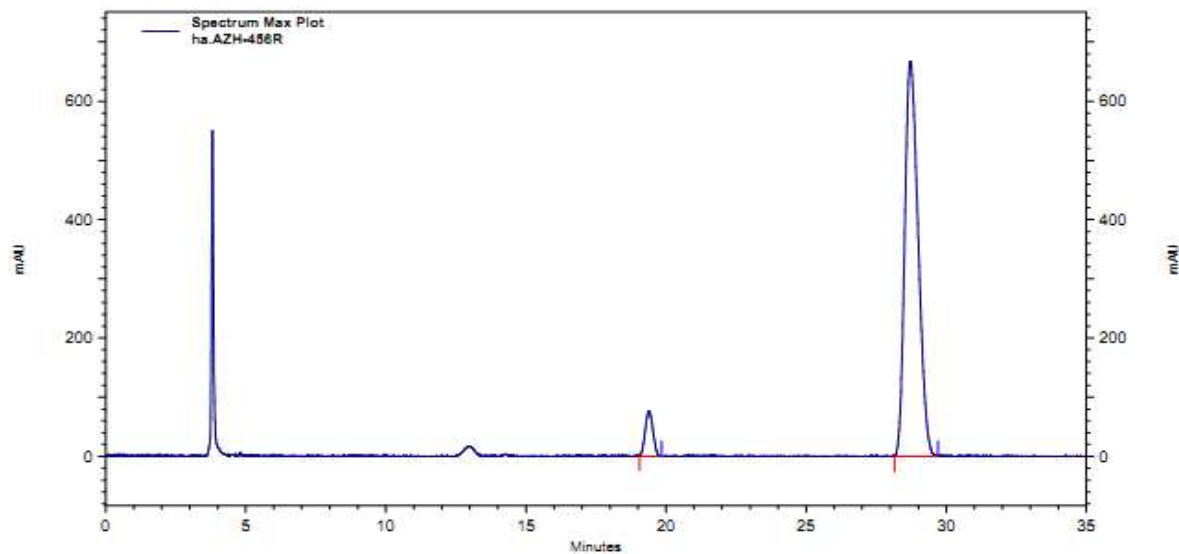

Spectrum Max Plot  
Results

| Peak Number | Retention Time | Area Percent | Area       |
|-------------|----------------|--------------|------------|
| 1           | 19,397         | 6,233        | 197805735  |
| 2           | 28,708         | 93,767       | 2975662339 |
| Totals      |                | 100,000      | 3173468074 |

**General procedure for the Grignard Reaction:** To a solution of an allenal (2 mmol) in dry THF (5 mL) at 0°C, a Grignard reagent (2.5 mmol) was added dropwise for about 10 minutes and the reaction mixture was allowed to warm to room temperature (about 1 hour). The reaction was quenched with cool saturated ammonium chloride solution and extracted with ethyl acetate. The organic phase was washed with water and brine, dried over anhydrous sodium sulfate, and concentrated under vacuum to afford the crude product. Purification was carried out by silica gel column chromatography using EtOAc:*n*-pentane (1:9).<sup>12</sup>

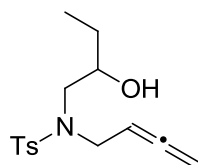

*N*-(buta-2,3-dien-1-yl)-*N*-(2-hydroxybutyl)-4-methylbenzenesulfonamide

(**11**): The reaction was carried out according to the general procedure using ethylmagnesium bromide (1M in THF): <sup>1</sup>H NMR (500 MHz, Chloroform-*d*) δ 7.70 (d, *J* = 8.3 Hz, 2H), 7.30 (d, *J* = 8.3 Hz, 2H), 5.01 – 4.85 (m, 1H), 4.79 – 4.62 (m, 2H), 3.94–3.90 (m, 2H), 3.85 – 3.67 (m, 1H), 3.15 (ddd, *J* = 14.4, 8.6, 1.7 Hz, 1H), 3.07 (ddd, *J* = 14.6, 3.1, 1.2 Hz, 1H), 2.54 (brs, 1H), 2.42 (s, 3H), 1.55 – 1.40 (m, 2H), 1.03 – 0.87 (m, 3H) ppm; <sup>13</sup>C NMR (126 MHz, CDCl<sub>3</sub>) δ 209.5, 143.6, 136.5, 129.8, 127.3, 85.9, 76.4, 71.0, 53.4, 48.5, 27.5, 21.5, 9.8 ppm; HRMS (ESI) calcd for C<sub>15</sub>H<sub>21</sub>NO<sub>3</sub>S [M+H]<sup>+</sup>: 296.1320; found: 296.1318.

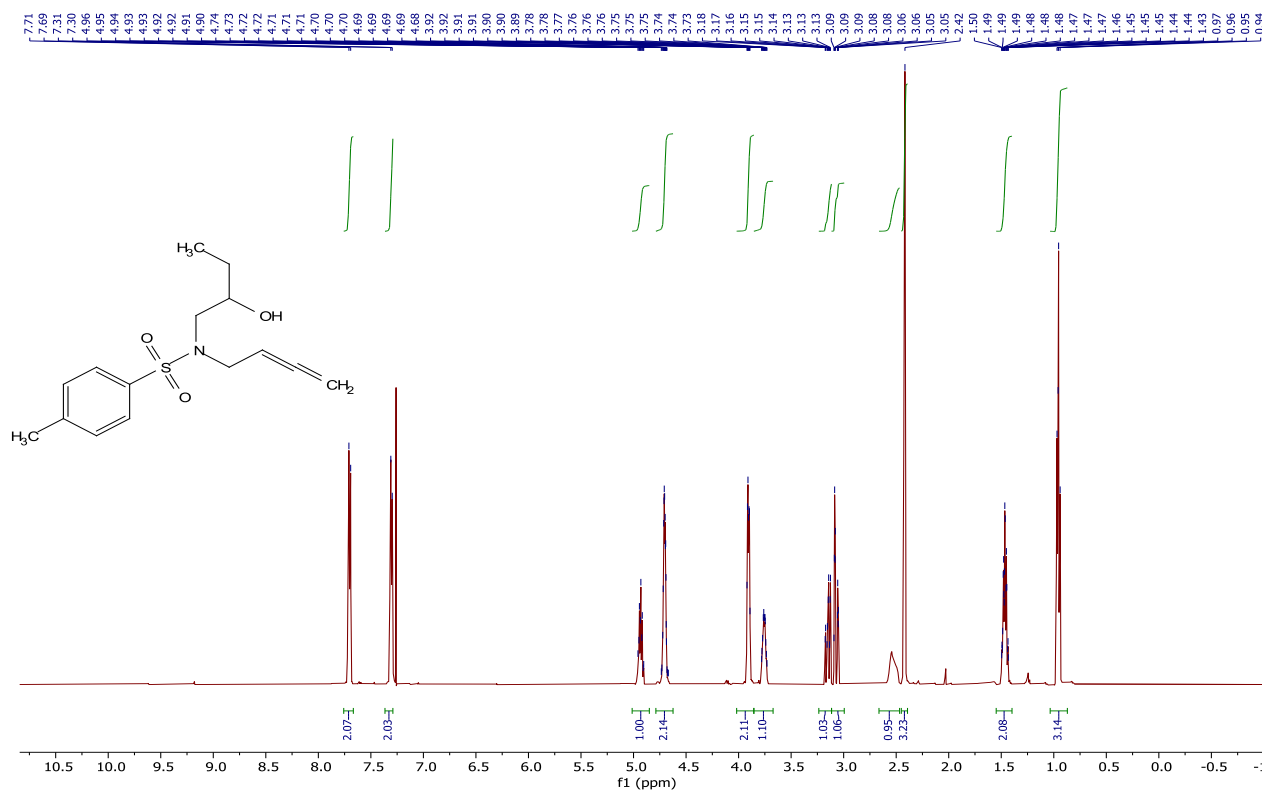

HaBtDe11-500802, Halimehjeni, AZH-304, CDCl<sub>3</sub>=77.1000

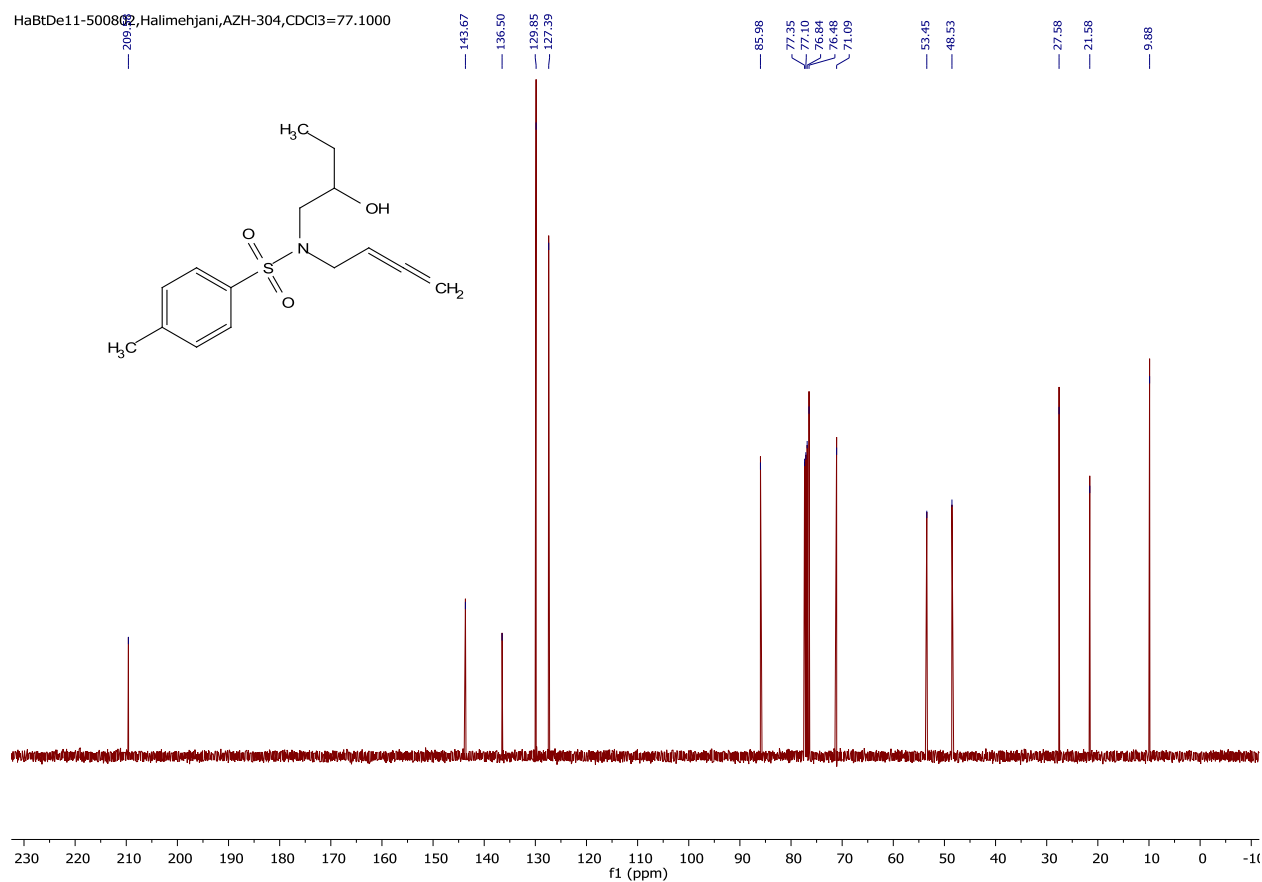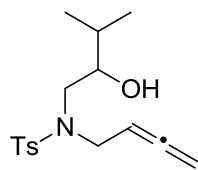

*N*-(buta-2,3-dien-1-yl)-*N*-(2-hydroxy-3-methylbutyl)-4-

*methylbenzenesulfonamide (1m)*: The reaction was carried out according to the general procedure using isopropylmagnesium bromide (2M in THF): <sup>1</sup>H NMR (400 MHz, Chloroform-*d*) δ 7.71 (d, *J* = 8.3 Hz, 2H), 7.31 (dd, *J* = 8.6, 0.7 Hz, 2H), 4.96–4.93 (m, 1H), 4.72–4.68 (m, 2H), 4.04 – 3.81 (m, 2H), 3.67 – 3.51 (m, 1H), 3.28 – 3.01 (m, 2H), 2.49 (d, *J* = 3.4 Hz, 1H), 2.42 (s, 3H), 1.70–1.67 (m, 1H), 0.94 (d, *J* = 6.8 Hz, 3H), 0.92 (d, *J* = 6.8 Hz, 3H) ppm; <sup>13</sup>C NMR (101 MHz, CDCl<sub>3</sub>) δ 209.6, 143.6, 136.6, 129.8, 127.4, 85.9, 76.4, 74.0, 51.5, 48.3, 31.8, 21.5, 18.6, 17.4 ppm; HRMS (ESI) calcd for C<sub>16</sub>H<sub>23</sub>NO<sub>3</sub>S [M+H]<sup>+</sup>: 310.1477; found: 310.1473.



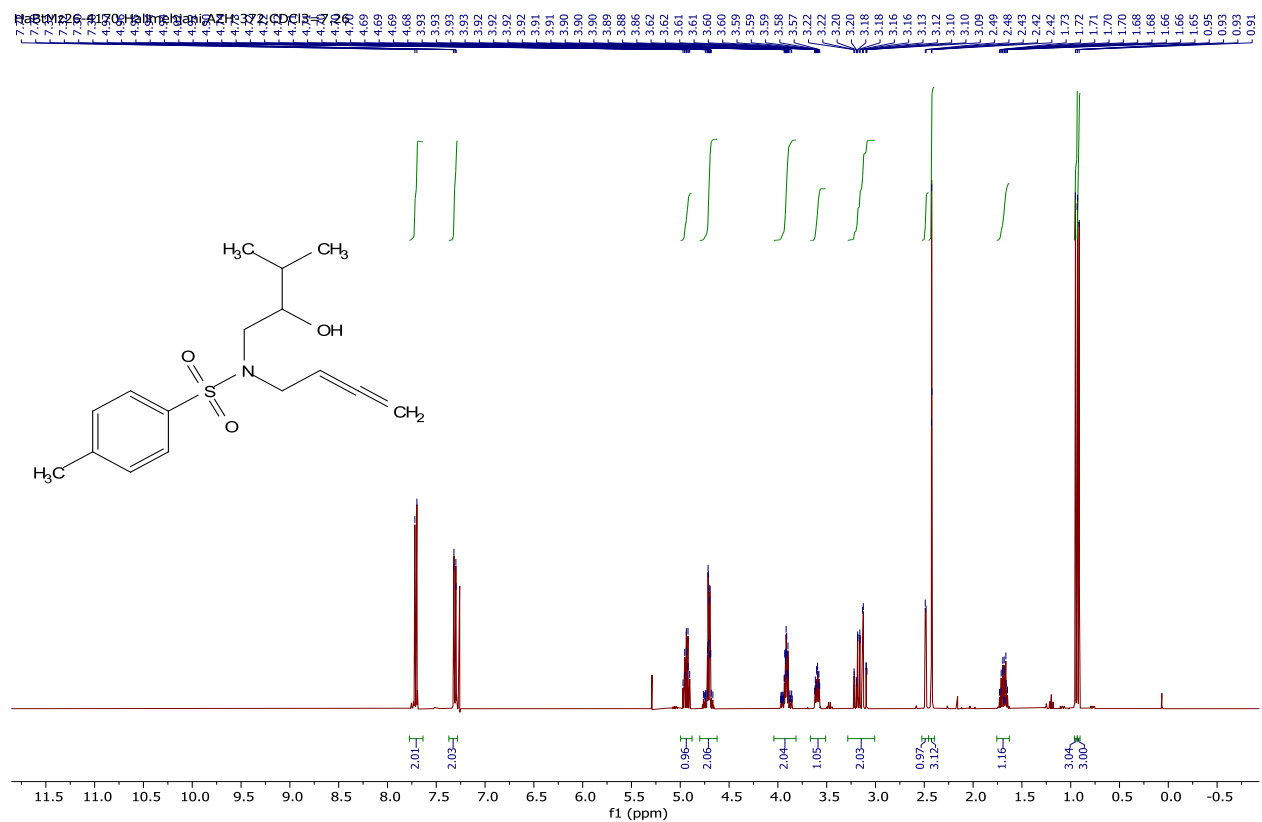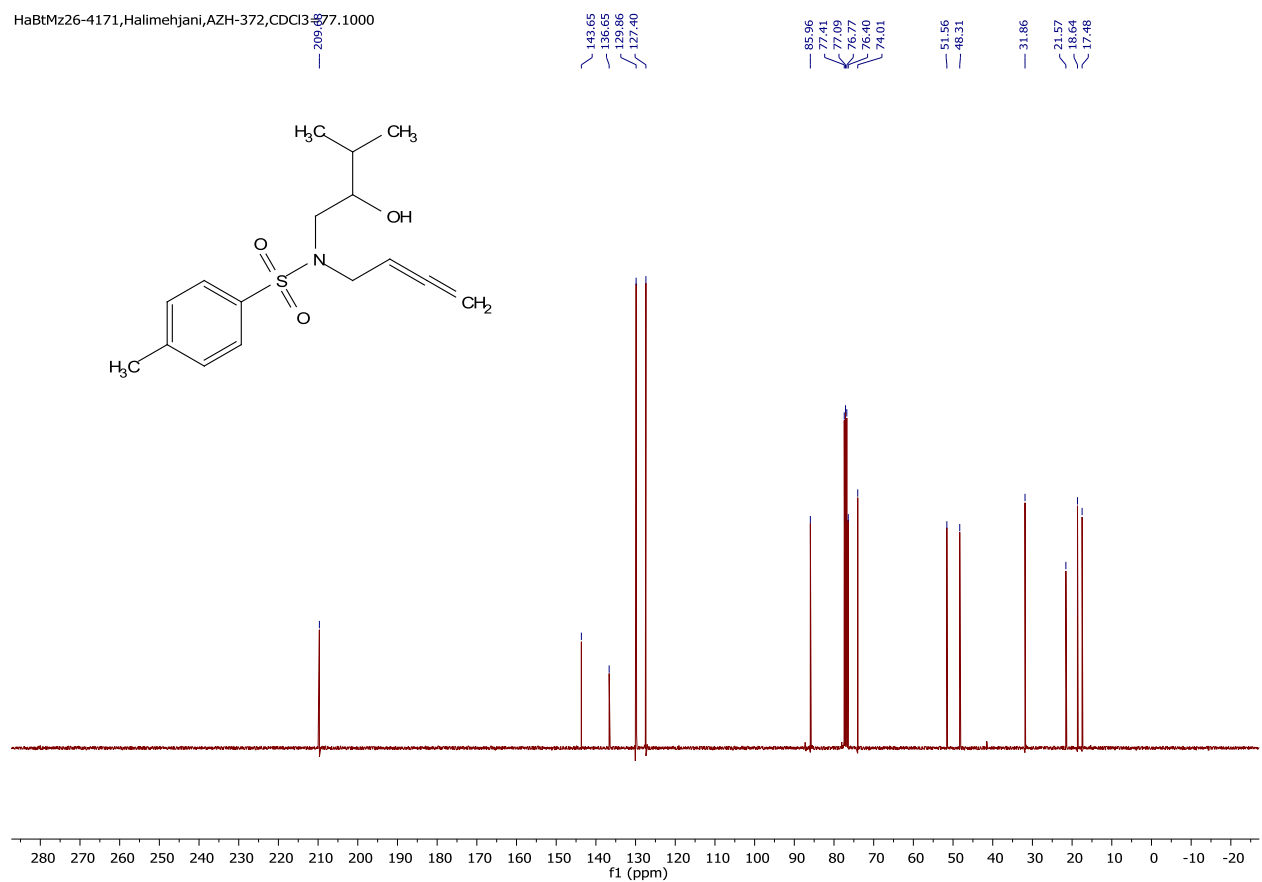

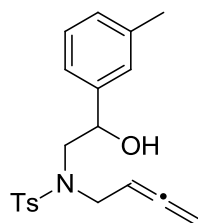

*N*-(buta-2,3-dien-1-yl)-*N*-(2-hydroxy-2-(*m*-tolyl)ethyl)-4-

*methylbenzenesulfonamide (1n)*: The reaction was carried out according to the general procedure using freshly prepared *m*-tolylmagnesium bromide:  $^1\text{H}$  NMR (500 MHz, Chloroform-*d*)  $\delta$  7.70 (d,  $J = 8.3$  Hz, 2H), 7.33 – 7.09 (m, 6H), 4.99 – 4.85 (m, 2H), 4.81 – 4.64 (m, 2H), 4.00 – 3.79 (m, 2H), 3.41 (dd,  $J = 14.8, 9.1$  Hz, 1H), 3.21 (dd,  $J = 14.8, 3.2$  Hz, 1H), 3.12 (brs, 1H), 2.41 (s, 3H), 2.35 (s, 3H) ppm;  $^{13}\text{C}$  NMR (126 MHz,  $\text{CDCl}_3$ )  $\delta$  209.6, 143.7, 141.2, 138.2, 136.5, 129.8, 128.6, 128.4, 127.3, 126.6, 123.0, 85.7, 76.4, 72.3, 55.2, 48.3, 21.5, 21.4 ppm; HRMS (ESI) calcd for  $\text{C}_{20}\text{H}_{23}\text{NO}_3\text{S}$   $[\text{M}+\text{H}]^+$ : 358.1477; found: 358.1472.

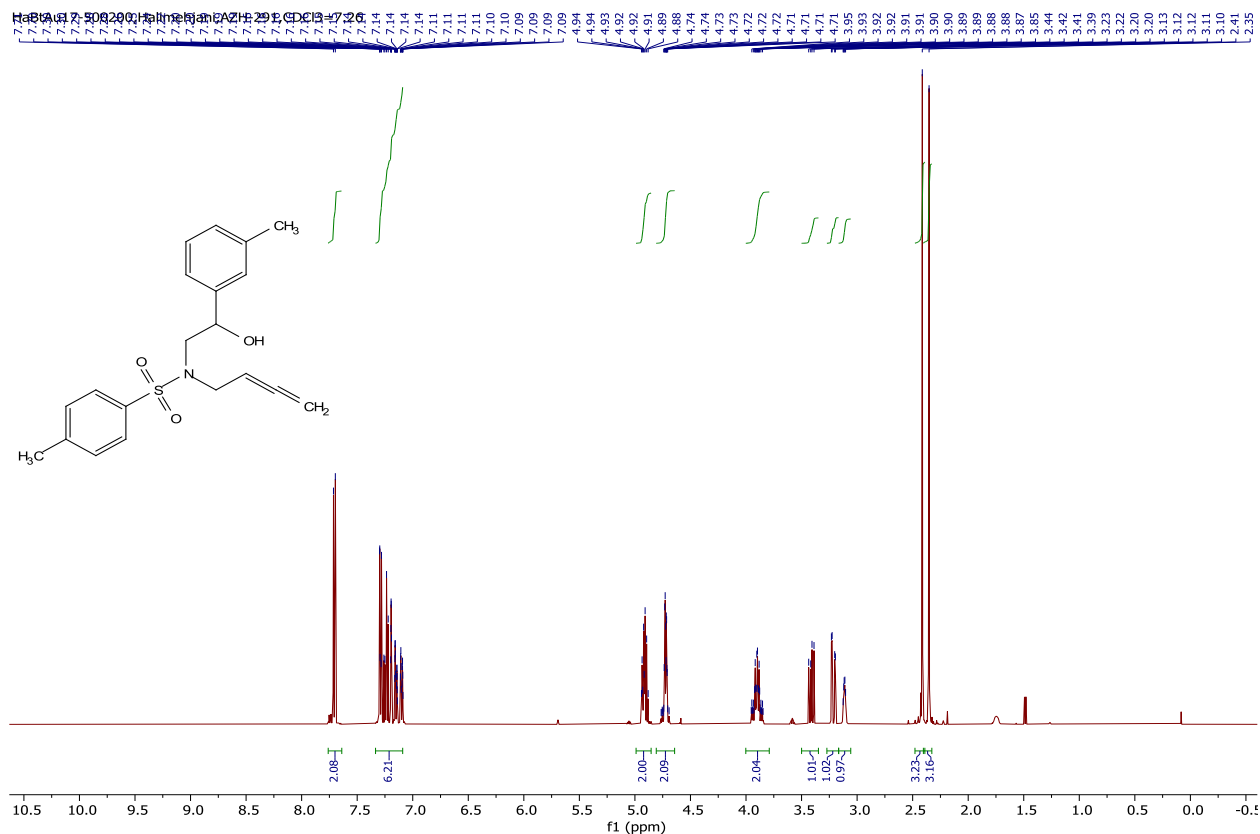

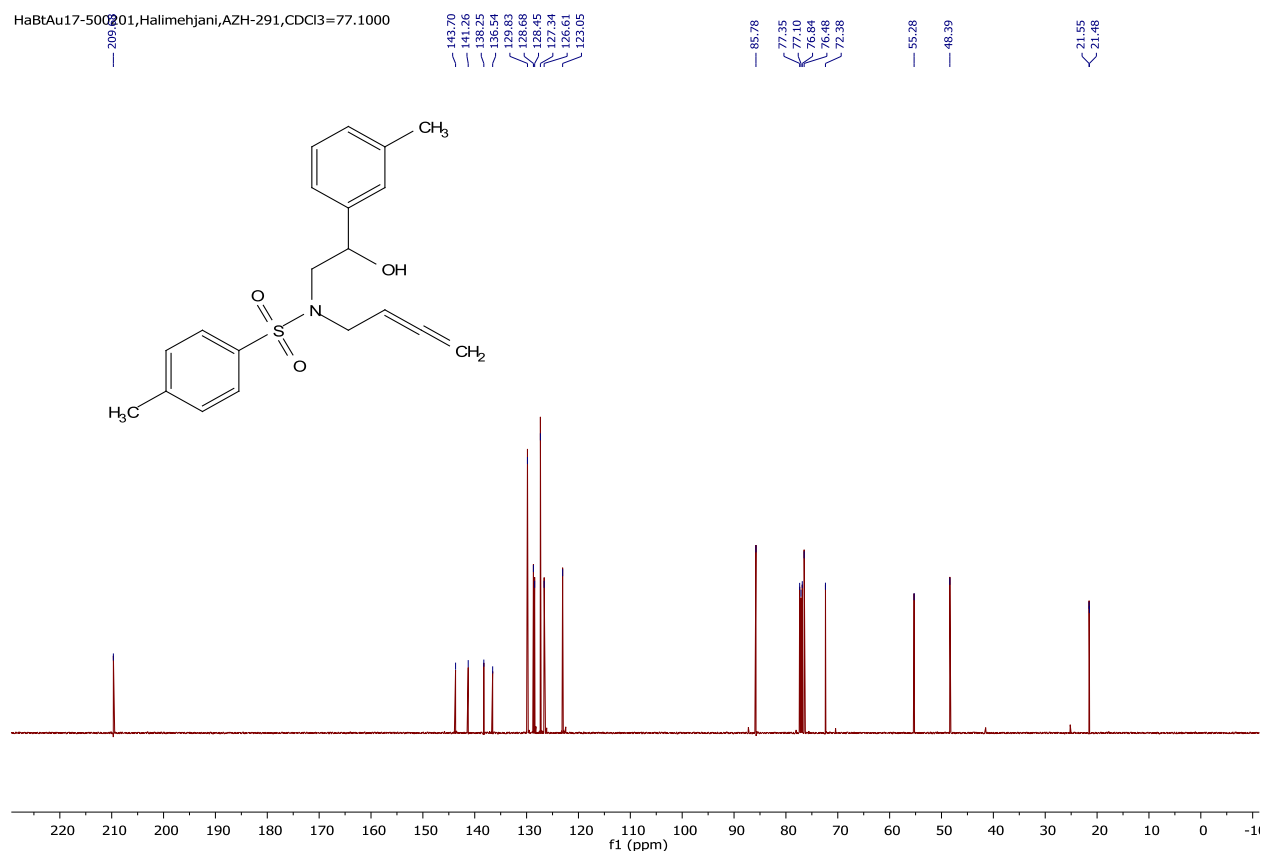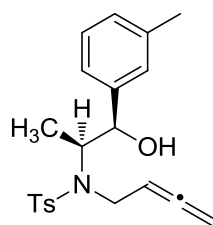

*N*-(buta-2,3-dien-1-yl)-*N*-((1*R*,2*S*)-1-hydroxy-1-(*m*-tolyl)propan-2-yl)-4-methylbenzenesulfonamide (**3a**): The reaction was carried out according to the general procedure using freshly prepared *m*-tolylmagnesium bromide. The crude mixture was obtained with *dr* ratio of 5.6:1. After purification, the major diastereomer **3a** was obtained in >19:1 *dr* ratio. <sup>1</sup>H NMR (500 MHz, Chloroform-*d*) δ 7.74 – 7.59 (m, 2H), 7.28 – 7.05 (m, 6H), 5.22–5.18 (m, 1H), 4.99 (t, *J* = 3.1 Hz, 1H), 4.79–4.75 (m, 2H), 4.07 – 3.95 (m, 2H), 3.92–3.88 (m, 1H), 2.57 (d, *J* = 3.3 Hz, 1H), 2.41 (s, 3H), 2.34 (s, 3H), 1.04 (d, *J* = 7.1 Hz, 3H) ppm; <sup>13</sup>C NMR (126 MHz, CDCl<sub>3</sub>) δ 208.6, 143.2, 141.8, 138.1, 137.9, 129.6, 128.3, 128.2, 127.2, 126.7, 123.1, 89.1, 77.3, 76.49, 59.8, 44.4, 21.5, 21.5, 11.3 ppm; HRMS (ESI) calcd for C<sub>21</sub>H<sub>25</sub>NO<sub>3</sub>S [M+H]<sup>+</sup>: 372.1633; found: 372.1629; [α]<sub>D</sub><sup>25</sup> = +4.79 (c = 0.71, CH<sub>2</sub>Cl<sub>2</sub>).

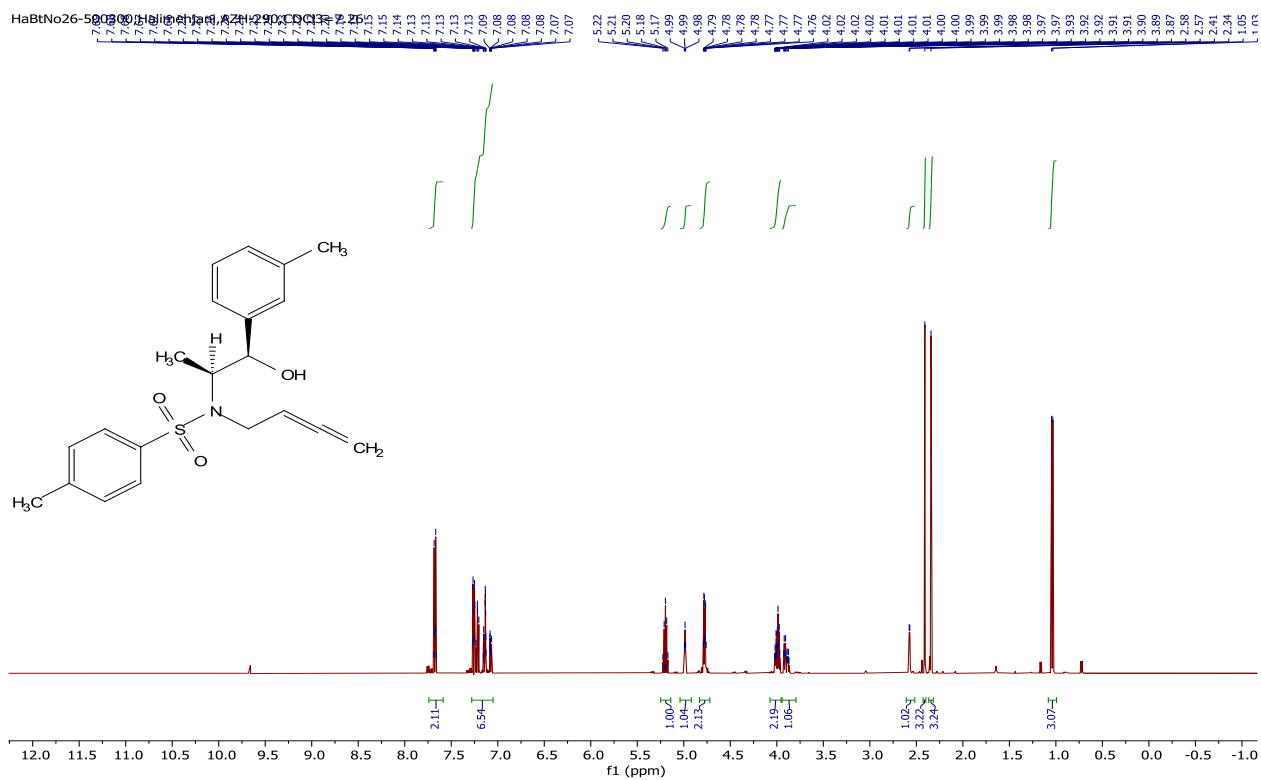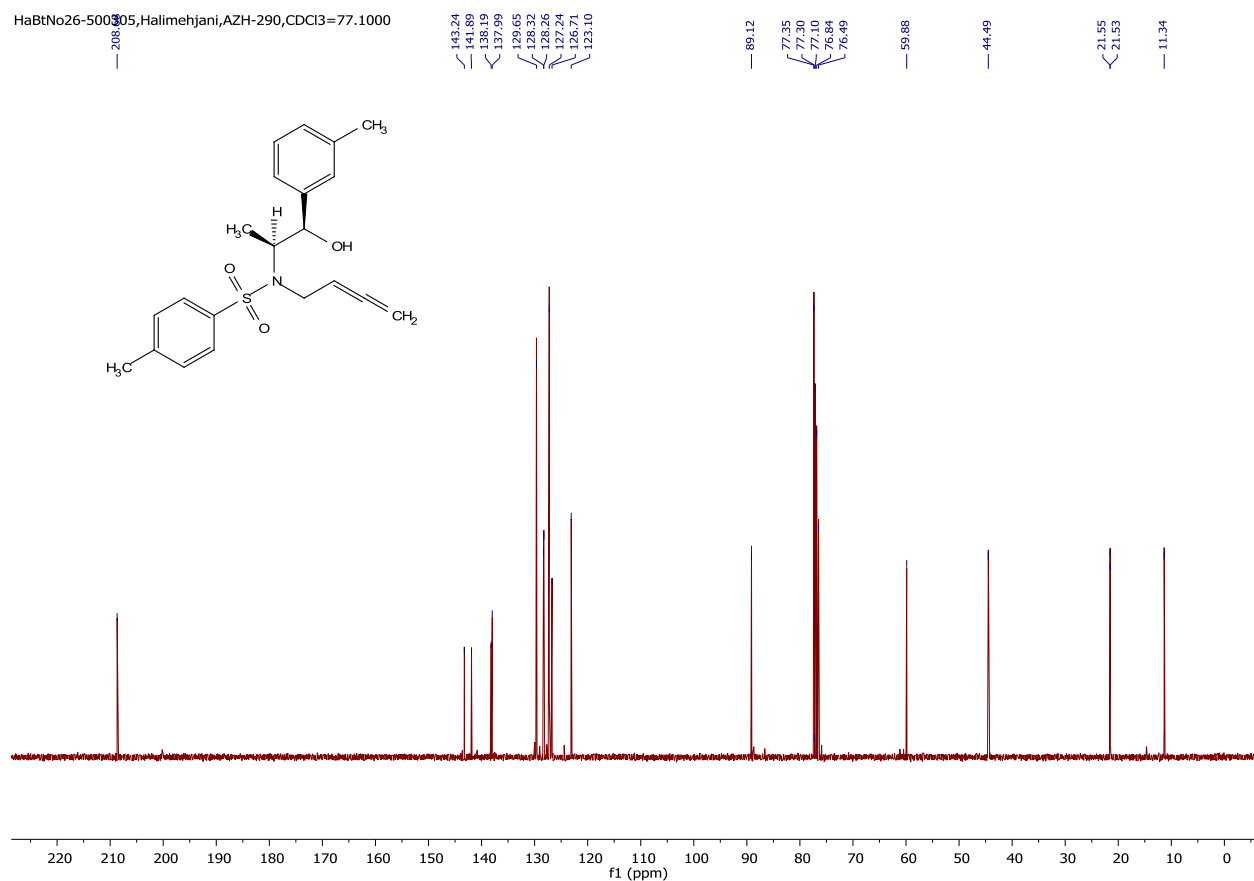

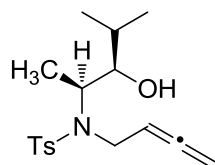

*N*-(buta-2,3-dien-1-yl)-*N*-((2*S*,3*R*)-3-hydroxy-4-methylpentan-2-yl)-4-methylbenzenesulfonamide (**3b**): The reaction was carried out according to the general procedure using isopropylmagnesium bromide (2M in THF). The crude mixture was obtained with *dr* ratio of >20:1.  $^1\text{H}$  NMR (500 MHz, Chloroform-*d*)  $\delta$  7.70 (d,  $J$  = 8.3 Hz, 2H), 7.35 – 7.20 (m, 2H), 5.26-5.23 (m, 1H), 4.78–4.74 (m, 2H), 4.03–3.98 (m, 1H), 3.94 (qd,  $J$  = 6.9, 5.0 Hz, 1H), 3.72 (ddt,  $J$  = 15.8, 7.8, 2.1 Hz, 1H), 3.43 (q,  $J$  = 5.5 Hz, 1H), 2.41 (s, 3H), 1.88 (d,  $J$  = 5.4 Hz, 1H), 1.84–1.80 (m, 1H), 0.99 (d,  $J$  = 7.0 Hz, 3H), 0.94–0.90 (m, 6H) ppm;  $^{13}\text{C}$  NMR (126 MHz,  $\text{CDCl}_3$ )  $\delta$  208.4, 143.2, 137.9, 129.6, 127.2, 89.4, 79.7, 76.4, 55.4, 43.7, 30.1, 21.5, 19.7, 16.9, 12.5 ppm; HRMS (ESI) calcd for  $\text{C}_{17}\text{H}_{25}\text{NO}_3\text{S}$   $[\text{M}+\text{H}]^+$ : 324.1633; found: 324.1628;  $[\alpha]_{\text{D}}^{25} = +42.90$  ( $c$  = 0.303,  $\text{CH}_2\text{Cl}_2$ ).

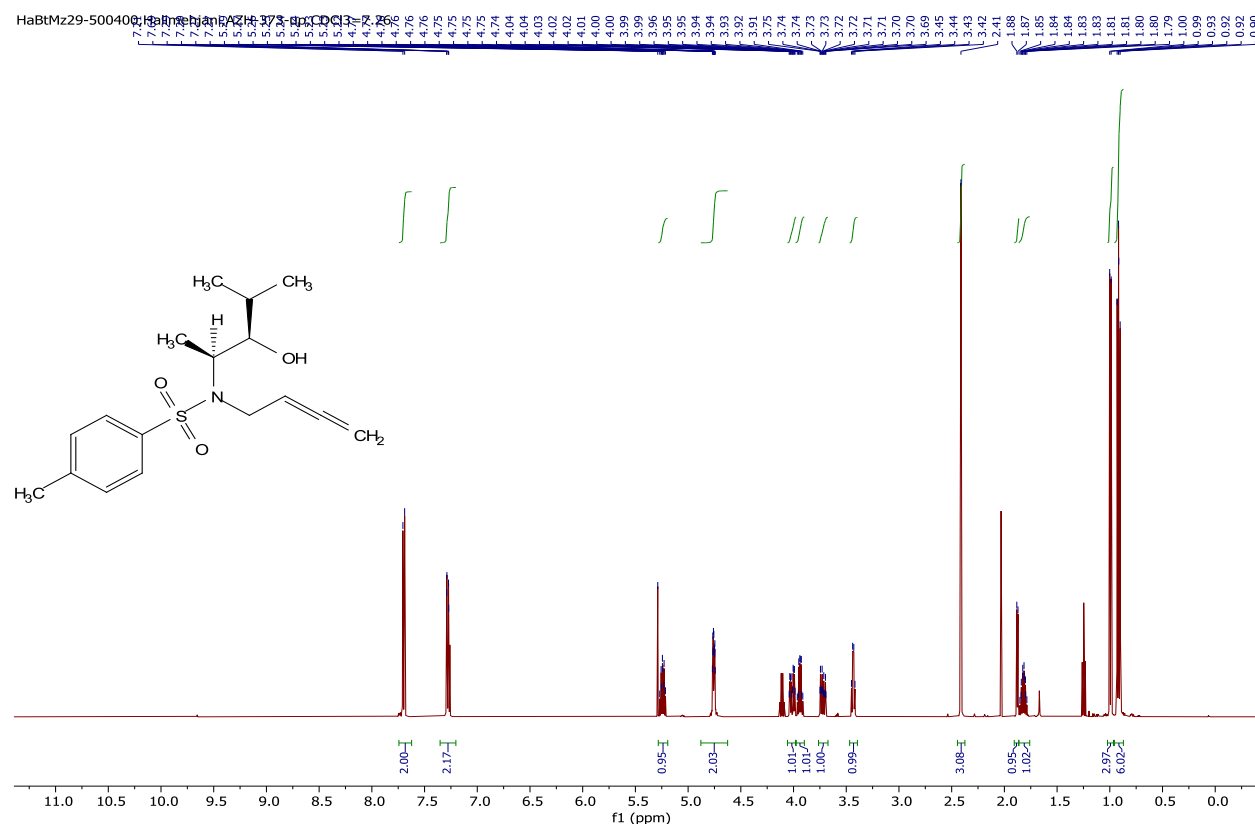

HaBtMz29-500405, Halimehjani, AZH-373-up, CDCl<sub>3</sub>=77.1000

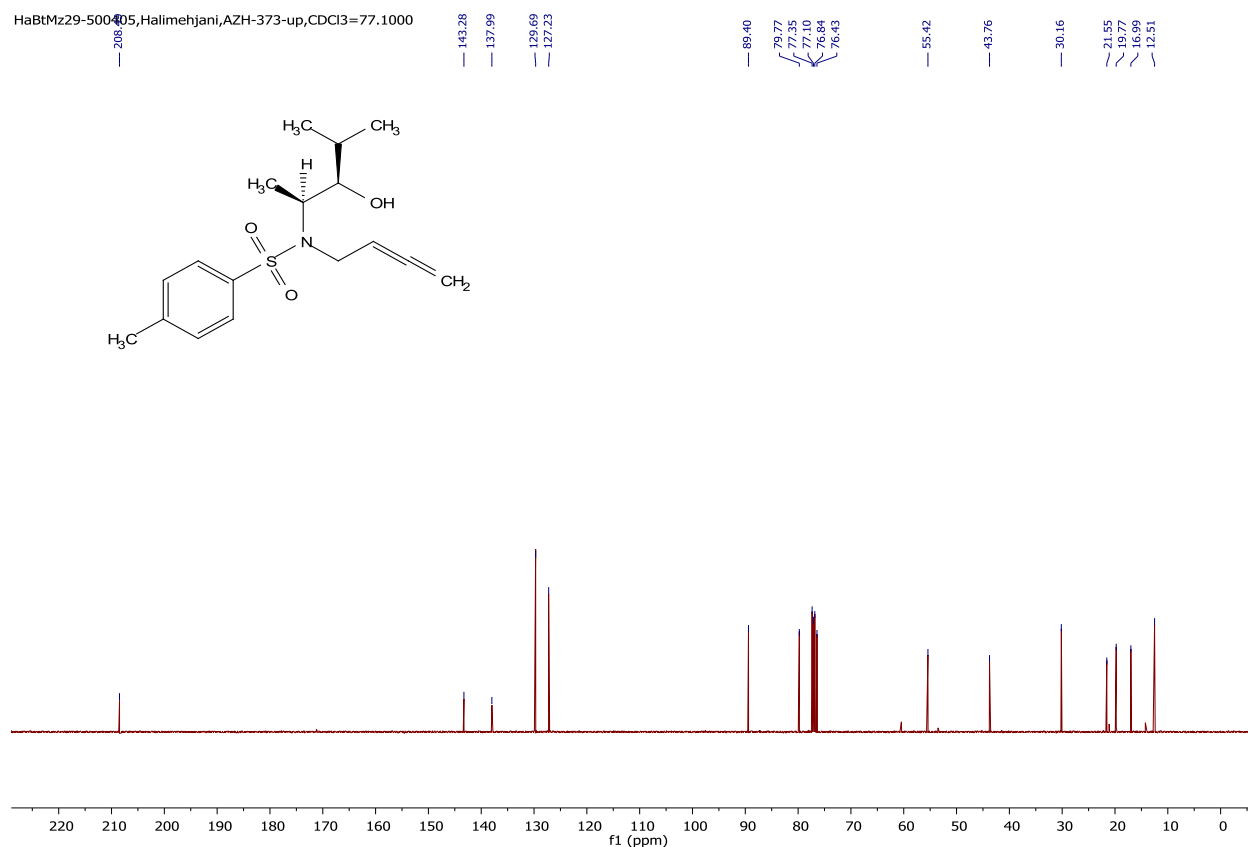

*N*-(buta-2,3-dien-1-yl)-*N*-((2*S*,3*R*)-3-hydroxypent-4-en-2-yl)-4-methylbenzenesulfonamide (**3c**): The reaction was carried out according to the general procedure using vinylmagnesium bromide (1M in THF). The crude mixture was obtained with *dr* ratio of 7.3:1. After purification, the major diastereomer **3c** was obtained in >19:1 *dr* ratio. <sup>1</sup>H NMR (500 MHz, Chloroform-*d*) δ 7.70 (d, *J* = 8.4 Hz, 2H), 7.28 (dd, *J* = 7.9, 0.8 Hz, 2H), 5.89–5.86 (m, 1H), 5.32 – 5.15 (m, 3H), 4.82 – 4.68 (m, 2H), 4.30 – 4.21 (m, 1H), 3.99–3.97 (m, 1H), 3.94 – 3.78 (m, 2H), 2.41 (s, 3H), 2.21 – 2.09 (m, 1H), 1.05 (d, *J* = 7.1 Hz, 3H) ppm; <sup>13</sup>C NMR (126 MHz, CDCl<sub>3</sub>) δ 208.6, 143.3, 138.1, 138.0, 129.7, 127.2, 116.5, 89.1, 76.4, 75.8, 57.9, 44.0, 21.5, 12.6 ppm; HRMS (ESI) calcd for C<sub>15</sub>H<sub>21</sub>NO<sub>3</sub>S [M+H]<sup>+</sup>: 308.1320; found: 308.1316; [α]<sub>D</sub><sup>25</sup> = +45.10 (c = 0.337, CH<sub>2</sub>Cl<sub>2</sub>).

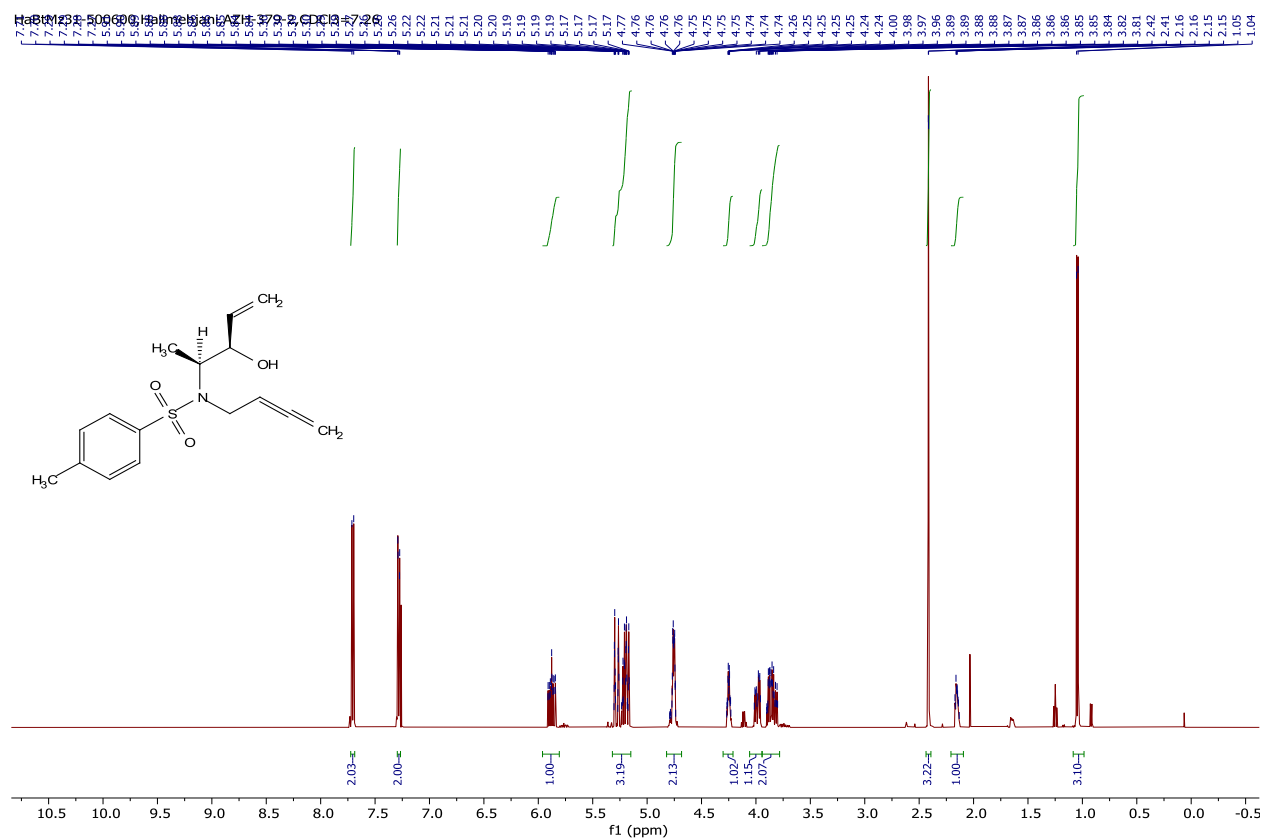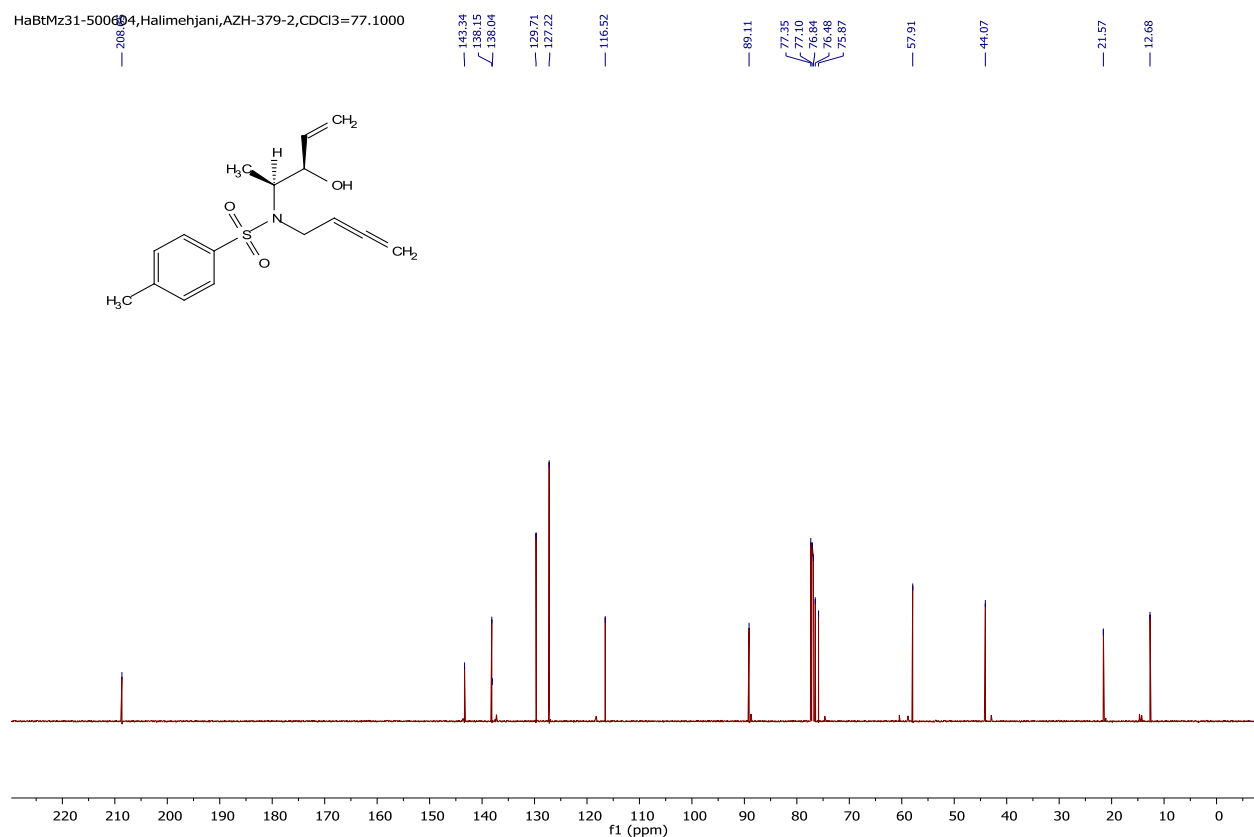

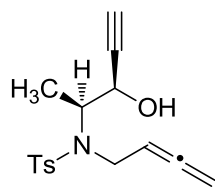

*N*-(buta-2,3-dien-1-yl)-*N*-((2*S*,3*R*)-3-hydroxypent-4-yn-2-yl)-4-methylbenzenesulfonamide (**3d**): The reaction was carried out according to the general procedure using ethynylmagnesium bromide (0.5 M in THF). The crude mixture was obtained with *dr* ratio of 9:1. After purification, the major diastereomer **3d** was obtained in >19:1 *dr* ratio. <sup>1</sup>H NMR (400 MHz, Chloroform-*d*)  $\delta$  7.74 (d, *J* = 8.3 Hz, 2H), 7.30 (dd, *J* = 8.6, 0.7 Hz, 2H), 5.23 (p, *J* = 6.7 Hz, 1H), 4.77 (dt, *J* = 6.7, 2.7 Hz, 2H), 4.51 (ddd, *J* = 6.1, 4.6, 2.3 Hz, 1H), 4.19 – 4.02 (m, 2H), 3.94 (ddt, *J* = 16.0, 6.9, 2.6 Hz, 1H), 2.49 – 2.45 (m, 2H), 2.43 (d, *J* = 0.8 Hz, 3H), 1.19 (d, *J* = 7.1 Hz, 3H) ppm; <sup>13</sup>C NMR (101 MHz, CDCl<sub>3</sub>)  $\delta$  208.8, 143.5, 137.8, 129.7, 127.4, 89.0, 82.2, 76.6, 74.9, 65.7, 57.6, 43.9, 21.6, 13.3 ppm; HRMS (ESI) calcd for C<sub>16</sub>H<sub>19</sub>NO<sub>3</sub>S [M+H]<sup>+</sup>: 306.1164; found: 306.1162; [ $\alpha$ ]<sub>D</sub><sup>25</sup> = +37.75 (c = 0.347, CH<sub>2</sub>Cl<sub>2</sub>).

HaBtAp21-4020, Halimehjani, AZH-412, CDCl<sub>3</sub> = 7.26

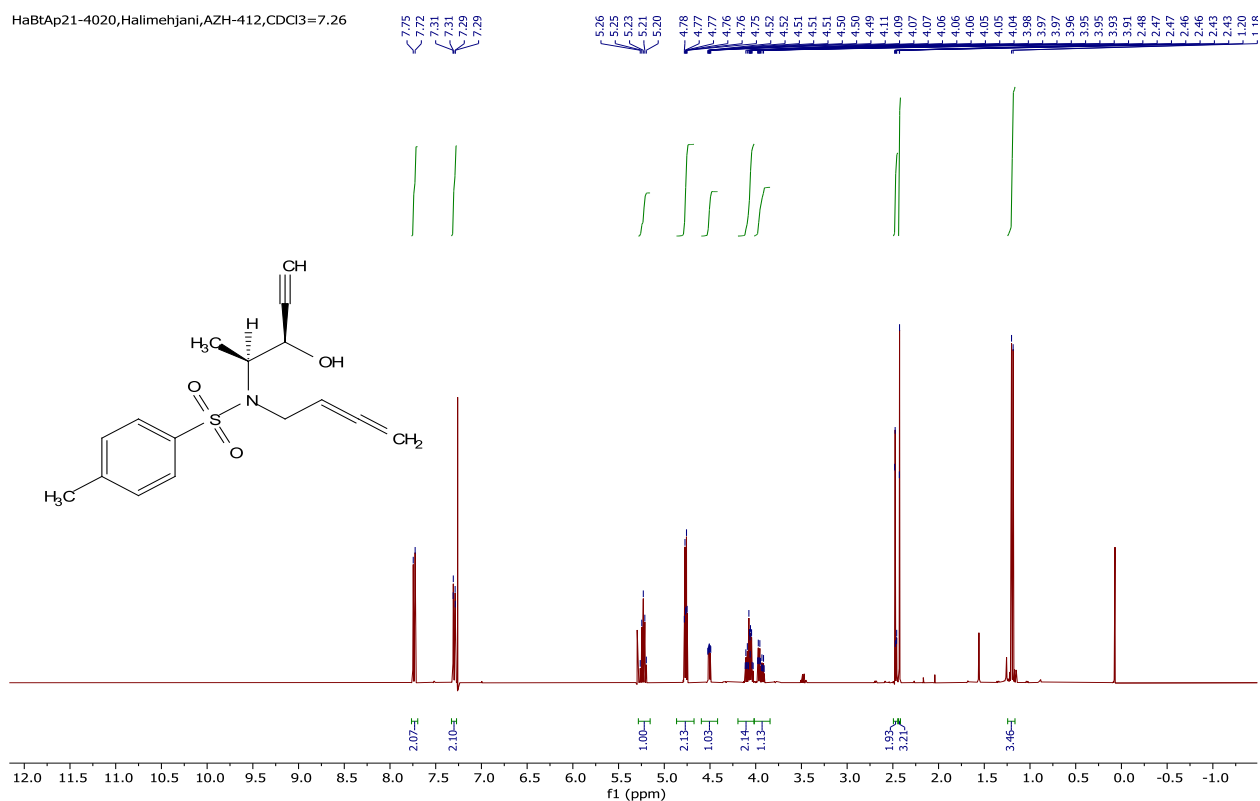



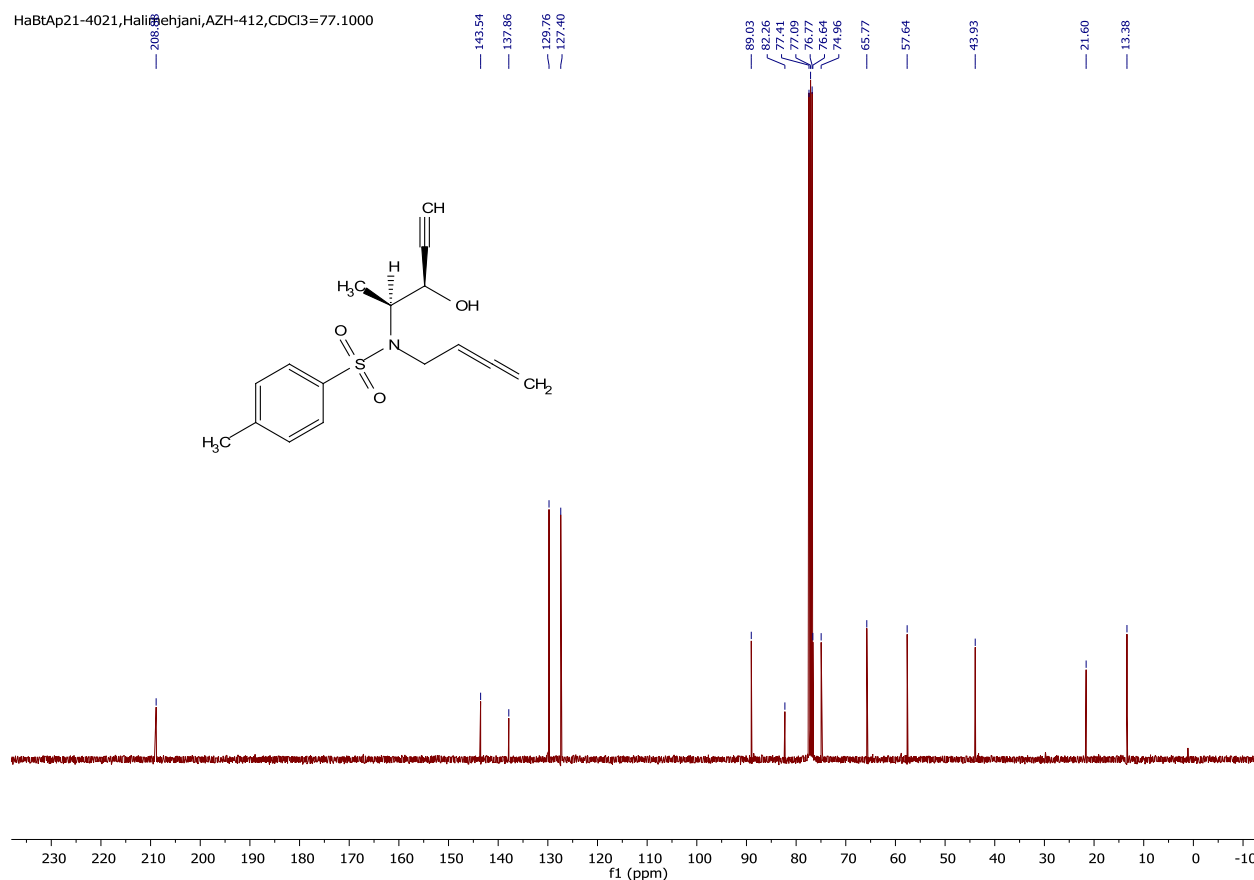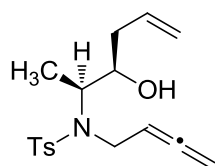

*N*-(buta-2,3-dien-1-yl)-*N*-((2*S*,3*R*)-3-hydroxyhex-5-en-2-yl)-4-

*methylbenzenesulfonamide* (**3e**): The reaction was carried out according to the general procedure using allylmagnesium bromide (1M in THF). The crude mixture was obtained with *dr* ratio of 4:1. After purification, the major diastereomer **3e** was obtained in >20:1 *dr* ratio and minor diastereomer **3f** was obtained in >19:1 *dr* ratio. <sup>1</sup>H NMR (500 MHz, Chloroform-*d*) δ 7.69 (d, *J* = 8.3 Hz, 2H), 7.33 – 7.26 (m, 2H), 5.82–5.78 (m, 1H), 5.27 – 5.09 (m, 3H), 4.75 (dddd, *J* = 6.3, 3.0, 2.0, 1.0 Hz, 2H), 4.00 (ddt, *J* = 15.6, 6.0, 3.0 Hz, 1H), 3.85 – 3.64 (m, 3H), 2.46 (dddt, *J* = 14.2, 6.7, 4.0, 1.4 Hz, 1H), 2.41 (s, 3H), 2.18–2.14 (m, 1H), 2.07 – 1.98 (m, 1H), 1.02 (d, *J* = 6.9 Hz, 3H) ppt; <sup>13</sup>C NMR (126 MHz, CDCl<sub>3</sub>) δ 208.6, 143.3, 137.9, 134.6, 129.7, 127.1, 118.6, 89.0, 76.4, 73.3, 57.5, 43.8, 39.2, 21.5, 12.8 ppm; HRMS (ESI) calcd for C<sub>17</sub>H<sub>23</sub>NO<sub>3</sub>S [M+H]<sup>+</sup>: 322.1477; found: 322.1473; [α]<sub>D</sub><sup>25</sup> = +45.78 (c = 0.38, CH<sub>2</sub>Cl<sub>2</sub>).

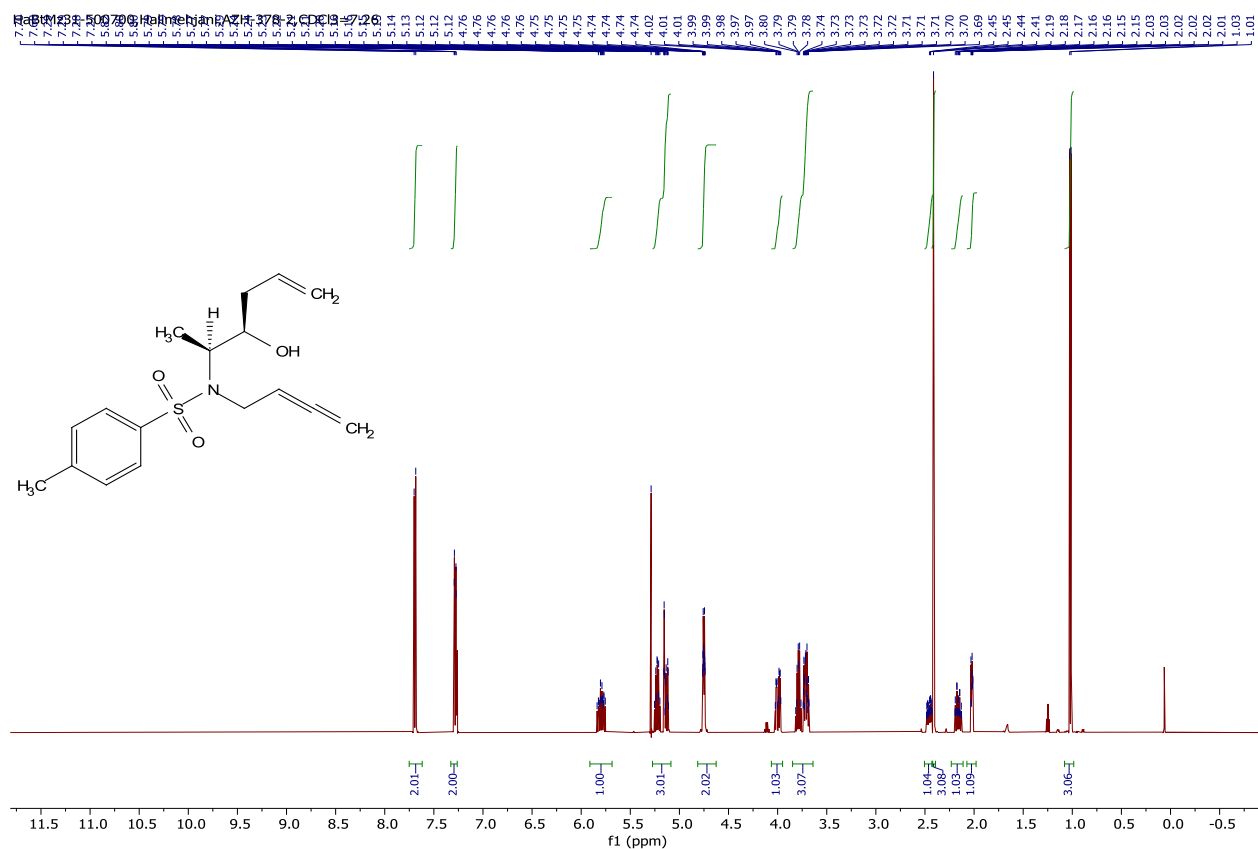

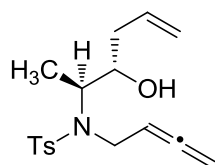

*N*-(buta-2,3-dien-1-yl)-*N*-((2*S*,3*S*)-3-hydroxyhex-5-en-2-yl)-4-methylbenzenesulfonamide (**3f**): This compound was obtained as minor diastereomer in the reaction of allylmagnesium bromide (1M in THF) with allenal. After purification, **3f** was obtained in >19:1 dr ratio.  $^1\text{H}$  NMR (500 MHz, Chloroform-*d*)  $\delta$  7.72 (d,  $J$  = 8.4 Hz, 2H), 7.31 – 7.28 (m, 2H), 6.01 – 5.85 (m, 1H), 5.35 – 5.25 (m, 1H), 5.16 – 5.08 (m, 2H), 4.79–4.76 (m, 2H), 3.99–3.96 (m, 1H), 3.81 – 3.57 (m, 3H), 2.43 – 2.35 (m, 5H), 2.19 – 2.10 (m, 1H), 0.95 (d,  $J$  = 6.9 Hz, 3H) ppm;  $^{13}\text{C}$  NMR (126 MHz,  $\text{CDCl}_3$ )  $\delta$  208.7, 143.5, 137.6, 134.1, 129.7, 127.3, 117.9, 88.8, 76.7, 71.9, 58.4, 43.1, 38.2, 21.6, 14.7 ppm; HRMS (ESI) calcd for  $\text{C}_{17}\text{H}_{23}\text{NO}_3\text{S}$   $[\text{M}+\text{H}]^+$ : 322.1477; found: 322.1471;  $[\alpha]_{\text{D}}^{25}$  = +57.08 ( $c$  = 0.24,  $\text{CH}_2\text{Cl}_2$ ).

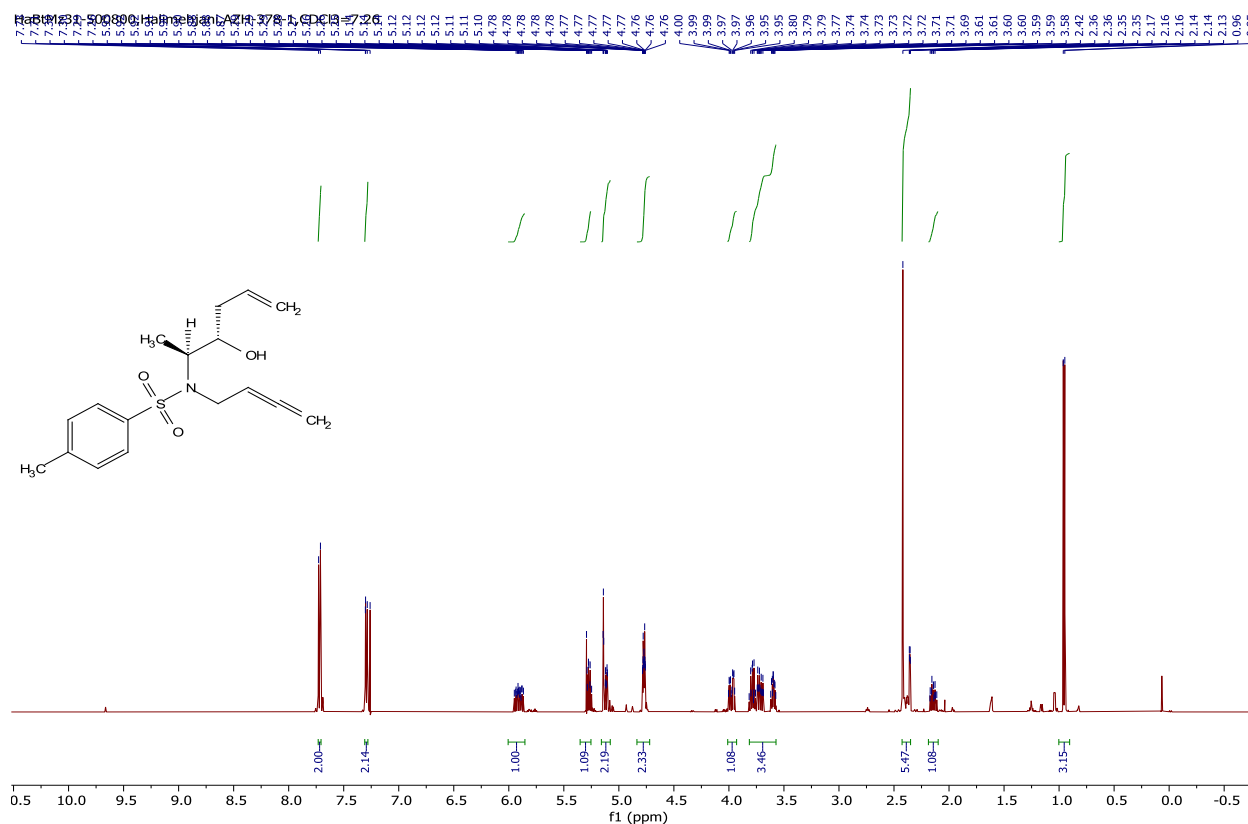

HaBtMz31-500805, Halimehjani, AZH-378-1, CDCl<sub>3</sub> = 77.1000

Chemical structure of compound 378-1 is shown above the spectrum. The structure is a substituted benzene ring with a methyl group (H<sub>3</sub>C) and a sulfonamide group (SO<sub>2</sub>NHCH<sub>2</sub>CH=CH<sub>2</sub>). The sulfonamide group is further substituted with a chiral center (C\*) bonded to a methyl group (H<sub>3</sub>C), a hydroxyl group (OH), and a vinyl group (CH=CH<sub>2</sub>).

<sup>1</sup>H NMR spectrum (CDCl<sub>3</sub>) showing chemical shifts (ppm) and integrations:

| Chemical Shift (ppm) | Integration |
|----------------------|-------------|
| 208.05               | 1.00        |
| 143.52               | 1.00        |
| 137.64               | 1.00        |
| 134.12               | 1.00        |
| 128.79               | 1.00        |
| 127.31               | 1.00        |
| 117.95               | 1.00        |
| 88.86                | 1.00        |
| 77.35                | 1.00        |
| 77.10                | 1.00        |
| 76.84                | 1.00        |
| 76.70                | 1.00        |
| 71.95                | 1.00        |
| 58.45                | 1.00        |
| 43.11                | 1.00        |
| 38.22                | 1.00        |
| 21.60                | 1.00        |
| 14.78                | 1.00        |

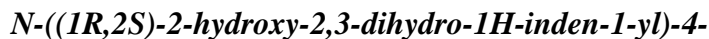[illegible]

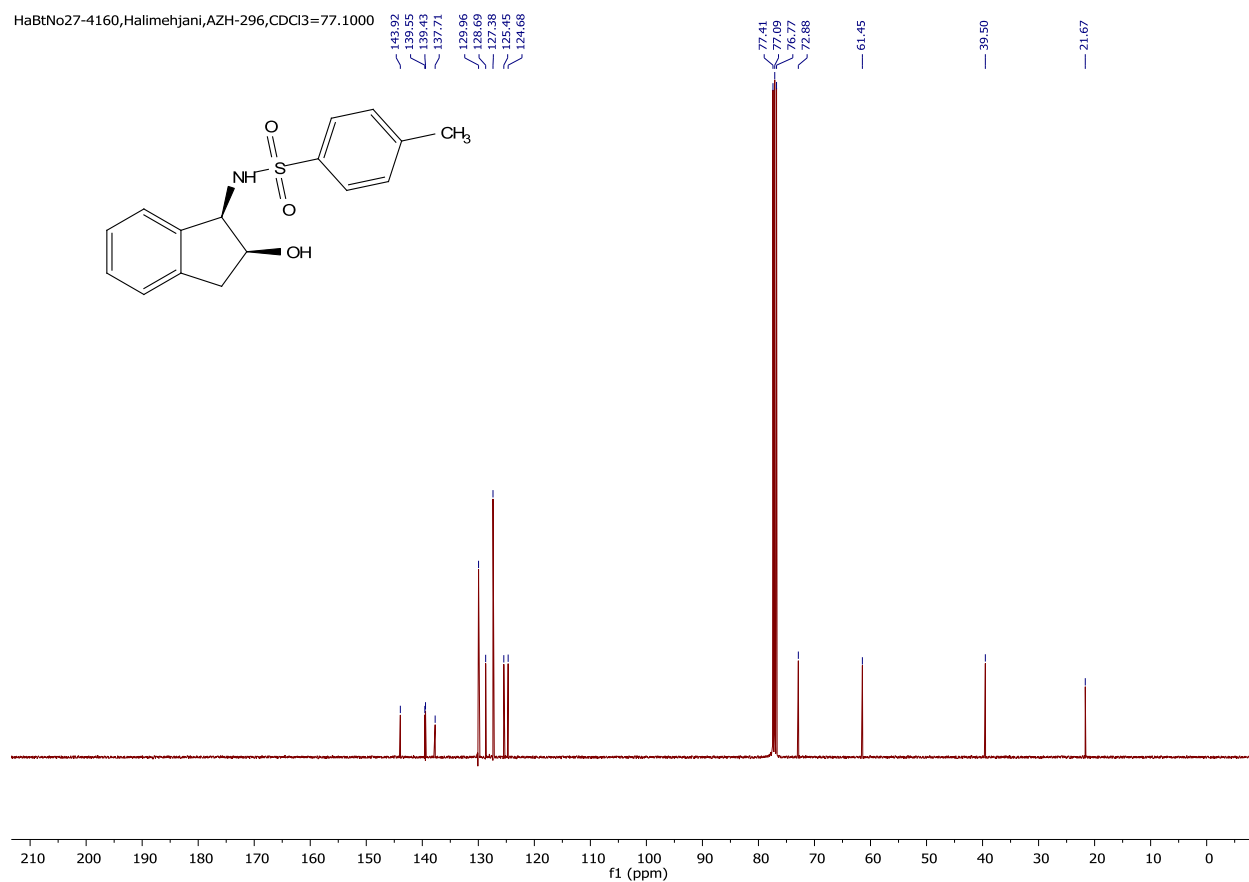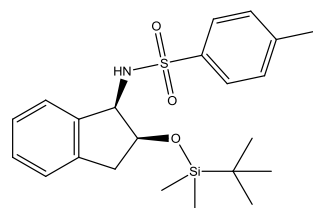

***N*-((1*R*,2*S*)-2-((*tert*-butyldimethylsilyl)oxy)-2,3-dihydro-1*H*-inden-1-**

**yl)-4-methylbenzenesulfonamide:** *tert*-Butyldimethylchlorosilane (1.2 equiv) was added portion wise to a solution of tosylamide (1 equiv) and imidazole (1.2 equiv) in dichloromethane (5 mL/mmol), and the mixture was stirred at rt for 4 h. The reaction was quenched with water and the organic phase was separated. The aqueous phase was extracted two more times with CH<sub>2</sub>Cl<sub>2</sub> (2 × 3 mL/mmol). The combined organic phases was dried with MgSO<sub>4</sub> and concentrated in vacuum to give the crude product. The crude product was applied in the next step without further purification.

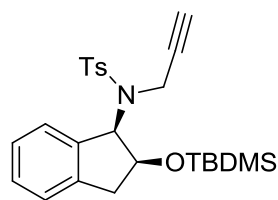

***N-((1R,2S)-2-((tert-butyldimethylsilyl)oxy)-2,3-dihydro-1H-inden-1-yl)-4-methyl-N-(prop-2-yn-1-yl)benzenesulfonamide***: was prepared according to general procedure 2 and was applied in the next step without further purification.

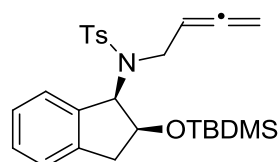

***N-(buta-2,3-dien-1-yl)-N-((1R,2S)-2-((tert-butyldimethylsilyl)oxy)-2,3-dihydro-1H-inden-1-yl)-4-methylbenzenesulfonamide***: was prepared according to general procedure 3 starting from the corresponding silylated alkynol and were applied directly in the desilylation reaction as described below:

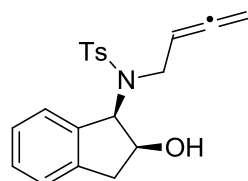

***N-(buta-2,3-dien-1-yl)-N-((1R,2S)-2-hydroxy-2,3-dihydro-1H-inden-1-yl)-4-methylbenzenesulfonamide (3g)***: A stirred solution of silylated allenol (1 equiv) in THF (15 mL/mmol) was cooled to 0 °C and treated with *n*-Bu<sub>4</sub>NF (2.5 equiv, 1 M in THF). The reaction was stirred for 1 hour at 0 °C then partitioned between H<sub>2</sub>O and Et<sub>2</sub>O. The layers were separated and the aqueous layer was extracted with Et<sub>2</sub>O. The combined organic layers were washed with brine, dried over MgSO<sub>4</sub>, and evaporated under reduced pressure. Purification was carried out by silica gel chromatography using EtOAc:*n*-pentane (3:7).<sup>13</sup> <sup>1</sup>H NMR (500 MHz, Chloroform-*d*) δ 7.84 (d, *J* = 8.3 Hz, 2H), 7.42 – 7.31 (m, 2H), 7.25 – 7.00 (m, 3H), 6.57 (dd, *J* = 7.7, 1.0 Hz, 1H), 5.26 – 5.06 (m, 2H), 4.73 – 4.44 (m, 3H), 3.82 – 3.60 (m, 2H), 3.21 (dd, *J* = 16.5, 7.4 Hz, 1H), 3.04 – 2.88 (m, 1H), 2.66 (d, *J* = 3.9 Hz, 1H), 2.46 (s, 3H) ppm; <sup>13</sup>C NMR (126 MHz, CDCl<sub>3</sub>) δ 208.5, 143.7, 141.1, 137.4, 136.8, 129.8, 129.1, 127.4, 127.0, 125.7, 125.4, 88.8, 76.1, 72.2, 64.9, 45.3, 39.4, 21.6 ppm; HRMS (ESI) calcd for C<sub>20</sub>H<sub>21</sub>NO<sub>3</sub>S [M+Na]<sup>+</sup>: 378.1140; found: 378.1137; [α]<sub>D</sub><sup>25</sup> = -96.64 (c = 0.835, CH<sub>2</sub>Cl<sub>2</sub>).

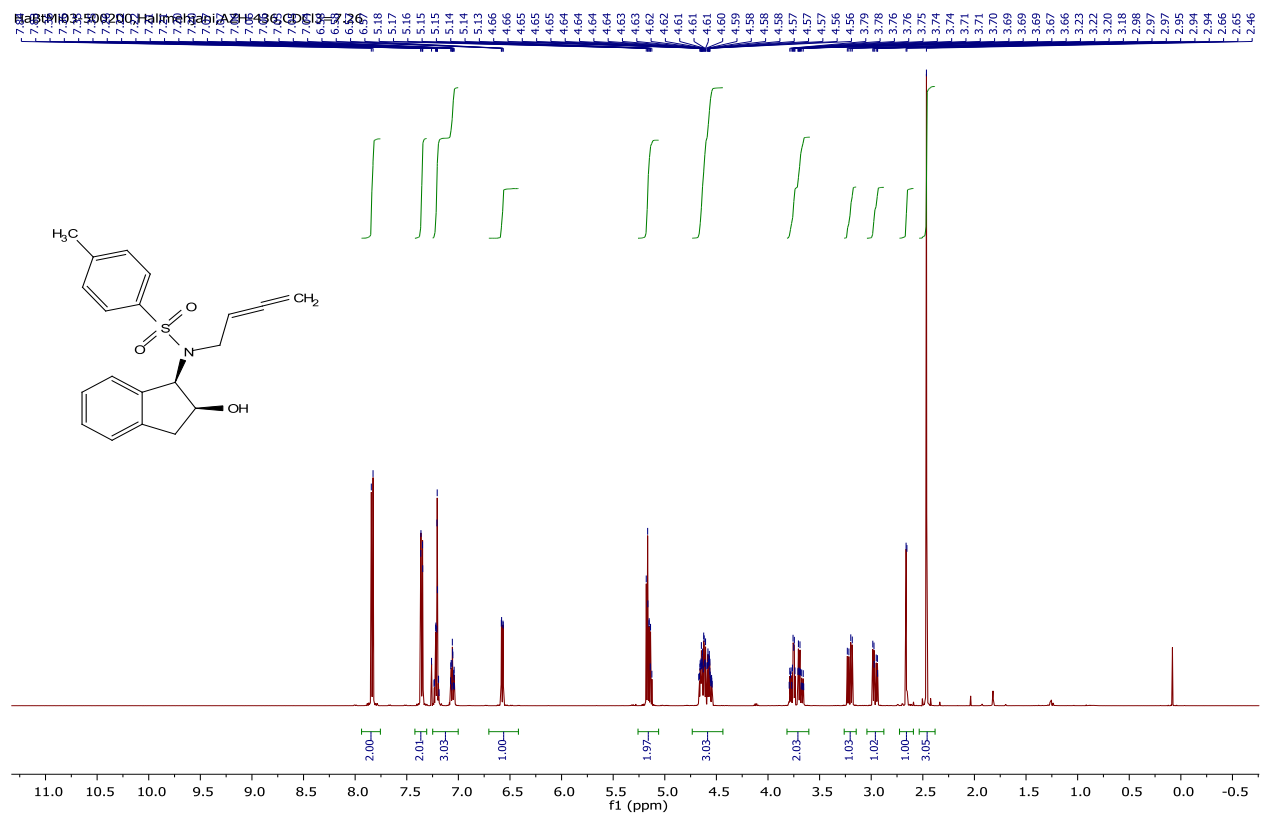



## Synthesis of functionalized morpholines and their characterization data

### General procedure 4: Synthesis of morpholines 2a-n and 4a-h

A screw-cap Schlenk tube was flame-dried under vacuum, backfilled with argon, and cooled to r.t. using a standard Schlenk line apparatus. The Schlenk tube was charged with [Rh(COD)Cl]<sub>2</sub> (1.5 mg, 0.003 mmol, 2 mol%), DPEphos (3.3 mg, 0.006 mmol, 4 mol %) and chloroacetic acid (2.8 mg, 20 mol%). The tube was placed on the Schlenk line to evacuate and backfilled with argon three times. Then, dichloroethane (0.75 mL, 0.2 M) and an allenol (0.15 mmol) were added under a flow of argon and the tube was sealed by a screw cap and the resulting mixture was stirred at 55 °C for 16 h. The solvent was removed under reduced pressure and the residue was purified by chromatography on silica gel using *n*-pentane:EtOAc (9:1).

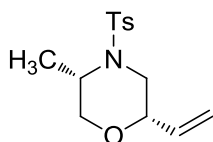

(2*S*,5*S*)-5-methyl-4-tosyl-2-vinylmorpholine (**2a**): <sup>1</sup>H NMR (500 MHz, Chloroform-*d*) δ 7.69 (d, *J* = 8.4 Hz, 2H), 7.30 (d, *J* = 8.0 Hz, 2H), 5.76 (ddd, *J* = 17.4, 10.7, 5.5 Hz, 1H), 5.34 (dt, *J* = 17.4, 1.4 Hz, 1H), 5.23 (dt, *J* = 10.7, 1.3 Hz, 1H), 4.04 – 3.92 (m, 1H), 3.87–3.83 (m, 1H), 3.68 – 3.65 (m, 2H), 3.63–3.58 (m, 1H), 2.87 (dd, *J* = 13.0, 10.9 Hz, 1H), 2.43 (s, 3H), 1.09 (d, *J* = 7.0 Hz, 3H) ppm; <sup>13</sup>C NMR (126 MHz, CDCl<sub>3</sub>) δ 143.5, 137.6, 134.8, 129.8, 127.1, 117.8, 76.2, 71.2, 48.2, 44.3, 21.6, 13.7 ppm; HRMS (ESI) calcd for C<sub>14</sub>H<sub>19</sub>NO<sub>3</sub>S [M+H]<sup>+</sup>: 282.1164; found: 282.1161; **HPLC** (L-C4 column, Heptane/Isopropanol = 90:10, 0.5 mL/min) *t*<sub>R</sub> = 16.51 min (minor), *t*<sub>R</sub> = 19.48 min (major), >99% ee; [*α*]<sub>D</sub><sup>25</sup> = +26.28 (c = 0.70, CH<sub>2</sub>Cl<sub>2</sub>).

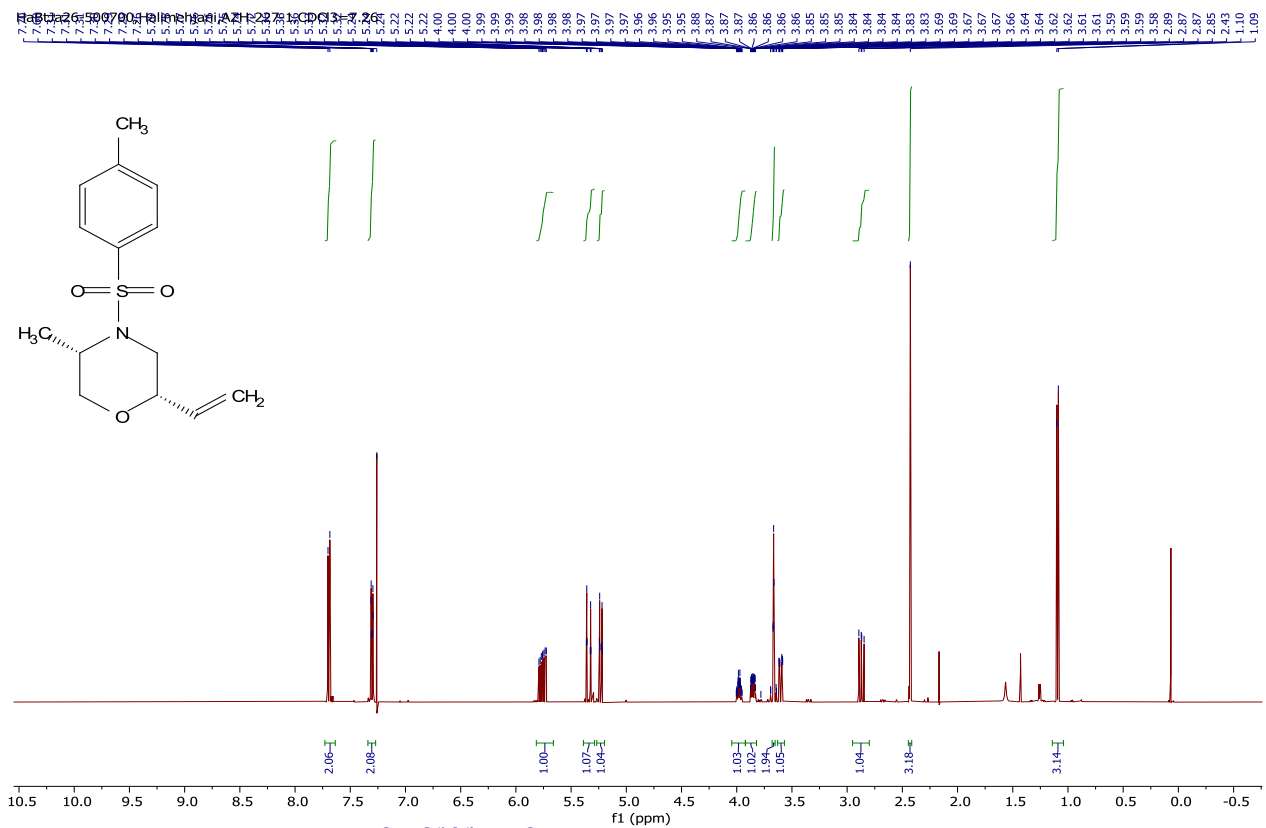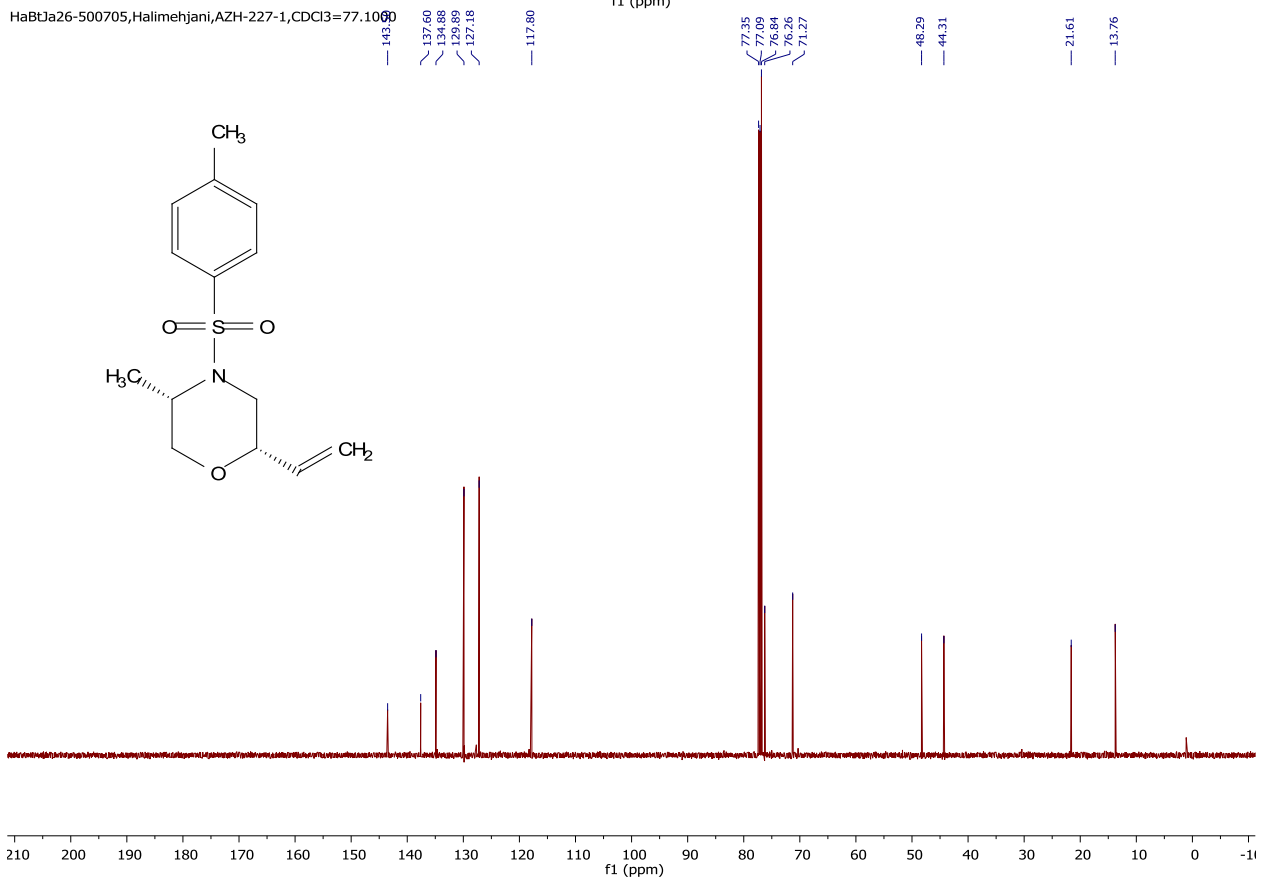

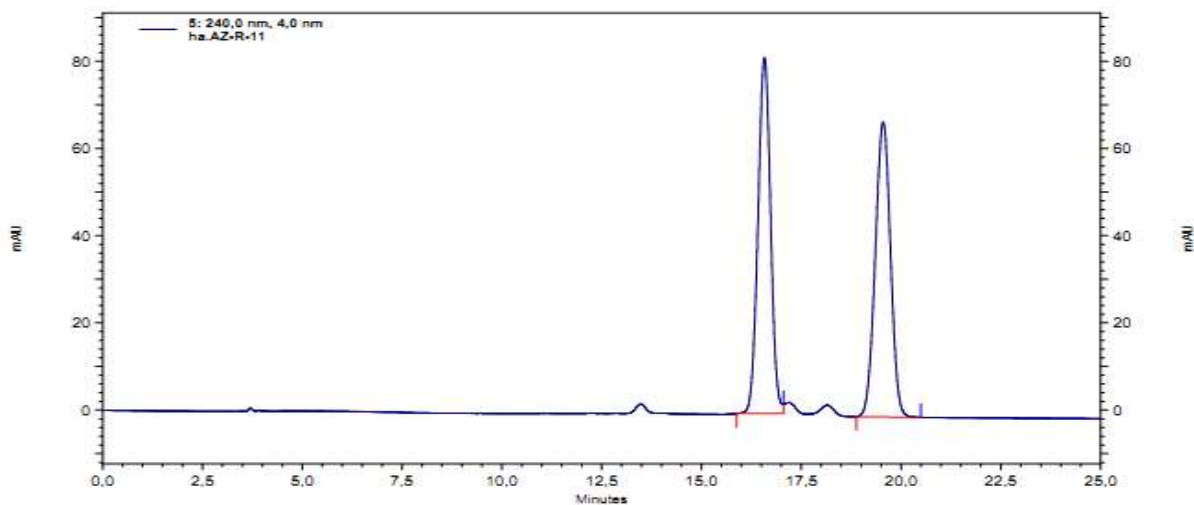

5: 240,0 nm, 4,0 nm

Results

| Peak Number | Retention Time | Area Percent | Area      |
|-------------|----------------|--------------|-----------|
| 1           | 16,577         | 49,943       | 240675465 |
| 2           | 19,548         | 50,057       | 241228141 |
| Totals      |                | 100,000      | 481903606 |

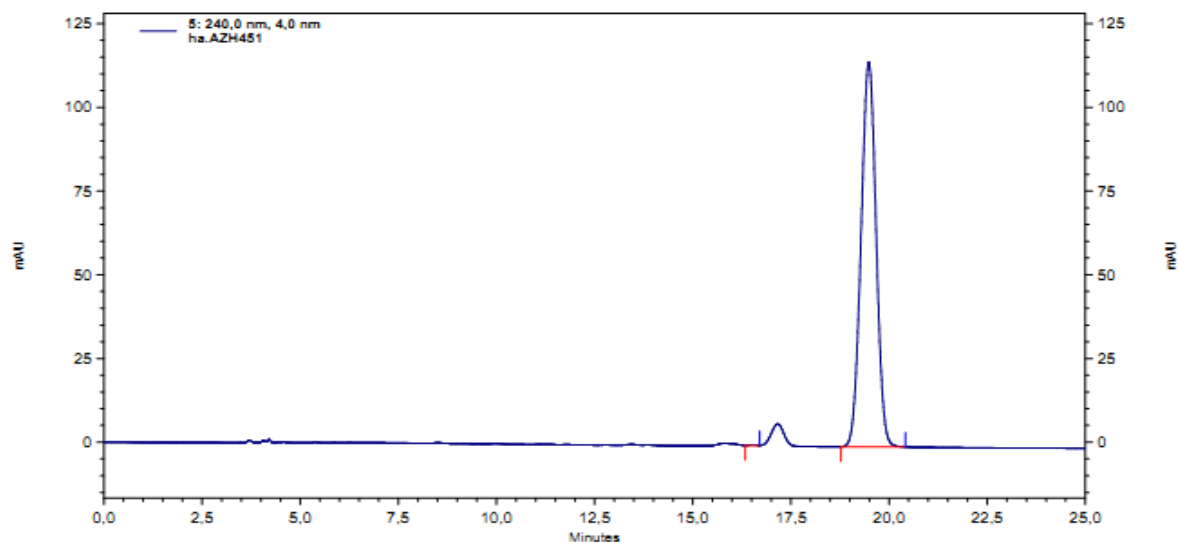

5: 240,0 nm, 4,0 nm

Results

| Peak Number | Retention Time | Area Percent | Area      |
|-------------|----------------|--------------|-----------|
| 1           | 16,507         | 0,059        | 244800    |
| 2           | 19,483         | 99,941       | 411366221 |
| Totals      |                | 100,000      | 411611021 |

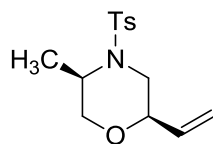

For (2*R*,5*R*)-5-methyl-4-tosyl-2-vinylmorpholine (**2b**): **HPLC** (L-C4 column, Heptane/Isopropanol = 90:10, 0.5 mL/min)  $t_R$  = 16.82 min (major),  $t_R$  = 19.92 min (minor), >99% ee;  $[\alpha]_D^{25}$  = -26.28 ( $c$  = 0.15, CH<sub>2</sub>Cl<sub>2</sub>).

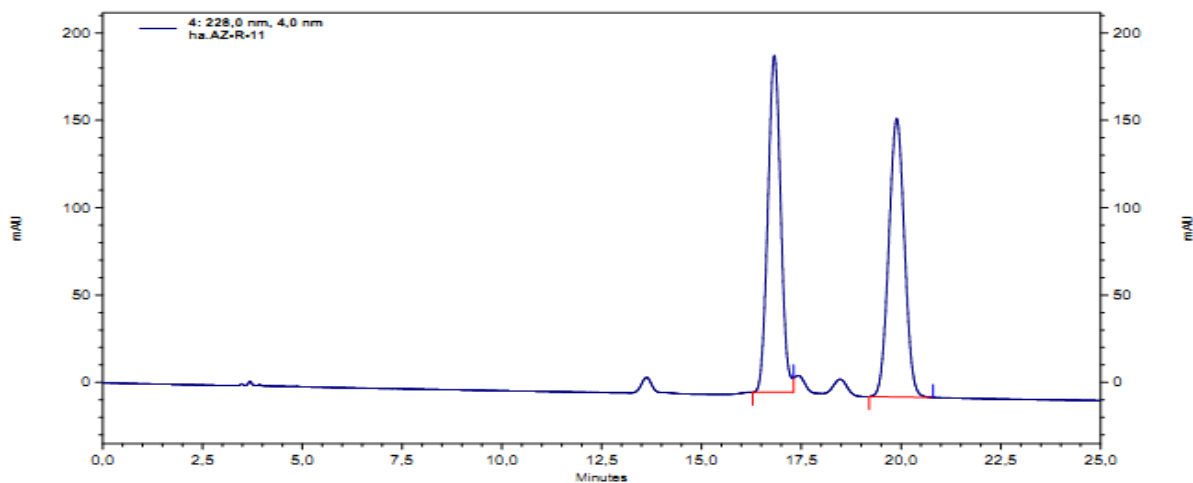

4: 228,0 nm, 4,0 nm

Results

| Peak Number | Retention Time | Area Percent | Area      |
|-------------|----------------|--------------|-----------|
| 1           | 16,825         | 49,810       | 579599920 |
| 2           | 19,890         | 50,190       | 584023461 |

|        |  |         |            |
|--------|--|---------|------------|
| Totals |  | 100,000 | 1163623381 |
|--------|--|---------|------------|

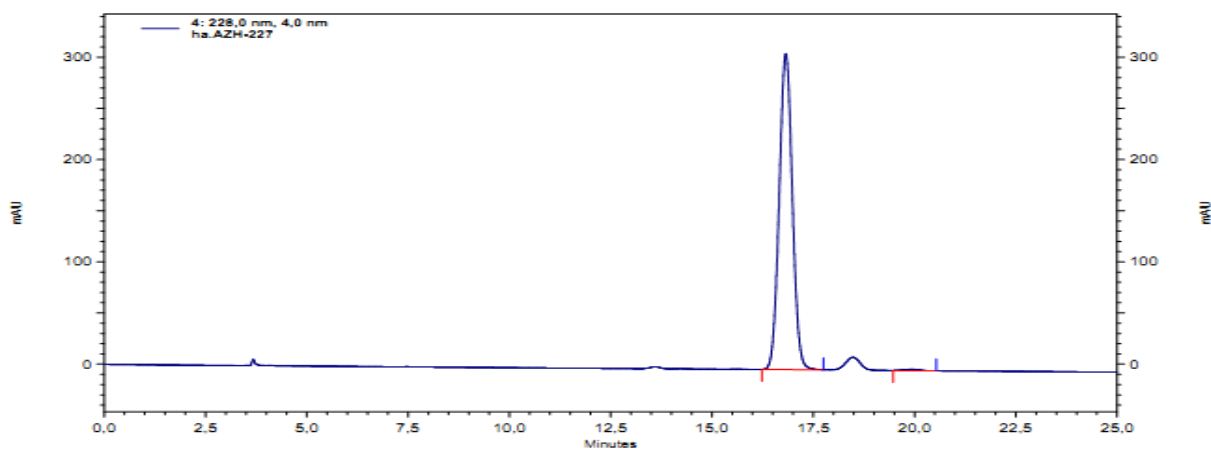

4: 228,0 nm, 4,0 nm

Results

| Peak Number | Retention Time | Area Percent | Area      |
|-------------|----------------|--------------|-----------|
| 1           | 16,820         | 99,516       | 933989091 |
| 2           | 19,922         | 0,484        | 4539395   |

|        |  |         |           |
|--------|--|---------|-----------|
| Totals |  | 100,000 | 938528486 |
|--------|--|---------|-----------|

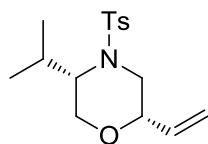

(2*S*,5*S*)-5-isopropyl-4-tosyl-2-vinylmorpholine (**2c**):  $^1\text{H}$  NMR (500 MHz, Chloroform-*d*)  $\delta$  7.72 (d,  $J$  = 8.3 Hz, 2H), 7.37 (d,  $J$  = 8.3 Hz, 2H), 5.67 (ddd,  $J$  = 17.4, 10.7, 5.5 Hz, 1H), 5.34 – 5.06 (m, 2H), 3.97 – 3.86 (m, 1H), 3.74 – 3.64 (m, 1H), 3.59–3.57 (m, 1H), 3.40 – 3.23 (m, 2H), 2.93 (dd,  $J$  = 14.6, 11.2 Hz, 1H), 2.43 (s, 3H), 2.26–2.22 (m, 1H), 0.97 (d,  $J$  = 6.6 Hz, 3H), 0.92 (d,  $J$  = 6.8 Hz, 3H) ppm;  $^{13}\text{C}$  NMR (126 MHz,  $\text{CDCl}_3$ )  $\delta$  143.4, 138.7, 134.9, 129.9, 127.0, 117.6, 74.9, 66.1, 59.0, 45.4, 25.4, 21.6, 20.0, 19.8 ppm; HRMS (ESI) calcd for  $\text{C}_{16}\text{H}_{23}\text{NO}_3\text{S}$   $[\text{M}+\text{H}]^+$ : 310.1477; found: 310.1470; **HPLC** (LC-3 column, heptane/ethanol = 95:5, 0.5 mL/min)  $t_R$  = 7.49 min (major),  $t_R$  = 9.23 min (minor), >99% ee;  $[\alpha]_D^{25}$  = +5.07 ( $c$  = 0.375,  $\text{CH}_2\text{Cl}_2$ ).

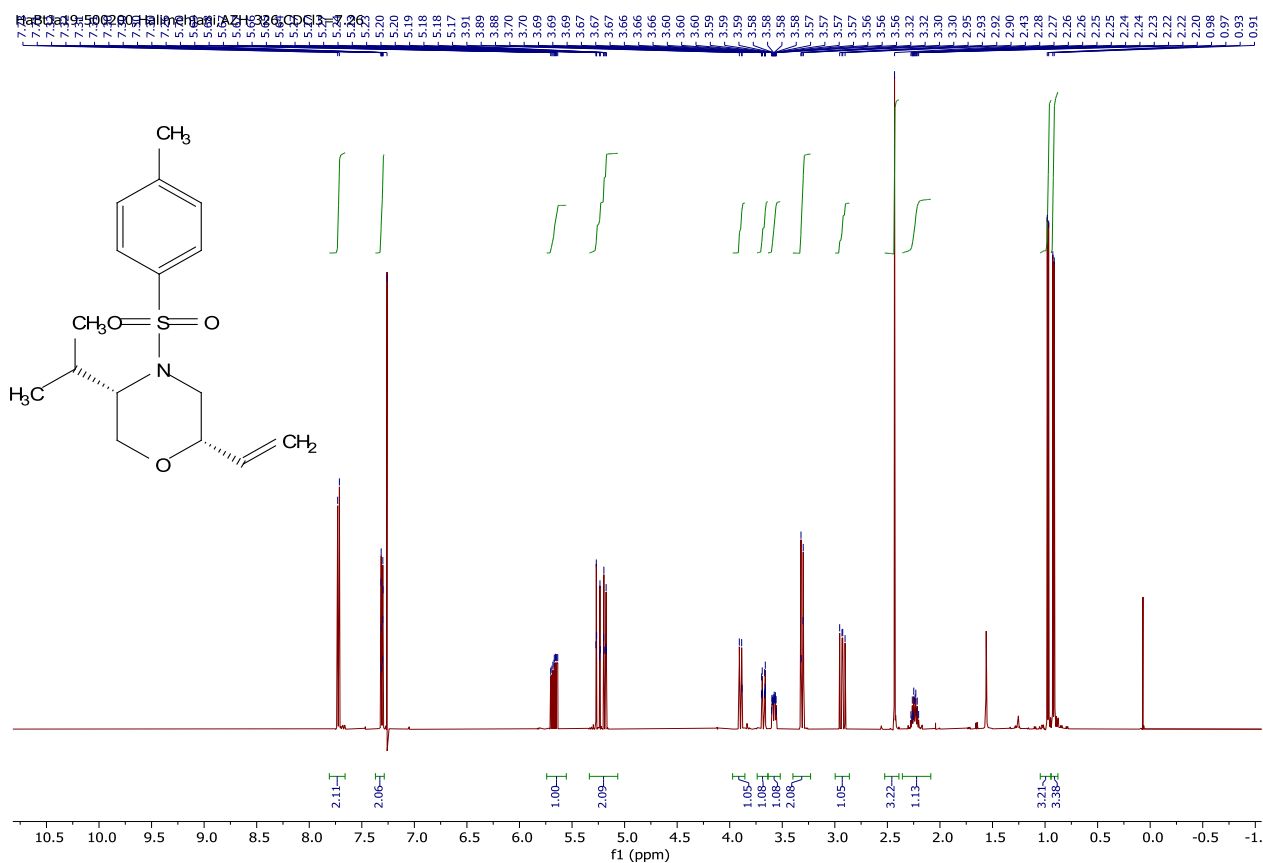

HaBtJa19-500205, Halimehjani, AZH-326, CDCl<sub>3</sub>=77.1000

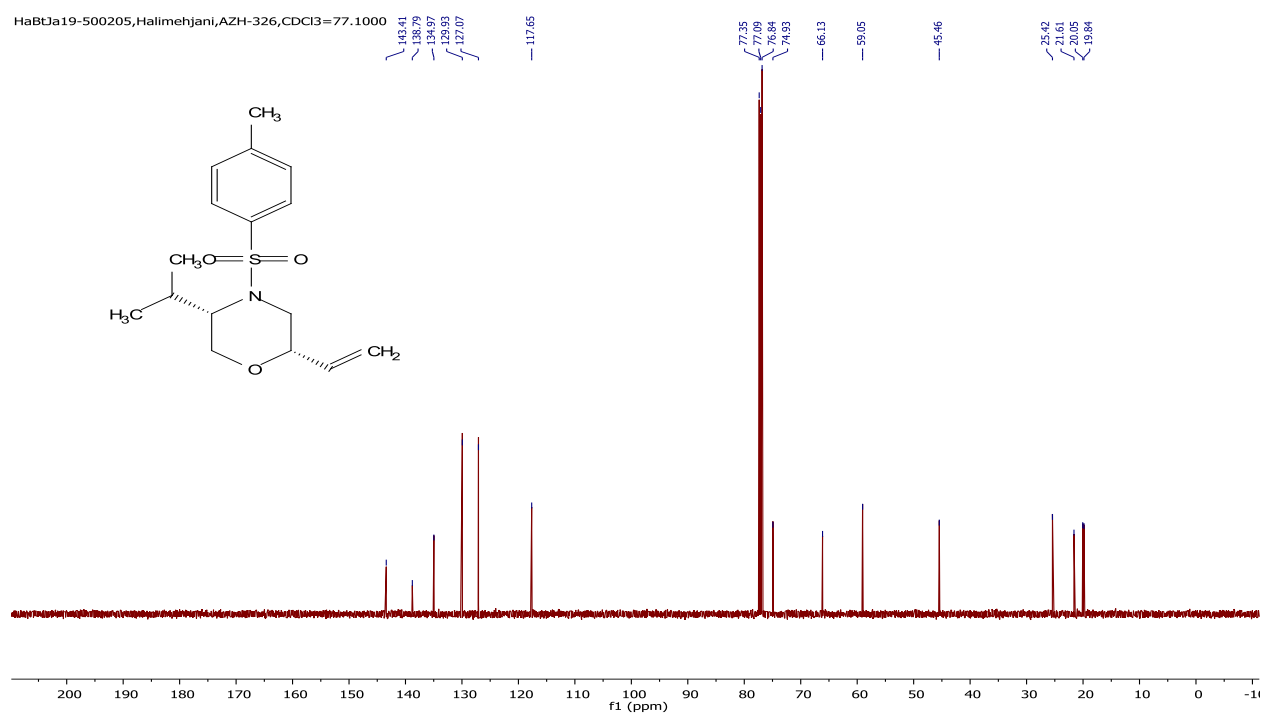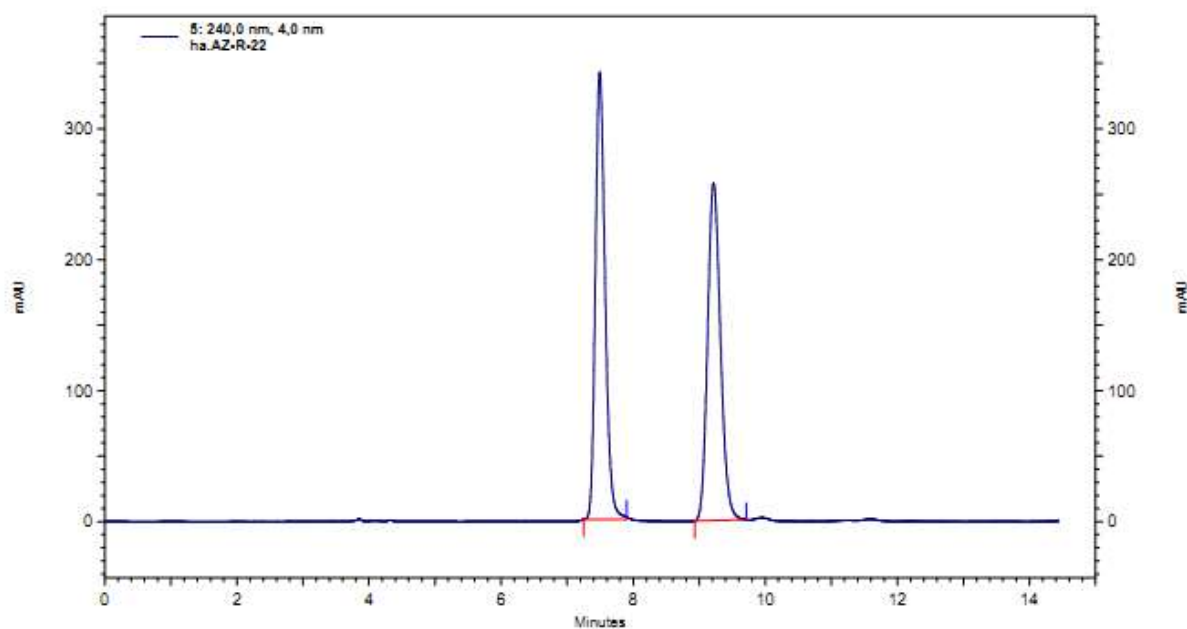

5: 240,0 nm, 4,0 nm

Results

| Peak Number | Retention Time | Area Percent | Area      |
|-------------|----------------|--------------|-----------|
| 1           | 7,493          | 49,936       | 467591943 |
| 2           | 9,217          | 50,064       | 468789513 |

|        |  |         |           |
|--------|--|---------|-----------|
| Totals |  | 100,000 | 936381456 |
|--------|--|---------|-----------|

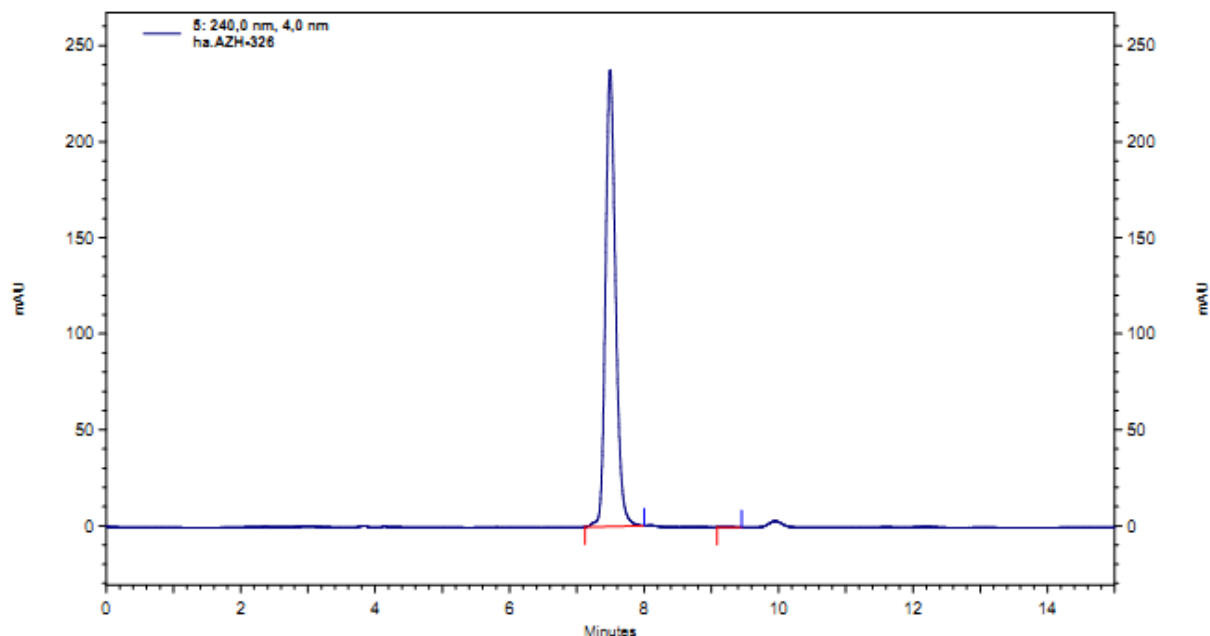

5: 240,0 nm, 4,0 nm

Results

| Peak Number | Retention Time | Area Percent | Area      |
|-------------|----------------|--------------|-----------|
| 1           | 7,495          | 99,924       | 332234073 |
| 2           | 9,227          | 0,076        | 254224    |
| Totals      |                | 100,000      | 332488297 |

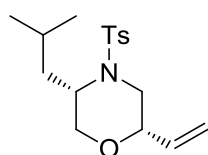

(2*S*,5*S*)-5-isobutyl-4-tosyl-2-vinylmorpholine (2*d*): <sup>1</sup>H NMR (500 MHz, Chloroform-*d*)  $\delta$  7.71 (d, *J* = 8.3 Hz, 2H), 7.36 – 7.29 (d, *J* = 8.3 Hz, 2H), 5.72 (ddd, *J* = 17.4, 10.8, 5.6 Hz, 1H), 5.30 (dt, *J* = 17.4, 1.4 Hz, 1H), 5.21 (dt, *J* = 10.8, 1.3 Hz, 1H), 3.85 – 3.67 (m, 3H), 3.66 – 3.58 (m, 1H), 3.54 (ddd, *J* = 11.6, 3.1, 0.8 Hz, 1H), 2.90 (dd, *J* = 13.7, 11.0 Hz, 1H), 2.43 (s, 3H), 1.60 – 1.49 (m, 2H), 1.42 – 1.31 (m, 1H), 0.88 (d, *J* = 6.3 Hz, 6H) ppm; <sup>13</sup>C NMR (126 MHz, CDCl<sub>3</sub>)  $\delta$  143.4, 138.1, 134.9, 129.8, 127.2, 117.7, 75.6, 68.7, 51.0, 44.8, 36.9, 24.9, 22.7, 22.5, 21.6 ppm; HRMS (ESI) calcd for C<sub>17</sub>H<sub>25</sub>NO<sub>3</sub> [M+H]<sup>+</sup>: 324.1633; found: 324.1630; **HPLC** (ChiralPAK AD-3, heptane/EtOH= 85:15, 0.5 mL/min) *t<sub>R</sub>* = 16.57 min (minor), *t<sub>R</sub>* = 33.44 min (major), >99% ee; [ $\alpha$ ]<sub>D</sub><sup>25</sup> = +25.38 (c = 0.26, CH<sub>2</sub>Cl<sub>2</sub>).

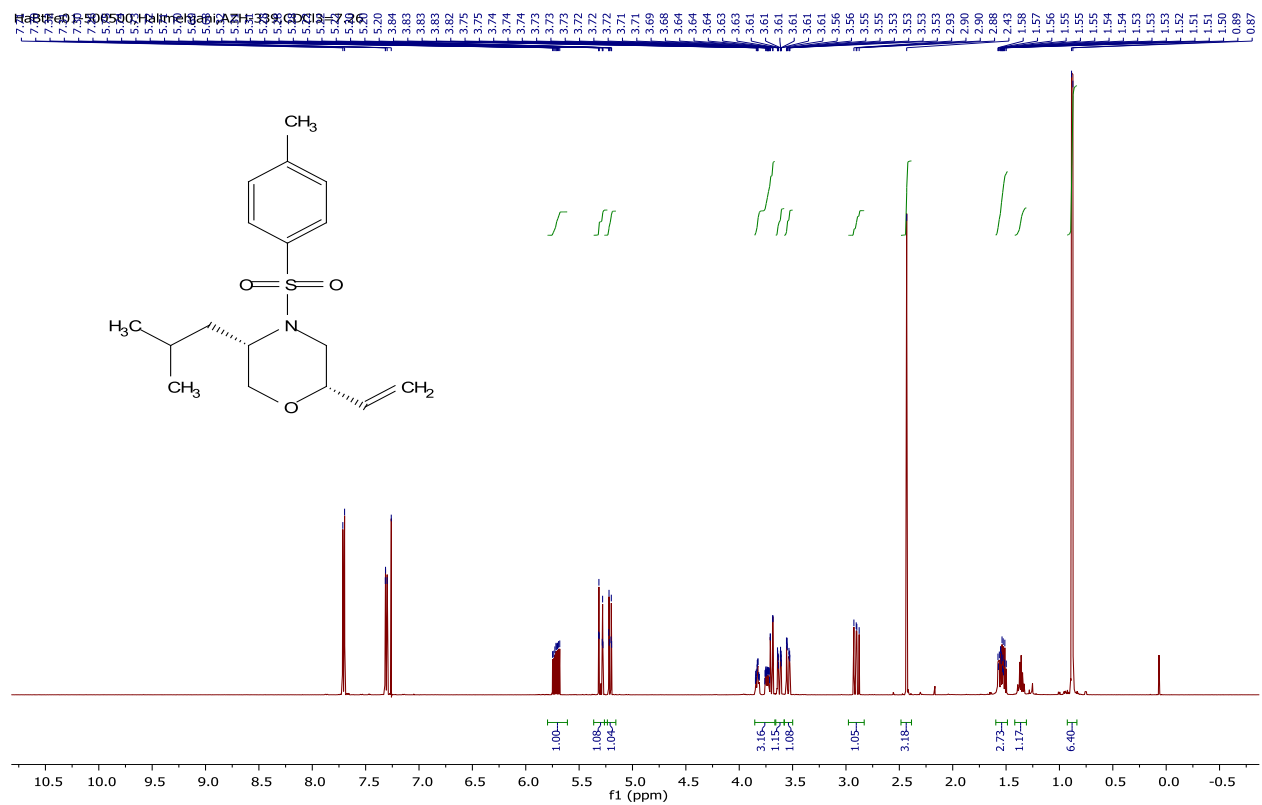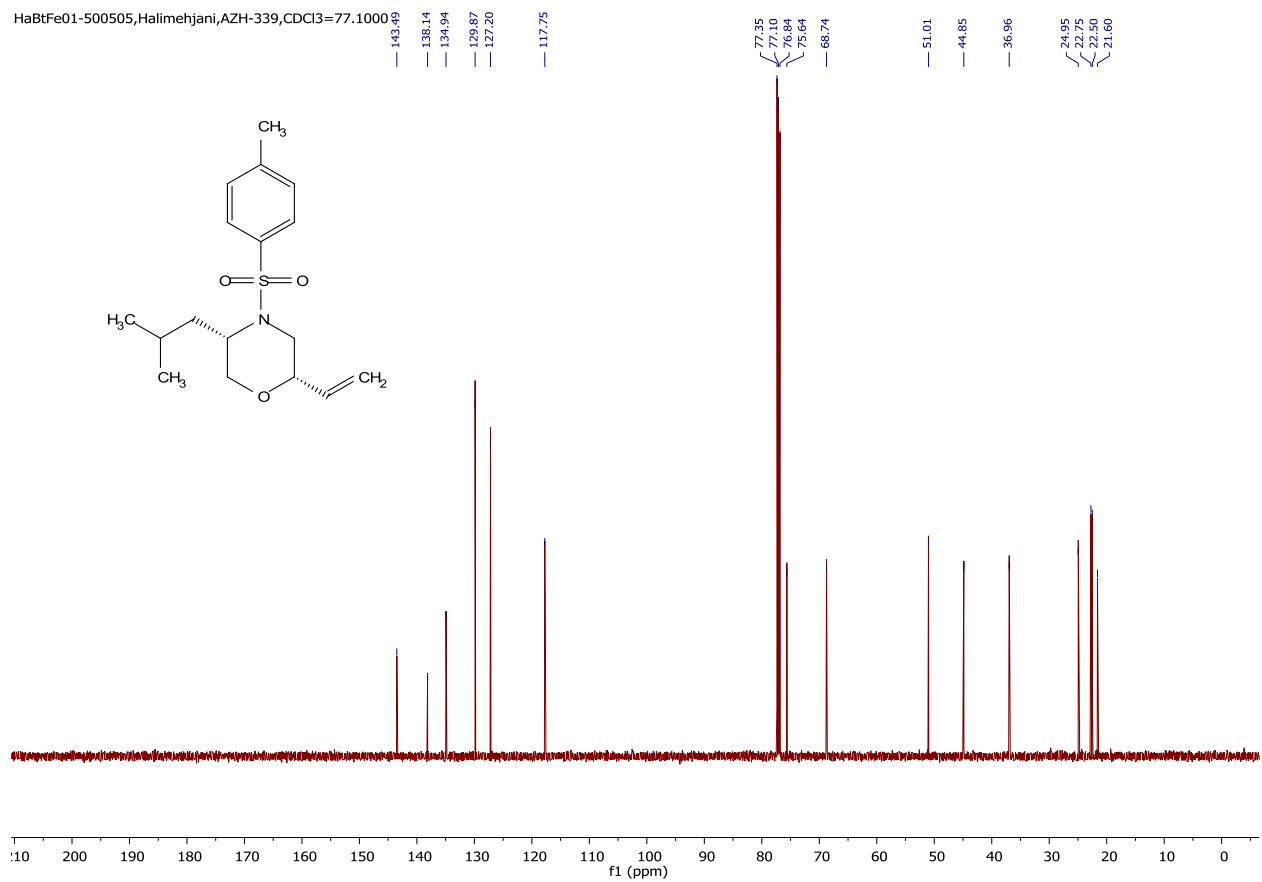



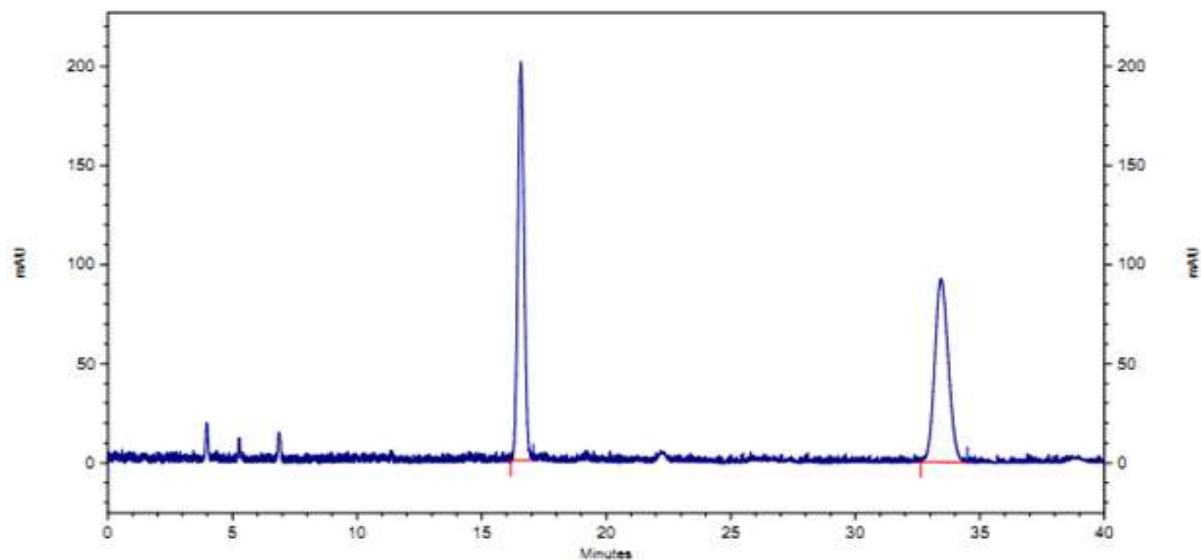

Spectrum Max Plot

Results

| Peak Number | Retention Time | Area Percent | Area      |
|-------------|----------------|--------------|-----------|
| 1           | 16,577         | 49,909       | 470284661 |
| 2           | 33,440         | 50,091       | 471993224 |

|        |  |         |           |
|--------|--|---------|-----------|
| Totals |  | 100,000 | 942277885 |
|--------|--|---------|-----------|

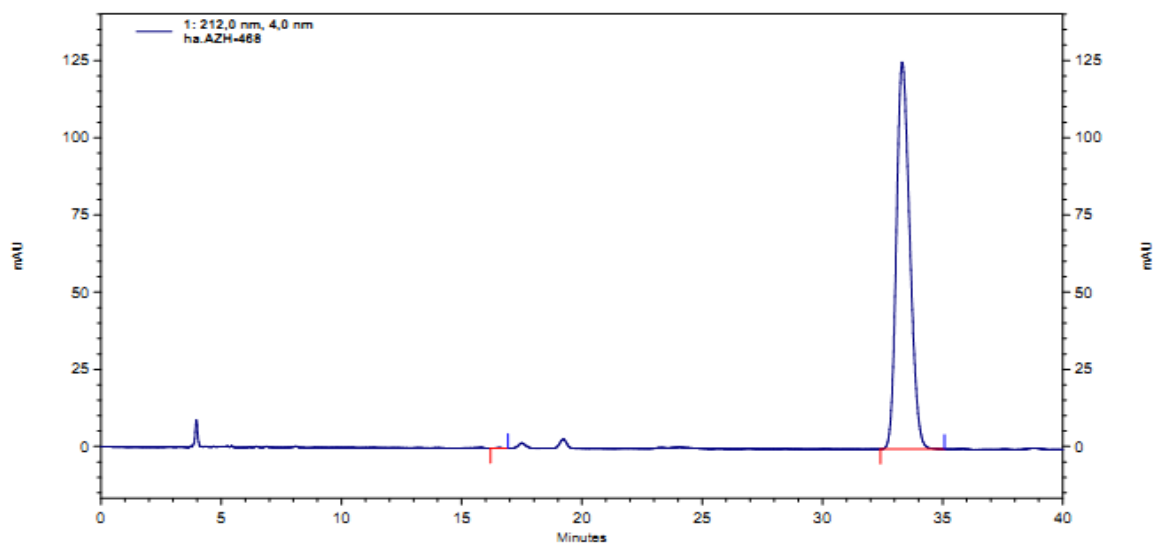

1: 212,0 nm, 4,0 nm

Results

| Peak Number | Retention Time | Area Percent | Area      |
|-------------|----------------|--------------|-----------|
| 1           | 16,572         | 0,074        | 480906    |
| 2           | 33,318         | 99,926       | 651041653 |

|        |  |         |           |
|--------|--|---------|-----------|
| Totals |  | 100,000 | 651522559 |
|--------|--|---------|-----------|

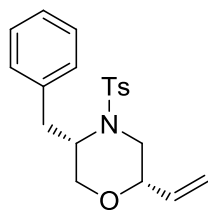

(2*S*,5*S*)-5-benzyl-4-tosyl-2-vinylmorpholine (**2e**):  $^1\text{H}$  NMR (500 MHz, Chloroform-*d*)  $\delta$  7.63 (d,  $J$  = 8.4 Hz, 2H), 7.29 – 7.16 (m, 7H), 5.81 (ddd,  $J$  = 17.4, 10.7, 5.6 Hz, 1H), 5.38 (dt,  $J$  = 17.4, 1.4 Hz, 1H), 5.27 (dt,  $J$  = 10.7, 1.3 Hz, 1H), 3.99–3.96 (m, 1H), 3.89–3.87 (m, 1H), 3.72 (dd,  $J$  = 11.7, 1.0 Hz, 1H), 3.69 – 3.61 (m, 1H), 3.47 (ddd,  $J$  = 11.7, 3.1, 1.2 Hz, 1H), 3.02 (ddd,  $J$  = 17.2, 13.2, 10.7 Hz, 2H), 2.73 – 2.65 (m, 1H), 2.41 (s, 3H) ppm;  $^{13}\text{C}$  NMR (126 MHz,  $\text{CDCl}_3$ )  $\delta$  143.5, 137.9, 137.6, 134.9, 129.9, 129.5, 128.7, 127.1, 126.6, 117.9, 76.1, 67.1, 54.1, 44.9, 34.0, 21.6 ppm; HRMS (ESI) calcd for  $\text{C}_{20}\text{H}_{23}\text{NO}_3\text{S}$  [ $\text{M}+\text{H}$ ] $^+$ : 358.1477; found: 358.1473; **HPLC** (ChiralPAK AD-3, heptane/ethanol = 85:15, 0.5 mL/min)  $t_R$  = 14.70 min (minor),  $t_R$  = 27.39 min (major), >99% ee;  $[\alpha]_D^{25}$  = -19.33 ( $c$  = 0.15,  $\text{CH}_2\text{Cl}_2$ ).

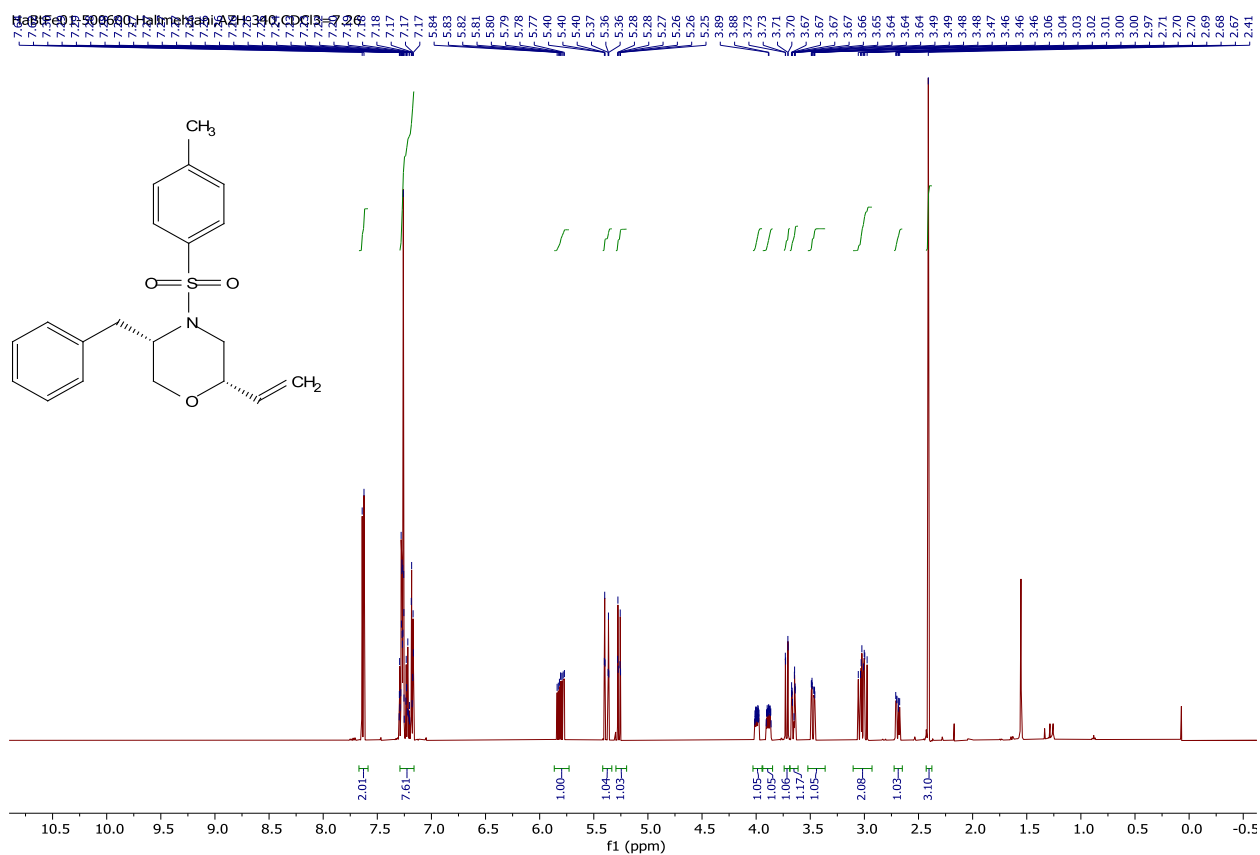

HaBtFe01-500605, Halimehjani, AZH-340, CDCl<sub>3</sub> = 77.10006

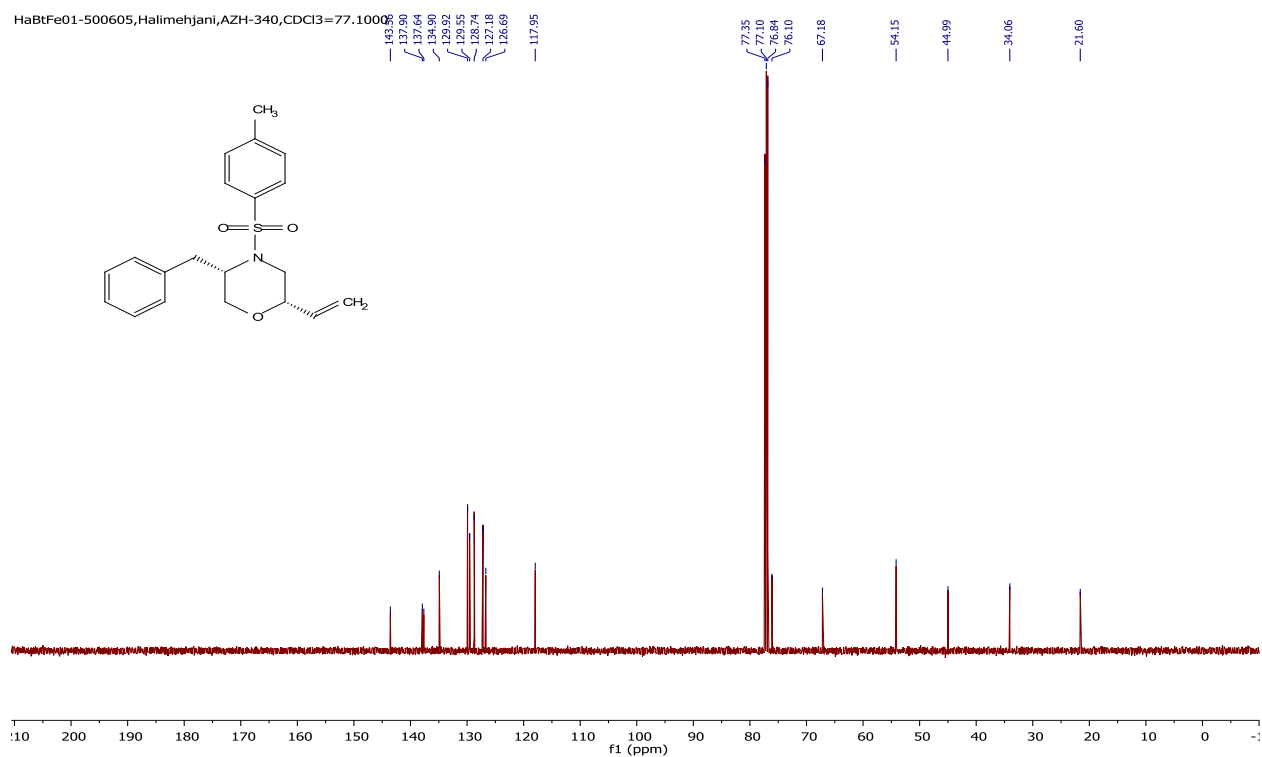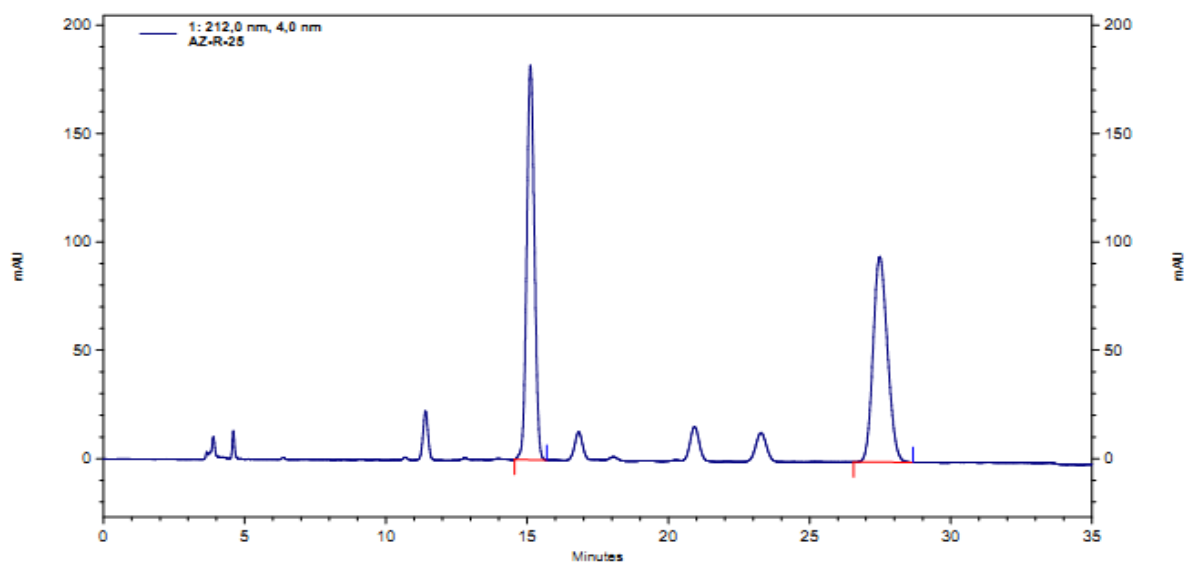

1: 212,0 nm, 4,0 nm

Results

| Peak Number | Retention Time | Area Percent | Area      |
|-------------|----------------|--------------|-----------|
| 1           | 15,117         | 50,774       | 465074531 |
| 2           | 27,482         | 49,226       | 450888215 |

|        |  |         |           |
|--------|--|---------|-----------|
| Totals |  | 100,000 | 915962746 |
|--------|--|---------|-----------|

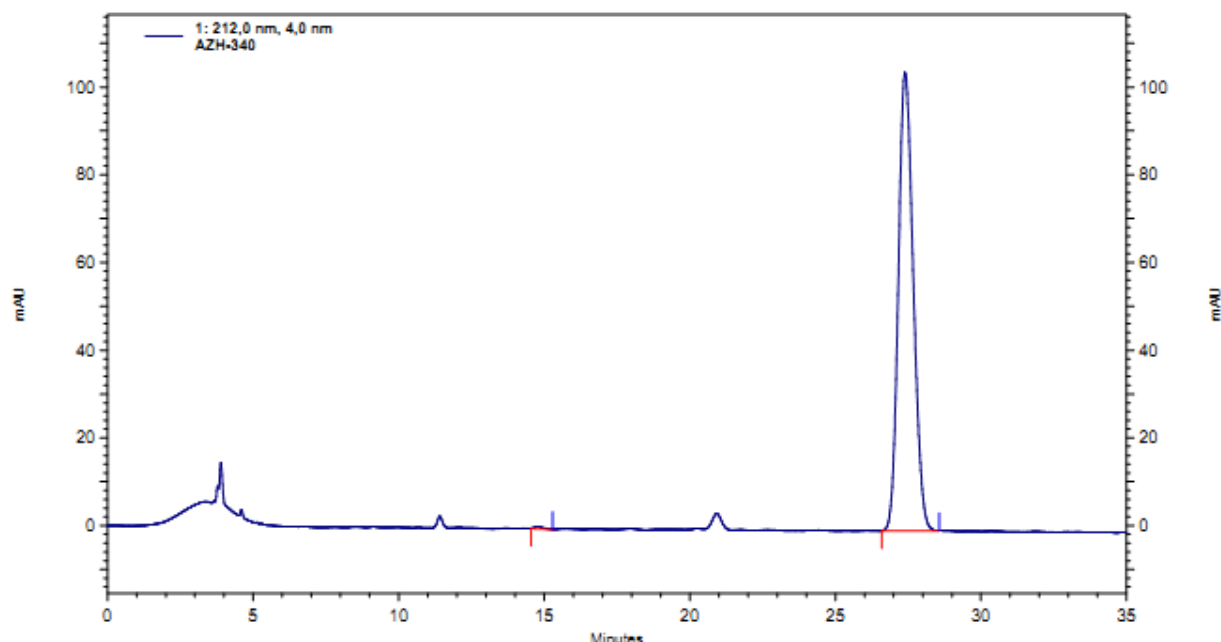

1: 212,0 nm, 4,0 nm

Results

| Peak Number | Retention Time | Area Percent | Area      |
|-------------|----------------|--------------|-----------|
| 1           | 14,755         | 0,273        | 1362164   |
| 2           | 27,390         | 99,727       | 497169124 |
| Totals      |                | 100,000      | 498531288 |

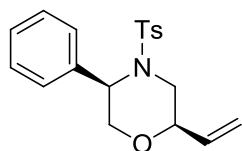

(2*R*,5*R*)-5-phenyl-4-tosyl-2-vinylmorpholine (**2f**): ppm;  $^1\text{H}$  NMR (500 MHz, Chloroform-*d*)  $\delta$  7.62 – 7.58 (m, 2H), 7.50 – 7.44 (m, 2H), 7.30 – 7.26 (m, 3H), 7.25 – 7.19 (m, 2H), 5.72 (ddd,  $J = 17.4, 10.7, 5.6$  Hz, 1H), 5.32 (dt,  $J = 17.4, 1.4$  Hz, 1H), 5.21 (dt,  $J = 10.8, 1.3$  Hz, 1H), 4.93 (d,  $J = 3.7$  Hz, 1H), 4.33 (dd,  $J = 12.1, 1.0$  Hz, 1H), 3.93 – 3.81 (m, 2H), 3.65 (ddd,  $J = 13.8, 3.1, 1.1$  Hz, 1H), 2.91 (dd,  $J = 13.8, 11.1$  Hz, 1H), 2.40 (s, 3H) ppm;  $^{13}\text{C}$  NMR (126 MHz,  $\text{CDCl}_3$ )  $\delta$  143.4, 137.8, 137.5, 134.8, 129.7, 128.4, 128.4, 127.7, 127.2, 117.8, 75.7, 68.6, 54.5, 45.4, 21.5 ppm; HRMS (ESI) calcd for  $\text{C}_{19}\text{H}_{21}\text{NO}_3\text{S}$   $[\text{M}+\text{H}]^+$ : 344.1320; found: 344.1318; **HPLC** (ChiralPAK AD-3, heptane/ethanol = 85:15, 0.5 mL/min)  $t_R$  = 22.66 min (minor),  $t_R$  = 24.80 min (major), >99% ee;  $[\alpha]_D^{25} = -40.4$  ( $c = 0.25$ ,  $\text{CH}_2\text{Cl}_2$ ).

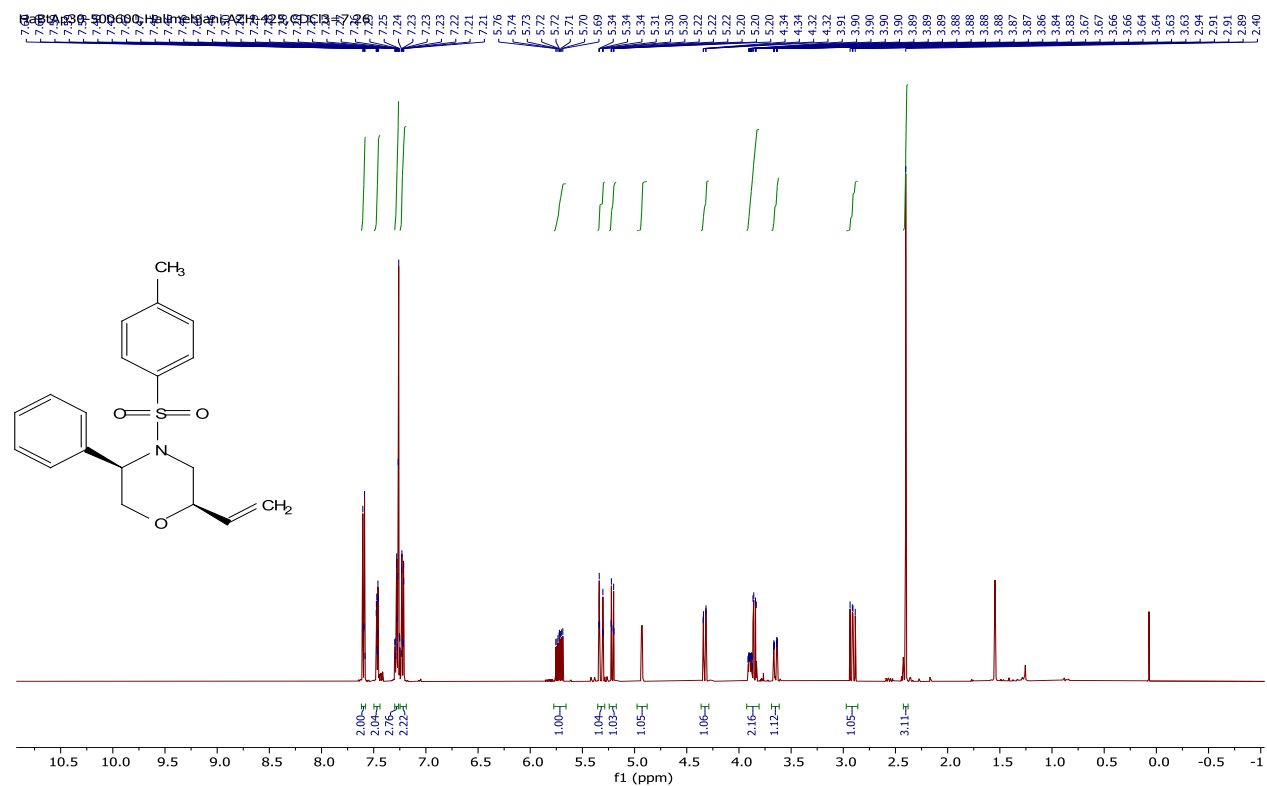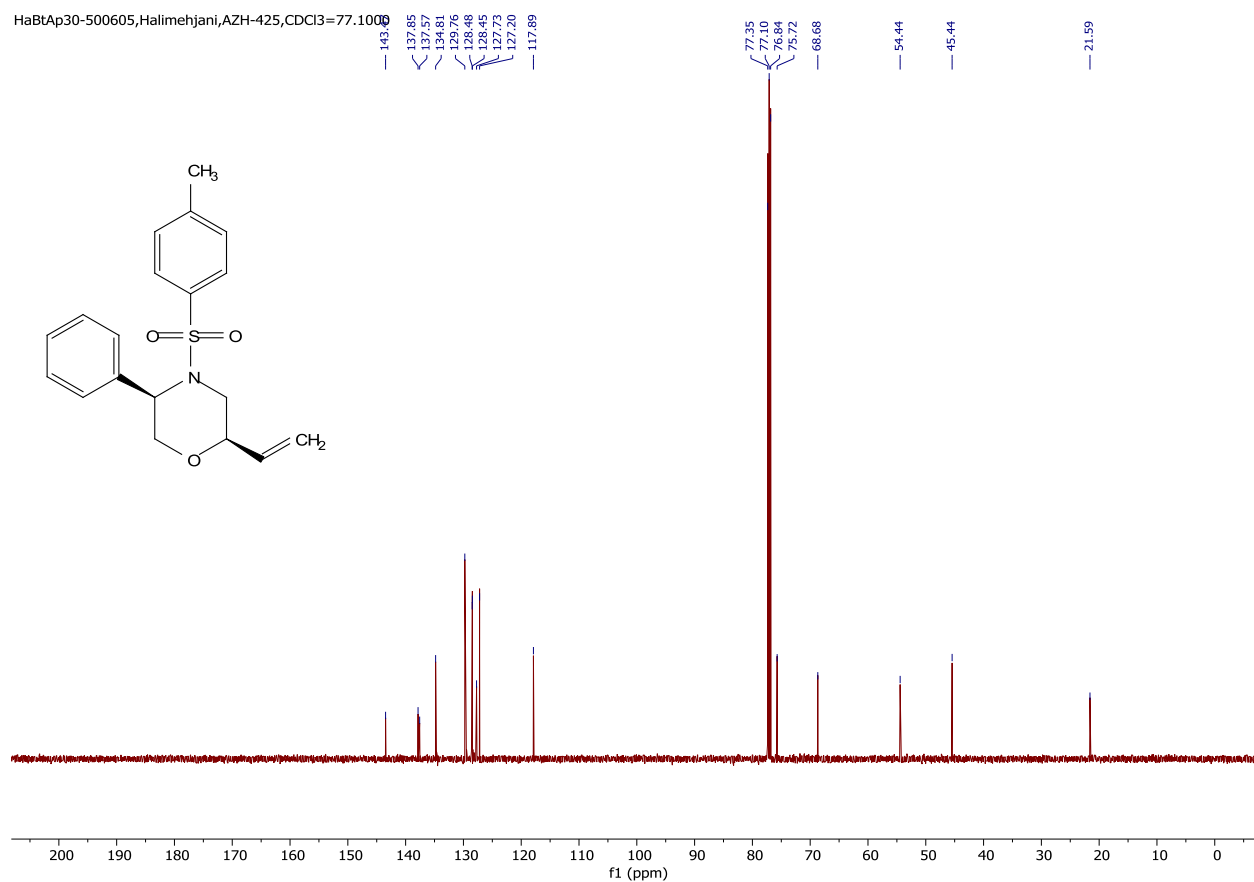

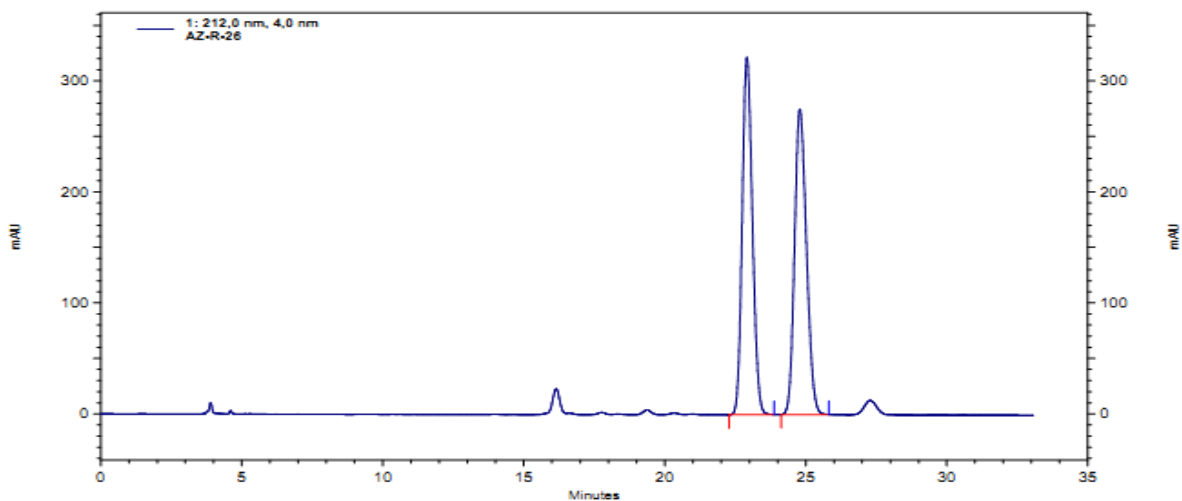

1: 212,0 nm, 4,0 nm

Results

| Peak Number | Retention Time | Area Percent | Area       |
|-------------|----------------|--------------|------------|
| 1           | 22,910         | 50,157       | 1089134629 |
| 2           | 24,790         | 49,843       | 1082307422 |

|        |  |         |            |
|--------|--|---------|------------|
| Totals |  | 100,000 | 2171442051 |
|--------|--|---------|------------|

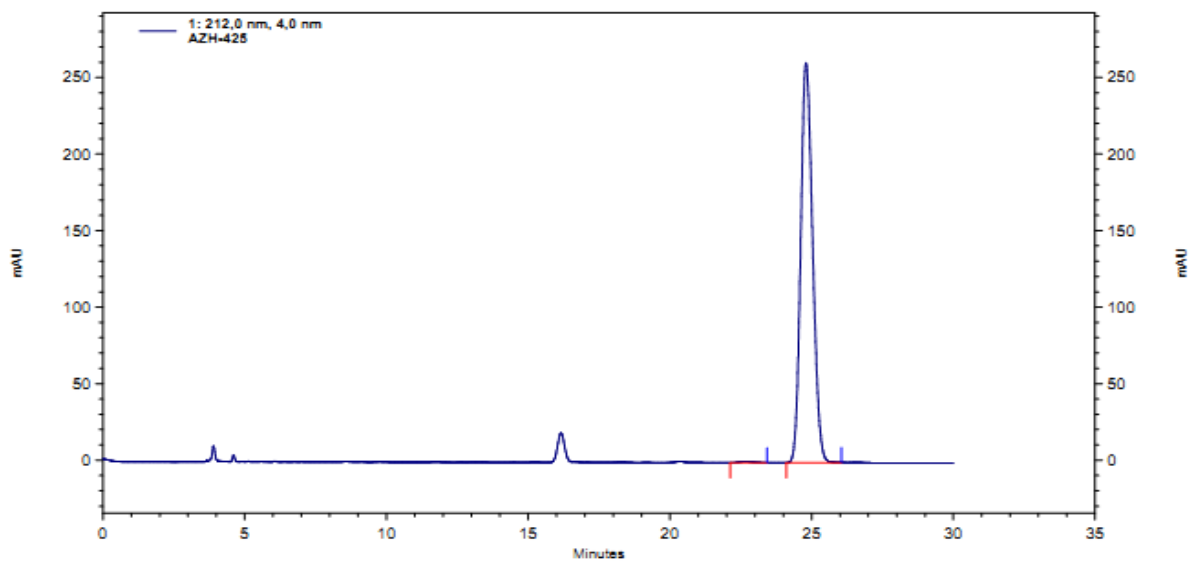

1: 212,0 nm, 4,0 nm

Results

| Peak Number | Retention Time | Area Percent | Area       |
|-------------|----------------|--------------|------------|
| 1           | 22,663         | 0,401        | 4130335    |
| 2           | 24,802         | 99,599       | 1025933014 |

|        |  |         |            |
|--------|--|---------|------------|
| Totals |  | 100,000 | 1030063349 |
|--------|--|---------|------------|

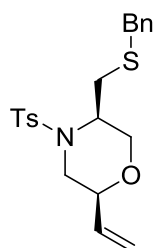

(2*S*,5*R*)-5-((benzylthio)methyl)-4-tosyl-2-vinylmorpholine (**2g**): ppm;  $^1\text{H}$  NMR (500 MHz, Chloroform-*d*)  $\delta$  7.62 (d,  $J$  = 8.3 Hz, 2H), 7.37 – 7.23 (m, 7H), 5.70 (ddd,  $J$  = 17.3, 10.8, 5.5 Hz, 1H), 5.34 – 5.16 (m, 2H), 4.17 (dd,  $J$  = 11.8, 0.9 Hz, 1H), 3.87 (ddd,  $J$  = 10.5, 4.5, 3.2 Hz, 1H), 3.78 (ddd,  $J$  = 5.4, 3.0, 1.5 Hz, 1H), 3.71 (s, 2H), 3.62 – 3.45 (m, 2H), 2.79 (ddd,  $J$  = 13.5, 10.8, 2.7 Hz, 2H), 2.42 (s, 4H) ppm;  $^{13}\text{C}$  NMR (126 MHz,  $\text{CDCl}_3$ )  $\delta$  143.6, 138.0, 137.6, 134.6, 129.9, 129.0, 128.6, 127.2, 127.1, 117.9, 75.7, 66.8, 51.7, 44.9, 36.2, 29.1, 21.6 ppm; HRMS (ESI) calcd for  $\text{C}_{21}\text{H}_{25}\text{NO}_3\text{S}_2$   $[\text{M}+\text{H}]^+$ : 404.1354; found: 404.1352; **HPLC** (ChiralPAK AD-3, heptane/ethanol = 85:15, 0.5 mL/min)  $t_R$  = 16.57 min (minor),  $t_R$  = 33.31 min (major), >99% ee;  $[\alpha]_{\text{D}}^{25}$  = +52.69 ( $c$  = 0.465,  $\text{CH}_2\text{Cl}_2$ ).

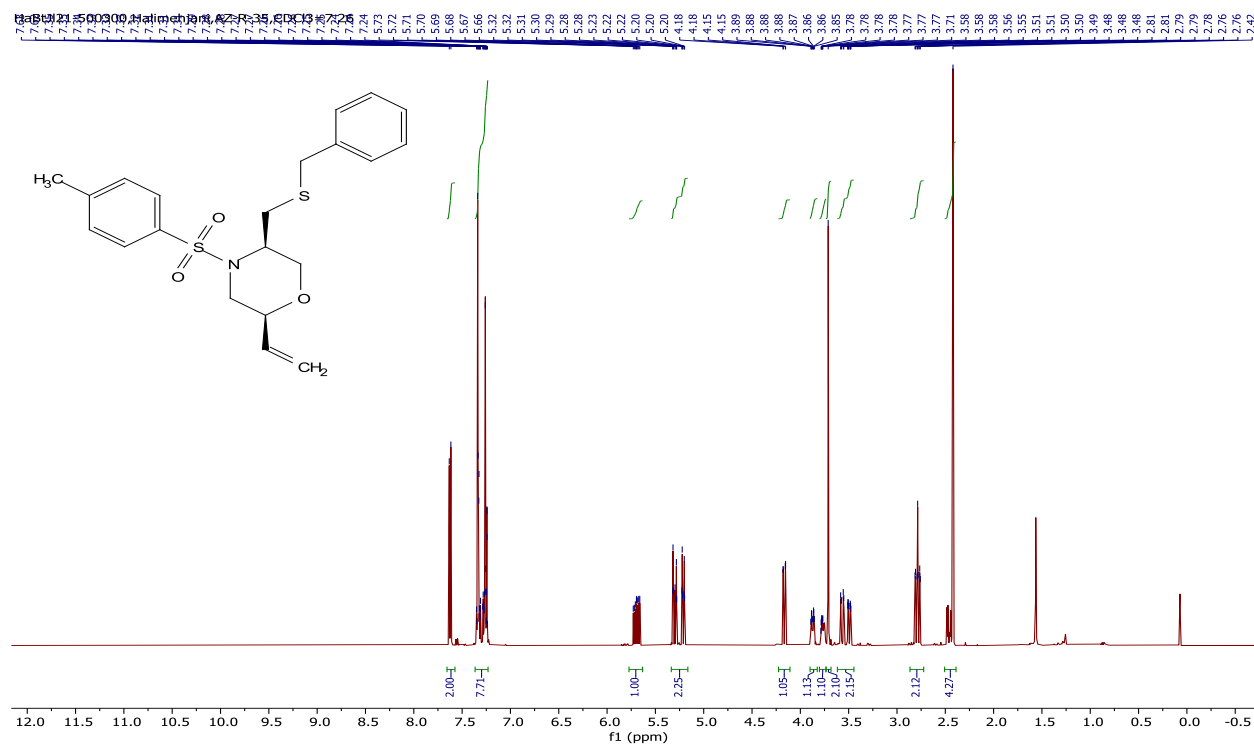

HaBtJl21-500305, Halimehjani, AZ-R-35, CDCl<sub>3</sub>=77.1000

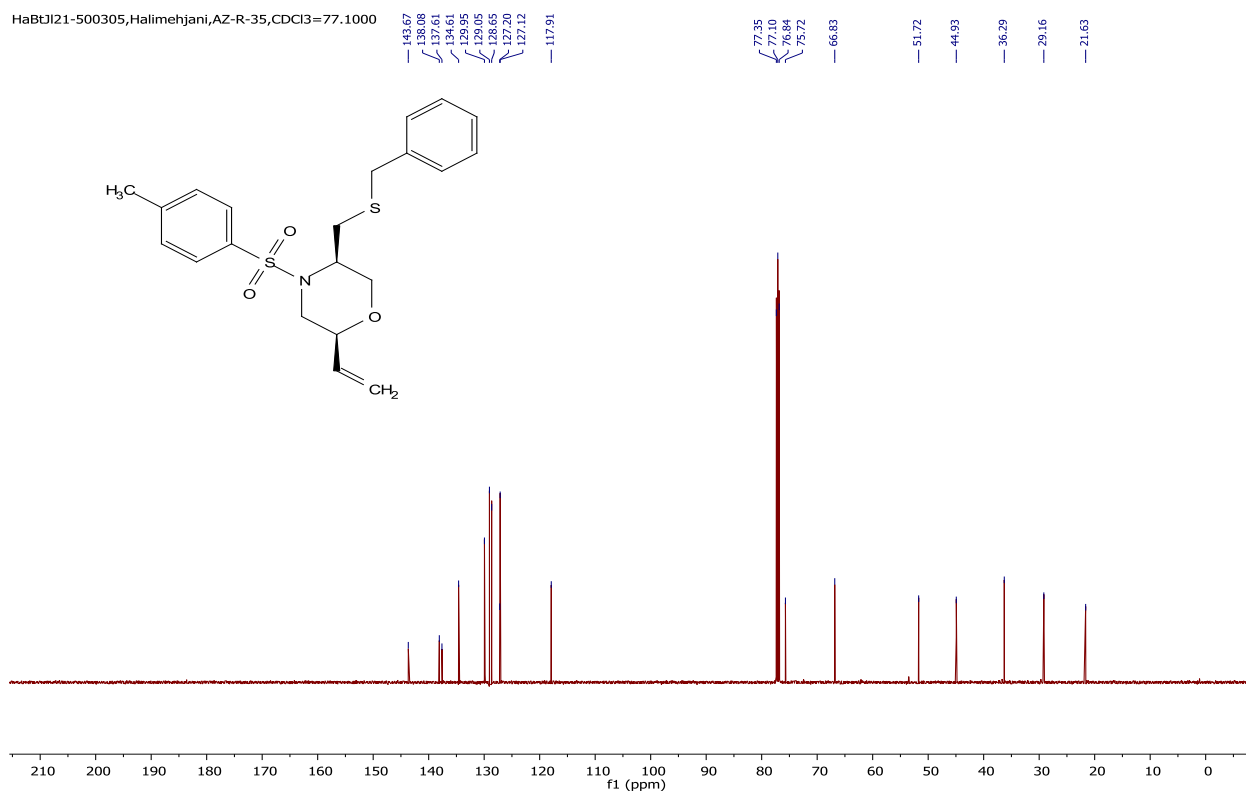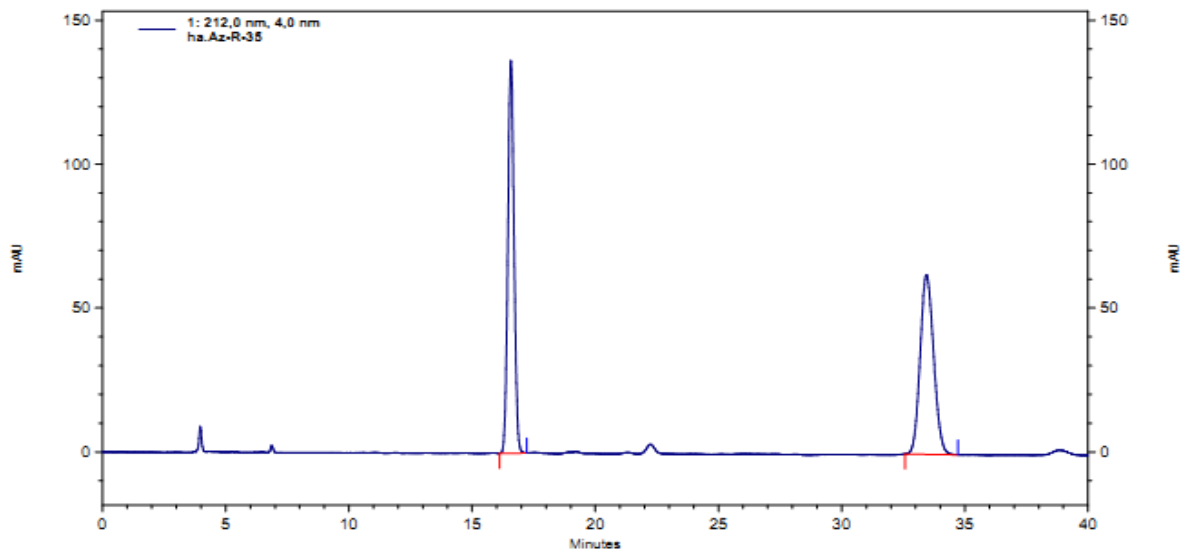

1: 212,0 nm, 4,0 nm

Results

| Peak Number | Retention Time | Area Percent | Area      |
|-------------|----------------|--------------|-----------|
| 1           | 16,575         | 50,115       | 320799101 |
| 2           | 33,442         | 49,885       | 319332750 |

|        |  |         |           |
|--------|--|---------|-----------|
| Totals |  | 100,000 | 640131851 |
|--------|--|---------|-----------|



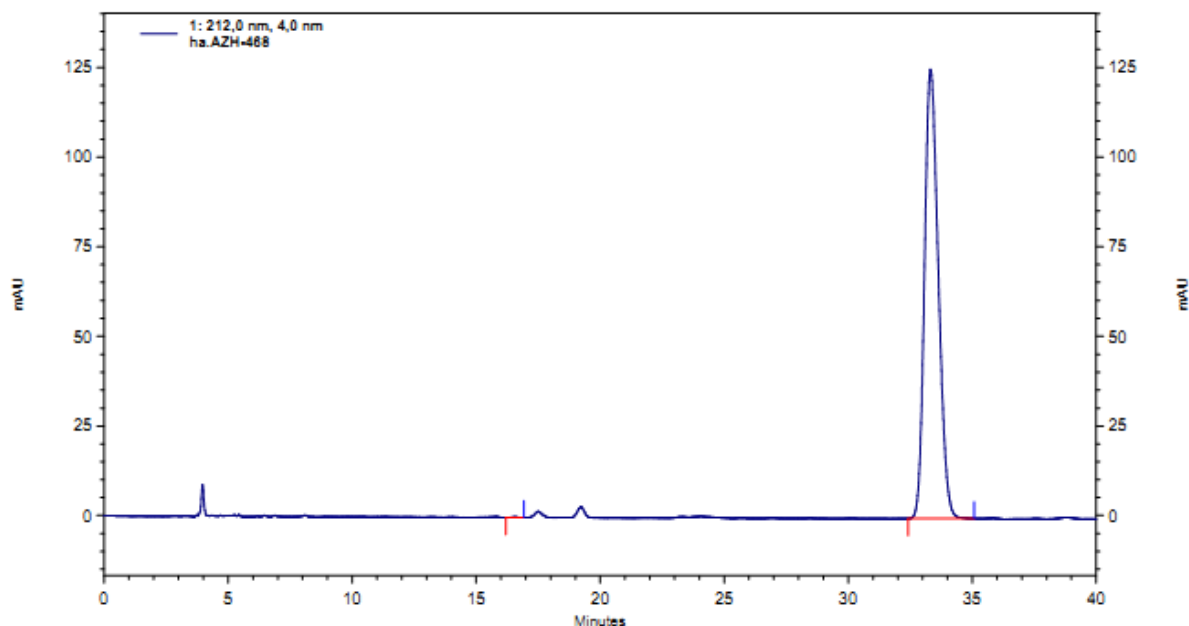

1: 212,0 nm, 4,0 nm

Results

| Peak Number | Retention Time | Area Percent | Area      |
|-------------|----------------|--------------|-----------|
| 1           | 16,572         | 0,074        | 480906    |
| 2           | 33,318         | 99,926       | 651041653 |
| Totals      |                | 100,000      | 651522559 |

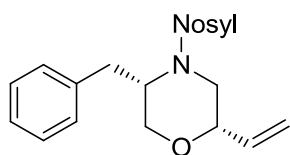

(2*S*,5*S*)-5-benzyl-4-((4-nitrophenyl)sulfonyl)-2-vinylmorpholine (**2h**):

ppm;  $^1\text{H}$  NMR (500 MHz, Chloroform-*d*)  $\delta$  8.21 (d,  $J$  = 9.0 Hz, 2H), 7.73 (d,  $J$  = 9.1 Hz, 2H), 7.25 – 7.18 (m, 3H), 7.14–7.12 (M, 2H), 5.82 (ddd,  $J$  = 17.4, 10.8, 5.5 Hz, 1H), 5.42 (dt,  $J$  = 17.4, 1.3 Hz, 1H), 5.31 (dt,  $J$  = 10.8, 1.3 Hz, 1H), 4.15 – 4.07 (m, 1H), 3.97–3.93 (m, 1H), 3.88 – 3.79 (m, 1H), 3.68 – 3.59 (m, 2H), 3.12 – 2.80 (m, 3H) ppm;  $^{13}\text{C}$  NMR (126 MHz, CDCl<sub>3</sub>)  $\delta$  149.8, 146.3, 137.4, 134.4, 129.3, 128.8, 128.1, 126.9, 124.4, 118.3, 76.4, 68.3, 54.6, 45.1, 34.7 ppm; HRMS (ESI) calcd for C<sub>19</sub>H<sub>20</sub>N<sub>2</sub>O<sub>5</sub>S [M]<sup>+</sup>: 388.1093; found: 388.1107; **HPLC** (ChiralPAK AD-3, heptane/isopropanol = 70:30, 0.5 mL/min)  $t_R$  = 9.79 min (minor),  $t_R$  = 14.18 min (major), >99% ee;  $[\alpha]_D^{25}$  = -16.5 ( $c$  = 0.20, CH<sub>2</sub>Cl<sub>2</sub>).

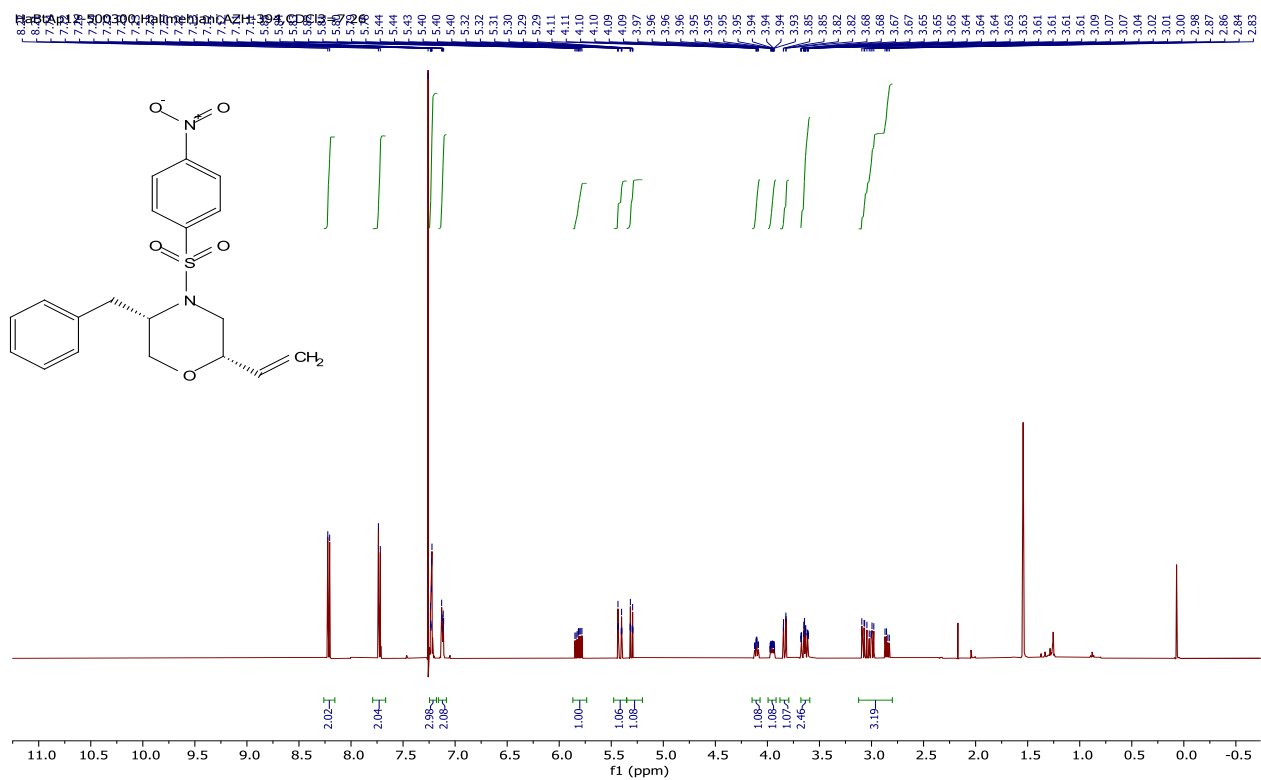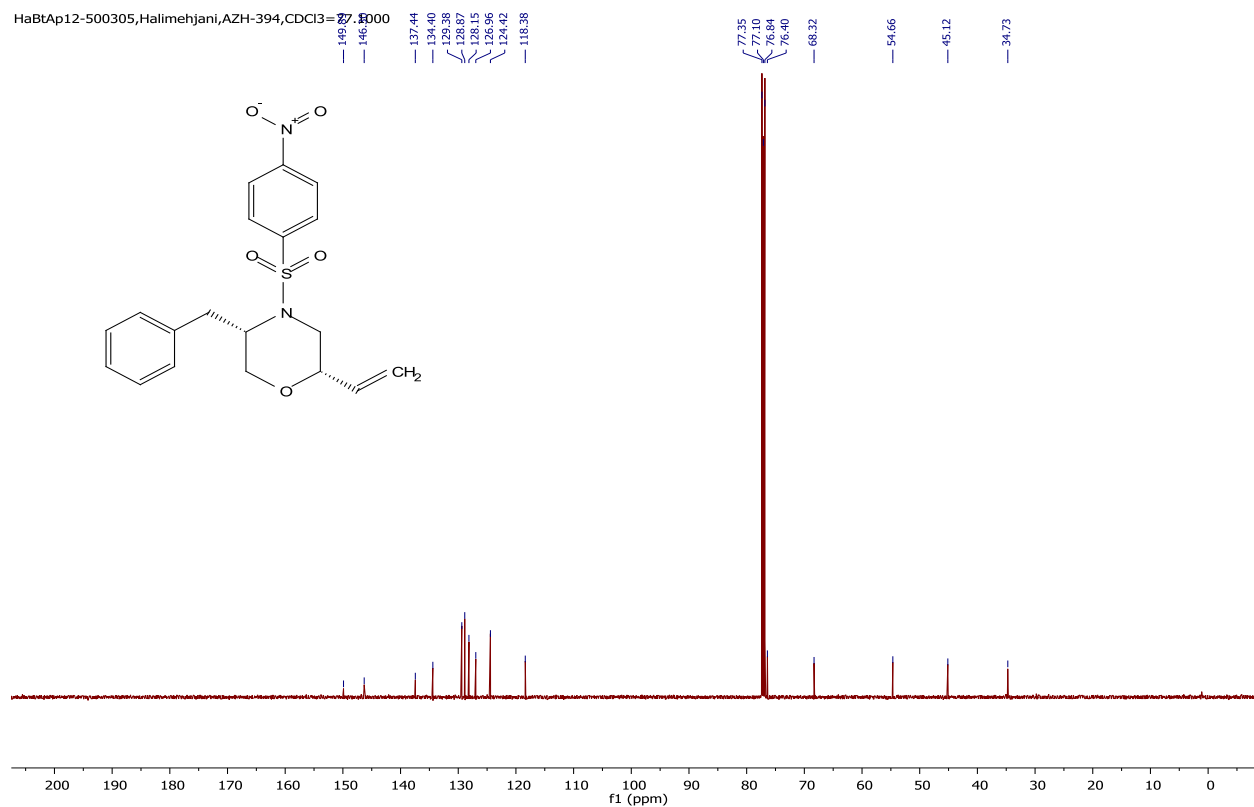

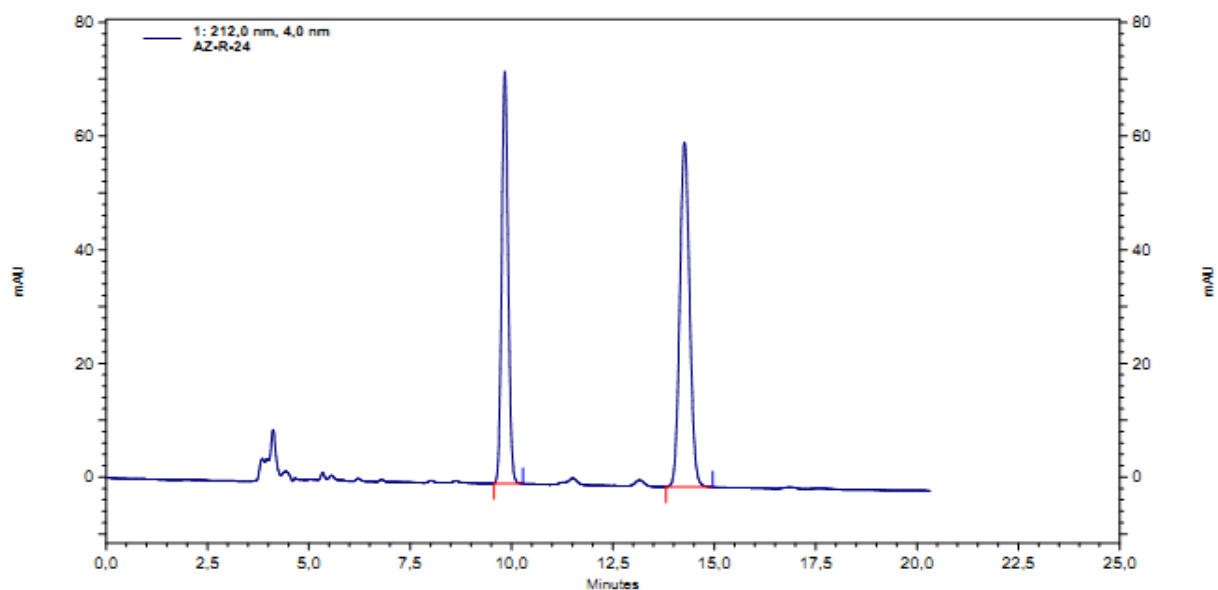

1: 212,0 nm, 4,0 nm

Results

| Peak Number | Retention Time | Area Percent | Area      |
|-------------|----------------|--------------|-----------|
| 1           | 9,833          | 43,841       | 107531095 |
| 2           | 14,267         | 56,159       | 137743815 |

|        |  |         |           |
|--------|--|---------|-----------|
| Totals |  | 100,000 | 245274910 |
|--------|--|---------|-----------|

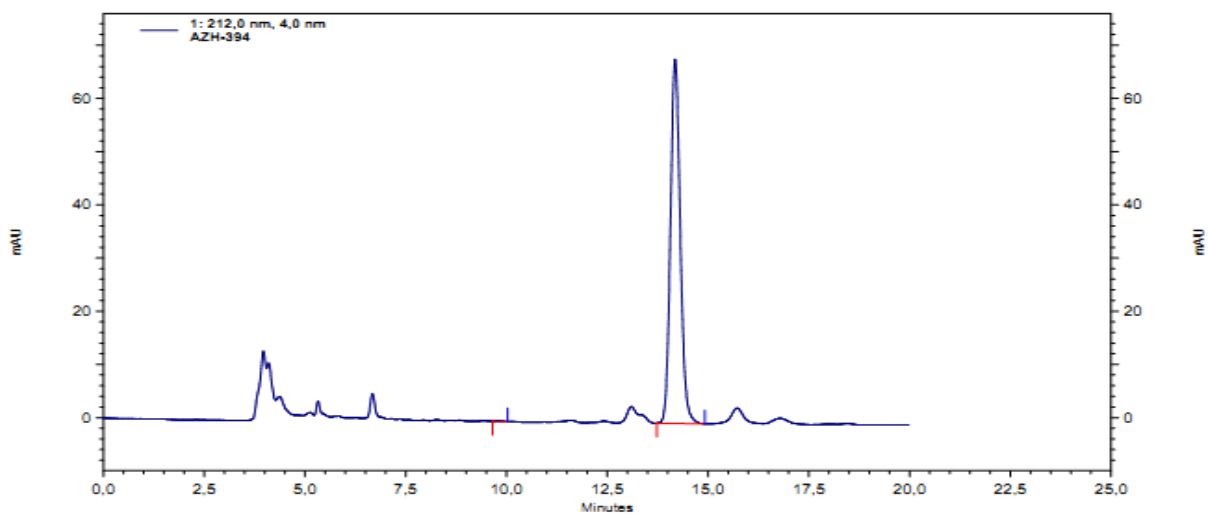

1: 212,0 nm, 4,0 nm

Results

| Peak Number | Retention Time | Area Percent | Area      |
|-------------|----------------|--------------|-----------|
| 1           | 9,793          | 0,072        | 112451    |
| 2           | 14,180         | 99,928       | 155413205 |

|        |  |         |           |
|--------|--|---------|-----------|
| Totals |  | 100,000 | 155525656 |
|--------|--|---------|-----------|

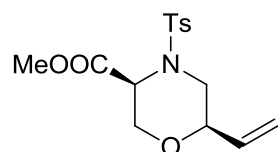

(3*S*,6*R*)-methyl 4-tosyl-6-vinylmorpholine-3-carboxylate (**2i**):  $^1\text{H}$  NMR (500 MHz, Chloroform-*d*)  $\delta$  7.66 (d,  $J$  = 8.3 Hz, 2H), 7.30 (dd,  $J$  = 8.5, 0.8 Hz, 2H), 5.71 (ddd,  $J$  = 17.4, 10.7, 5.7 Hz, 1H), 5.32 (dt,  $J$  = 17.4, 1.4 Hz, 1H), 5.22 (dt,  $J$  = 10.8, 1.3 Hz, 1H), 4.53 (dt,  $J$  = 3.7, 1.2 Hz, 1H), 4.37 (dd,  $J$  = 11.6, 1.2 Hz, 1H), 3.98–3.95 (m, 1H), 3.80 (dd,  $J$  = 11.7, 3.8 Hz, 1H), 3.70 – 3.61 (m, 1H), 3.56 (s, 3H), 3.13 (dd,  $J$  = 12.6, 11.0 Hz, 1H), 2.43 (s, 3H) ppm;  $^{13}\text{C}$  NMR (126 MHz,  $\text{CDCl}_3$ )  $\delta$  169.3, 143.6, 136.4, 134.3, 129.6, 127.3, 118.3, 76.6, 68.6, 54.5, 52.3, 45.9, 21.6 ppm; HRMS (ESI) calcd for  $\text{C}_{15}\text{H}_{19}\text{NO}_5\text{S}$   $[\text{M}+\text{Na}]^+$ : 348.0882; found: 348.0880; **HPLC** (ChiralPAK AD-3, heptane/ethanol = 85:15, 0.5 mL/min)  $t_R$  = 18.34 min (major),  $t_R$  = 23.91 min (minor), 98.5% ee;  $[\alpha]_D^{25}$  = -78.67 ( $c$  = 0.675,  $\text{CH}_2\text{Cl}_2$ ).

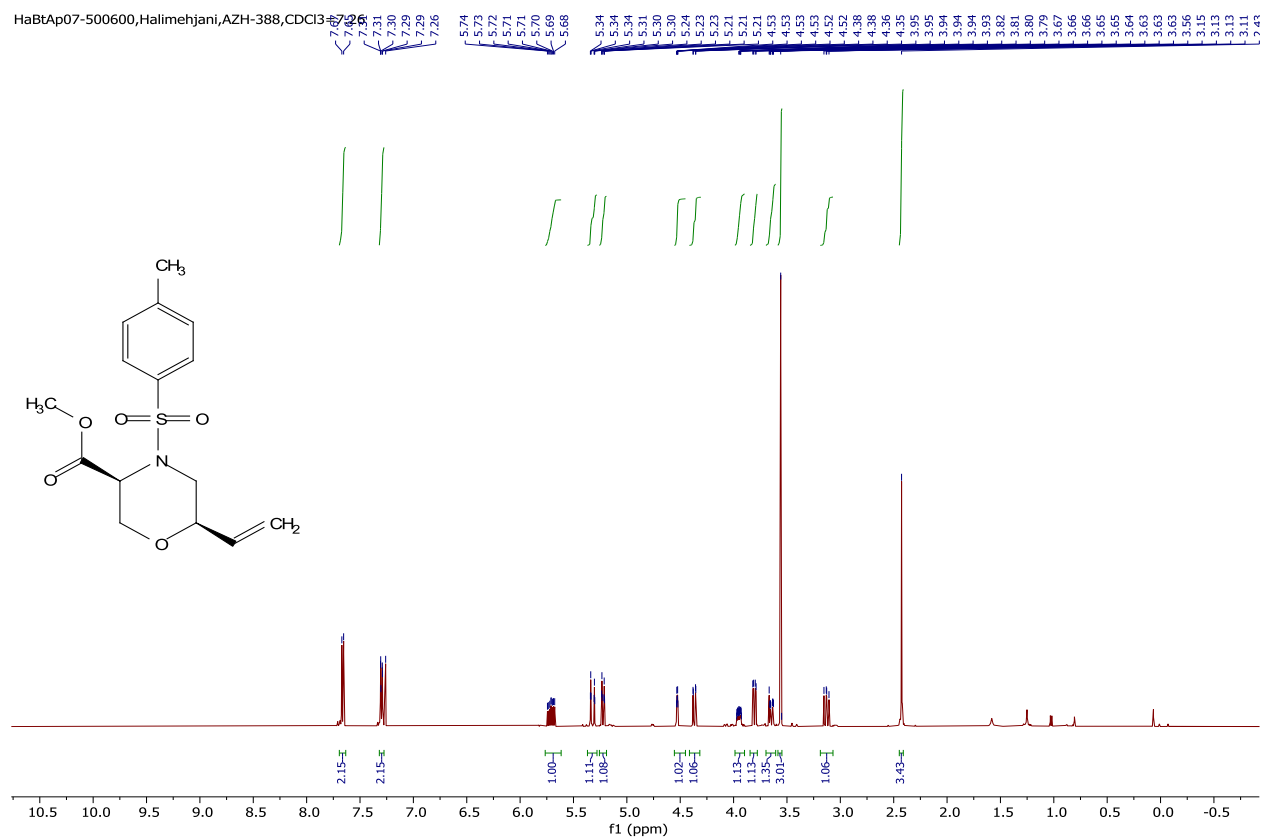

HaBtAp07-500605, HalimehJani, AZ-R-29, 1H-388, CDCl3=77.100D

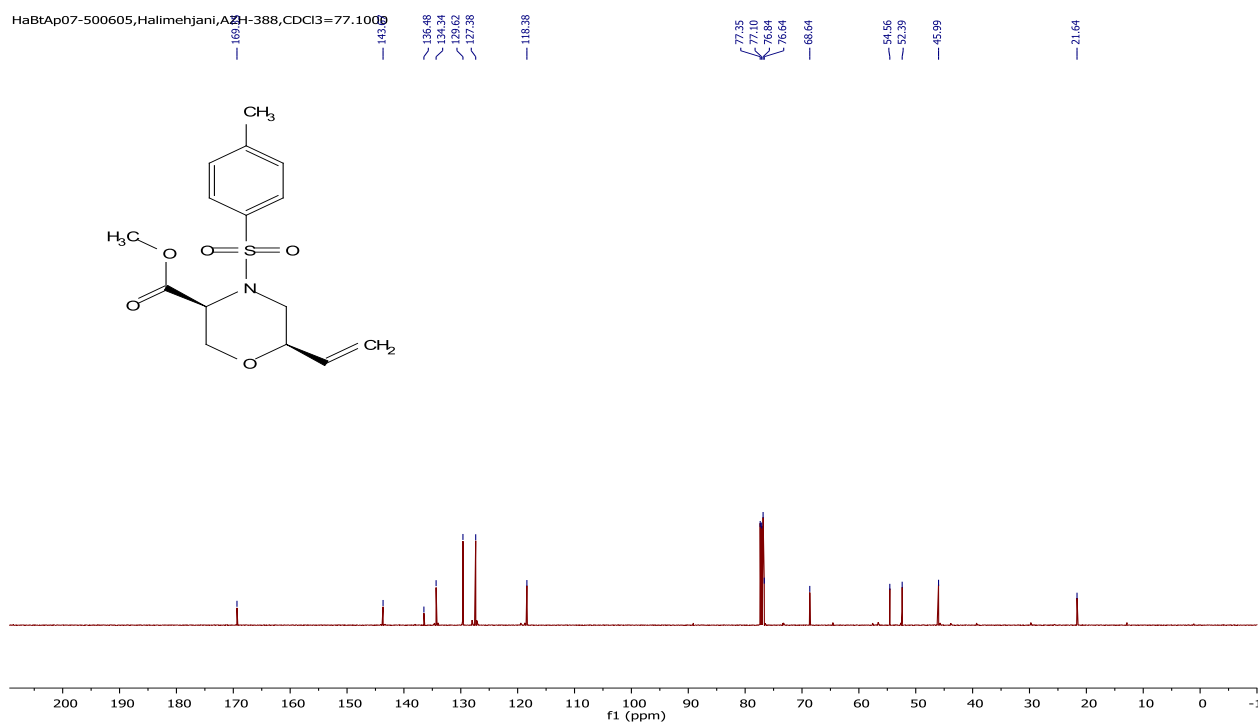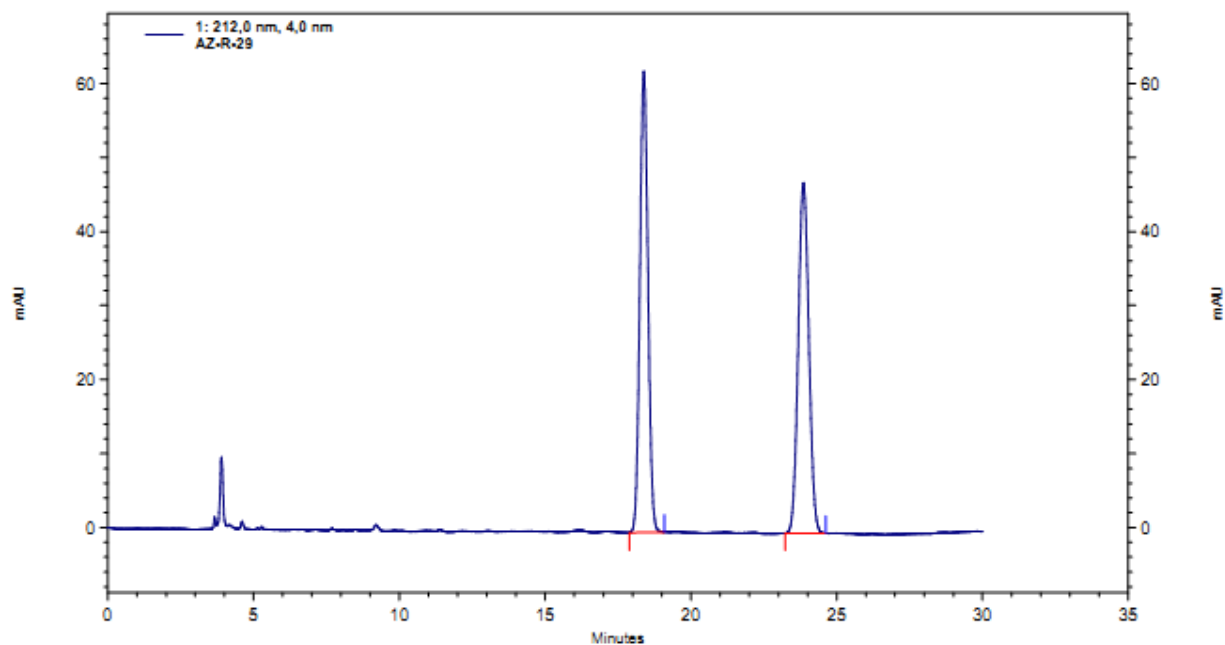

1: 212,0 nm, 4,0 nm

Results

| Peak Number | Retention Time | Area Percent | Area      |
|-------------|----------------|--------------|-----------|
| 1           | 18,383         | 50,187       | 162126278 |
| 2           | 23,860         | 49,813       | 160920440 |

|        |  |         |           |
|--------|--|---------|-----------|
| Totals |  | 100,000 | 323046718 |
|--------|--|---------|-----------|

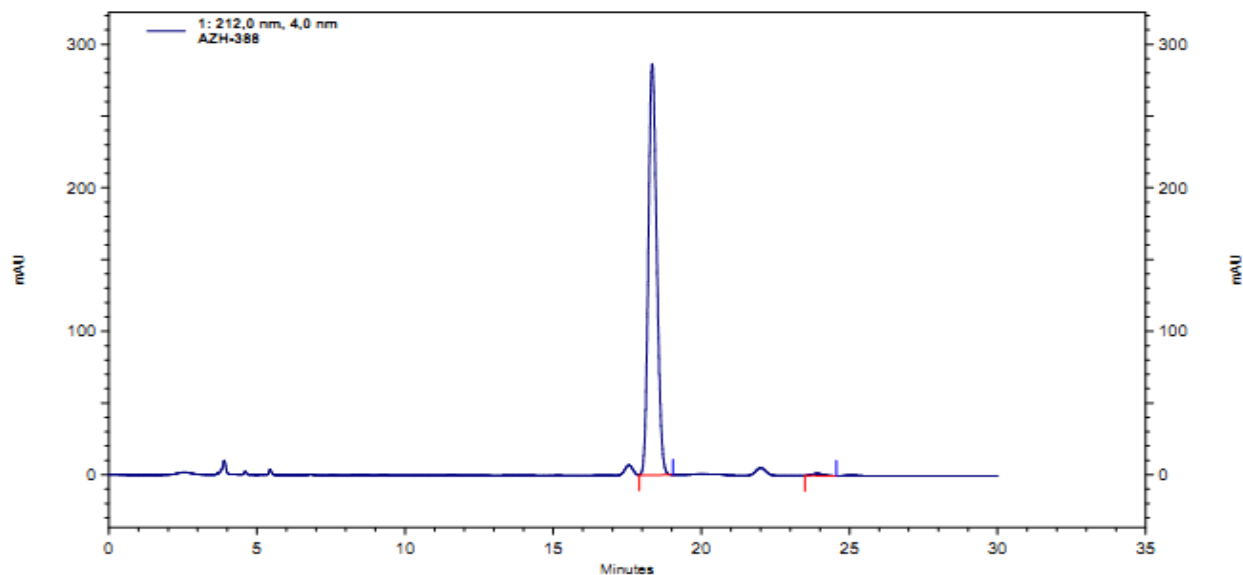

1: 212,0 nm, 4,0 nm

Results

| Peak Number | Retention Time | Area Percent | Area      |
|-------------|----------------|--------------|-----------|
| 1           | 18,340         | 99,258       | 755717849 |
| 2           | 23,913         | 0,742        | 5649032   |

|        |  |         |           |
|--------|--|---------|-----------|
| Totals |  | 100,000 | 761366881 |
|--------|--|---------|-----------|

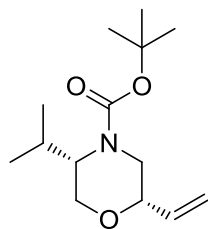

(2*S*,5*S*)-*tert*-butyl 5-isopropyl-2-vinylmorpholine-4-carboxylate (**2j**):  $^1\text{H}$  NMR (500 MHz, Chloroform-*d*)  $\delta$  5.79 (ddd,  $J = 17.4, 10.7, 5.4$  Hz, 1H), 5.41 – 5.13 (m, 2H), 4.09 – 3.73 (m, 3H), 3.65 – 3.35 (m, 2H), 2.72–2.68 (m, 1H), 2.27–2.23 (m, 1H), 1.46 (s, 9H), 0.98 (m, 3H), 0.86 (m, 3H) ppm;  $^{13}\text{C}$  NMR (126 MHz,  $\text{CDCl}_3$ )  $\delta$  154.9, 154.7, 135.6, 135.6, 117.3, 117.1, 79.9, 79.8, 76.6, 76.4, 67.3, 67.1, 57.4, 55.7, 44.8, 43.2, 28.4, 25.5, 25.4, 20.3, 20.1, 19.1, 18.6 ppm; HRMS (ESI) calcd for  $\text{C}_{14}\text{H}_{25}\text{NO}_3$   $[\text{M}+\text{H}]^+$ : 256.1913; found: 256.1908; HPLC (ChiralPAK AD-3, heptane/isopropanol = 99.5:0.5, 0.5 mL/min)  $t_R = 5.34$  min (minor),  $t_R = 5.66$  min (major), 95% ee;  $[\alpha]_D^{25} = +16.47$  ( $c = 0.212$ ,  $\text{CH}_2\text{Cl}_2$ ).

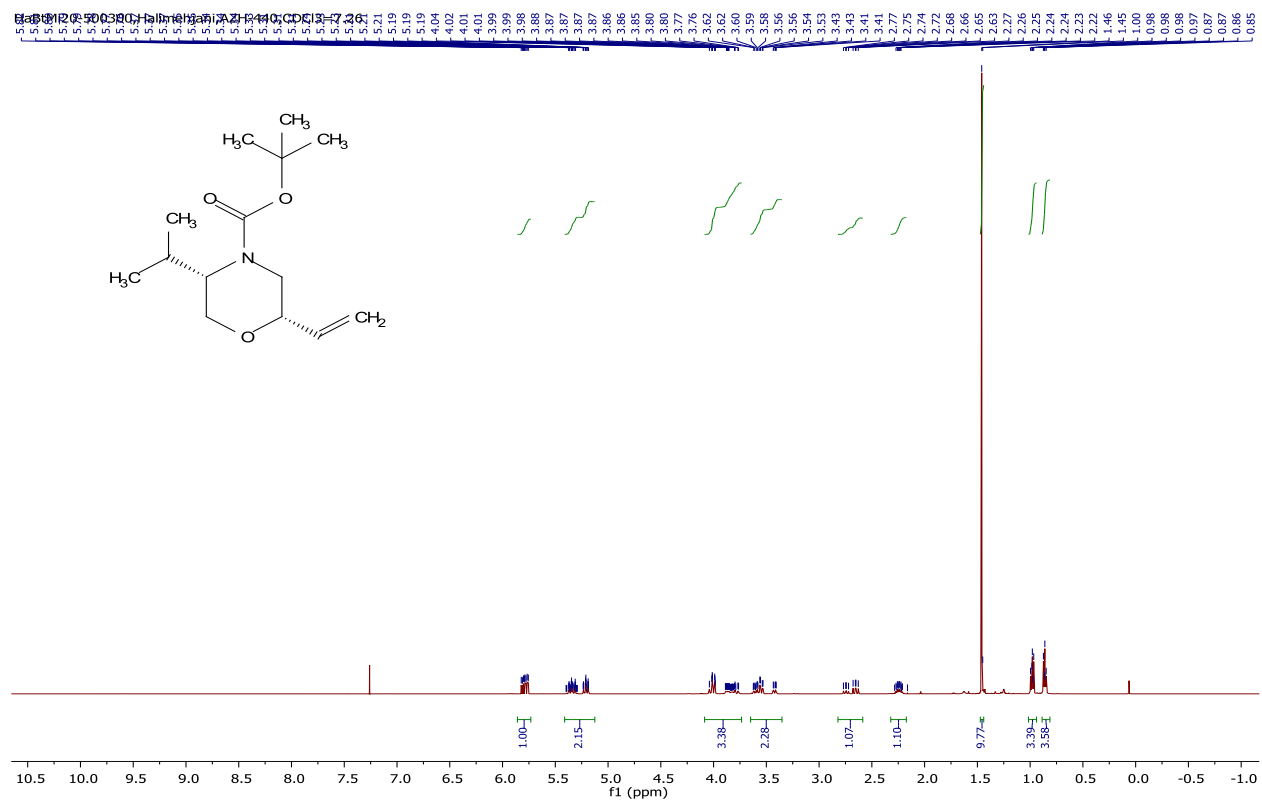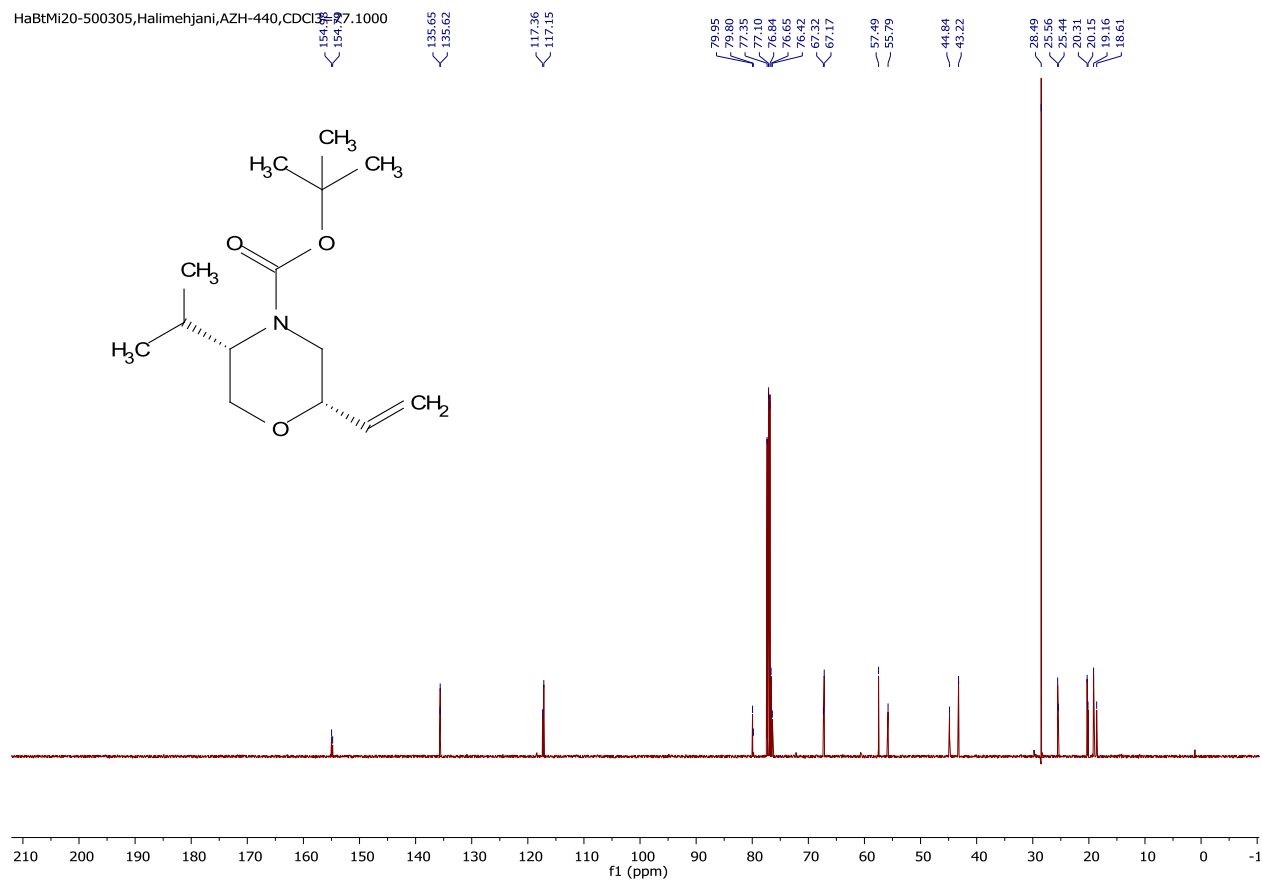

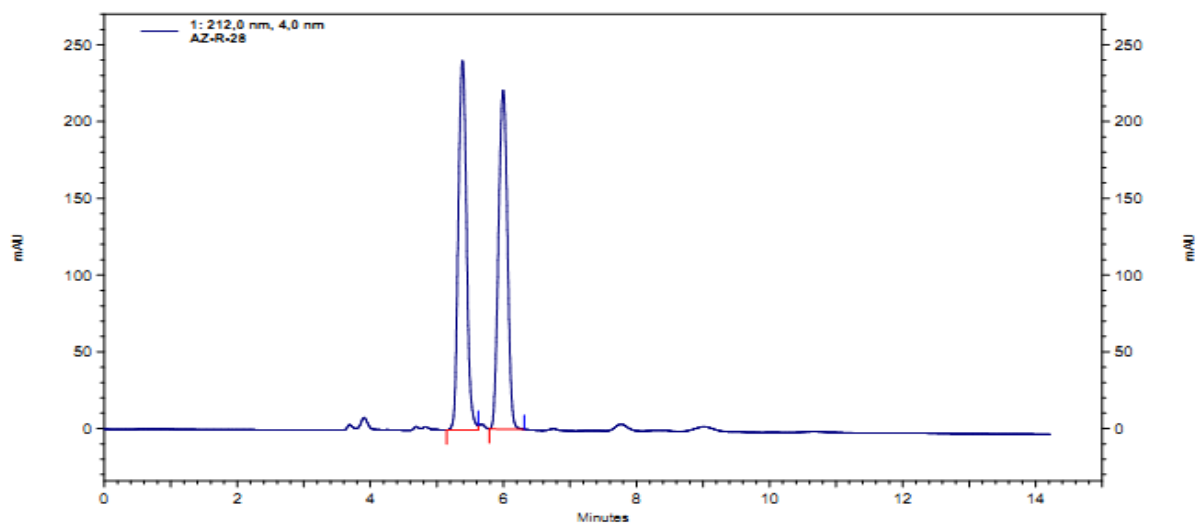

1: 212,0 nm, 4,0 nm

Results

| Peak Number | Retention Time | Area Percent | Area      |
|-------------|----------------|--------------|-----------|
| 1           | 5,385          | 50,481       | 280313787 |
| 2           | 5,995          | 49,519       | 274975389 |
| Totals      |                | 100,000      | 555289176 |

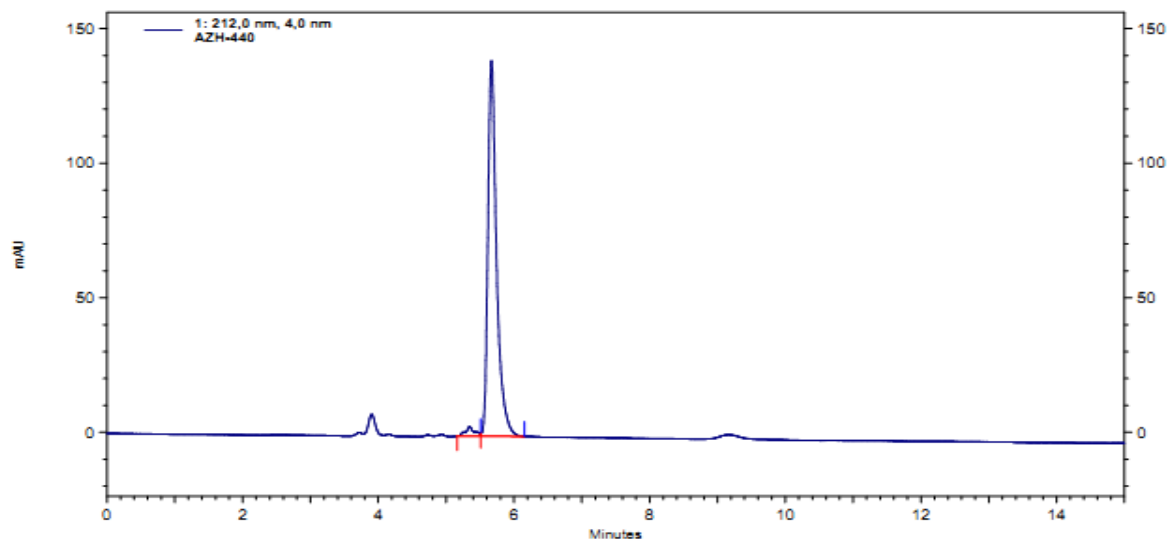

1: 212,0 nm, 4,0 nm

Results

| Peak Number | Retention Time | Area Percent | Area      |
|-------------|----------------|--------------|-----------|
| 1           | 5,347          | 2,566        | 4385991   |
| 2           | 5,667          | 97,434       | 166551997 |
| Totals      |                | 100,000      | 170937988 |



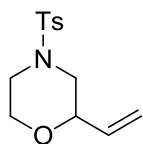

**4-tosyl-2-vinylmorpholine (2k):** (known compound)  $^1\text{H}$  NMR (500 MHz, Chloroform- $d$ )  $\delta$  7.56 (d,  $J$  = 8.3 Hz, 2H), 7.36 – 7.22 (m, 2H), 5.65 (ddd,  $J$  = 17.4, 10.7, 5.4 Hz, 1H), 5.26 (dt,  $J$  = 17.3, 1.4 Hz, 1H), 5.14 (dt,  $J$  = 10.7, 1.3 Hz, 1H), 4.06 – 3.91 (m, 1H), 3.88 (ddd,  $J$  = 11.6, 3.4, 1.6 Hz, 1H), 3.65 (td,  $J$  = 11.5, 2.7 Hz, 1H), 3.58 – 3.39 (m, 2H), 2.42 – 2.30 (m, 4H), 2.05 (dd,  $J$  = 11.4, 10.1 Hz, 1H) ppm;  $^{13}\text{C}$  NMR (101 MHz,  $\text{CDCl}_3$ )  $\delta$  144.0, 134.8, 132.4, 129.8, 127.9, 117.7, 75.7, 65.8, 50.1, 45.4, 21.6 ppm.

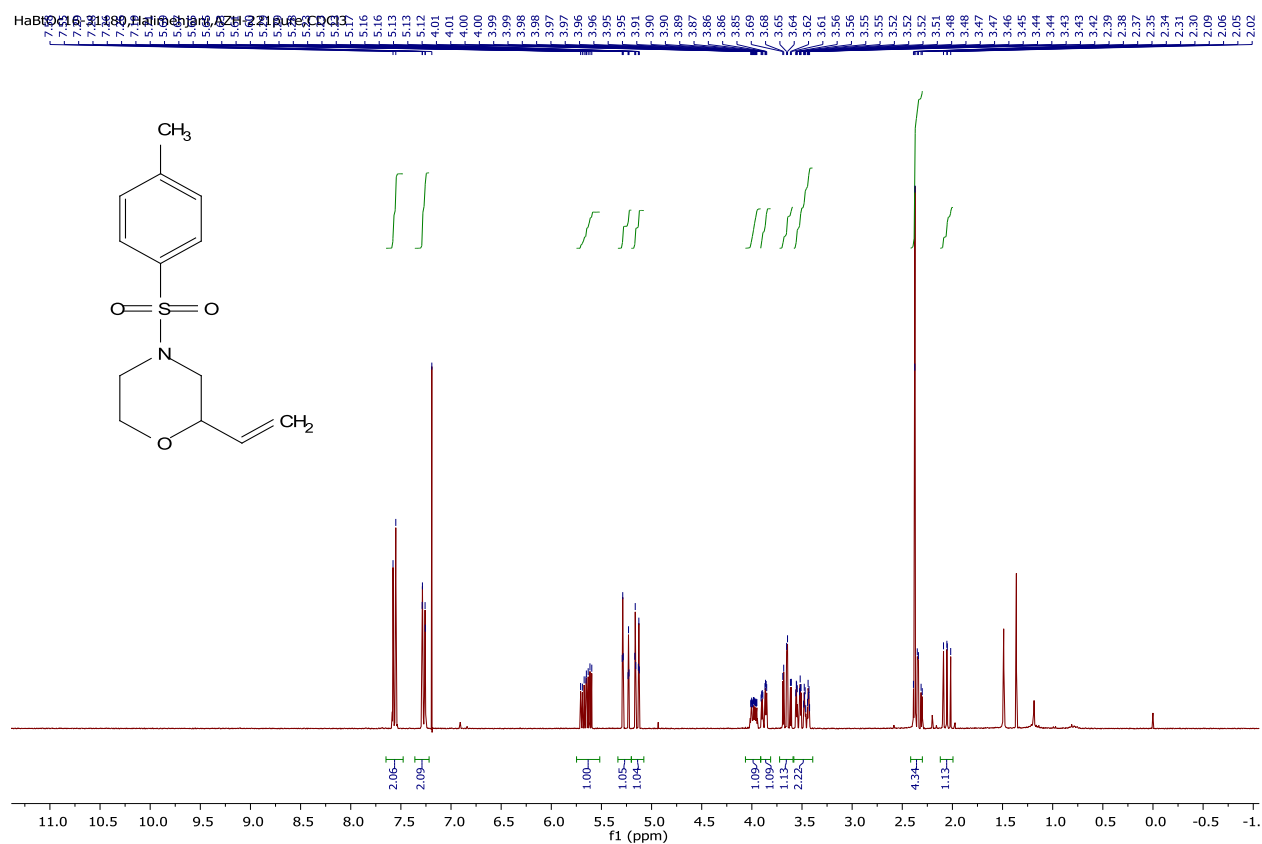

HaBtFe04-4070, Halimehjani, AZH-221, CDCl<sub>3</sub>

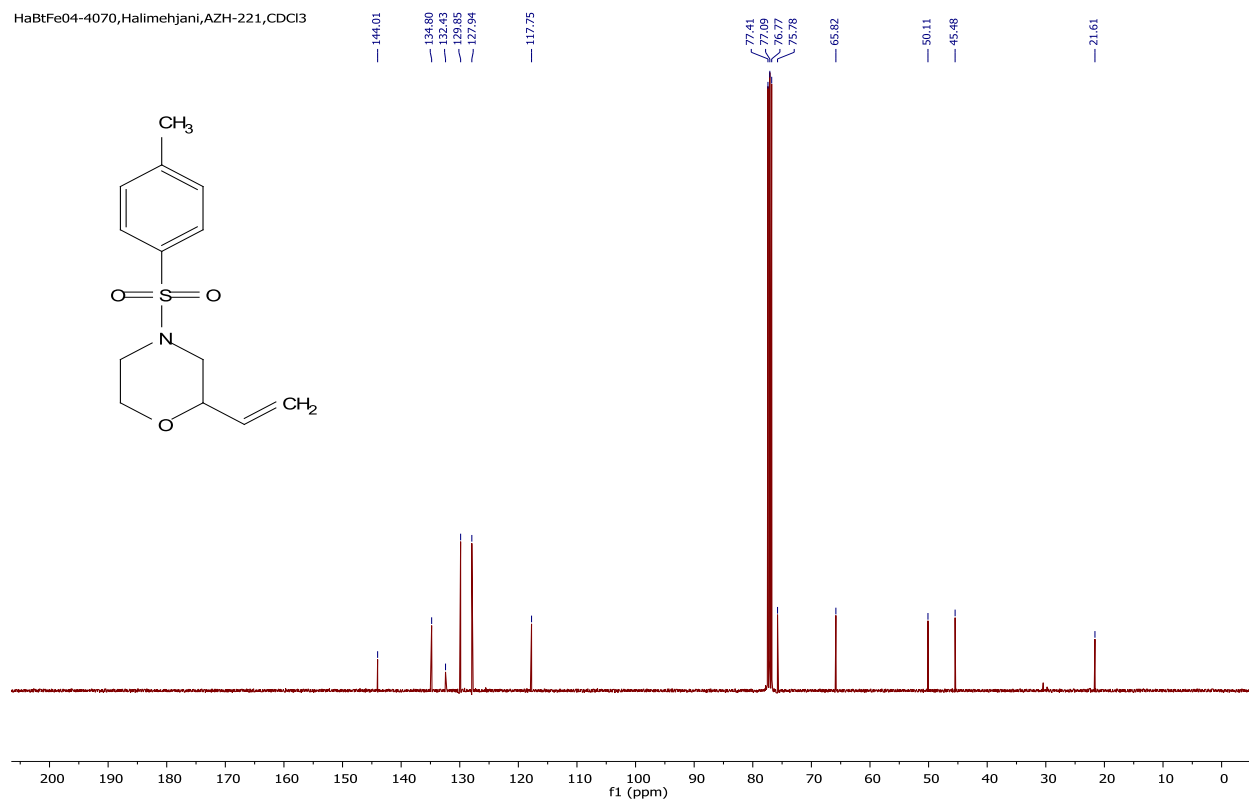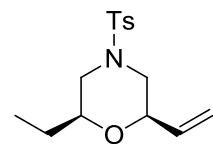

*Cis*-2-ethyl-4-tosyl-6-vinylmorpholine (**2l**): (major diastereomer) <sup>1</sup>H NMR (500 MHz, Chloroform-*d*)  $\delta$  7.63 (d,  $J$  = 8.3 Hz, 2H), 7.34 (dd,  $J$  = 8.7, 0.7 Hz, 2H), 5.72 (ddd,  $J$  = 17.4, 10.7, 5.5 Hz, 1H), 5.33 (dt,  $J$  = 17.4, 1.5 Hz, 1H), 5.20 (dt,  $J$  = 10.7, 1.4 Hz, 1H), 4.09–4.07 (m, 1H), 3.68 – 3.46 (m, 3H), 2.44 (s, 3H), 2.01–1.97 (m, 2H), 1.55 – 1.36 (m, 2H), 0.95 (t,  $J$  = 7.5 Hz, 3H) ppm; <sup>13</sup>C NMR (126 MHz, CDCl<sub>3</sub>)  $\delta$  143.9, 134.9, 132.3, 129.8, 127.8, 117.4, 76.5, 75.7, 49.7, 49.5, 26.3, 21.6, 9.7 ppm; HRMS (ESI) calcd for C<sub>15</sub>H<sub>21</sub>NO<sub>3</sub>S [M+H]<sup>+</sup>: 296.1320; found: 296.1316.

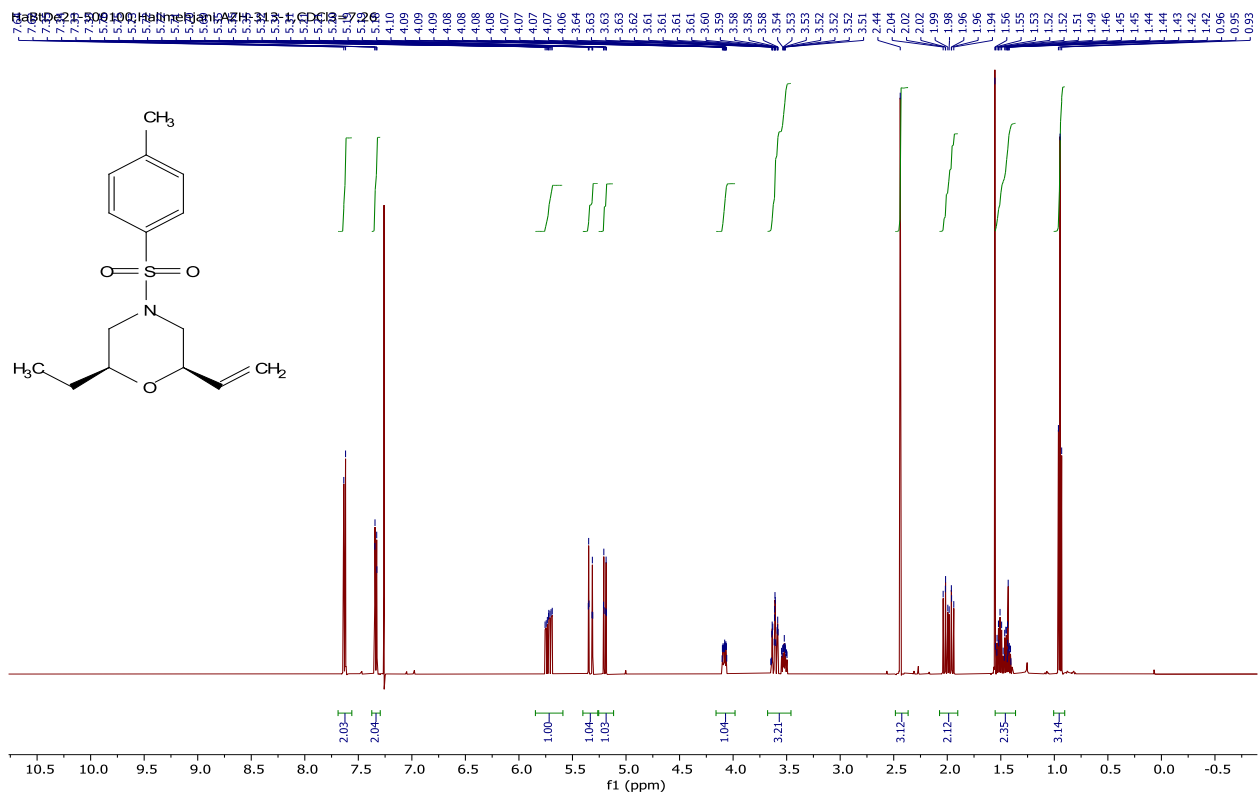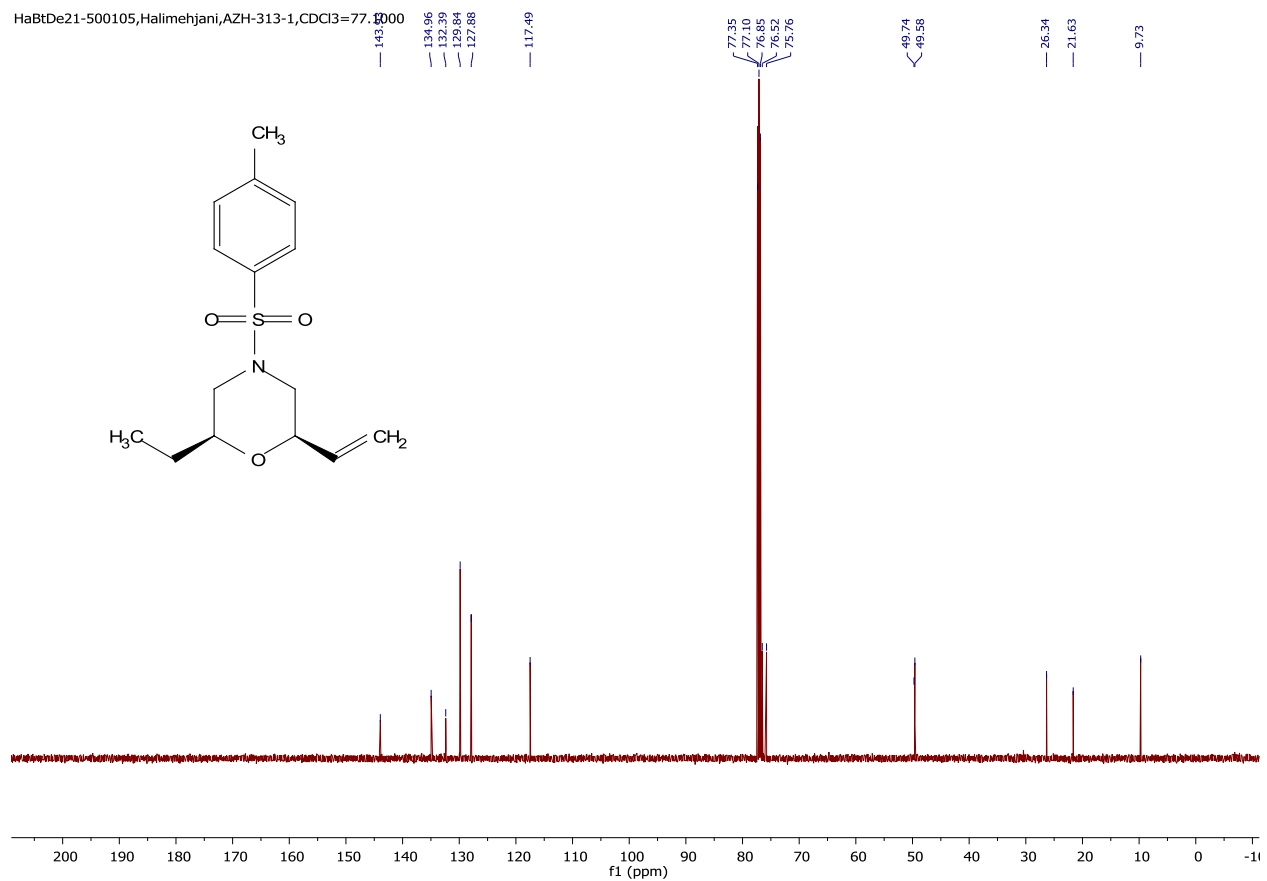

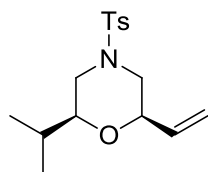

*Cis-2-isopropyl-4-tosyl-6-vinylmorpholine (2m)*: (major diastereomer)  $^1\text{H}$  NMR (500 MHz, Chloroform- $d$ )  $\delta$  7.63 (d,  $J$  = 8.3 Hz, 2H), 7.39 – 7.31 (m, 2H), 5.73 (ddd,  $J$  = 17.4, 10.8, 5.2 Hz, 1H), 5.33 (dt,  $J$  = 17.4, 1.5 Hz, 1H), 5.18 (dt,  $J$  = 10.7, 1.5 Hz, 1H), 4.09–4.04 (m, 1H), 3.69 – 3.51 (m, 2H), 3.30 (ddd,  $J$  = 10.5, 6.8, 2.4 Hz, 1H), 2.44 (s, 3H), 2.00 (ddd,  $J$  = 11.2, 10.4, 9.7 Hz, 2H), 1.69–1.65 (m, 1H), 0.95 (d,  $J$  = 6.8 Hz, 3H), 0.90 (d,  $J$  = 6.9 Hz, 3H) ppm;  $^{13}\text{C}$  NMR (126 MHz,  $\text{CDCl}_3$ )  $\delta$  143.8, 135.0, 132.4, 129.8, 127.8, 117.1, 79.9, 75.6, 49.7, 47.7, 31.3, 21.6, 18.5, 18.4 ppm; HRMS (ESI) calcd for  $\text{C}_{16}\text{H}_{23}\text{NO}_3\text{S}$   $[\text{M}+\text{H}]^+$ : 310.1477; found: 310.1479.

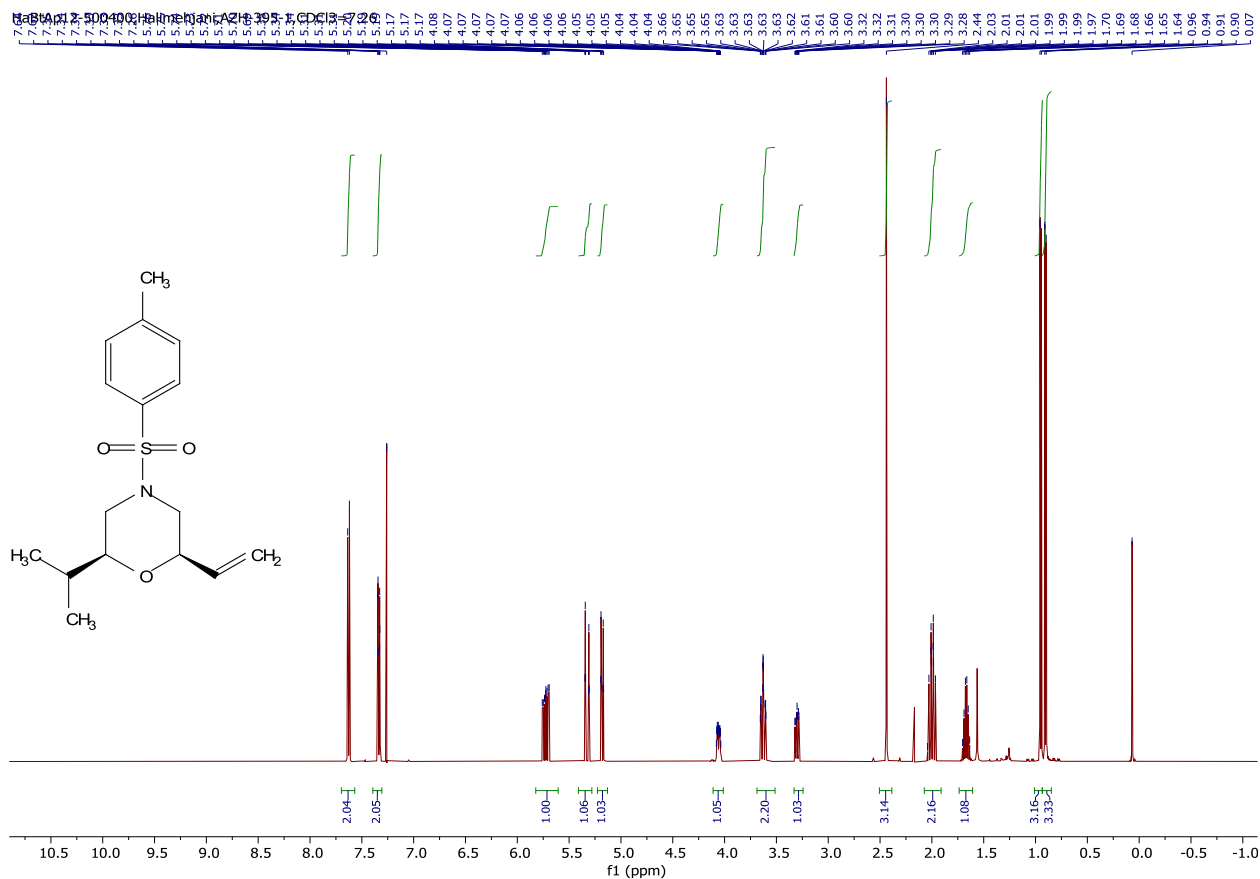

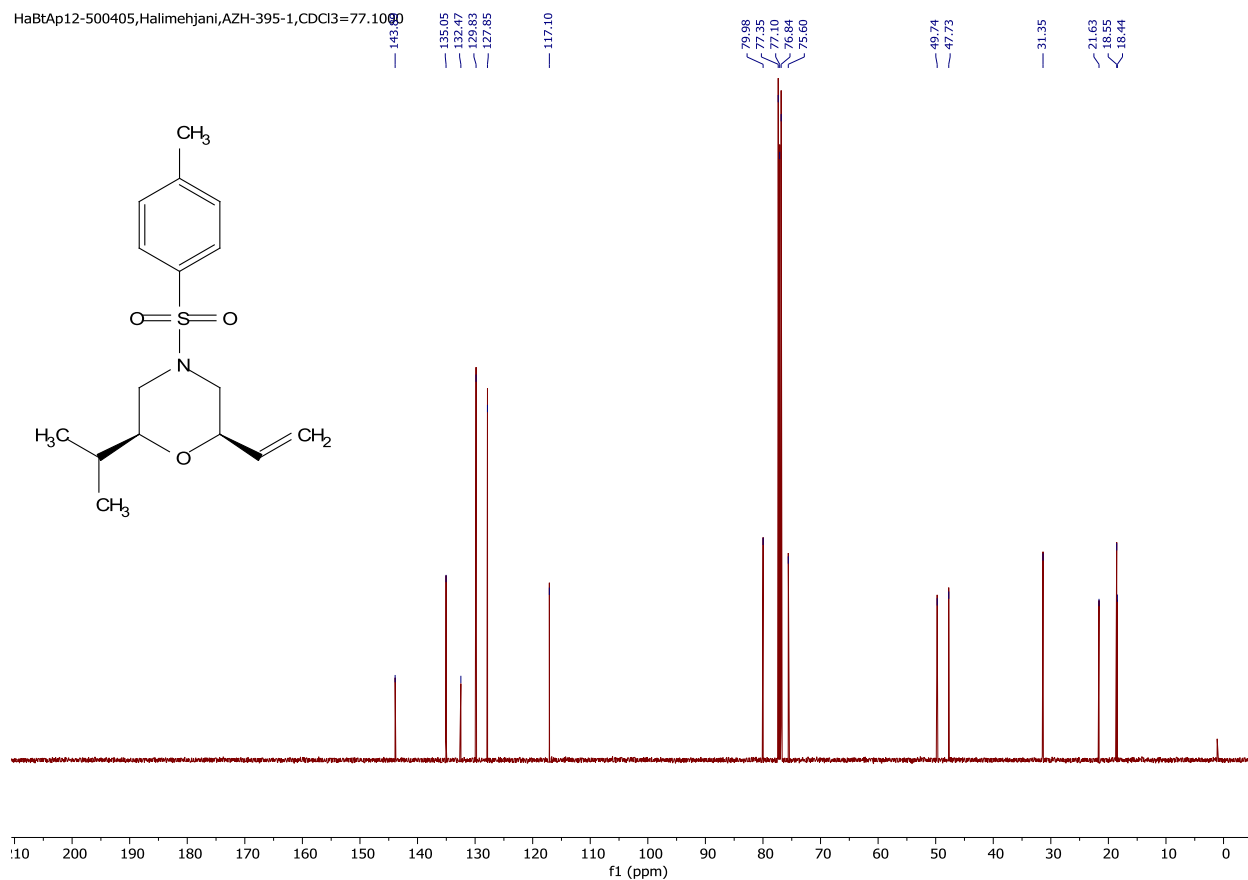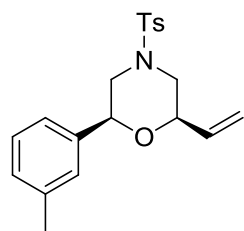

*Cis*-2-(*m*-tolyl)-4-tosyl-6-vinylmorpholine (**2n**): (major diastereomer) <sup>1</sup>H NMR (500 MHz, Chloroform-*d*) δ 7.61 (d, *J* = 8.3 Hz, 2H), 7.31 (dd, *J* = 8.5, 0.8 Hz, 2H), 7.22 (t, *J* = 7.5 Hz, 1H), 7.16 – 7.07 (m, 3H), 5.82 (ddd, *J* = 17.4, 10.7, 5.4 Hz, 1H), 5.42 (dt, *J* = 17.4, 1.4 Hz, 1H), 5.25 (dt, *J* = 10.8, 1.3 Hz, 1H), 4.67 (dd, *J* = 10.4, 2.7 Hz, 1H), 4.30–4.26 (m, 1H), 3.78–3.74 (m, 2H), 2.43 (s, 3H), 2.34 (s, 3H), 2.22 – 2.10 (m, 2H) ppm; <sup>13</sup>C NMR (126 MHz, CDCl<sub>3</sub>) δ 144.0, 138.6, 138.2, 134.6, 132.3, 129.8, 129.0, 128.4, 127.8, 126.7, 123.2, 117.7, 77.1, 76.1, 51.6, 49.6, 21.6, 21.5 ppm; HRMS (ESI) calcd for C<sub>20</sub>H<sub>23</sub>NO<sub>3</sub>S [M+H]<sup>+</sup>: 358.1477; found: 358.1472.

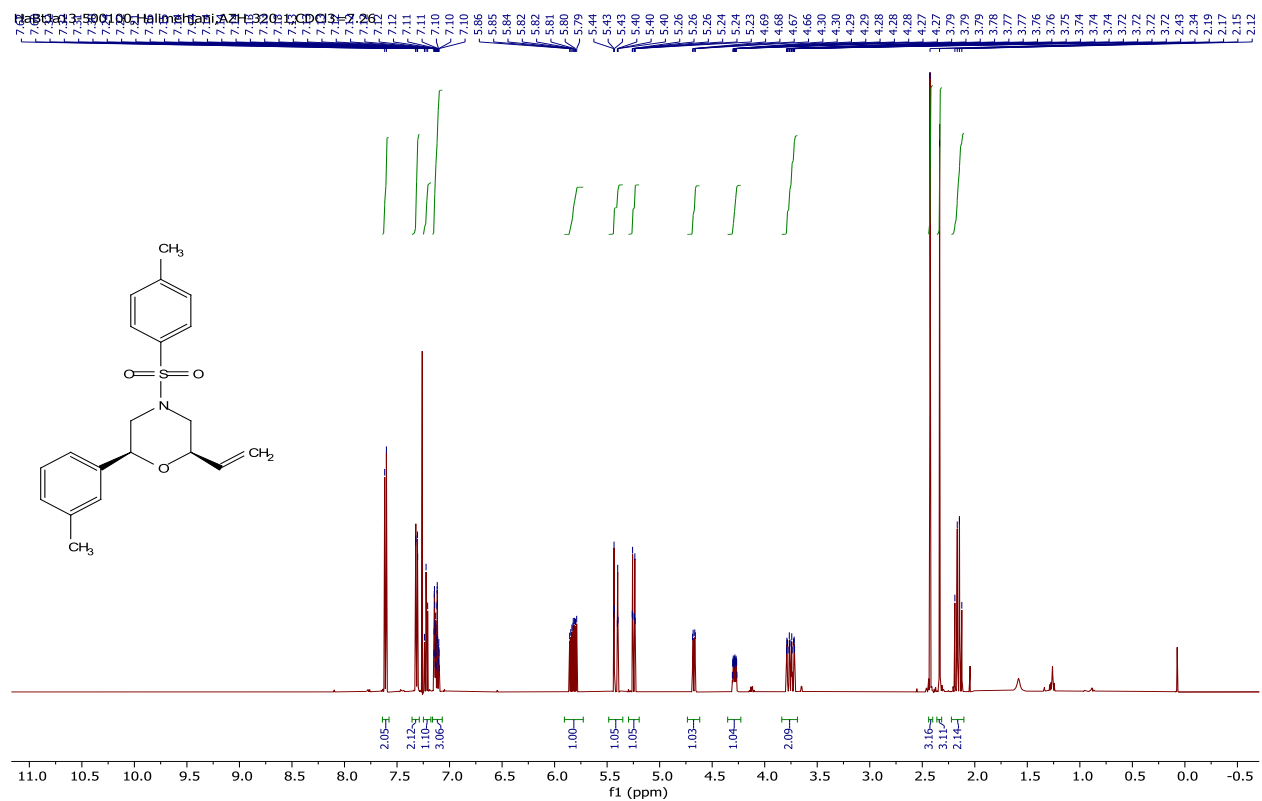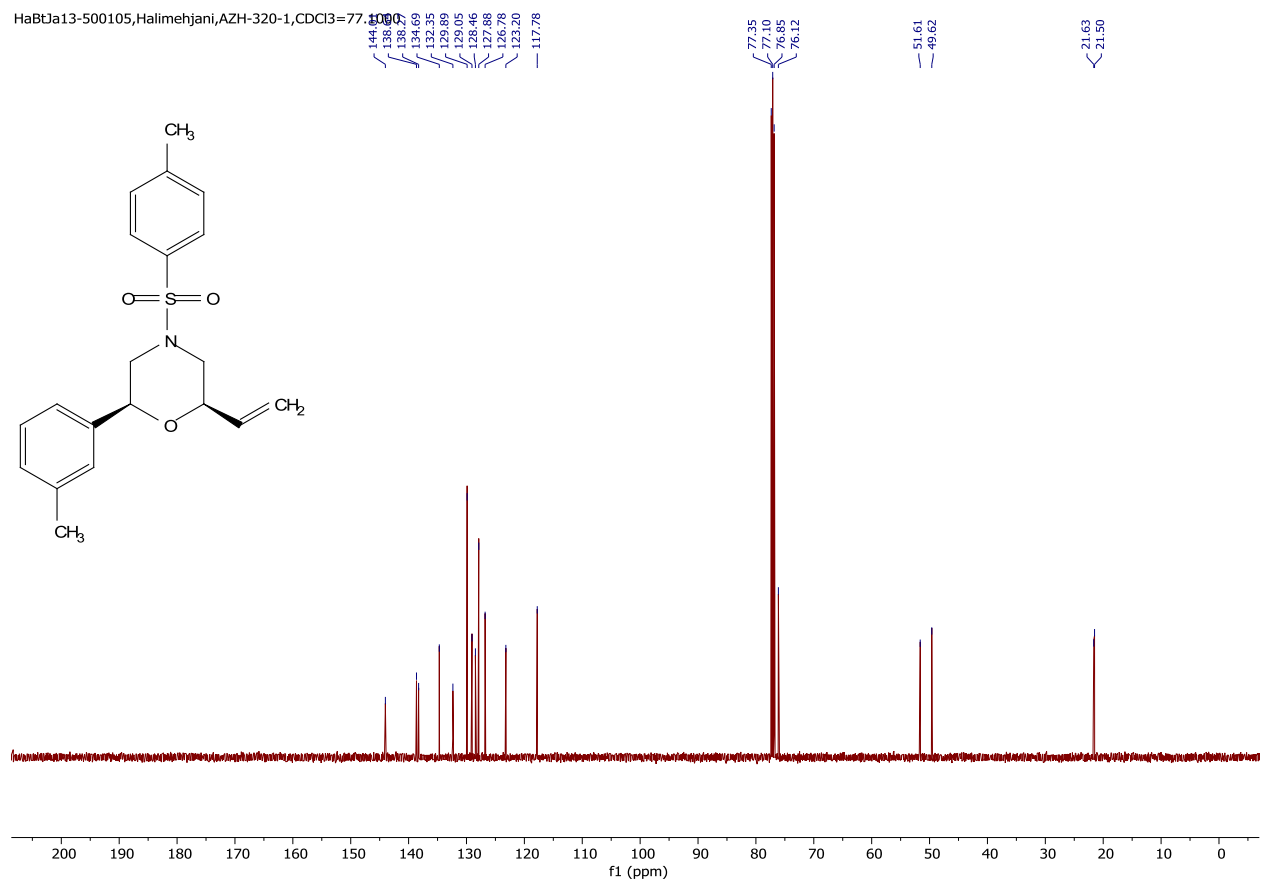

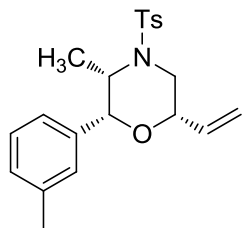

(2*R*,3*S*,6*S*)-3-methyl-2-(*m*-tolyl)-4-tosyl-6-vinylmorpholine (**4a**):  $^1\text{H}$  NMR (500 MHz, Chloroform-*d*)  $\delta$  7.73 (d,  $J$  = 8.3 Hz, 2H), 7.34 – 7.28 (m, 2H), 7.23–7.20 (m, 1H), 7.15 – 7.00 (m, 3H), 5.88 (ddd,  $J$  = 17.4, 10.7, 5.2 Hz, 1H), 5.46 (dt,  $J$  = 17.4, 1.5 Hz, 1H), 5.28 (dt,  $J$  = 10.8, 1.4 Hz, 1H), 4.71 (d,  $J$  = 2.9 Hz, 1H), 4.28 – 3.98 (m, 2H), 3.70 (ddd,  $J$  = 13.0, 3.2, 0.9 Hz, 1H), 2.90 (dd,  $J$  = 13.0, 11.0 Hz, 1H), 2.42 (s, 3H), 2.34 (s, 3H), 0.70 (d,  $J$  = 6.8 Hz, 3H) ppm;  $^{13}\text{C}$  NMR (126 MHz,  $\text{CDCl}_3$ )  $\delta$  143.5, 138.6, 137.9, 137.7, 134.8, 129.9, 128.2, 128.2, 127.1, 126.1, 122.5, 117.5, 79.9, 76.6, 52.6, 43.7, 21.6, 21.5, 9.1 ppm; HRMS (ESI) calcd for  $\text{C}_{21}\text{H}_{25}\text{NO}_3\text{S}$   $[\text{M}+\text{H}]^+$ : 372.1633; found: 372.1626; **HPLC** (ChiralPAK AD-3, heptane/EtOH = 85:15, 0.5 mL/min)  $t_R$  = 8.02 min (major),  $t_R$  = 9.48 min (minor), 88.3% ee;  $[\alpha]_D^{25}$  = -3.58 ( $c$  = 0.475,  $\text{CH}_2\text{Cl}_2$ ).

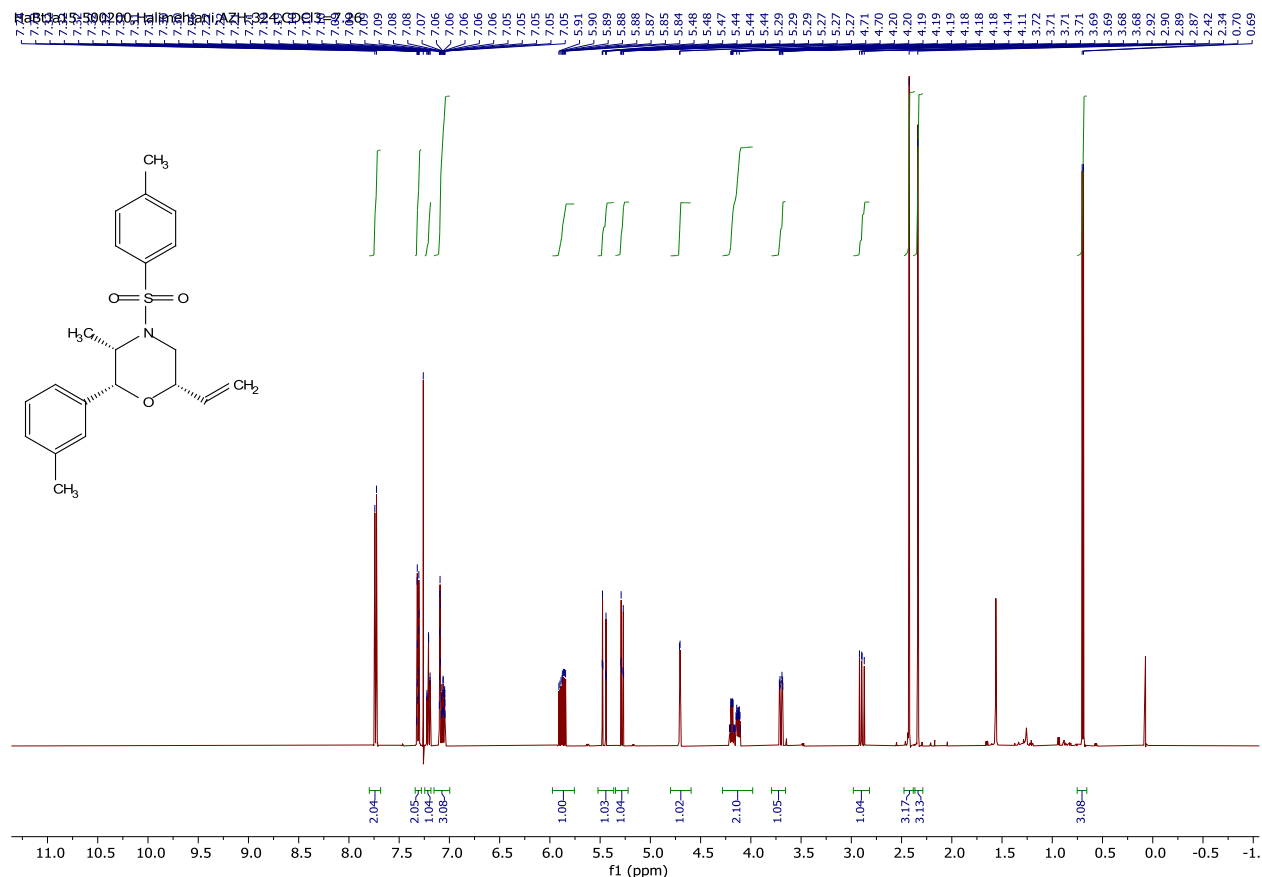

HaBtJa15-500205, Halimehjani, AZH-324, CDCl<sub>3</sub>=77.10000

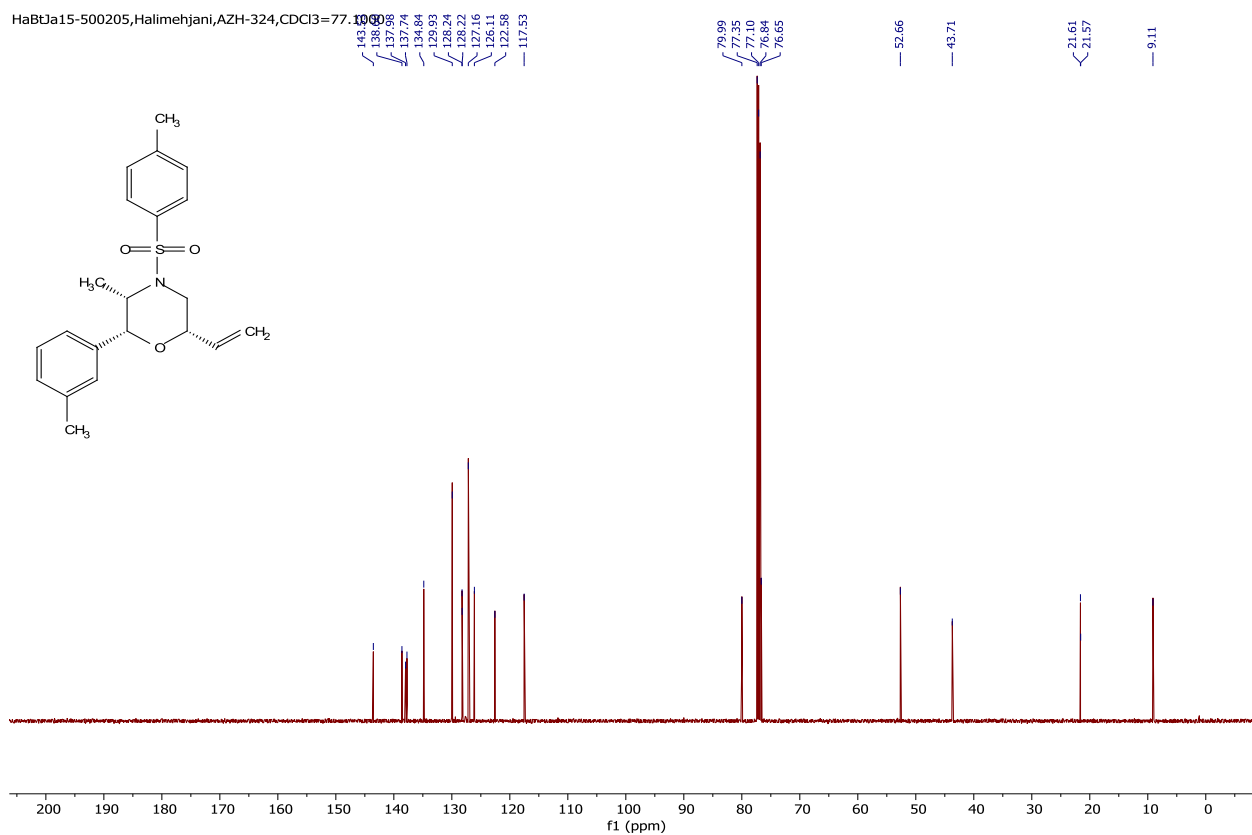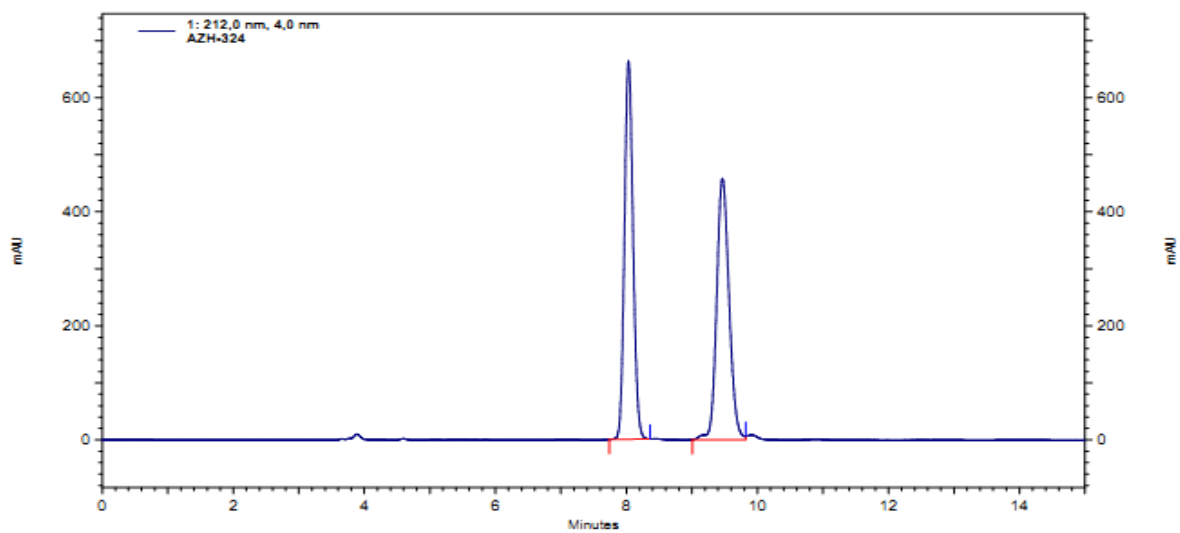

1: 212,0 nm, 4,0 nm

Results

| Peak Number | Retention Time | Area Percent | Area       |
|-------------|----------------|--------------|------------|
| 1           | 8,032          | 49,938       | 809821709  |
| 2           | 9,465          | 50,062       | 811824830  |
| Totals      |                | 100,000      | 1621646539 |



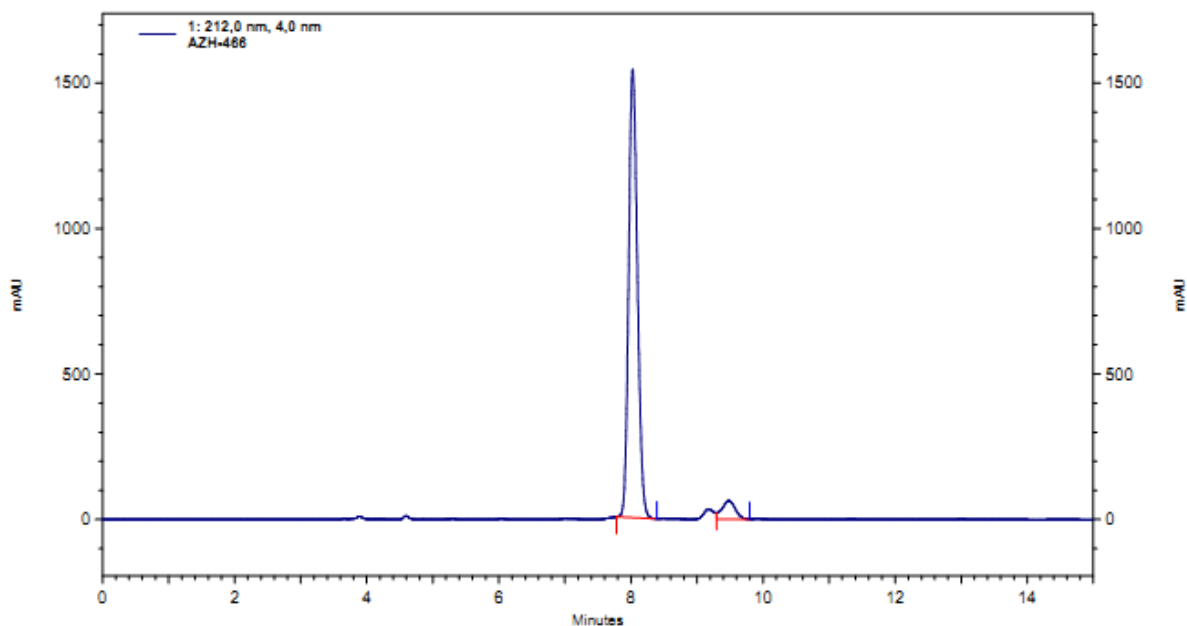

1: 212,0 nm, 4,0 nm  
Results

| Peak Number | Retention Time | Area Percent | Area       |
|-------------|----------------|--------------|------------|
| 1           | 8,025          | 94,159       | 1911723958 |
| 2           | 9,483          | 5,841        | 118587235  |

  

|        |  |         |            |
|--------|--|---------|------------|
| Totals |  | 100,000 | 2030311193 |
|--------|--|---------|------------|

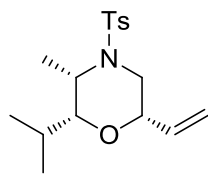

(2*R*,3*S*,6*S*)-2-isopropyl-3-methyl-4-tosyl-6-vinylmorpholine (**4b**):  $^1\text{H}$  NMR (500 MHz, Chloroform-*d*)  $\delta$  7.69 (d,  $J$  = 8.4 Hz, 2H), 7.34 – 7.29 (m, 2H), 5.76 (ddd,  $J$  = 17.4, 10.7, 5.2 Hz, 1H), 5.36 – 5.30 (m, 1H), 5.26 – 5.16 (m, 1H), 4.05–4.01 (m, 1H), 3.89–3.86 (m, 1H), 3.58 (ddd,  $J$  = 12.8, 3.1, 0.8 Hz, 1H), 3.02 (dd,  $J$  = 9.9, 2.5 Hz, 1H), 2.78 (dd,  $J$  = 12.8, 11.0 Hz, 1H), 2.43 (s, 3H), 1.58–1.53 (m, 2H), 0.96 (d,  $J$  = 6.5 Hz, 3H), 0.92 (d,  $J$  = 6.8 Hz, 3H), 0.85 (d,  $J$  = 6.7 Hz, 3H) ppm;  $^{13}\text{C}$  NMR (126 MHz,  $\text{CDCl}_3$ )  $\delta$  143.3, 137.9, 135.1, 129.8, 127.1, 117.1, 84.7, 76.5, 49.6, 43.8, 29.5, 21.6, 19.7, 17.8, 9.2 ppm; HRMS (ESI) calcd for  $\text{C}_{17}\text{H}_{25}\text{NO}_3\text{S}$   $[\text{M}+\text{H}]^+$ : 324.1633; found: 324.1630; **HPLC** (ChiralPAK AD-3, heptane/EtOH = 95:5, 0.5 mL/min)  $t_R$  = 8.16 min (major),  $t_R$  = 9.24 min (minor), 90% ee;  $[\alpha]_D^{25}$  = 40.83 ( $c$  = 0.6,  $\text{CH}_2\text{Cl}_2$ ).

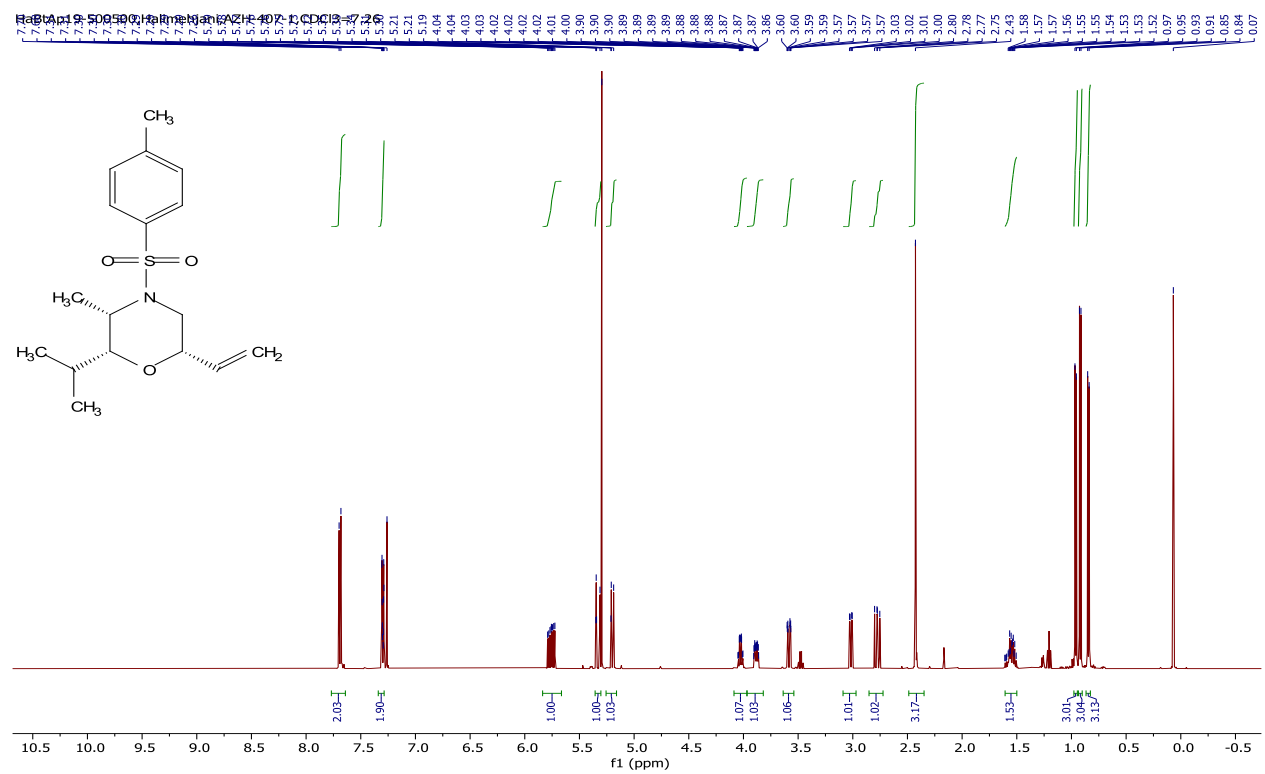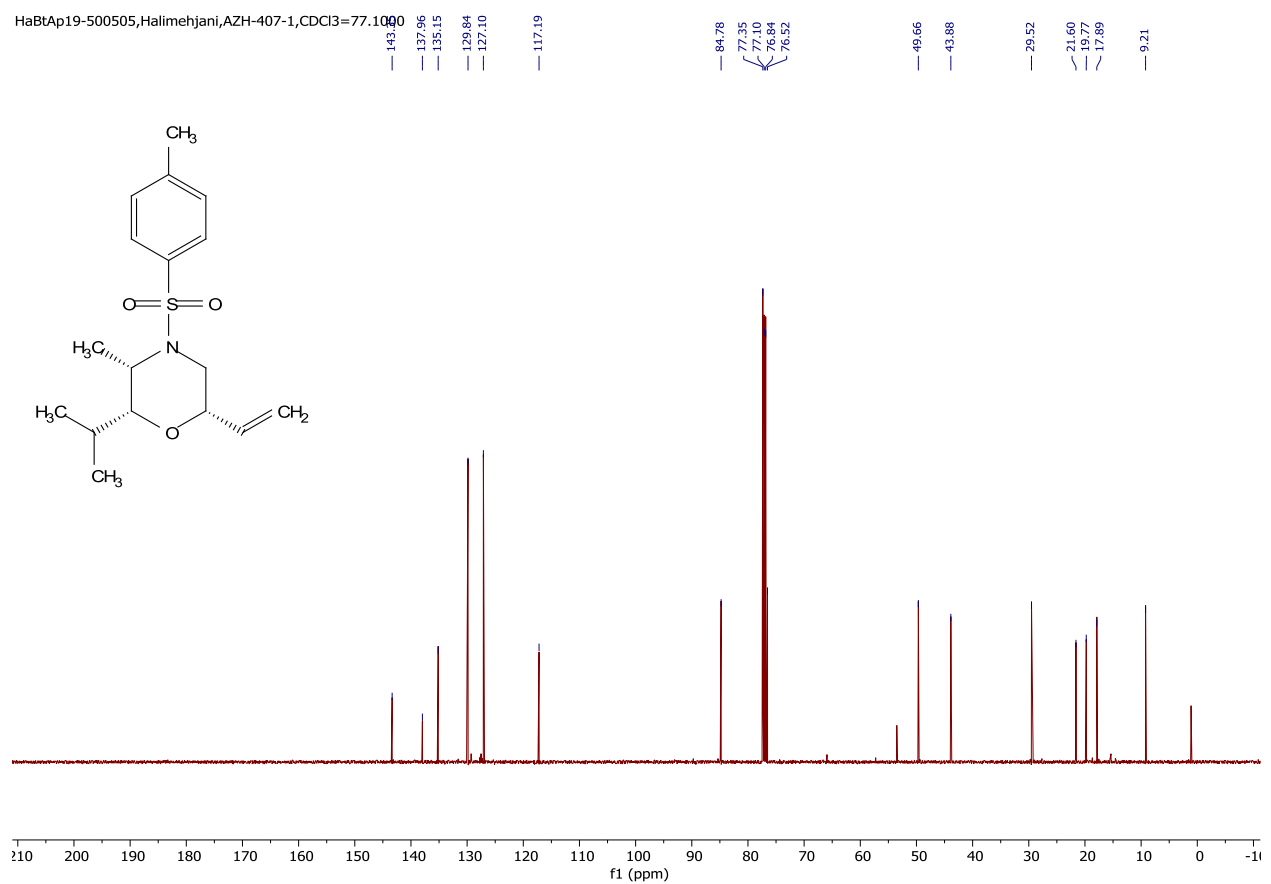

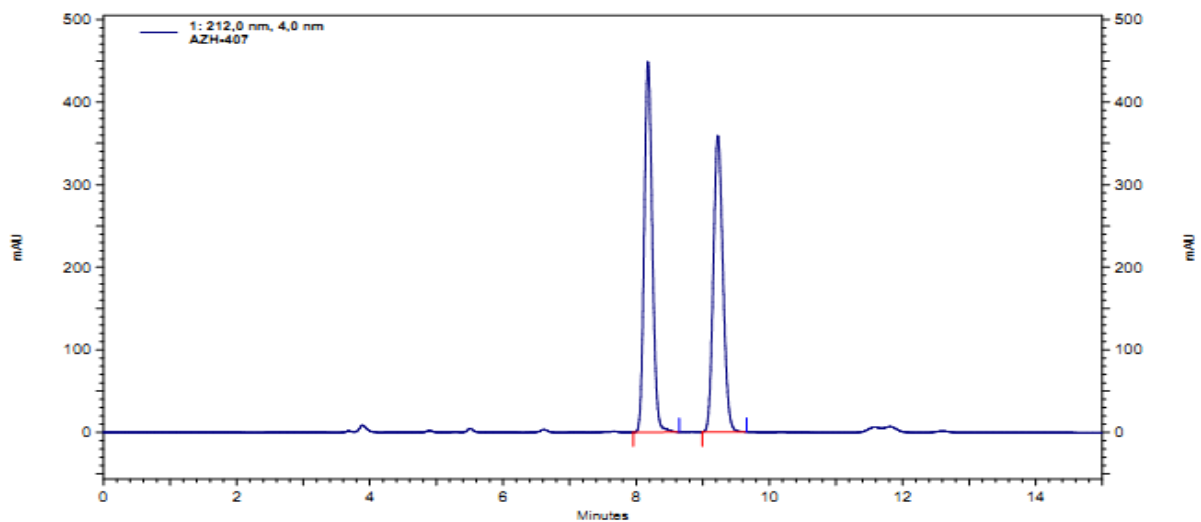

1: 212,0 nm, 4,0 nm

Results

| Peak Number | Retention Time | Area Percent | Area      |
|-------------|----------------|--------------|-----------|
| 1           | 8,177          | 51,388       | 511423176 |
| 2           | 9,227          | 48,612       | 483793879 |
| Totals      |                | 100,000      | 995217055 |

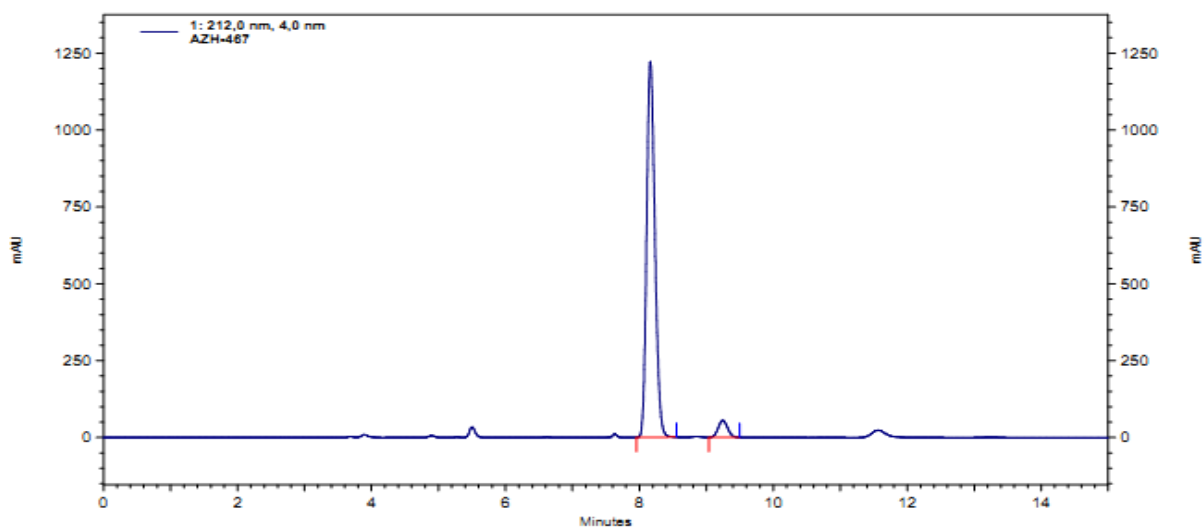

1: 212,0 nm, 4,0 nm

Results

| Peak Number | Retention Time | Area Percent | Area       |
|-------------|----------------|--------------|------------|
| 1           | 8,163          | 95,068       | 1411457859 |
| 2           | 9,245          | 4,932        | 73224613   |
| Totals      |                | 100,000      | 1484682472 |

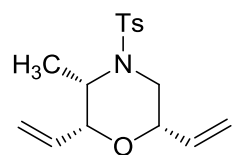

(2*R*,3*S*,6*S*)-3-methyl-4-tosyl-2,6-divinylmorpholine (**4c**):  $^1\text{H}$  NMR (500 MHz, Chloroform-*d*)  $\delta$  7.70 (d,  $J$  = 8.3 Hz, 2H), 7.35 – 7.28 (m, 2H), 5.79 (ddd,  $J$  = 17.4, 10.7, 5.5 Hz, 1H), 5.67 (ddd,  $J$  = 17.4, 10.8, 5.1 Hz, 1H), 5.43 – 5.10 (m, 4H), 4.15–4.11 (m, 1H), 4.07 – 3.86 (m, 2H), 3.61 (ddd,  $J$  = 12.9, 3.2, 0.9 Hz, 1H), 2.81 (dd,  $J$  = 12.9, 11.0 Hz, 1H), 2.43 (s, 3H), 0.91 (d,  $J$  = 6.8 Hz, 3H) ppm;  $^{13}\text{C}$  NMR (126 MHz,  $\text{CDCl}_3$ )  $\delta$  143.5, 137.7, 134.7, 134.7, 129.9, 127.1, 117.6, 116.9, 79.3, 76.2, 51.4, 43.6, 21.6, 9.4 ppm; HRMS (ESI) calcd for  $\text{C}_{16}\text{H}_{21}\text{NO}_3\text{S}$   $[\text{M}+\text{H}]^+$ : 308.1320; found: 308.1318; **HPLC** (ChiralPAK AD-3, heptane/isopropanol = 95:5, 0.5 mL/min)  $t_R$  = 11.88 min (minor),  $t_R$  = 13.00 min (major), 89% ee;  $[\alpha]_D^{25}$  = 53.7 ( $c$  = 0.525,  $\text{CH}_2\text{Cl}_2$ ).

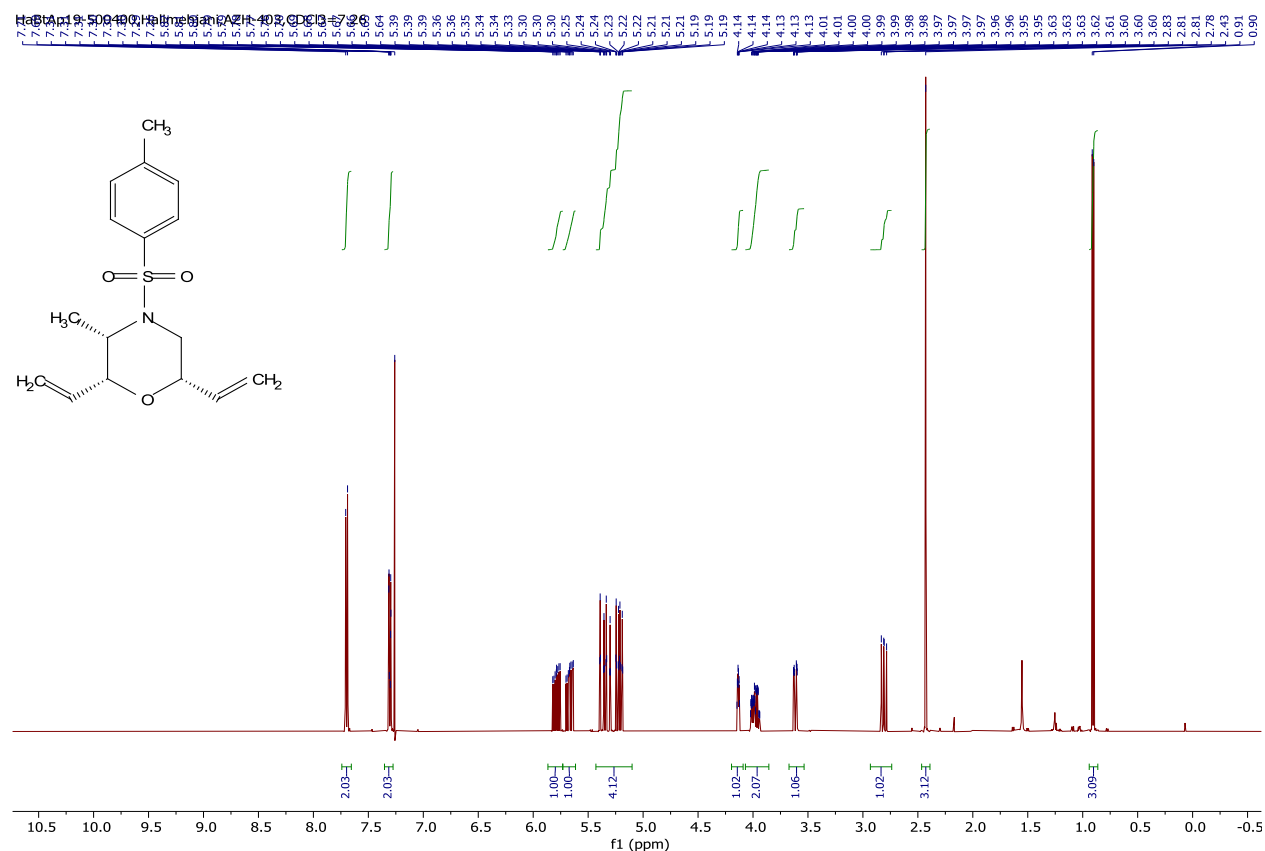

HaBtAp19-500406, Halimehjani, AZH-403, CDCl<sub>3</sub> = 77.1000

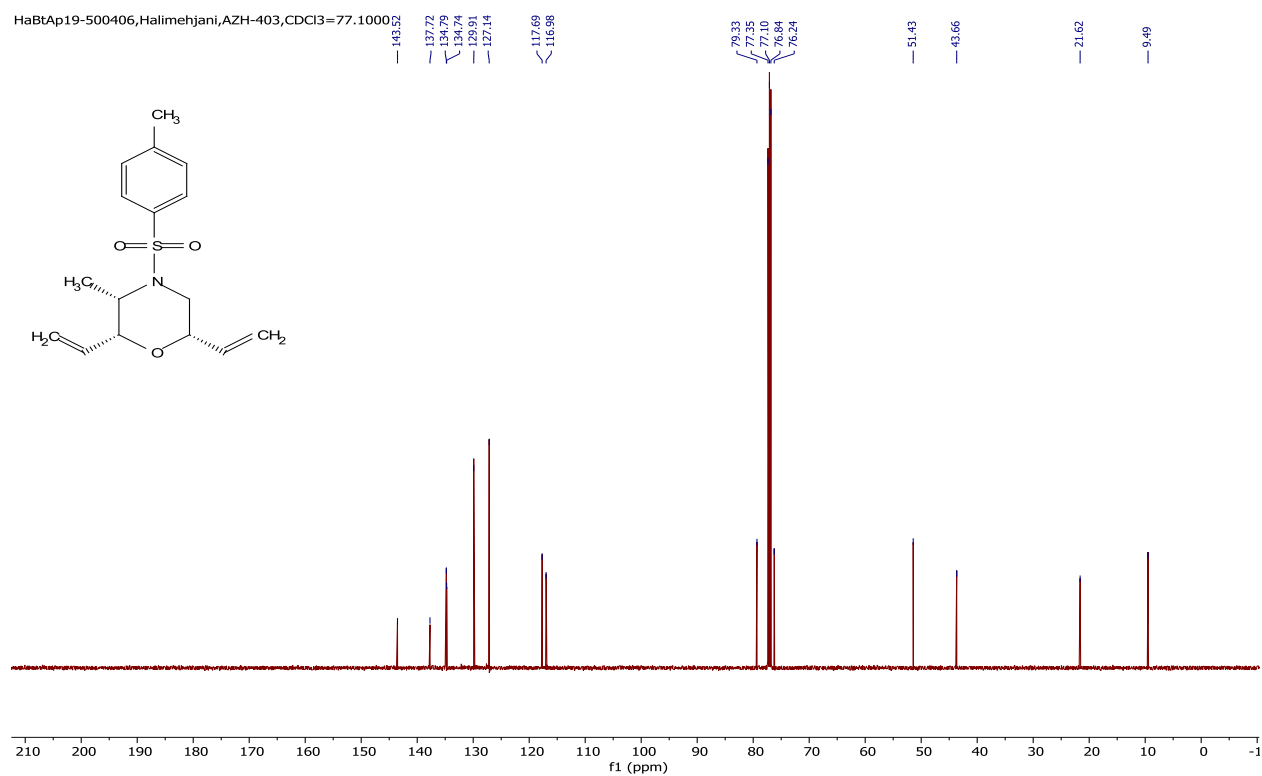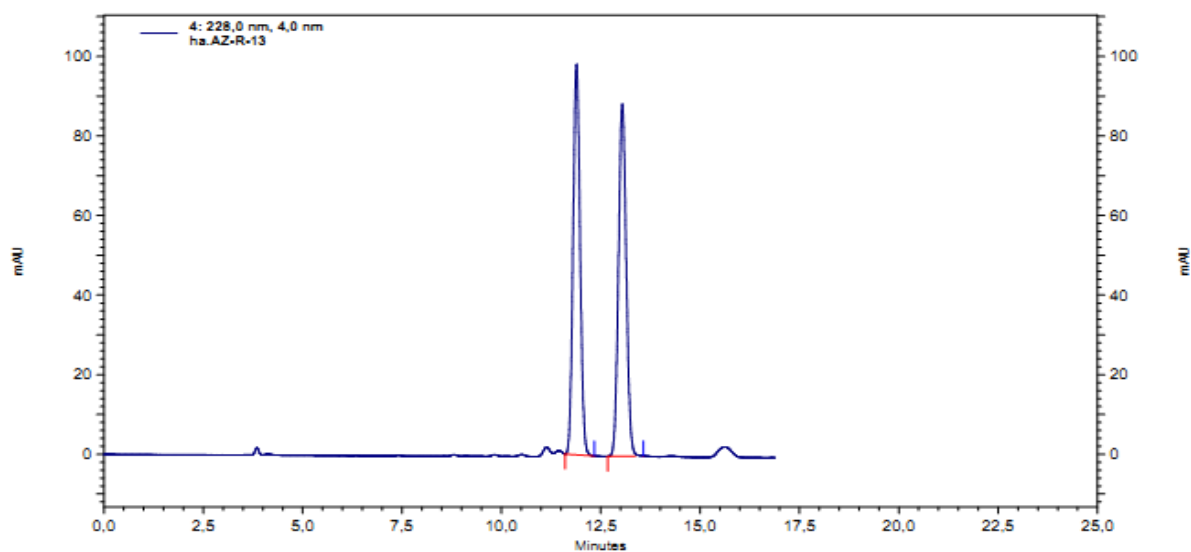

4: 228,0 nm, 4,0 nm

Results

| Peak Number | Retention Time | Area Percent | Area      |
|-------------|----------------|--------------|-----------|
| 1           | 11,890         | 49,898       | 161415316 |
| 2           | 13,042         | 50,102       | 162074809 |

|        |  |         |           |
|--------|--|---------|-----------|
| Totals |  | 100,000 | 323490125 |
|--------|--|---------|-----------|

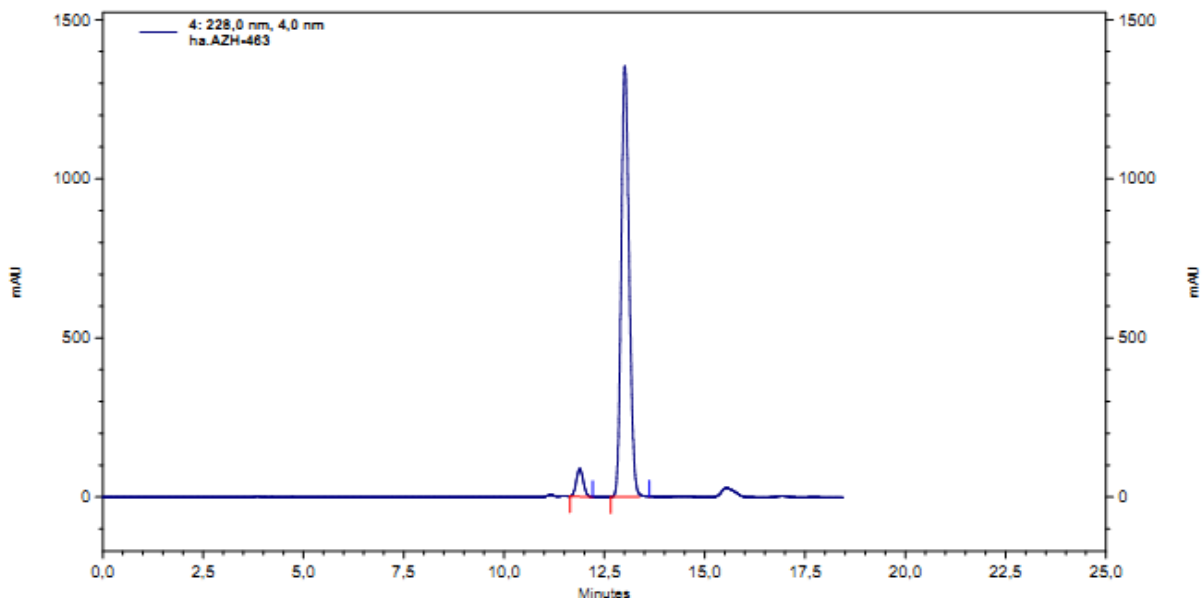

4: 228,0 nm, 4,0 nm  
Results

| Peak Number | Retention Time | Area Percent | Area       |
|-------------|----------------|--------------|------------|
| 1           | 11,885         | 5,380        | 143359731  |
| 2           | 13,008         | 94,620       | 2521452816 |
| Totals      |                | 100,000      | 2664812547 |

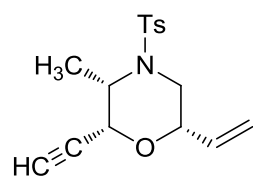

(2*R*,3*S*,6*S*)-2-ethynyl-3-methyl-4-tosyl-6-vinylmorpholine (**4d**):  $^1\text{H}$  NMR (500 MHz, Chloroform-*d*)  $\delta$  7.69 (d,  $J$  = 8.3 Hz, 2H), 7.36 – 7.30 (m, 2H), 5.76 (ddd,  $J$  = 17.4, 10.7, 5.7 Hz, 1H), 5.36 (dt,  $J$  = 17.4, 1.3 Hz, 1H), 5.25 (dt,  $J$  = 10.7, 1.2 Hz, 1H), 4.38 (t,  $J$  = 2.6 Hz, 1H), 4.11 – 3.92 (m, 2H), 3.62 (ddd,  $J$  = 13.2, 3.1, 0.9 Hz, 1H), 2.85 (dd,  $J$  = 13.2, 10.9 Hz, 1H), 2.52 (d,  $J$  = 2.3 Hz, 1H), 2.44 (s, 3H), 1.14 (d,  $J$  = 6.8 Hz, 3H) ppm;  $^{13}\text{C}$  NMR (126 MHz,  $\text{CDCl}_3$ )  $\delta$  143.7, 137.3, 134.0, 130.0, 127.1, 118.5, 79.4, 76.9, 75.7, 70.0, 51.2, 43.3, 21.6, 9.8 ppm; HRMS (ESI) calcd for  $\text{C}_{16}\text{H}_{19}\text{NO}_3\text{S}$   $[\text{M}+\text{H}]^+$ : 306.1164; found: 306.1161; **HPLC** (L-C4 column, heptane/isopropanol = 90:10, 0.5 mL/min)  $t_R$  = 15.1 min (minor),  $t_R$  = 17.3 min (major), 90.5% ee;  $[\alpha]_D^{25}$  = 8.18 ( $c$  = 0.22,  $\text{CH}_2\text{Cl}_2$ ).

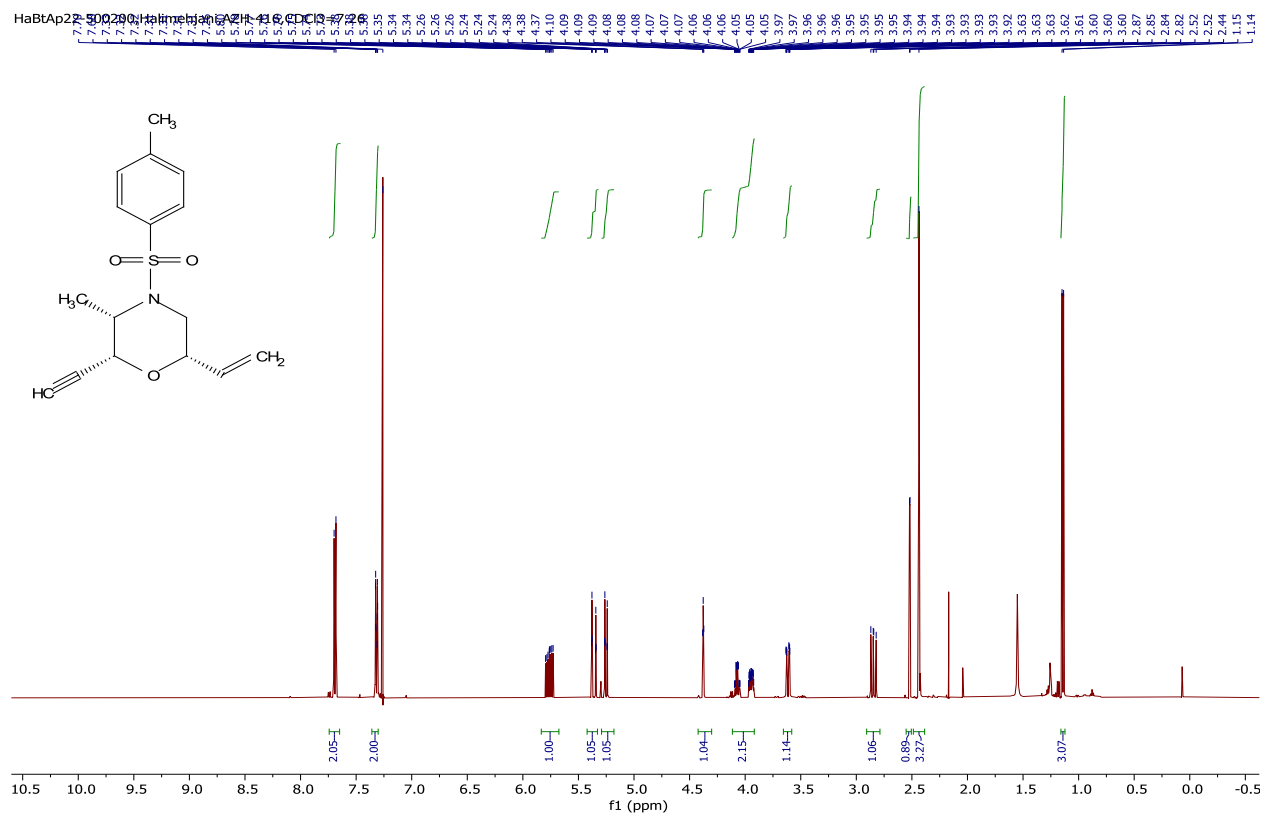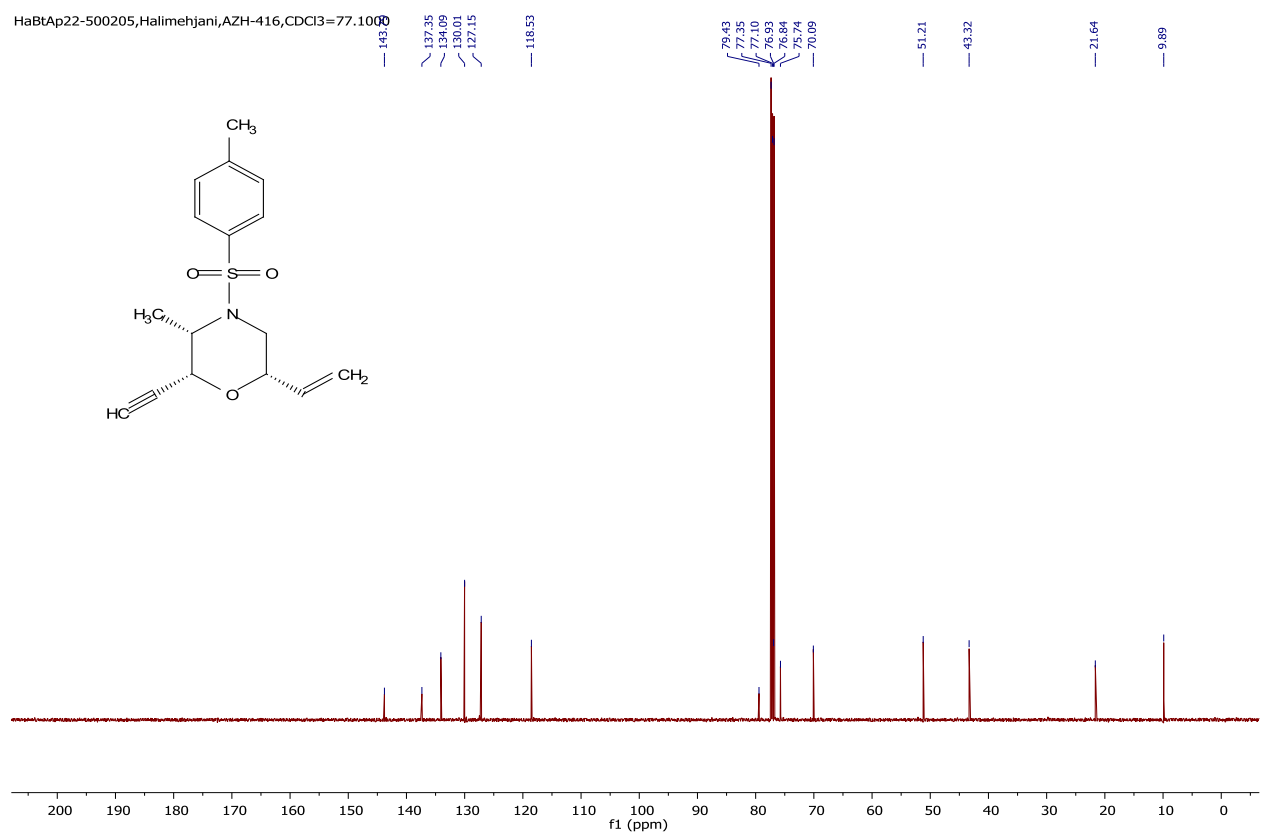

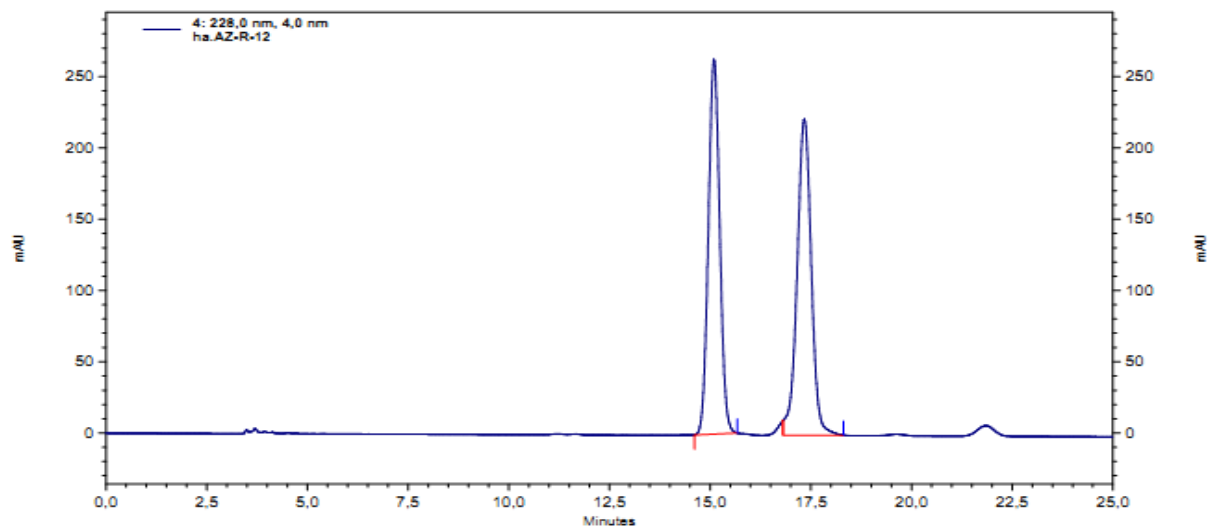

4: 228,0 nm, 4,0 nm

Results

| Peak Number | Retention Time | Area Percent | Area      |
|-------------|----------------|--------------|-----------|
| 1           | 15,093         | 48,719       | 691987432 |
| 2           | 17,337         | 51,281       | 728366542 |

|        |  |         |            |
|--------|--|---------|------------|
| Totals |  | 100,000 | 1420353974 |
|--------|--|---------|------------|

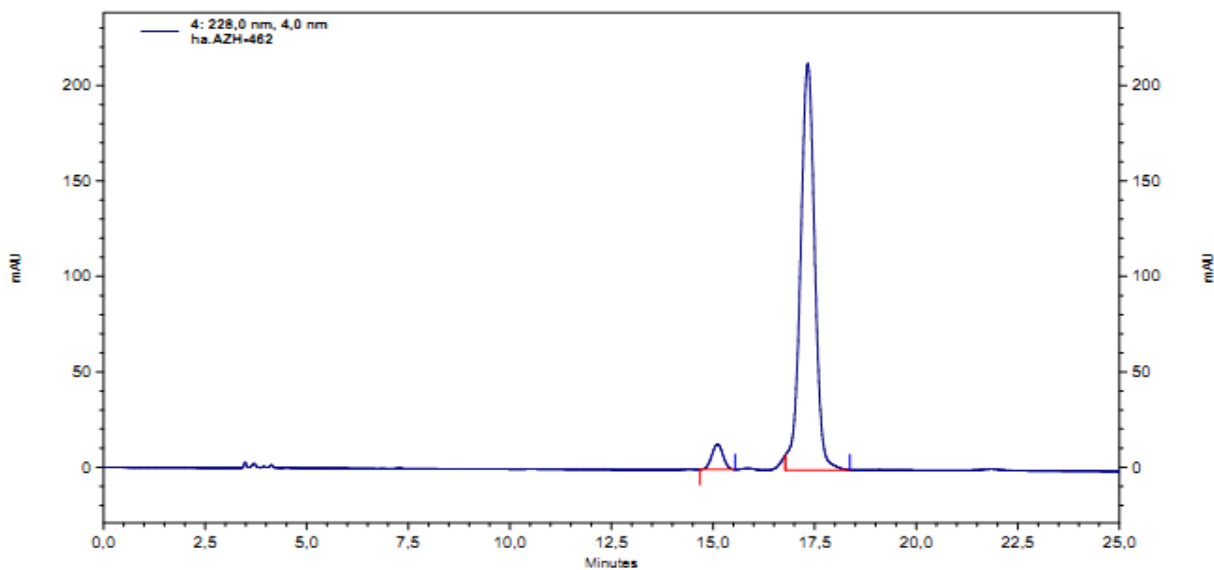

4: 228,0 nm, 4,0 nm

Results

| Peak Number | Retention Time | Area Percent | Area      |
|-------------|----------------|--------------|-----------|
| 1           | 15,107         | 4,729        | 34492020  |
| 2           | 17,328         | 95,271       | 694909296 |

|        |  |         |           |
|--------|--|---------|-----------|
| Totals |  | 100,000 | 729401316 |
|--------|--|---------|-----------|



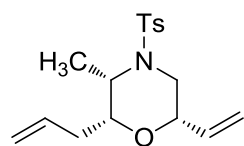

(2*R*,3*S*,6*S*)-2-allyl-3-methyl-4-tosyl-6-vinylmorpholine (**4e**):  $^1\text{H}$  NMR (500 MHz, Chloroform-*d*)  $\delta$  7.68 (d,  $J$  = 8.3 Hz, 2H), 7.33 – 7.28 (m, 2H), 5.83 – 5.67 (m, 2H), 5.33 (dt,  $J$  = 17.4, 1.5 Hz, 1H), 5.22 (dt,  $J$  = 10.7, 1.4 Hz, 1H), 5.17 – 5.03 (m, 2H), 3.98 – 3.86 (m, 2H), 3.64 – 3.54 (m, 2H), 2.80 (dd,  $J$  = 13.0, 11.0 Hz, 1H), 2.43 (s, 3H), 2.29–2.26 (m, 1H), 2.11 – 1.99 (m, 1H), 0.94 (d,  $J$  = 6.8 Hz, 3H) ppm;  $^{13}\text{C}$  NMR (126 MHz,  $\text{CDCl}_3$ )  $\delta$  143.5, 136.7, 134.3, 132.9, 129.9, 126.8, 118.7, 118.1, 77.9, 76.7, 50.2, 43.4, 36.4, 21.7, 8.3 ppm; HRMS (ESI) calcd for  $\text{C}_{17}\text{H}_{23}\text{NO}_3\text{S}$   $[\text{M}+\text{H}]^+$ : 322.1477; found: 322.1474; **HPLC** (ChiralPAK AD-3, heptane/EtOH = 85:15, 0.5 mL/min)  $t_R$  = 6.8 min (minor),  $t_R$  = 7.8 min (major), 87%;  $[\alpha]_D^{25}$  = 41.71 ( $c$  = 0.35,  $\text{CH}_2\text{Cl}_2$ ).

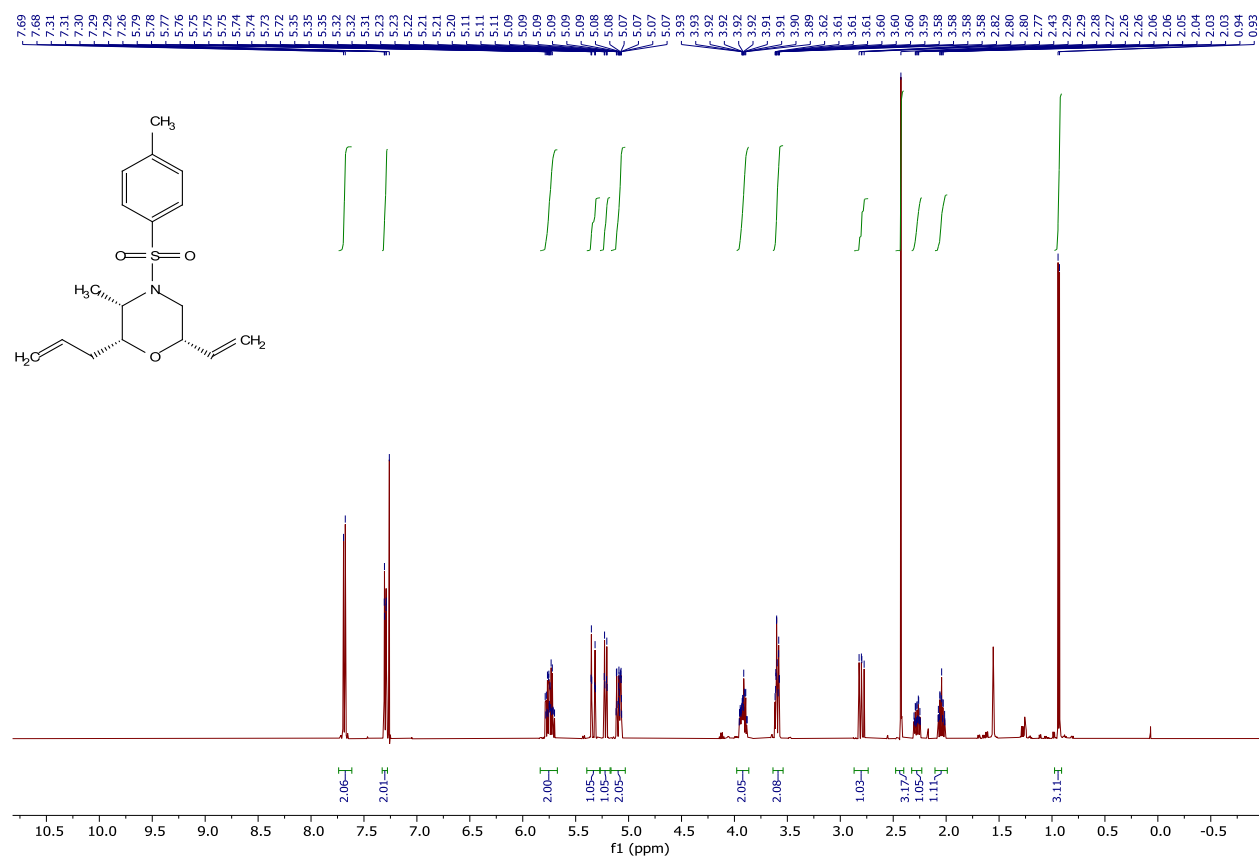

HaBtAp19-500617, HalimehJani, AZH-408, CDCl<sub>3</sub>=77.1000, 24.35

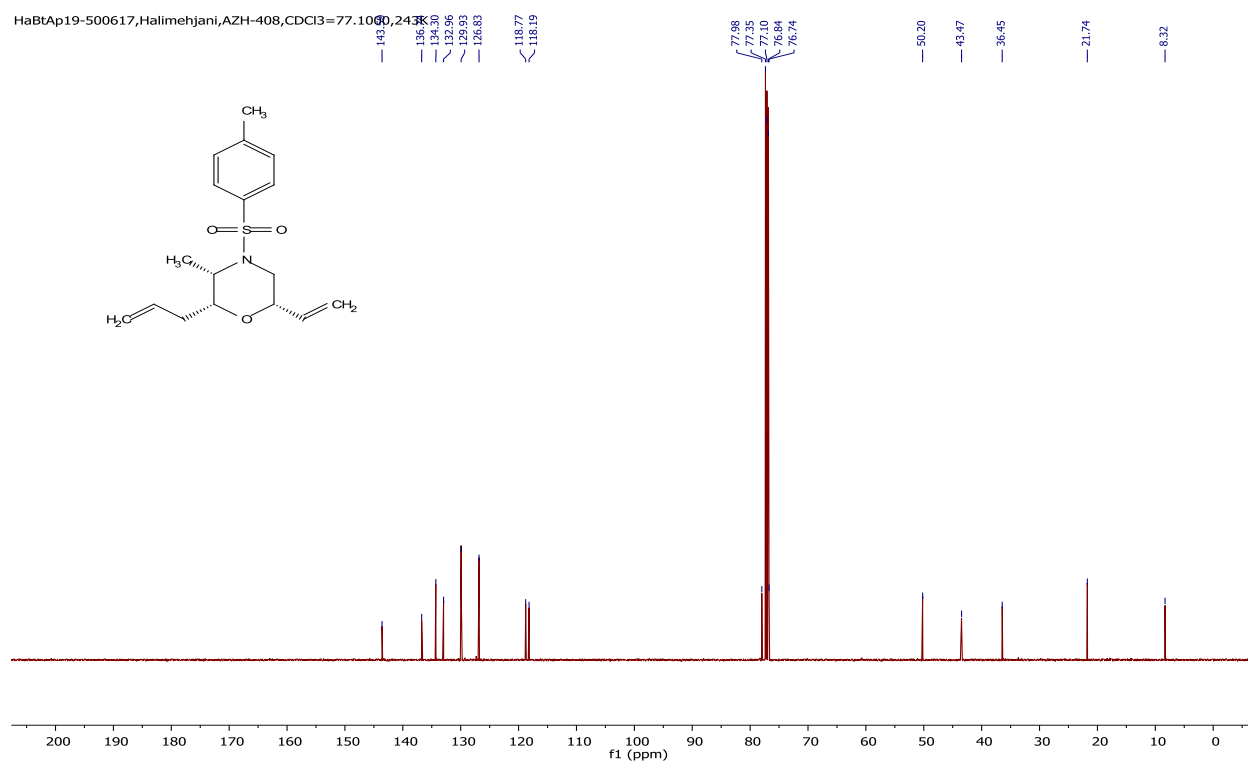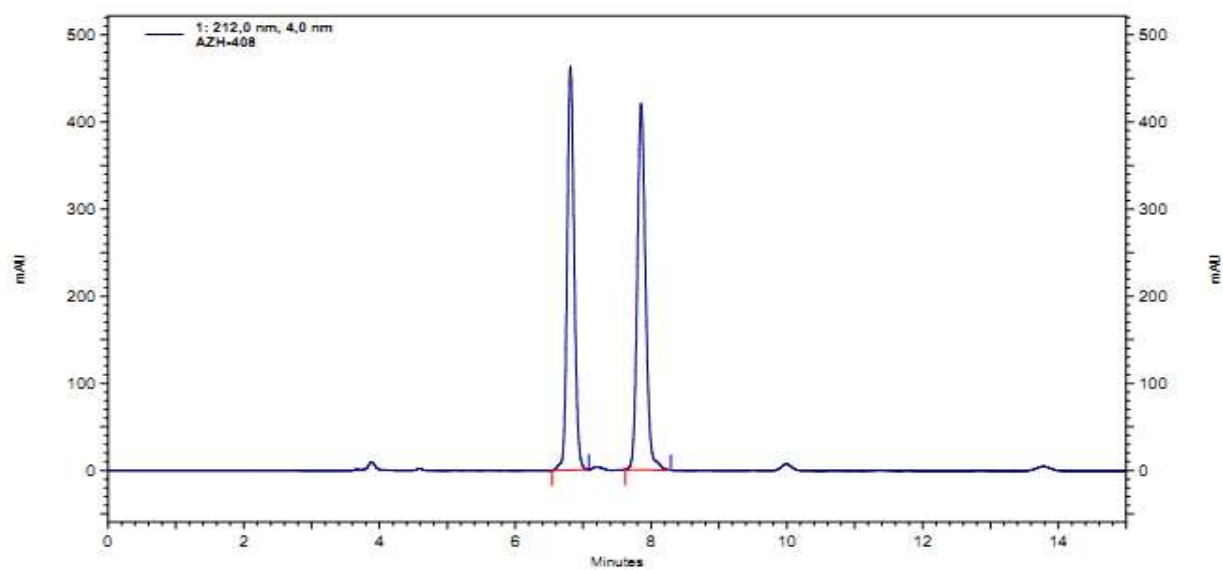

| 1: 212,0 nm, 4,0 nm<br>Results |                |              |           |  |
|--------------------------------|----------------|--------------|-----------|--|
| Peak Number                    | Retention Time | Area Percent | Area      |  |
| 1                              | 6,812          | 48,213       | 446505996 |  |
| 2                              | 7,853          | 51,787       | 479607490 |  |
| Totals                         |                | 100,000      | 926113486 |  |

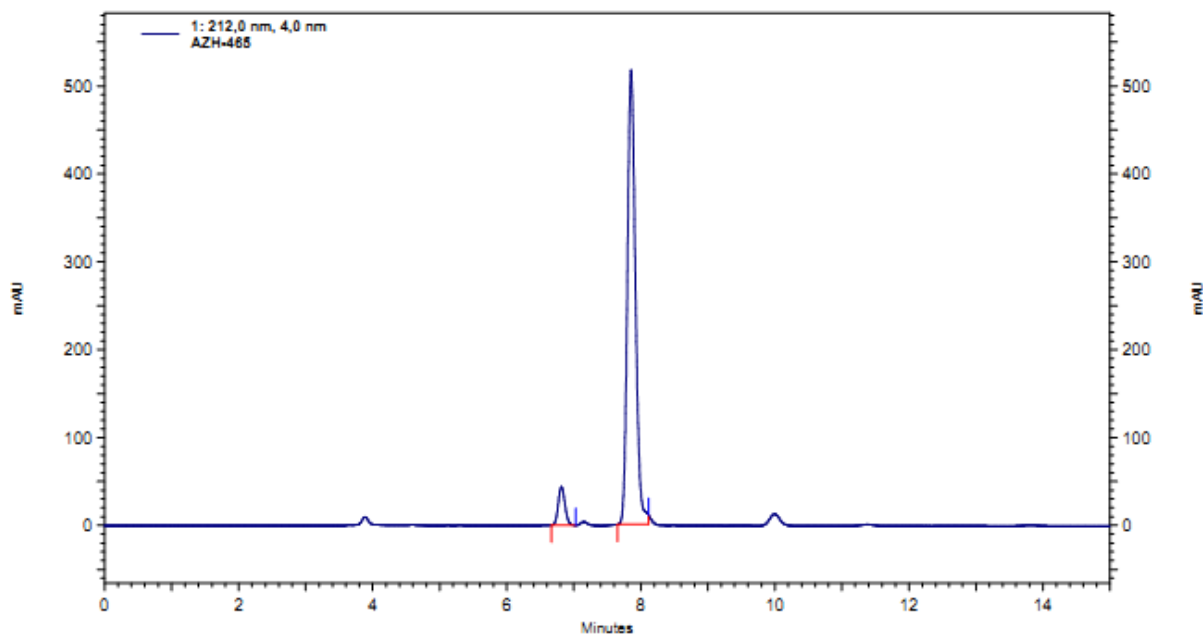

1: 212,0 nm, 4,0 nm

Results

| Peak Number | Retention Time | Area Percent | Area      |
|-------------|----------------|--------------|-----------|
| 1           | 6,815          | 6,598        | 40926775  |
| 2           | 7,855          | 93,402       | 579396913 |
| Totals      |                | 100,000      | 620323688 |

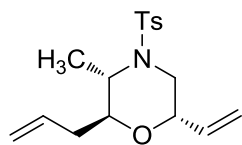

(2*S*,3*S*,6*S*)-2-allyl-3-methyl-4-tosyl-6-vinylmorpholine (**4f**): ppm;  $^1\text{H}$  NMR (500 MHz, Chloroform-*d*)  $\delta$  7.68 (d,  $J$  = 8.3 Hz, 2H), 7.34 – 7.29 (m, 2H), 5.92 – 5.60 (m, 2H), 5.49 – 4.94 (m, 4H), 4.24–4.20 (m, 1H), 3.88–3.84 (m, 1H), 3.68 – 3.40 (m, 2H), 2.80 (dd,  $J$  = 12.5, 11.0 Hz, 1H), 2.65 – 2.46 (m, 2H), 2.43 (s, 3H), 1.04 (d,  $J$  = 6.8 Hz, 3H) ppm;  $^{13}\text{C}$  NMR (126 MHz,  $\text{CDCl}_3$ )  $\delta$  143.4, 137.5, 135.2, 133.9, 129.8, 127.1, 118.0, 117.8, 77.0, 68.8, 49.4, 43.4, 34.6, 21.6, 14.3 ppm; HRMS (ESI) calcd for  $\text{C}_{17}\text{H}_{23}\text{NO}_3\text{S}$   $[\text{M}+\text{H}]^+$ : 322.1477; found: 322.1476; **HPLC** (ChiralPAK AD-3, heptane/Isopropanol = 90:10, 0.5 mL/min)  $t_R$  = 8.46 min (minor),  $t_R$  = 9.97 min (major), 88.5% ee;  $[\alpha]_D^{25}$  = 31.06 ( $c$  = 0.2125,  $\text{CH}_2\text{Cl}_2$ ).

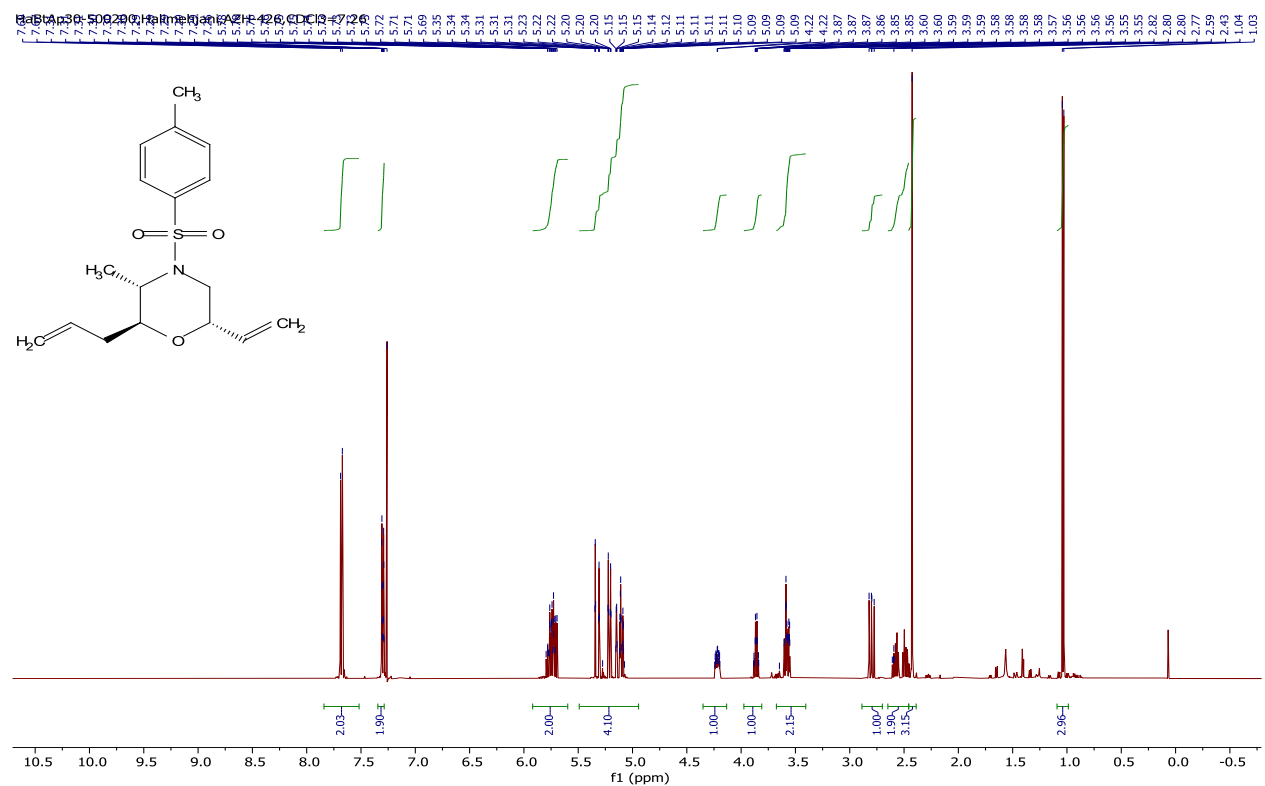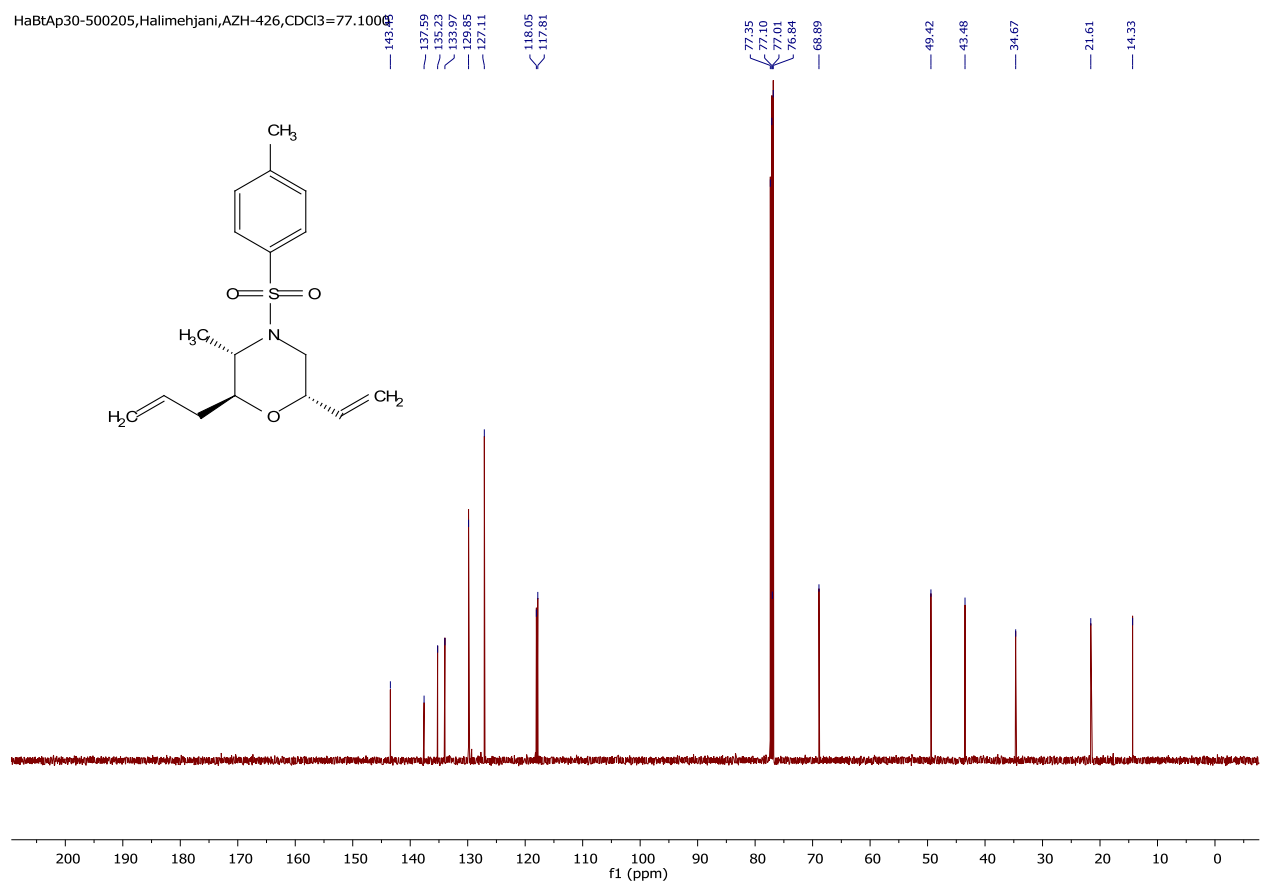

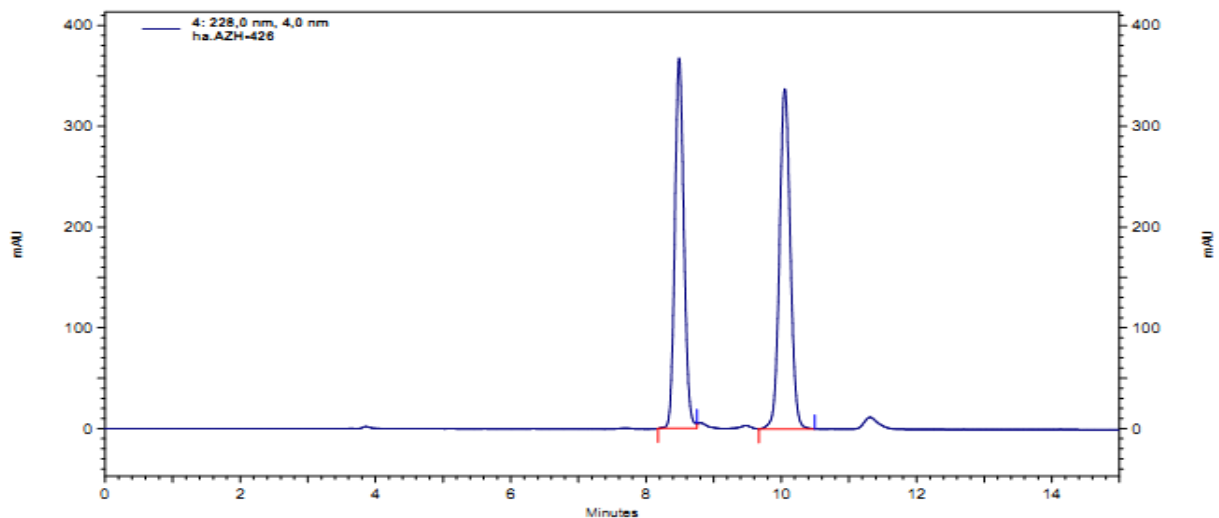

4: 228,0 nm, 4,0 nm

Results

| Peak Number | Retention Time | Area Percent | Area      |
|-------------|----------------|--------------|-----------|
| 1           | 8,487          | 47,805       | 461383618 |
| 2           | 10,053         | 52,195       | 503756321 |
| Totals      |                | 100,000      | 965139939 |

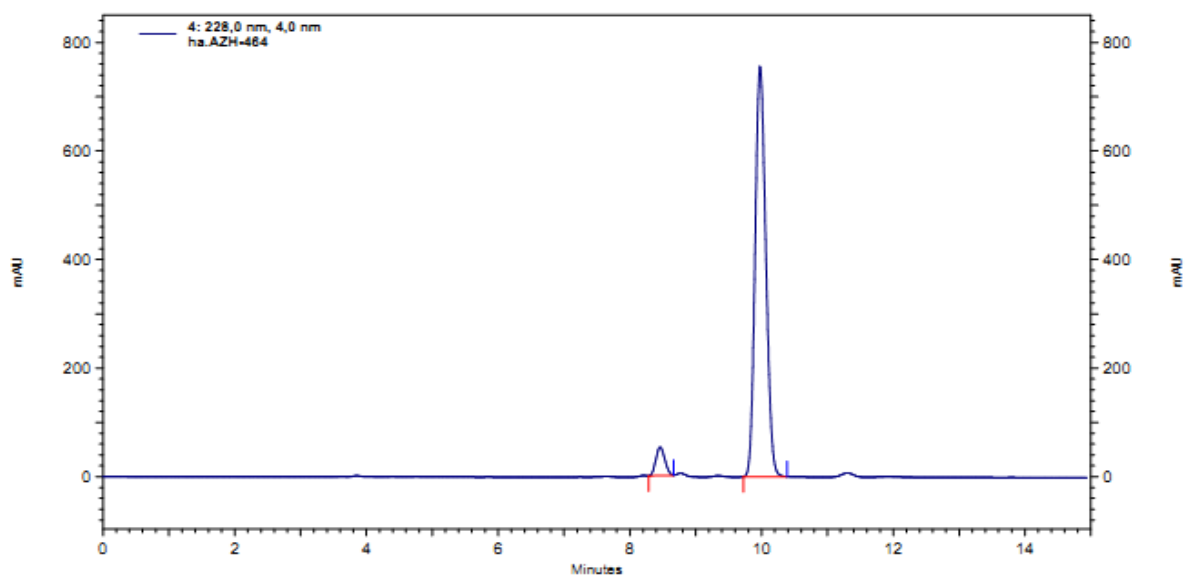

4: 228,0 nm, 4,0 nm

Results

| Peak Number | Retention Time | Area Percent | Area       |
|-------------|----------------|--------------|------------|
| 1           | 8,460          | 5,518        | 66625326   |
| 2           | 9,973          | 94,482       | 1140831020 |
| Totals      |                | 100,000      | 1207456346 |

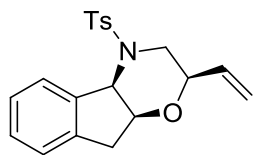

(2*R*,4*aR*,9*aS*)-4-tosyl-2-vinyl-2,3,4,4*a*,9,9*a*-hexahydroindeno[2,1-*b*][1,4]oxazine (**4g**):  $^1\text{H}$  NMR (500 MHz, Chloroform-*d*)  $\delta$  7.84 (d,  $J = 8.3$  Hz, 2H), 7.41 – 7.32 (m, 2H), 7.25 – 7.14 (m, 4H), 5.54 (ddd,  $J = 17.4, 10.7, 5.8$  Hz, 1H), 5.22 – 5.04 (m, 3H), 4.22 (t,  $J = 4.0$  Hz, 1H), 3.74 – 3.60 (m, 2H), 3.07 – 2.98 (m, 1H), 2.92 (d,  $J = 16.4$  Hz, 1H), 2.86 – 2.75 (m, 1H), 2.47 (s, 3H) ppm;  $^{13}\text{C}$  NMR (126 MHz,  $\text{CDCl}_3$ )  $\delta$  143.8, 140.4, 138.1, 138.0, 134.5, 130.1, 128.0, 127.0, 127.0, 125.4, 124.0, 118.0, 76.5, 73.9, 59.8, 44.7, 38.0, 21.7 ppm; HRMS (ESI) calcd for  $\text{C}_{20}\text{H}_{21}\text{NO}_3\text{S}$   $[\text{M}+\text{H}]^+$ : 356.1320; found: 356.1314; **HPLC** (ChiralPAK AD-3, heptane/EtOH = 85:15, 0.5 mL/min)  $t_R = 24.08$  min (minor),  $t_R = 31.13$  min (major), >99.9% ee;  $[\alpha]_{\text{D}}^{25} = -22.85$  ( $c = 0.7$ ,  $\text{CH}_2\text{Cl}_2$ ).

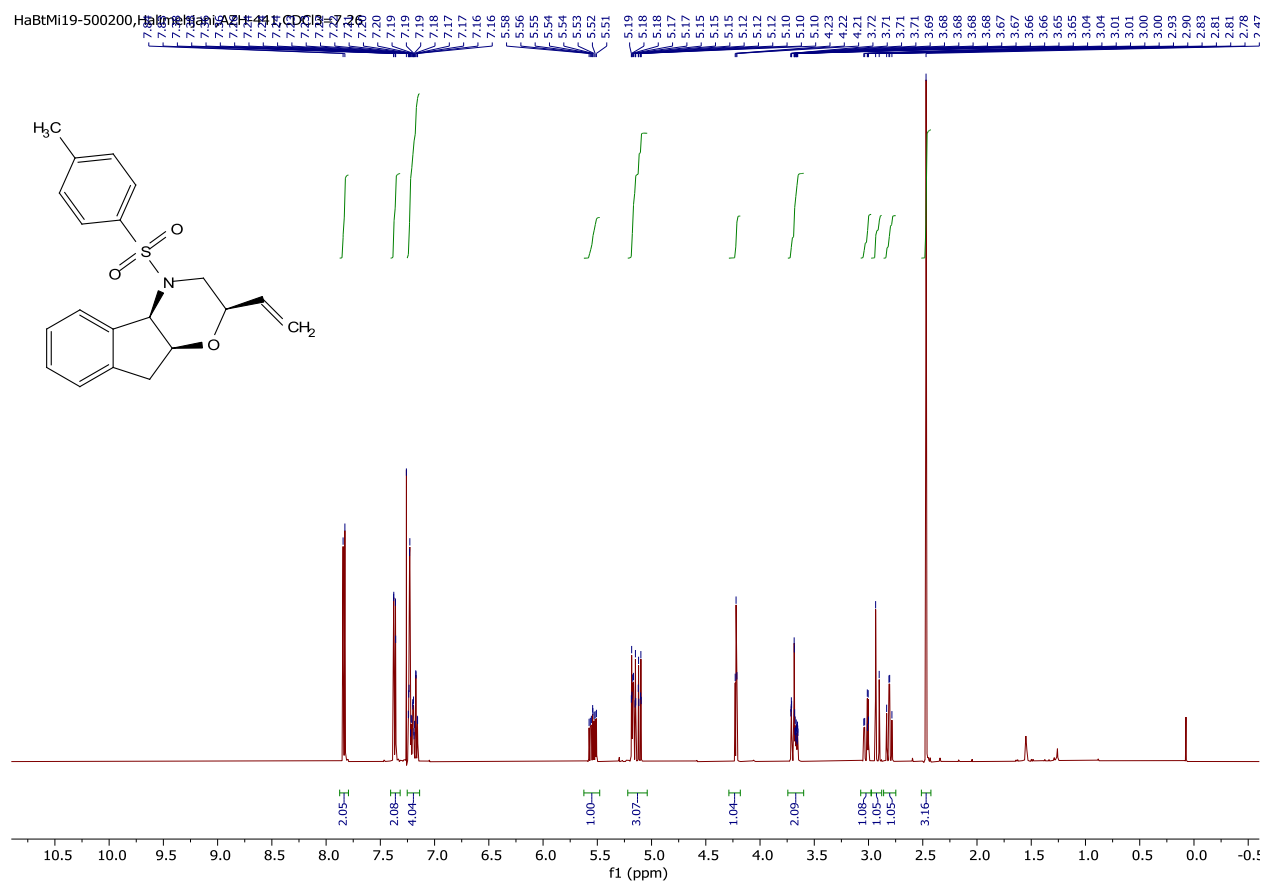

HaBtMi19-500209, Halimehjani, AZH-441, CDCl<sub>3</sub> = 77.10, 77.06, 76.84, 76.56, 73.95, 59.82, 44.78, 38.06, 21.71

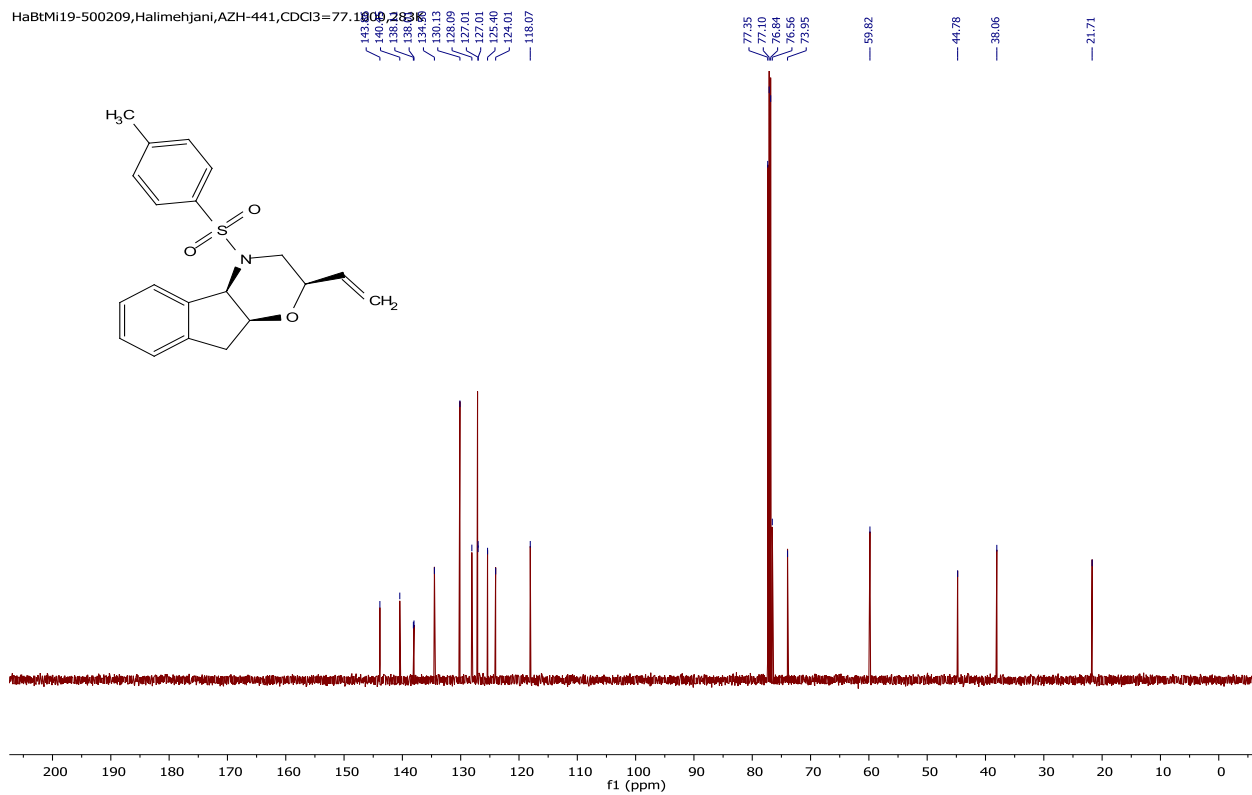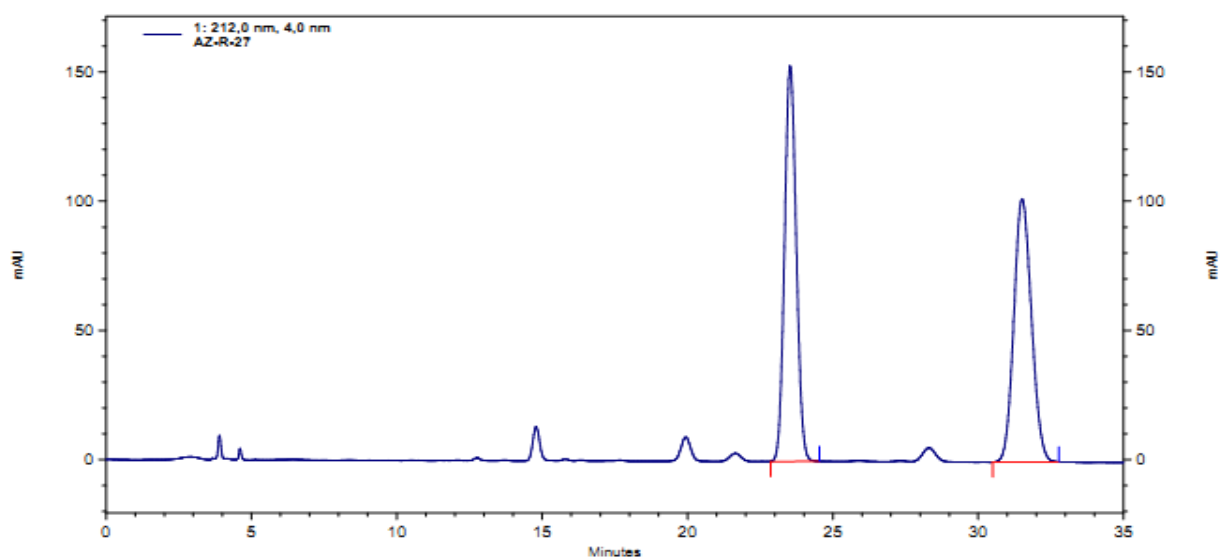

1: 212,0 nm, 4,0 nm

Results

| Peak Number | Retention Time | Area Percent | Area       |
|-------------|----------------|--------------|------------|
| 1           | 23,530         | 49,978       | 575211708  |
| 2           | 31,508         | 50,022       | 575716402  |
| Totals      |                | 100,000      | 1150928110 |

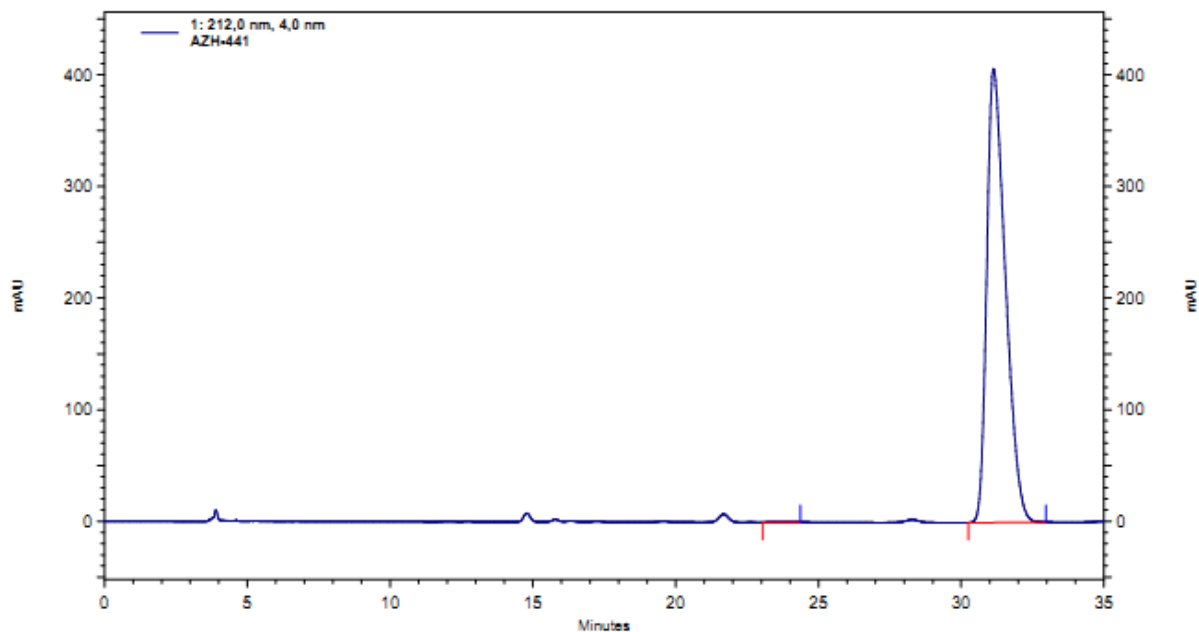

1: 212,0 nm, 4,0 nm  
Results

| Peak Number | Retention Time | Area Percent | Area       |
|-------------|----------------|--------------|------------|
| 1           | 24,085         | 0,041        | 1025933    |
| 2           | 31,133         | 99,959       | 2476899699 |
| Totals      |                | 100,000      | 2477925632 |

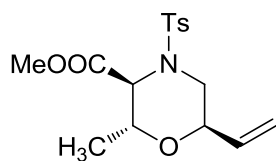

(2*R*,3*S*,6*R*)-methyl 2-methyl-4-tosyl-6-vinylmorpholine-3-carboxylate (**4h**):

$^1\text{H}$  NMR (500 MHz, Chloroform-*d*)  $\delta$  7.66 (d,  $J$  = 8.4 Hz, 2H), 7.33 – 7.28 (m, 2H), 5.68 (ddd,  $J$  = 17.3, 10.6, 5.9 Hz, 1H), 5.30 (dt,  $J$  = 17.4, 1.3 Hz, 1H), 5.20 (dt,  $J$  = 10.6, 1.2 Hz, 1H), 4.59–4.57 (m, 1H), 4.37 – 4.27 (m, 2H), 3.55 (s, 4H), 3.11 (dd,  $J$  = 12.6, 10.9 Hz, 1H), 2.42 (s, 3H), 1.48 (d,  $J$  = 6.7 Hz, 3H) ppm;  $^{13}\text{C}$  NMR (126 MHz,  $\text{CDCl}_3$ )  $\delta$  169.6, 143.5, 136.4, 134.9, 129.5, 127.3, 118.2, 70.2, 68.0, 58.2, 52.3, 45.6, 21.6, 16.8 ppm; HRMS (ESI) calcd for  $\text{C}_{16}\text{H}_{21}\text{NO}_5\text{S}$   $[\text{M}+\text{H}]^+$ : 340.1219; found: 340.1215; **HPLC** (ChiralPAK AD-3, Heptane/EtOH = 85:15, 0.5 mL/min)  $t_R$  = 11.7 min (major),  $t_R$  = 15.2 min (minor), >98% ee;  $[\alpha]_D^{25}$  = -87.5 ( $c$  = 0.45,  $\text{CH}_2\text{Cl}_2$ ).



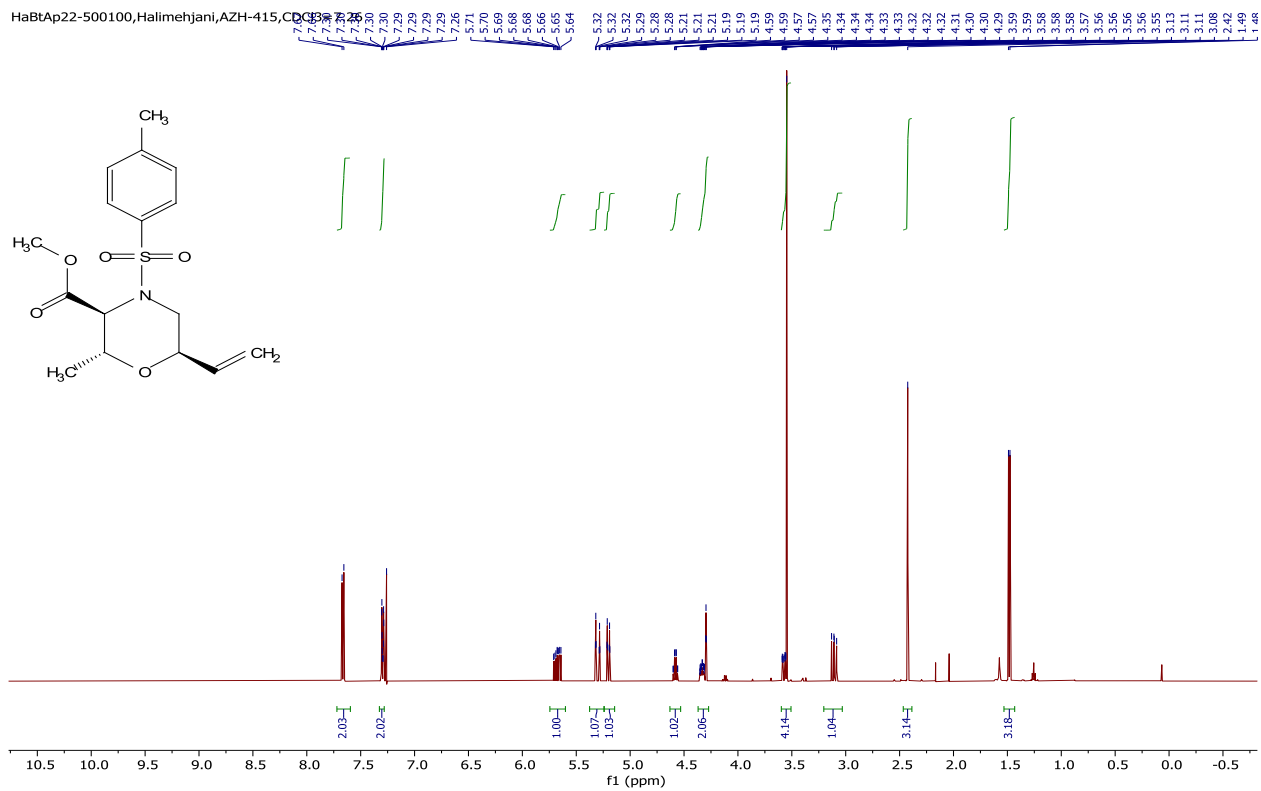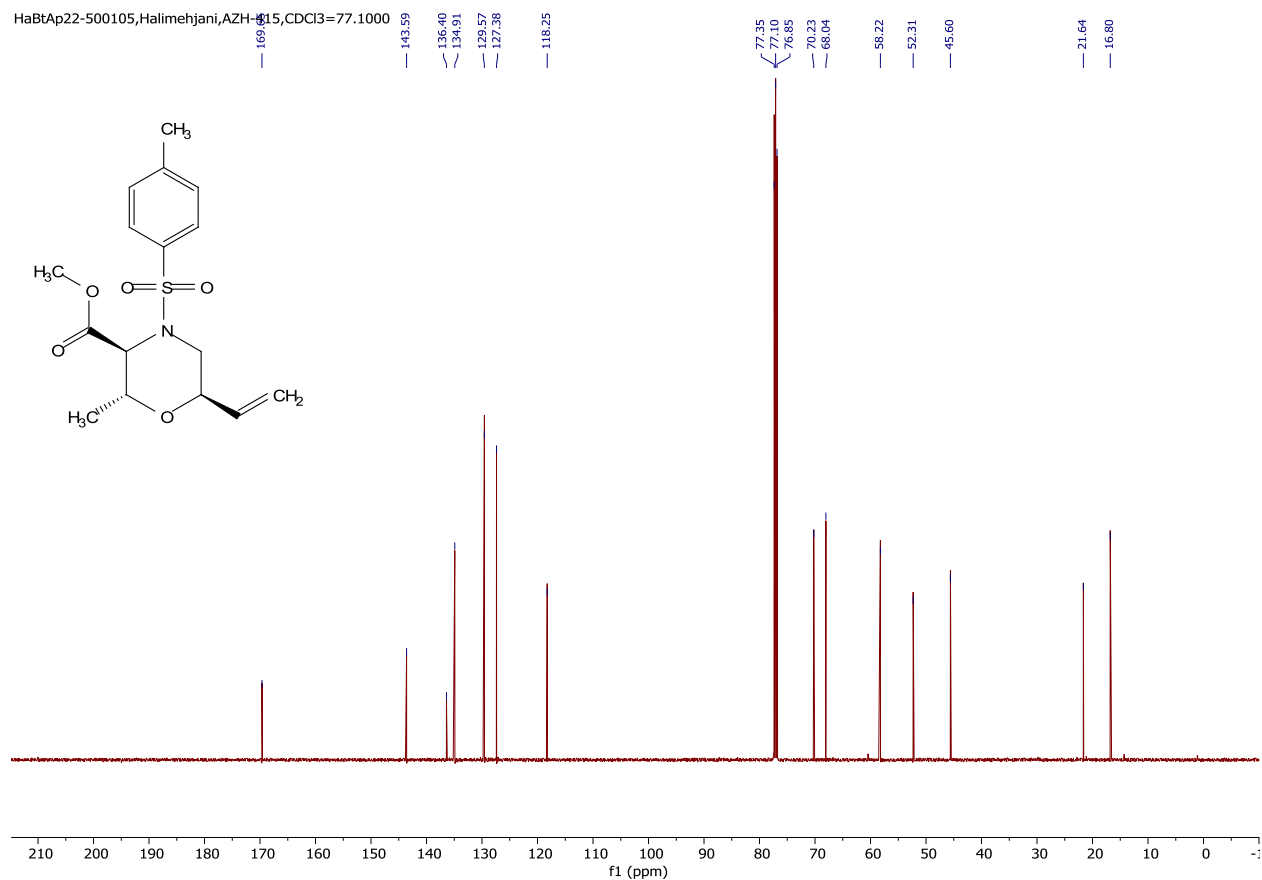

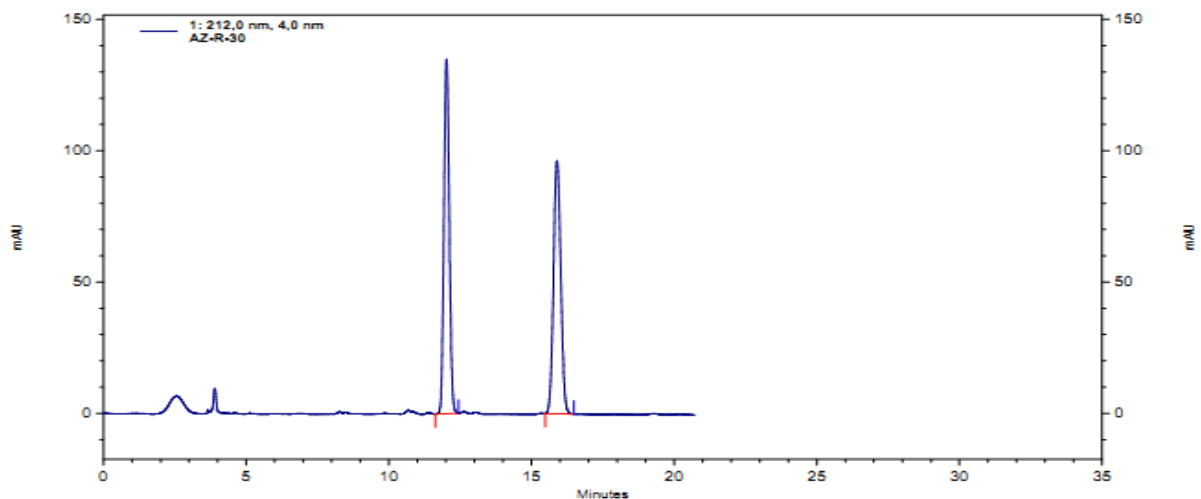

1: 212,0 nm, 4,0 nm

Results

| Peak Number | Retention Time | Area Percent | Area      |
|-------------|----------------|--------------|-----------|
| 1           | 12,022         | 50,529       | 233604385 |
| 2           | 15,895         | 49,471       | 228711137 |

|        |  |         |           |
|--------|--|---------|-----------|
| Totals |  | 100,000 | 462315522 |
|--------|--|---------|-----------|

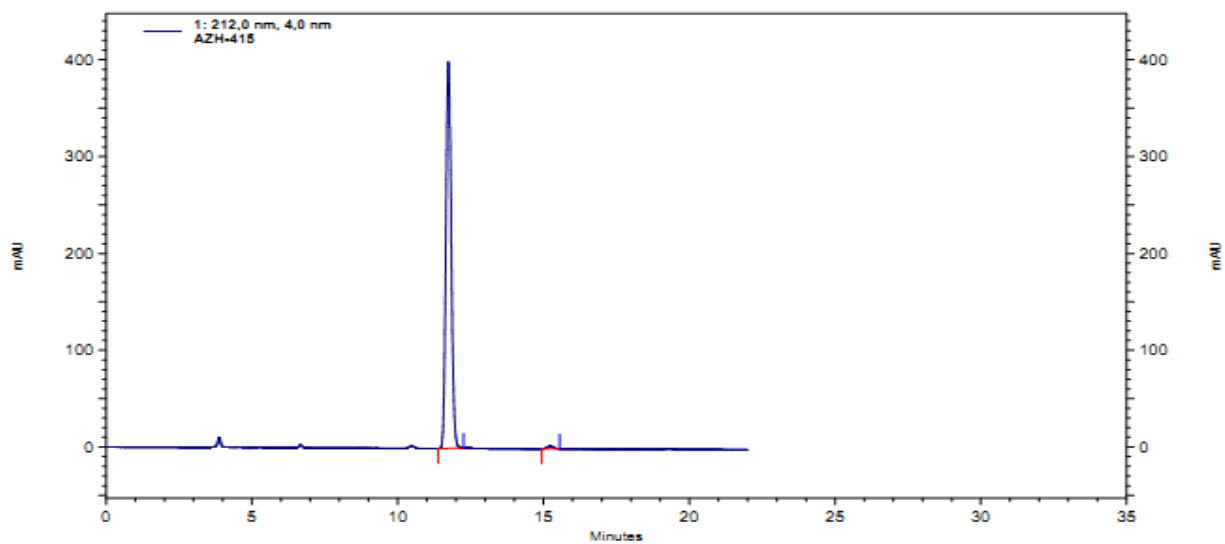

1: 212,0 nm, 4,0 nm

Results

| Peak Number | Retention Time | Area Percent | Area      |
|-------------|----------------|--------------|-----------|
| 1           | 11,737         | 99,091       | 679602610 |
| 2           | 15,225         | 0,909        | 6237056   |

|        |  |         |           |
|--------|--|---------|-----------|
| Totals |  | 100,000 | 685839666 |
|--------|--|---------|-----------|

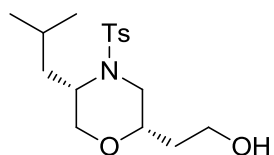

**Synthesis of 2-((2S,5S)-5-isobutyl-4-tosylmorpholin-2-yl)ethanol (5):** To a stirred solution of (2S,5S)-5-isobutyl-4-tosyl-2-vinylmorpholine (**2d**) (80 mg, 0.25 mmol, 1.00 eq) in THF (0.5 mL, 0.5 M) was added 9-BBN (0.55 mL, 0.275 mmol, 0.5 M, 1.1 eq) dropwise at 0 °C. The reaction mixture was stirred at rt for 3 h until aqueous NaOH (1.1 mL, 2M) and aqueous H<sub>2</sub>O<sub>2</sub> (30 w-%, 0.37 mL) were added at rt. The mixture was stirred for 50 min and quenched by the addition of aqueous Na<sub>2</sub>S<sub>2</sub>O<sub>3</sub> (sat., 5.0 mL). The resulting mixture was diluted with CH<sub>2</sub>Cl<sub>2</sub> (20 mL) and washed with H<sub>2</sub>O (10 mL) and brine (10 mL). The organic layer was dried over Na<sub>2</sub>SO<sub>4</sub> and the solvent was evaporated under reduced pressure. The residue was purified by flash chromatography (SiO<sub>2</sub>, *n*-pentane:AcOEt = 7:3) to afford the title compound **5** in 90% isolated yield. <sup>1</sup>H NMR (500 MHz, Chloroform-*d*) δ 7.69 (d, *J* = 8.3 Hz, 2H), 7.35 – 7.27 (m, 2H), 3.88 – 3.62 (m, 4H), 3.62 – 3.42 (m, 3H), 2.92 (dd, *J* = 13.6, 11.0 Hz, 1H), 2.43 (s, 3H), 2.15 (s, 1H), 1.74 – 1.61 (m, 2H), 1.58 – 1.45 (m, 3H), 0.88 (d, *J* = 6.3, 6H) ppm; <sup>13</sup>C NMR (126 MHz, CDCl<sub>3</sub>) δ 143.5, 138.0, 129.8, 127.2, 74.9, 68.9, 60.3, 51.1, 45.1, 36.9, 35.1, 24.9, 22.7, 22.4, 21.6 ppm; HRMS (ESI) calcd for C<sub>17</sub>H<sub>27</sub>NO<sub>4</sub>S [M+H]<sup>+</sup>: 342.1739; found: 342.1732. [α]<sub>D</sub><sup>25</sup> = +56.0 (c = 0.0875, CH<sub>2</sub>Cl<sub>2</sub>).

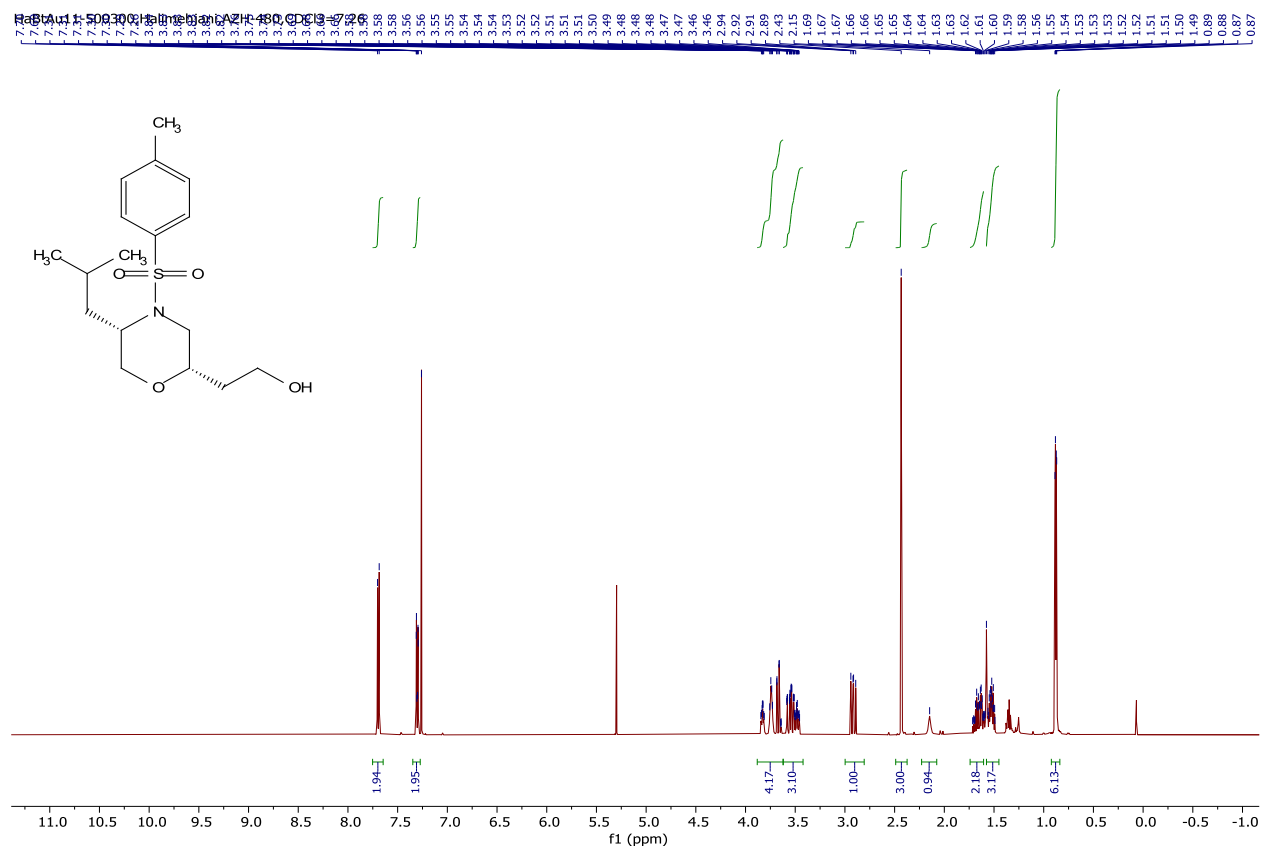

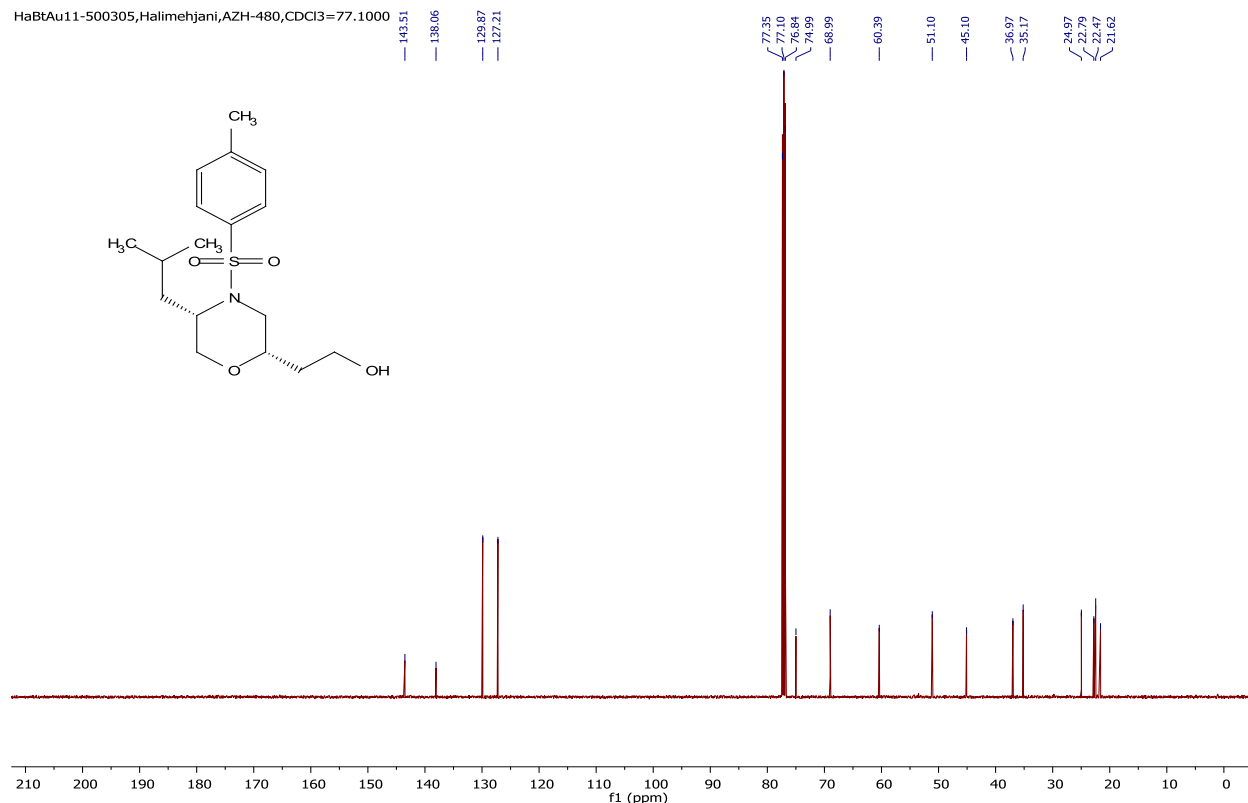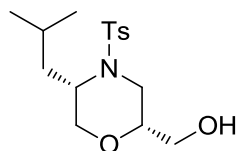

### Synthesis of ((2*R*,5*S*)-5-isobutyl-4-tosylmorpholin-2-yl)methanol (6):

A solution of (2*S*,5*S*)-5-isobutyl-4-tosyl-2-vinylmorpholine **2d** (90 mg, 0.28 mmol, 1.0 equiv.) in CH<sub>2</sub>Cl<sub>2</sub> (5 mL) was cooled to −78 °C. Ozone was bubbled through the solution until the solution showed a blue color (approx. 15 min). Then, the reaction vessel was degassed with nitrogen until disappearance of the blue color occurred. Me<sub>2</sub>S (50 μL) was added and the reaction mixture was allowed to warm to room temperature. The solution was concentrated under reduced pressure to give a crude product. The crude mixture was dissolved in methanol (5 mL) and NaBH<sub>4</sub> (1 mmol) was added and the mixture was stirred at room temperature for 5 h. Evaporation of the solvent and chromatography on silica gel (EtOAc:*n*-pentane; 2:8) afforded the pure product in 95% isolated yield. <sup>1</sup>H NMR (500 MHz, Chloroform-*d*) δ 7.69 (d, *J* = 8.4 Hz, 2H), 7.34 – 7.26 (m, 2H), 3.87–3.82 (m, 1H), 3.70 (dd, *J* = 11.6, 0.9 Hz, 1H), 3.67 – 3.47 (m, 4H), 3.39–3.36 (m, 1H), 3.03 (dd, *J* = 13.6, 11.2 Hz, 1H), 2.43 (s, 3H), 1.86 (brs, 1H), 1.60 – 1.45 (m, 2H), 1.38 – 1.29 (m, 1H), 0.88 (d, *J* = 6.4 Hz, 6H) ppm; <sup>13</sup>C NMR (126 MHz, CDCl<sub>3</sub>) δ 143.5, 137.9, 129.9, 127.2, 75.0, 68.8, 63.5, 51.1, 41.6, 36.9, 24.9, 22.7, 22.4, 21.6 ppm; HRMS (ESI) calcd for C<sub>16</sub>H<sub>25</sub>NO<sub>4</sub>S [M+Na]<sup>+</sup>: 350.1402; found: 350.1396; [α]<sub>D</sub><sup>25</sup> = +24.71 (c = 0.392, CH<sub>2</sub>Cl<sub>2</sub>).

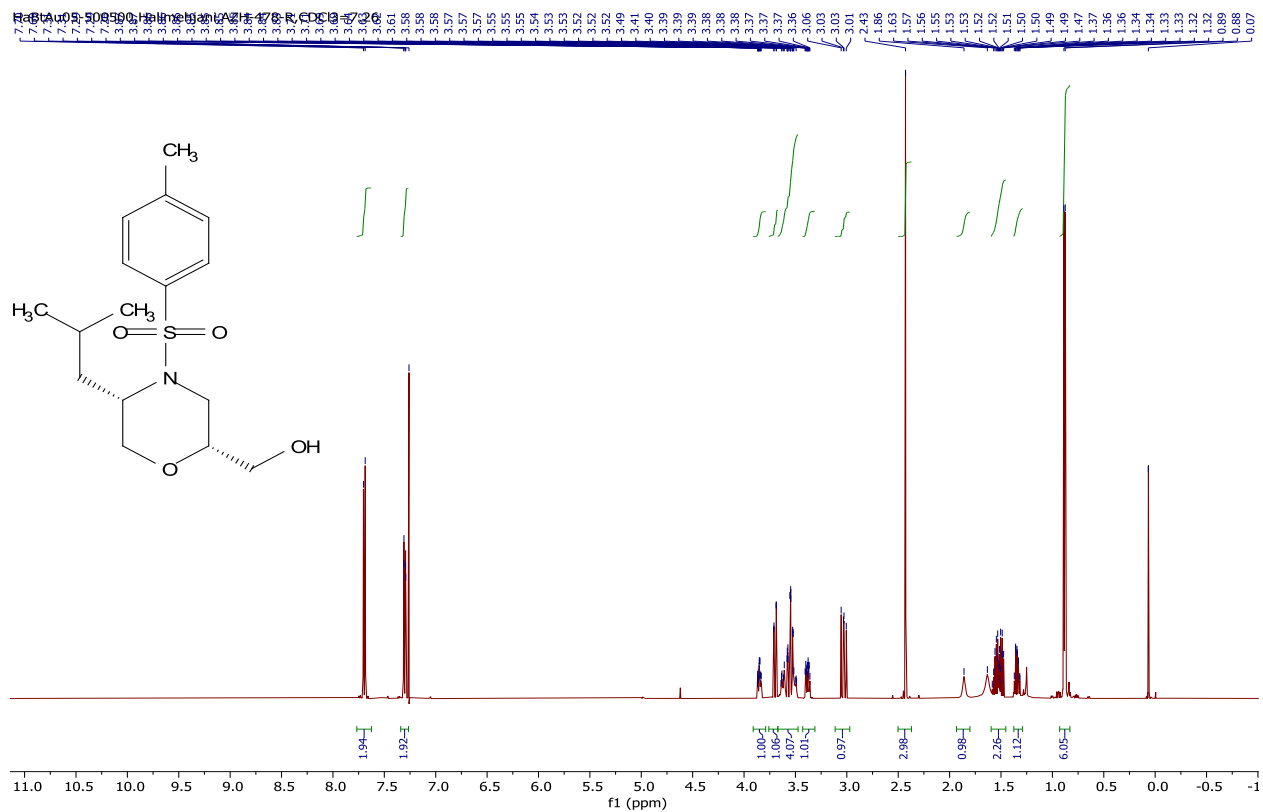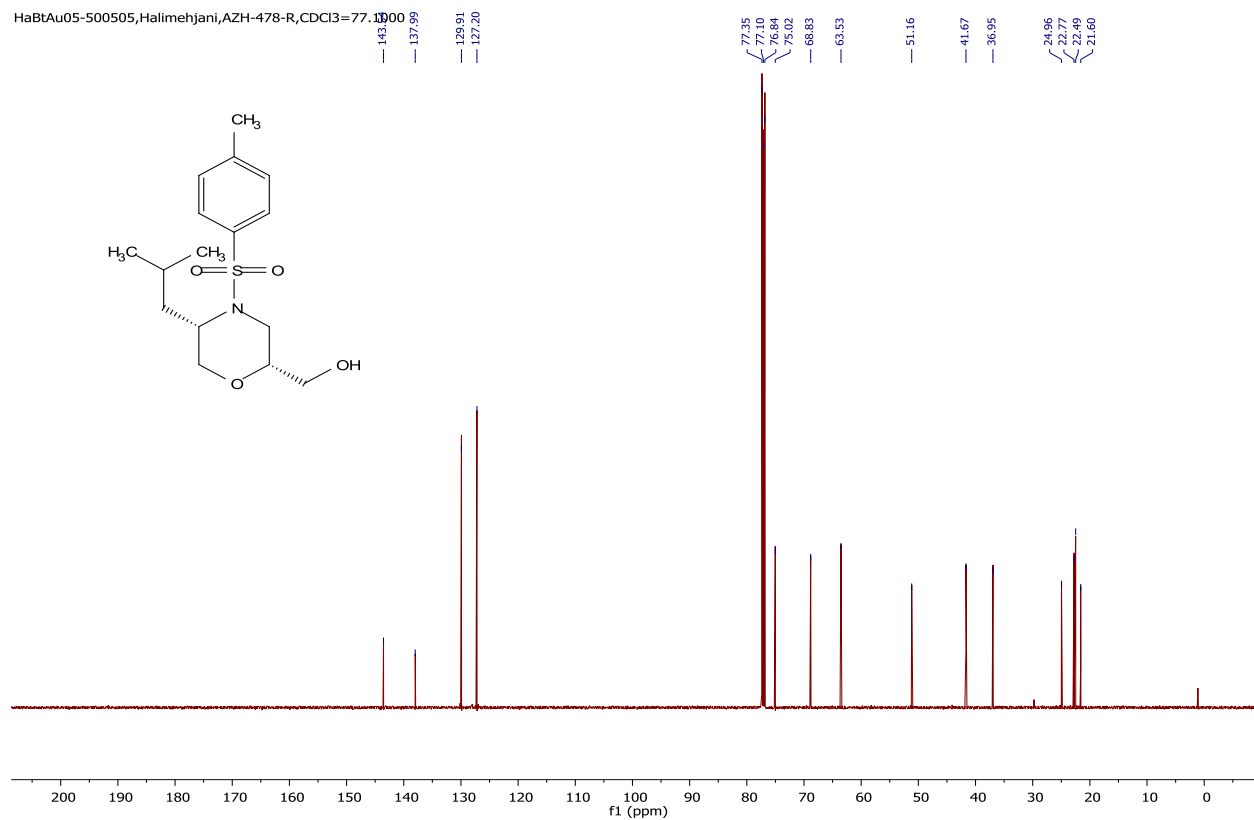

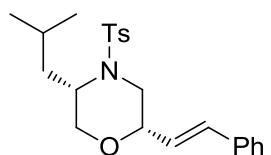

**Synthesis of (2*S*,5*S*)-5-isobutyl-2-((*E*)-styryl)-4-tosylmorpholine (7):** A mixture of (2*S*,5*S*)-5-isobutyl-4-tosyl-2-vinylmorpholine (**2d**) (80 mg, 0.25 mmol, 1.00 eq), trans-stilbene (450 mg, 10 mmol, 10.0 eq) and Hoveyda-Grubbs II (15.6 mg, 10.0 mol%) in DCE (1.25 mL, 0.2 M) were refluxed at 80 °C for 18 h. The reaction mixture was concentrated under reduced pressure and the crude product was purified by flash column chromatography (SiO<sub>2</sub>, petroleum ether:AcOEt = 20:1 to 15:1). The title product **7** was obtained as a colourless oil in 80% isolated yield. <sup>1</sup>H NMR (500 MHz, Chloroform-*d*) δ 7.73 (d, *J* = 8.3 Hz, 2H), 7.39 – 7.25 (m, 7H), 6.63 (dd, *J* = 16.2, 1.2 Hz, 1H), 6.06 (dd, *J* = 16.1, 6.0 Hz, 1H), 4.01 – 3.81 (m, 2H), 3.81 – 3.55 (m, 3H), 3.00 (dd, *J* = 13.7, 11.0 Hz, 1H), 2.44 (s, 3H), 1.63 – 1.56 (m, 2H), 1.39–1.37 (m, 1H), 0.90 (d, *J* = 6.3 Hz, 6H) ppm; <sup>13</sup>C NMR (126 MHz, CDCl<sub>3</sub>) δ 143.5, 138.1, 136.2, 132.7, 129.9, 128.6, 128.1, 127.2, 126.6, 125.8, 75.6, 68.8, 50.9, 45.1, 36.9, 24.9, 22.7, 22.5, 21.6 ppm; HRMS (ESI) calcd for C<sub>23</sub>H<sub>29</sub>NO<sub>3</sub>S [M+H]<sup>+</sup>: 400.1946; found: 400.1945; [α]<sub>D</sub><sup>25</sup> = -26.5 (c = 0.608, CH<sub>2</sub>Cl<sub>2</sub>).

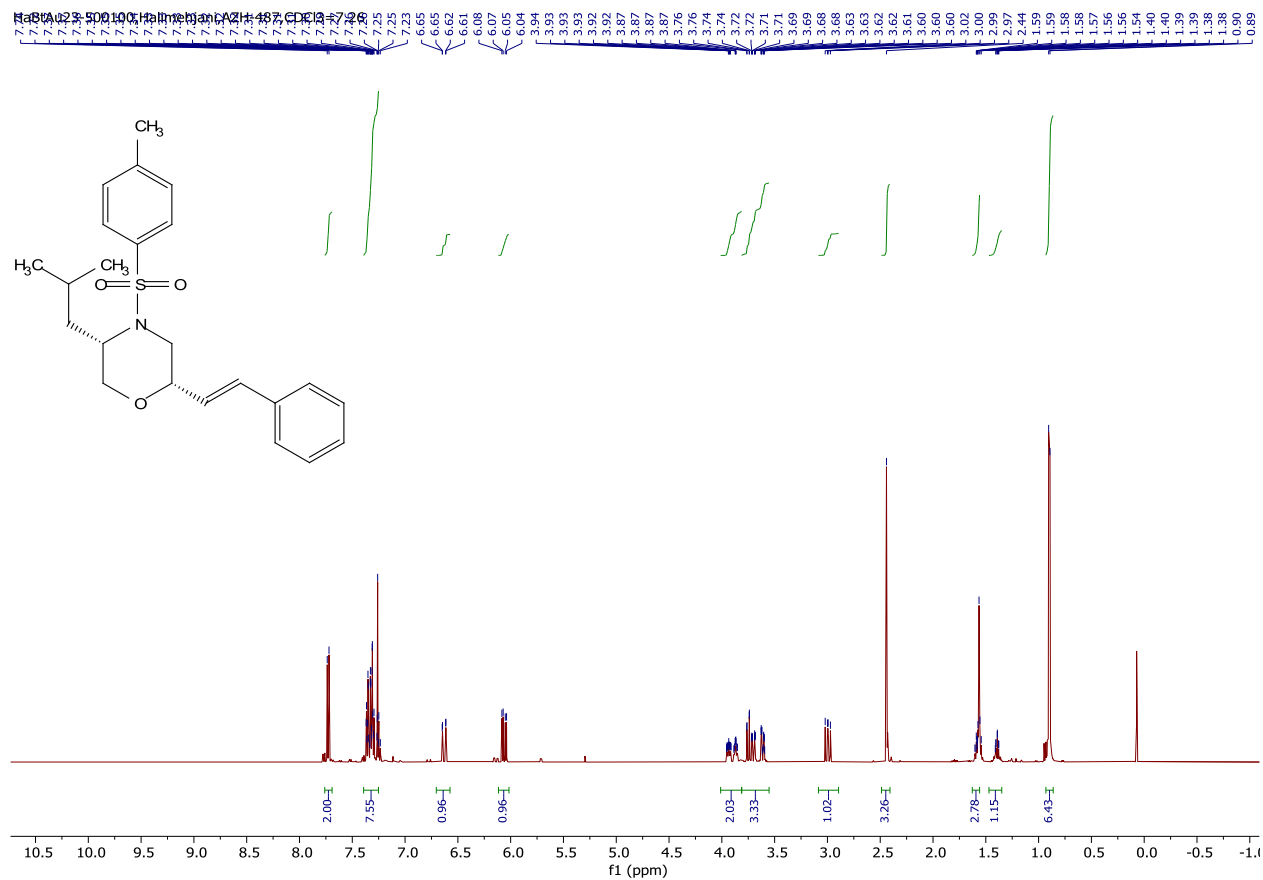

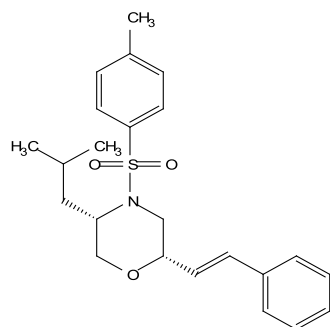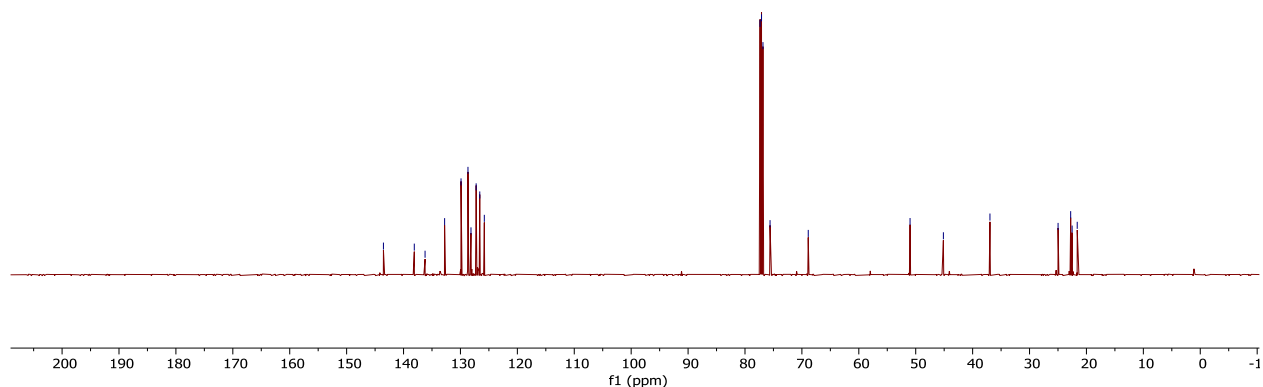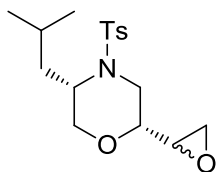

#### Synthesis of (2R,5S)-5-isobutyl-2-(oxiran-2-yl)-4-tosylmorpholine (8):

(2S,5S)-5-isobutyl-4-tosyl-2-vinylmorpholine (**2d**) (80 mg, 0.25 mmol) was dissolved in DCE (0.5 ml). To this solution *m*-CPBA (115 mg, 0.5 mmol, 75%, 2.0 eq.) was added and the mixture was refluxed for 16 h. Afterwards the reaction was cooled to 0 °C and quenched with saturated Na<sub>2</sub>SO<sub>3</sub> (5 ml) and NaHCO<sub>3</sub> (6 ml, 10 %). The aqueous layer was extracted with dichlormethane (3 x 10 ml) and the combined organic layers were dried over Na<sub>2</sub>SO<sub>4</sub> and evaporated. The resulting crude product was purified by flash column chromatography on silica gel (*n*-pentane / EtOAc = 8:2) to afford the product as a colourless oil (90% isolated yield for both diastereomeres, *dr* ratio was determined to be 6:4 by crude <sup>1</sup>H NMR analysis). <sup>1</sup>H NMR (500 MHz, Chloroform-*d*) δ 7.69 (d, *J* = 8.3 Hz, 2H), 7.34 – 7.28 (m, 2H), 3.94 – 3.77 (m, 1H), 3.74 – 3.44 (m, 3H), 3.23–3.19 (m, 1H), 3.05 (ddd, *J* = 26.9, 13.5, 11.3 Hz, 1H), 2.97 – 2.84 (m, 1H), 2.76 (ddd, *J* = 5.4, 4.1, 1.5 Hz, 1H), 2.69–2.66 (m, 1H), 2.43 (s, 3H), 1.56 – 1.45 (m, 2H), 1.41 – 1.30 (m, 1H), 0.92 – 0.84 (m, 6H) ppm; <sup>13</sup>C NMR (126 MHz, CDCl<sub>3</sub>) δ 143.6 and 143.6, 137.9 and 137.8, 129.9 and 129.9, 127.2 and 127.1, 74.7 and 74.1,

68.8 and 68.7, 51.6 and 51.5, 51.1 and 51.1, 44.6 and 43.5, 42.0 and 41.9, 36.8 (2C), 24.9 (2C), 22.8 and 22.7, 22.4 (2C), 21.6 (2C) ppm; HRMS (ESI) calcd for  $C_{17}H_{25}NO_4S$   $[M+H]^+$ : 340.1583; found: 340.1580.

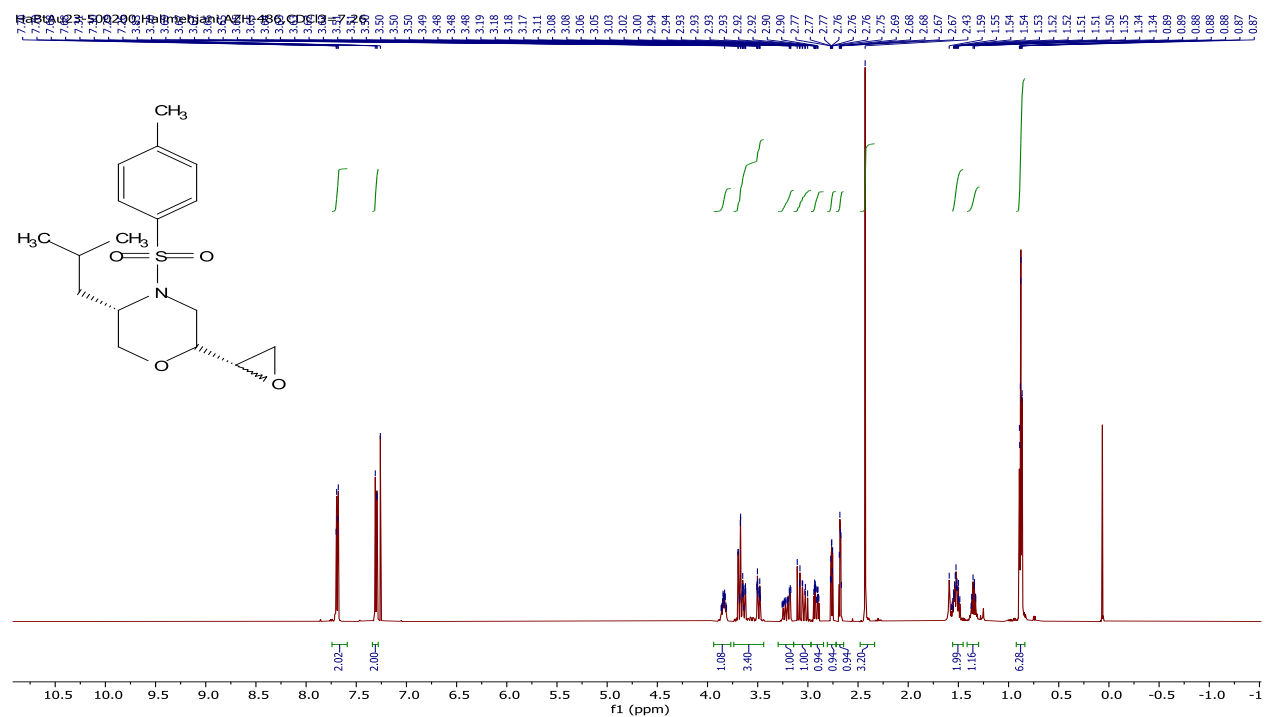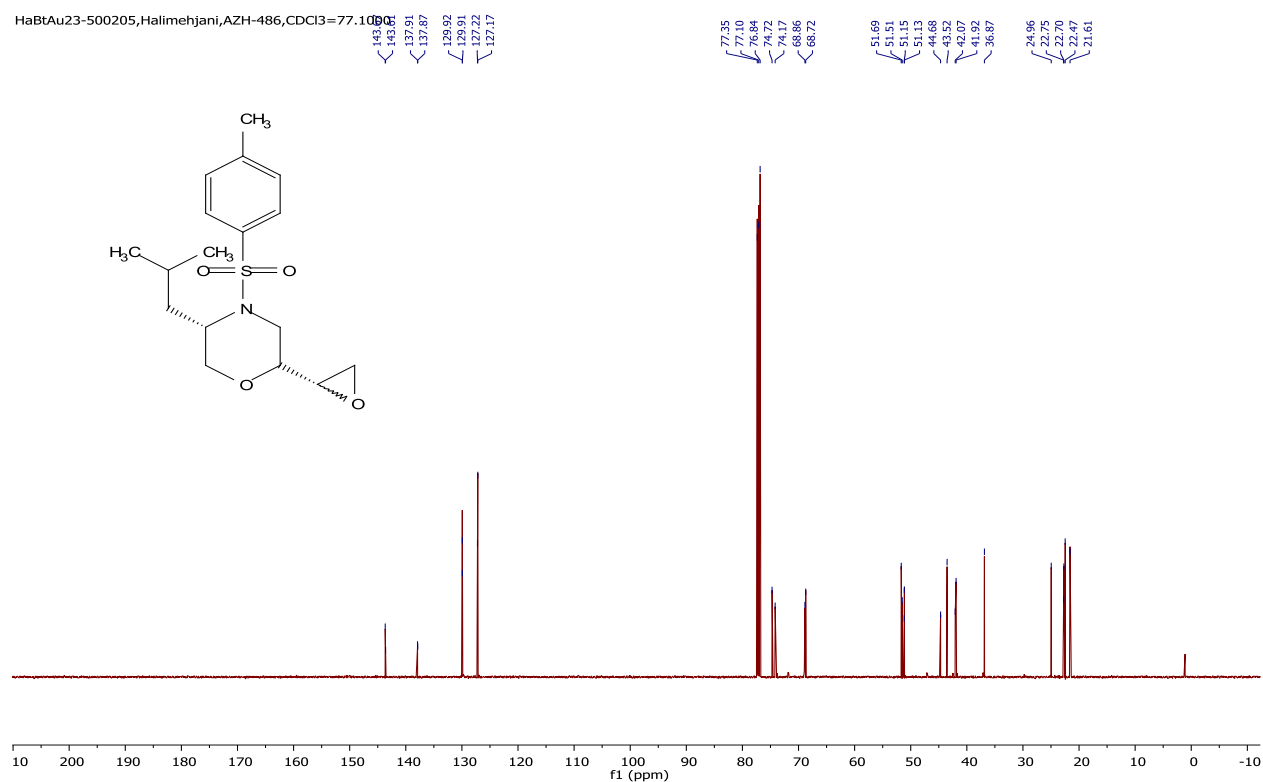



## References

1. S. Wuennemann, R. Froehlich and D. Hoppe, *Eur. J. Org. Chem.* 2008, 684-692.
2. Z. Yu, L. Liu, and J. Zhang, *Chem. Eur. J.* 2016, **22**, 8488-8492.
3. Y.-L. Ban, J.-L. Dai, X.-L. Jin, Q.-B. Zhang and Q. Liu, *Chem. Commun.*, 2019, **55**, 9701-9704.
4. M. Inman and C. J. Moody, *Eur. J. Org. Chem.* 2013, 2179-2187.
5. H. Nakamura, T. Yoshida, C. Tsukano and Y. Takemoto, *Org. Lett.* 2016, **18**, 2300–2303.
6. H. Ohno, H. Hamaguchi, M. Ohata, S. Kosaka and T. Tanaka, *J. Am. Chem. Soc.* 2004, **126**, 8744–8754.
7. K. J. Hale, M. Grabski, S. Manaviazar and M. Maczka, *Org. Lett.* 2014, **16**, 1164–1167.
8. E. Tayama, S. Sugai, *Tetrahedron Lett.*, 2007, **48**, 6163-6166.
9. A. G. Myers, B. Zhong, M. Movassaghi, D. W. Kung, B. A. Lanman and S. Kwon, *Tetrahedron Lett.*, 2000, **41**, 1359–1362.
10. V. Gobé, X. Guinchard, *Chem. Eur. J.* 2015, **21**, 8511-8520.
11. K. Thai, L. Wang, T. Dudding, F. Bilodeau and M. Gravel, *Org. Lett.* 2010, **12**, 5708–5711. <https://doi.org/10.1021/ol102536s>)
12. J. K. Vandavasi, W.-P. Hu, H.-Y. Chen, G. C. Senadi, C.-Y. Chen and J.-J. Wang, *Org. Lett.* 2012, **14**, 3134–3137.
13. K. L. Jensen, D. U. Nielsen, T. F. Jamison, *Chem. Eur. J.* 2015, **21**, 7379-7383.
